# Supplementary material for: The “cobra effect” in the imidazolinone series: how a donor can disable the nucleophilicity
Source: Royal Society of Chemistry journal article supplement (doi:10.1039/d3qo00580a), 2023-01-01
Supplement: d3qo00580a2.pdf [file d3qo00580a2.pdf]

## Contents

|                                                                                 |    |
|---------------------------------------------------------------------------------|----|
| Experimental Section.....                                                       | 2  |
| General methods.....                                                            | 2  |
| Synthesis of imidazolinone 1a.....                                              | 2  |
| Synthesis of imidazolinones 1e-g <sup>4</sup> .....                             | 3  |
| Synthesis of compound 2a.....                                                   | 4  |
| Dimerization of imidazolin-2-ones in the presence of TsOH.....                  | 4  |
| Synthesis of 2-hydroxyimidazolium salts 3a,b.....                               | 4  |
| Synthesis of 2-hydroxyimidazolium salt 3c.....                                  | 5  |
| X-ray data for the compound 3c.....                                             | 5  |
| Tautomers of imidazolin-2-ones.....                                             | 7  |
| Energies of orbitals.....                                                       | 7  |
| Comparison of quantum chemistry calculations at different levels of theory..... | 7  |
| Energy profiles for the reactions of imidazolinones.....                        | 8  |
| NMR studies of imidazolinone 1e.....                                            | 9  |
| Reaction conditions optimization.....                                           | 9  |
| References.....                                                                 | 10 |
| Copies of NMR spectra.....                                                      | 11 |
| Coordinates of stationary points for studied compounds.....                     | 25 |

## Experimental Section

### General methods

$^1\text{H}$  spectra were recorded on a Bruker MSL 400 (400 MHz) spectrometer.  $^{13}\text{C}$  NMR spectra were recorded on a Bruker MSL 400 (100 MHz) spectrometer. Chemical shifts were reported in parts per million (ppm), and the residual solvent peak was used as an internal reference (proton,  $\text{CDCl}_3$   $\delta$  7.28,  $\text{CD}_3\text{OD}$   $\delta$  3.32,  $(\text{CD}_3)_2\text{CO}$   $\delta$  2.12,  $(\text{CD}_3)_2\text{SO}$   $\delta$  2.50; carbon,  $\text{CDCl}_3$   $\delta$  77.7,  $(\text{CD}_3)_2\text{SO}$   $\delta$  40.0). Multiplicity was indicated as follows: s (singlet), d (doublet), t (triplet), q (quartet), m (multiplet), dd (doublet of doublet), td (triplet of doublet), bs (broad singlet). Coupling constants were reported in Hertz (Hz). The IR spectra were recorded on a Vector 22 Fourier spectrometer by Bruker in the range of 400-4000  $\text{cm}^{-1}$ . Crystalline samples were studied as a suspension in vaseline oil. The melting points were determined in glass capillaries on a Stuart SMP 10 instrument. Elemental analysis of the compounds was carried out on a high-temperature 2-reactor C, H, Nanalyzer of EuroVector brand EA 3000. The halogen content was determined by the Schöniger method. MALDI-TOF mass spectra were recorded on a Bruker ULTRAFLEX III TOF/TOF instrument (with 2,5-dihydroxybenzoic acid matrix). All commercially available reagents were used as received for the reactions without any purification. All solvents were purified and dried according to standard procedures. 4,4'-bi(imidazole-2-one) **2b** and diimidazoquinoline **4** have been described earlier<sup>4</sup> and were not isolated in pure form.

### Synthesis of imidazolinone **1a**

The synthesis of imidazolin-2-one **1a** via the acid-catalyzed cyclization of 1-(2,2-diethoxyethyl)urea was first claimed by Marckwald in 1892.<sup>1</sup> Later, Duschinsky and Dolan re-investigated this reaction and stated the formation of imidazolin-2-one **1a** in *ca* 40% yield upon heating of 1-(2,2-diethoxyethyl)urea in the presence of sulfuric acid.<sup>2</sup> Alongside with desired imidazolinone, the unidentified product was obtained, which was believed to be a dimer or a polymer arising from intermolecular condensation of starting acetal. The same procedure was used by Han and Zard, and the yield of 44% of compound **1a** was reported.<sup>3</sup> Duschinsky and Dolan also described the synthesis of compound **1a** in 80% yield by carrying out the reaction in diluted solution of sulfuric acid at room temperature for 72 hours. However, we were unable to reproduce this result, and the yield didn't exceed 30-35%.

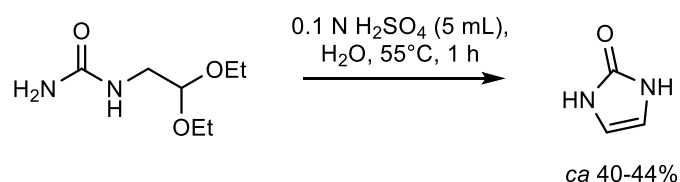

We speculated that the low yield of imidazolinone **1a** may be due to the formation of bis(imidazolinone) **2a** in acidic media. According to our observations reported in present paper, this undesired side reaction can be suppressed by the formation of 2-hydroxyimidazolium salt. Indeed, when excess of TFA was employed instead of sulfuric acid and the reaction time was limited to 6 hours, the target imidazolin-2-one **1a** was isolated in 60% overall yield. Still, the formation of the compound **2a** was also observed (*ca* 10-15% according to NMR data). The modified procedure for the synthesis of compound **2a** is given below.

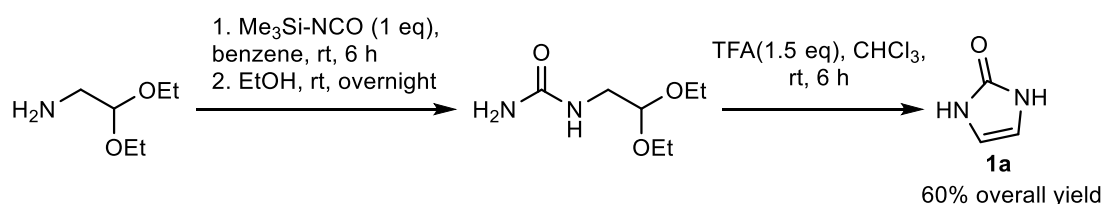

To a solution of trimethylsilylisocyanate (0.54 g, 4.7 mmol, 1.0 equiv.) in benzene (10 mL) 2,2-diethoxyethane-1-amine (0.50 g, 4.7 mmol, 1.0 equiv.) was added. The reaction mixture was stirred at room

temperature for 6 h, and the solvent was evaporated in vacuum. The residue was re-dissolved in ethanol (10 mL) and stirred at room temperature overnight. The volatiles were removed in vacuum; the residue was dissolved in chloroform (5 mL). To this solution, trifluoroacetic acid (0.81 g, 0.54 mL, 7.1 mmol, 1.5 equiv.) was added. The reaction mixture was stirred at room temperature for 6 h and washed with saturated solution of NaHCO<sub>3</sub> (3x10 mL). The organic layer was evaporated in vacuum and the residue was recrystallized from small amount of distilled water to give compound **1a** as white crystalline solid. Yield 240 mg (60%). Mp = 248-253°C. <sup>1</sup>H NMR (400 MHz, DMSO-*d*<sub>6</sub>) δ 9.67 (br s, 2H, NH), 6.24 (t, *J*=2.0 Hz, 2H, CH). <sup>13</sup>C NMR (126 MHz, DMSO-*d*<sub>6</sub>) δ 155.9, 109.0.

### Synthesis of imidazolinones **1e-g**<sup>4</sup>

#### 1-methyl-3-phenylimidazolin-2-one (**1e**)

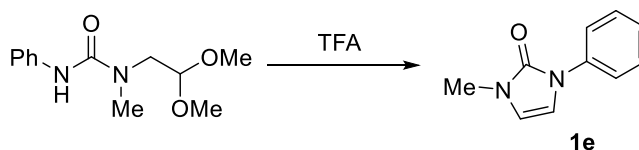

To a 25 mL flask a 1-(2,2-dimethoxyethyl)-1-methyl-3-phenylurea<sup>4</sup> (0.50 g, 2.1 mmol, 1.0 equiv.), chloroform (10 mL) and TFA (0.28 mL, 0.353 g, 3.1 mmol, 1.5 equiv.) were added. The reaction mixture was allowed to stir at room temperature for 6 h and concentrated under reduced pressure. To the resulting yellow oily residue distilled water (15 mL) and Na<sub>2</sub>CO<sub>3</sub> (0.45 g, 4.2 mmol, 2 equiv.) were added. The precipitate was filtered off, washed with distilled water (3x20 mL) and dried under reduced pressure to give the compound **1e** as yellowish solid (329 mg, yield 90%), which was used without further purification. Mp 105-107 °C; <sup>1</sup>H NMR (400 MHz, CDCl<sub>3</sub>) δ 7.62-7.56 (m, 2H, ArH), 7.43-7.35 (m, 2H, ArH), 7.24-7.18 (m, 1H, ArH), 6.55 (d, 1H, *J* = 3.0 Hz, CH), 6.30 (d, 1H, *J* = 3.1 Hz, CH), 3.29 (s, 3H, CH<sub>3</sub>). <sup>13</sup>C NMR (126 MHz, CDCl<sub>3</sub>) δ 152.6, 138.0, 129.7, 126.2, 122.0, 113.3, 109.7, 31.0.

<sup>1</sup>H NMR (400 MHz, DMSO-*d*<sub>6</sub>) δ 7.74-7.68 (m, 2H, ArH), 7.45-7.39 (m, 2H, ArH), 7.24-7.18 (m, 1H, ArH), 7.00 (d, 1H, *J* = 3.1 Hz, CH), 6.71 (d, 1H, *J* = 3.1 Hz, CH), 3.28 (s, 3H, CH<sub>3</sub>). <sup>13</sup>C NMR (126 MHz, DMSO-*d*<sub>6</sub>) δ 152.4, 138.5, 130.0, 126.0, 121.4, 114.6, 109.7, 31.0.

<sup>1</sup>H NMR (400 MHz, (CD<sub>3</sub>)<sub>2</sub>CO) δ 7.84-7.77 (m, 2H, ArH), 7.50-7.46 (m, 2H, ArH), 7.30-7.25 (m, 1H, ArH), 6.95 (d, 1H, *J* = 3.2 Hz, CH), 6.68 (d, 1H, *J* = 3.1 Hz, CH), 3.31 (s, 3H, CH<sub>3</sub>).

<sup>1</sup>H NMR (400 MHz, CD<sub>3</sub>OD) δ 7.62-7.57 (m, 2H, ArH), 7.49-7.42 (m, 2H, ArH), 7.33-7.28 (m, 1H, ArH), 6.84 (d, 1H, *J* = 3.0 Hz, CH), 6.63 (d, 1H, *J* = 3.0 Hz, CH), 3.32 (s, 3H, CH<sub>3</sub>).

Anal. Calcd for C<sub>10</sub>H<sub>10</sub>N<sub>2</sub>O: C, 68.95; H, 5.79; N, 16.08. Found: C, 68.80; H, 5.63; N, 16.13. MS (ESI) *m/z* calcd for C<sub>10</sub>H<sub>10</sub>N<sub>2</sub>O: 174.2; found 175.1 [M+H]<sup>+</sup>, 197.5 [M+Na]<sup>+</sup>.

#### 1-(4-chlorophenyl)-3-methylimidazolin-2-one (**1f**)

The compound **1f** was obtained using the same procedure as described above from 0.500 g (1.83 mmol) of 1-(2,2-dimethoxyethyl)-1-methyl-3-(4-chlorophenyl)urea<sup>4</sup> and used without additional purification. Yellowish solid, yield 325 mg (85%), mp 70-74°C. <sup>1</sup>H NMR (400 MHz, CDCl<sub>3</sub>) δ 7.55-7.46 (m, 2H, ArH), 7.37-7.28 (m, 2H, ArH), 6.51 (d, 1H, *J* = 3.0 Hz, CH), 6.31 (d, 1H, *J* = 3.1 Hz, CH), 3.26 (s, 3H, CH<sub>3</sub>). <sup>13</sup>C NMR (126 MHz, DMSO-*d*<sub>6</sub>) δ 151.27, 140.58, 132.76, 120.06, 118.02, 113.70, 107.17, 30.02. Anal. Calcd for C<sub>10</sub>H<sub>9</sub>ClN<sub>2</sub>O: C, 57.57; H, 4.35; Cl, 16.99; N, 13.43. Found: C, 57.45; H, 4.40; Cl, 17.05; N, 13.39. MS (ESI) *m/z* calcd for C<sub>10</sub>H<sub>9</sub>ClN<sub>2</sub>O: 208.0; found 209.0 [M+H]<sup>+</sup>.

\* The signal of carbon atom of carbonyl group at 155.9 ppm was not observed in proton-decoupled <sup>13</sup>C NMR spectrum, thus <sup>1</sup>H-<sup>13</sup>C HMBC spectrum was recorded. The presence of the cross-peak between protons of methyne groups and carbon atom of C=O group confirms the assigned structure (see copies of spectra below).

### 1-(4-methoxyphenyl)-3-methylimidazolin-2-one (**1g**)

The compound **1g** was obtained using the same procedure as described above from 0.50 g (1.86 mmol) of 1-(2,2-dimethoxyethyl)-1-methyl-3-(4-methoxyphenyl)urea<sup>4</sup> and used without additional purification. Yellowish solid, yield 342 mg (90%), mp 84–88 °C. <sup>1</sup>H NMR (400 MHz, CDCl<sub>3</sub>) δ 7.54–7.41 (m, 2H, ArH), 6.98–6.89 (m, 2H, ArH), 6.50 (d, 1H, *J* = 3.0 Hz, CH), 6.30 (d, 1H, *J* = 3.1 Hz, CH), 3.83 (s, 3H, CH<sub>3</sub>), 3.32 (s, 3H, CH<sub>3</sub>). <sup>13</sup>C NMR (126 MHz, DMSO-*d*<sub>6</sub>) δ 151.98, 146.60, 125.02, 117.82, 108.72, 106.64, 104.11, 49.88, 24.85. Anal. Calcd for C<sub>11</sub>H<sub>12</sub>N<sub>2</sub>O<sub>2</sub>: C, 64.69; H, 5.92; N, 13.72. Found: C, 64.72; H, 5.88; N, 13.78. MS (ESI) *m/z* calcd for C<sub>11</sub>H<sub>12</sub>N<sub>2</sub>O<sub>2</sub>: 204.2; found 205.1 [M+H]<sup>+</sup>, 227.2 [M+Na]<sup>+</sup>.

### Synthesis of compound **2a**

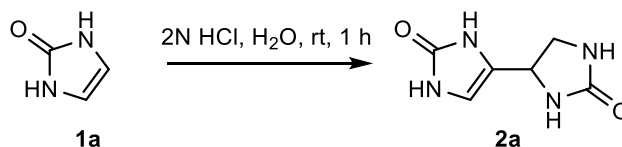

To a 25 mL flask an imidazolin-2-one **1a** (0.40 g, 4.7 mmol), distilled water (5 mL) and 2N HCl (3.56 mL, 7.1 mmol, 1.5 equiv.) were added. The reaction mixture was stirred at room temperature for 1 h. The solvent was removed under reduced pressure and the solid residue was recrystallized from ethanol to give 418 mg (53%) of the title compound **2a** as beige solid. Mp 50–54 °C. <sup>1</sup>H NMR (400 MHz, D<sub>2</sub>O) δ 3.42 (dd, *J* = 9.6, 7.1 Hz, 1H, CH), 3.79–3.70 (m, 1H, CH), 4.79 (dd, *J* = 9.4, 7.1 Hz, 1H, CH), 6.44 (s, 1H, CH). <sup>13</sup>C NMR (126 MHz, D<sub>2</sub>O) δ 165.9, 155.9, 123.4, 110.7, 107.9, 48.9, 46.5. Anal. Calcd for C<sub>6</sub>H<sub>8</sub>N<sub>4</sub>O<sub>2</sub>: C, 42.86; H, 4.80; N, 33.32. Found: C, 42.98; H, 4.88; N, 33.29. MS (ESI) *m/z* calcd for C<sub>6</sub>H<sub>8</sub>N<sub>4</sub>O<sub>2</sub>: 168.1, found: 192.2 [M+Na]<sup>+</sup>.

### Dimerization of imidazolin-2-ones in the presence of TsOH

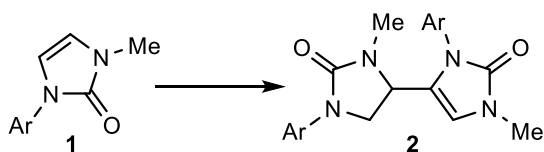

Ar = Ph (**1e**, **2b**); 4-Cl-C<sub>6</sub>H<sub>4</sub> (**1f**, **2c**); 4-MeO-C<sub>6</sub>H<sub>4</sub> (**1g**, **2d**)

To a 25 mL flask an imidazolin-2-one **1** (2.1 mmol, 1.0 equiv.), chloroform (5 mL) and TsOH (0.072 g, 0.42 mmol, 0.2 equiv.) were added. The reaction mixture was stirred at room temperature for 7 days. The solvent was removed under reduced pressure and the solid residue was analyzed by <sup>1</sup>H NMR.

### Synthesis of 2-hydroxyimidazolium salts **3a,b**

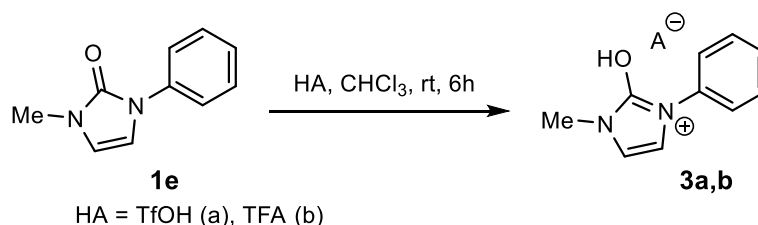

HA = TfOH (a), TFA (b)

To a 25 mL flask an imidazolinone **1e** (0.5 g, 2.1 mmol, 1.0 equiv.) chloroform (5 mL) and appropriate acid (3.1 mmol, 1.5 equiv.) were added. The reaction mixture was stirred at room temperature for 6 h and concentrated under reduced pressure. The residue was washed thoroughly with dry diethyl ether (3x25 mL) and dried under reduced pressure to give the compound **3**.

**2-hydroxy-1-methyl-3-phenylimidazolium triflate (3a)**. Yellow gum, 0.67 g (98% yield). <sup>1</sup>H NMR (400 MHz, CDCl<sub>3</sub>) δ 7.55–7.47 (m, 3H, ArH), 7.45–7.41 (m, 2H, ArH), 6.92 (d, 1H, *J* = 2.5 Hz, CH), 6.88 (d, 1H, *J* = 2.6 Hz,

CH), 3.70 (s, 3H, CH<sub>3</sub>). <sup>13</sup>C NMR (126 MHz, CDCl<sub>3</sub>) δ 148.4, 134.2, 130.4, 130.0, 124.9, 117.5, 115.9, 33.4. Anal. Calcd for C<sub>11</sub>H<sub>11</sub>N<sub>2</sub>O<sub>4</sub>SF<sub>3</sub>: C, 40.74; H, 3.42; F, 17.58; N, 8.64; S, 9.89. Found: C, 40.68; H, 3.51; F, 17.40; N, 8.60; S, 9.81. MS (ESI) *m/z* calcd for C<sub>11</sub>H<sub>11</sub>N<sub>2</sub>O<sub>4</sub>SF<sub>3</sub>: 324.3; found 175.0 [M-CF<sub>3</sub>SO<sub>3</sub>]<sup>+</sup>.

*2-hydroxy-1-methyl-3-phenylimidazolium trifluoroacetate (3b)*. Brown hygroscopic gum, 0.60 g (ca 100% yield). <sup>1</sup>H NMR (400 MHz, DMSO-*d*<sub>6</sub>) δ 7.74-7.67 (m, 2H, ArH), 7.45-7.38 (m, 2H, ArH), 7.24-7.17 (m, 1H, ArH), 6.97 (d, 1H, *J* = 3.1 Hz, CH), 6.69 (d, 1H, *J* = 3.1 Hz, CH), 3.20 (s, 3H, CH<sub>3</sub>). <sup>13</sup>C NMR (126 MHz, DMSO-*d*<sub>6</sub>) δ 158.8 (q, *J* = 38.7 Hz), 151.8, 137.9, 129.4, 125.5, 121.0, 114.0, 109.1, 30.3.

<sup>1</sup>H NMR (400 MHz, CDCl<sub>3</sub>) δ 7.59-7.53 (m, 2H, ArH), 7.47-7.39 (m, 2H, ArH), 7.31-7.23 (m, 1H, ArH), 6.60 (d, 1H, *J* = 3.0 Hz, CH), 6.38 (d, 1H, *J* = 3.0 Hz, CH), 3.36 (s, 3H, CH<sub>3</sub>). <sup>13</sup>C NMR (126 MHz, CDCl<sub>3</sub>) δ 159.2 (q, *J* = 40.5 Hz), 152.6, 137.4, 129.8, 127.0, 122.8, 113.6, 110.7, 31.3.

<sup>1</sup>H NMR (400 MHz, (CD<sub>3</sub>)<sub>2</sub>CO) δ 9.04-8.94 (m, 2H, ArH), 8.73-8.64 (m, 2H, ArH), 8.54-8.43 (m, 1H, ArH), 8.16 (d, 1H, *J* = 3.1 Hz, CH), 7.90 (d, 1H, *J* = 3.1 Hz, CH), 4.53 (s, 3H, CH<sub>3</sub>).

<sup>1</sup>H NMR (400 MHz, CD<sub>3</sub>OD) δ 7.61-7.56 (m, 2H, ArH), 7.48-7.40 (m, 2H, ArH), 7.32-7.24 (m, 1H, ArH), 6.82 (d, 1H, *J* = 3.0 Hz, CH), 6.61 (d, 1H, *J* = 3.0 Hz, CH), 3.31 (s, 3H, CH<sub>3</sub>).

Anal. Calcd for C<sub>12</sub>H<sub>11</sub>N<sub>2</sub>O<sub>3</sub>F<sub>3</sub>: C, 50.01; H, 3.85; F, 19.77; N, 9.72. Found: C, 49.89; H, 3.89; F, 19.82; N, 9.69. MS (ESI) *m/z* calcd for C<sub>12</sub>H<sub>11</sub>N<sub>2</sub>O<sub>3</sub>F<sub>3</sub>: 288.23, found: 175.0 [M-CF<sub>3</sub>COO]<sup>+</sup>.

### Synthesis of 2-hydroxyimidazolium salt 3c

To a 25 mL flask an imidazolinone **1a** (0.5 g, 2.1 mmol, 1.0 equiv.) and trifluoroacetic acid (3 mL) were added. The reaction mixture was stirred at room temperature for 10 min and concentrated under reduced pressure to give the compound **3c** as a yellowish gum, which solidifies upon keeping in freezer. NMR spectra of this compound in individual form could not be obtained due to its quick conversion to the bis(imidazolinone) **2a** in a solution.

### X-ray data for the compound 3c

X-ray diffraction (XRD) data for the single crystal of **3c** were obtained on a Bruker D8 QUEST automated three-circle diffractometer with a PHOTON III area detector and an I $\mu$ S DIAMOND microfocus X-ray tube:  $\lambda(\text{Mo K}\alpha) = 0.71073 \text{ \AA}$ ,  $\omega/\varphi$  scanning mode with a step of 0.5°. Data collection and indexing, determination and refinement of unit cell parameters were carried out using the APEX3 software package. Numerical absorption correction based on the crystal shape, additional spherical absorption correction, and systematic error correction were performed using the SADABS-2016/2 software.<sup>5</sup> Using OLEX2,<sup>6</sup> structures were solved by direct methods using the SHELXT-2018/3 program<sup>7</sup> and refined by full-matrix least-squares on  $F^2$  using the SHELXL-2018/3 program.<sup>8</sup> Nonhydrogen atoms were refined anisotropically. Positions of H(O/N) hydrogen atom were determined from difference electron density maps and refined isotropically. The remaining hydrogen atoms were refined using a riding model. Most calculations were performed using the WinGX-2021.3 software package.<sup>9</sup> The crystallographic data for structure are listed in Table S1.

Compound **3c** crystallizes in the ionic form with the flat imidazolium cation and the anion of trifluoroacetic acid as a counterion. The structure was solved in the triclinic space group P $\bar{1}$  with two independent cation-anion pairs A and B ( $Z' = 2$ ), whose geometry is similar. In the cationic part, the lengths of the N1A-C1A and N2A-C1A bonds are equal and constitute an intermediate value between a single and a double bond (1.331(5)), hydrogen atoms on both nitrogen atoms are identified and refined with integer occupancy. This situation corresponds to the delocalization of the positive charge in the triatomic fragment N1A-C1A-N2A. Numerous hydrogen bonds between cations and anions are realized in the crystal.

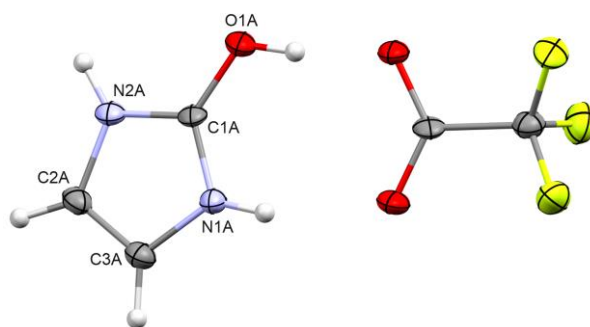

Figure S1 Molecular geometry of **3c** in the crystal (molecule A). Thermal ellipsoids for non-H atoms are set at the 50% probability level

Table S1 Crystallographic data for the compound **3c**

| Compound                                | <b>3c</b>                                                                                                                                                 |
|-----------------------------------------|-----------------------------------------------------------------------------------------------------------------------------------------------------------|
| Empirical formula                       | C <sub>3</sub> H <sub>5</sub> N <sub>2</sub> O <sup>+</sup> , C <sub>2</sub> F <sub>3</sub> O <sub>2</sub> <sup>-</sup>                                   |
| Formula weight                          | 198.11                                                                                                                                                    |
| Radiation, wavelength                   | Mo K $\alpha$ , 0.71073 Å                                                                                                                                 |
| Temperature                             | 100(2)                                                                                                                                                    |
| Crystal system                          | Triclinic                                                                                                                                                 |
| Space group                             | $P\bar{1}$ (No. 2)                                                                                                                                        |
| Unit cell dimensions                    | $a = 8.243(2)$ Å,<br>$b = 8.488(3)$ Å,<br>$c = 11.355(3)$ Å,<br>$\alpha = 80.218(8)^\circ$ ,<br>$\beta = 73.432(8)^\circ$ ,<br>$\gamma = 78.498(8)^\circ$ |
| Volume                                  | 740.9(4) Å <sup>3</sup>                                                                                                                                   |
| Z and Z'                                | 4 and 2                                                                                                                                                   |
| Calculated density                      | 1.776 g cm <sup>-3</sup>                                                                                                                                  |
| Absorption coefficient                  | 0.190 mm <sup>-1</sup>                                                                                                                                    |
| F(000)                                  | 400                                                                                                                                                       |
| Crystal size                            | 0.451 x 0.110 x 0.100 mm <sup>3</sup>                                                                                                                     |
| $\theta$ range for data collection      | 1.885° to 25.998°                                                                                                                                         |
| Index ranges                            | $-10 \leq h \leq 10$ ,<br>$-10 \leq k \leq 10$ ,<br>$-14 \leq l \leq 14$                                                                                  |
| Reflections collected                   | 20109                                                                                                                                                     |
| Independent reflections                 | 2895                                                                                                                                                      |
| $R_{int}$                               | 0.1088                                                                                                                                                    |
| $R\sigma$                               | 0.0700                                                                                                                                                    |
| Observed Data [ $I > 2\sigma(I)$ ]      | 1973                                                                                                                                                      |
| Completeness to $\theta = 25.242^\circ$ | 100.0                                                                                                                                                     |
| Max. and min. transmission              | 0.7460 and 0.5961                                                                                                                                         |
| Data / restraints / parameters          | 2895 / 0 / 259                                                                                                                                            |
| Goodness-of-fit on $F^2$                | 1.022                                                                                                                                                     |
| Final $R$ indices [ $I > 2\sigma(I)$ ]  | $R1 = 0.0553$ , $wR2 = 0.1299$                                                                                                                            |
| $R$ indices (all data)                  | $R1 = 0.0935$ , $wR2 = 0.1512$                                                                                                                            |
| Largest diff. peak and hole             | 0.400 and $-0.389$ e Å <sup>-3</sup>                                                                                                                      |
| CCDC number                             | 2253122                                                                                                                                                   |

## Tautomers of imidazolin-2-ones

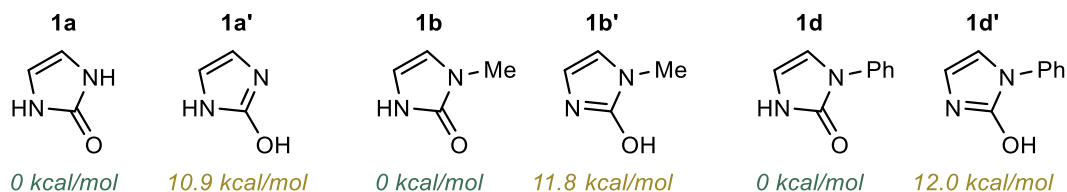

**Figure S2** Relative energies of imidazolin-2-ones and their 2-hydroxyimidazole tautomers as obtained from quantum chemistry calculations (B3PW91/def2-TZVPD // PBE/def2-TZVPD, Orca 5.0.3)

## Energies of orbitals

**Table S2** Energies of oxygen's lone pair and bonding  $\pi$ -orbital of C=C bond for the compounds **1a-d**<sup>a</sup>

|                     |  |  |  |  |  |
|---------------------|-----------------------------------------------------------------------------------|-----------------------------------------------------------------------------------|-----------------------------------------------------------------------------------|-------------------------------------------------------------------------------------|-------------------------------------------------------------------------------------|
| $E_{LP(O)}$ , eV    | -0.213                                                                            | -0.208                                                                            | -0.203                                                                            | -0.212                                                                              | -0.208                                                                              |
| $E_{\pi(C=C)}$ , eV | -0.342                                                                            | -0.338                                                                            | -0.334                                                                            | -0.356                                                                              | -0.354                                                                              |

<sup>a</sup> As obtained from NBO analysis (B3PW91/def2-TZVPD // PBE/def2-TZVPD, Orca 5.0.3, Janpa 2.02)

## Comparison of quantum chemistry calculations at different levels of theory

The functional for the quantum chemistry calculations was chosen based on the reproducibility of the experimental data for proton affinities of model compounds. As seen from the Table S3, both (B3PW91/def2-TZVPD // PBE/def2-TZVPD) methods combination and higher-level ( $\omega$ B97X-V/def2-TZVPD) method give essentially the same results (the maximum difference between calculated values is 1.5 kcal/mol, the average difference is *ca* 0.5 kcal/mol). Notably, for both urea and pyridine, the predicted proton affinity fitted the experimental values perfectly (within the experimental error). Moreover, PBE/B3PW91 combination succeeded in correct prediction of proton affinity of ethylene (within 0.4 kcal/mol), whereas  $\omega$ B97X-V performed considerably worse (the geometry optimization resulted in three-centre two-electron cation instead of ethyl cation in this case). Based on this, (B3PW91/def2-TZVPD // PBE/def2-TZVPD) was the method of choice due to much less computational cost.

**Table S3** Comparison of proton affinities and gas-phase basicities calculated at different levels of theory.<sup>a</sup>

|                         | 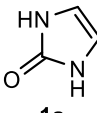 |                    |  |                    |                    | Urea                                      | Pyridine                                  | Ethylene                                 |
|-------------------------|-------------------------------------------------------------------------------------|--------------------|-------------------------------------------------------------------------------------|--------------------|--------------------|-------------------------------------------|-------------------------------------------|------------------------------------------|
| Protonation site        | O                                                                                   | C                  | O                                                                                   | C-NMe              | C-NPh              | O                                         | N                                         | C                                        |
| <b>PA</b><br>(kcal/mol) | -211.6<br>(-211.5)                                                                  | -198.6<br>(-199.3) | -222.3<br>(-222.6)                                                                  | -211.7<br>(-211.7) | -209.7<br>(-210.9) | -209.1<br>(-208.3)<br>-208.6 <sup>b</sup> | -222.9<br>(-222.2)<br>-222.1 <sup>b</sup> | 156.3<br>(-164.2)<br>-155.9 <sup>b</sup> |
| <b>GB</b><br>(kcal/mol) | -206.9<br>(-206.9)                                                                  | -194.0<br>(-194.7) | -217.7<br>(-218.3)                                                                  | -207.2<br>(-207.2) | -205.1<br>(-206.6) | -204.7<br>(-204.1)<br>-201.0 <sup>b</sup> | -217.8<br>(-217.6)<br>-214.5 <sup>b</sup> | 159.0<br>(-160.1)<br>162.8 <sup>b</sup>  |

<sup>a</sup> values for (B3PW91/def2-TZVPD // PBE/def2-TZVPD), values for ( $\omega$ B97X-V/def2-TZVPD) are given in parentheses; <sup>b</sup> experimental values (taken from paper by Abboud<sup>10</sup> (GB, urea), Cooks<sup>11</sup> (PA, urea), Lias<sup>12</sup> (GB and PA, pyridine; GB and PA, ethylene); Poutsma<sup>13</sup> gives value of 223.8 $\pm$ 2.0 kcal/mol for PA of pyridine)





## NMR studies of imidazolinone **1e**

**Table S4** Chemical shifts of signals in NMR spectra of imidazolinone **1e** in the presence of acids (CDCl<sub>3</sub>, 400 MHz, 303 K)

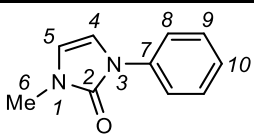

| Atom                      | 1e, $\delta$ , ppm | 1e + HA (1 equiv), $\delta$ ( $\Delta\delta$ ), <sup>a</sup> ppm |              |
|---------------------------|--------------------|------------------------------------------------------------------|--------------|
|                           |                    | TFA                                                              | TfOH         |
| <i><sup>1</sup>H NMR</i>  |                    |                                                                  |              |
| C <sup>5</sup> H          | 6.31               | 6.38 (+0.07)                                                     | 6.88 (+0.57) |
| C <sup>4</sup> H          | 6.56               | 6.60 (+0.04)                                                     | 6.92 (+0.36) |
| C <sup>6</sup> H          | 3.30               | 3.37 (+0.07)                                                     | 3.70 (+0.40) |
| C <sup>8</sup> H          | 7.60               | 7.57 (-0.03)                                                     | 7.43 (-0.17) |
| C <sup>9</sup> H          | 7.40               | 7.46 (+0.04)                                                     | 7.52 (+0.12) |
| C <sup>10</sup> H         | 7.23               | 7.29 (+0.06)                                                     | 7.51 (+0.28) |
| <i><sup>13</sup>C NMR</i> |                    |                                                                  |              |
| C <sup>2</sup>            | 152.6              | 152.6 (+0.0)                                                     | 148.4 (-4.2) |
| C <sup>4</sup>            | 109.7              | 110.7 (+1.0)                                                     | 117.5 (+7.8) |
| C <sup>5</sup>            | 113.3              | 113.6 (+0.3)                                                     | 115.9 (+2.6) |
| C <sup>6</sup>            | 31.0               | 31.3 (+0.3)                                                      | 33.4 (+2.4)  |
| C <sup>7</sup>            | 138.0              | 137.4 (-0.6)                                                     | 134.2 (-3.8) |
| C <sup>8</sup>            | 122.0              | 122.8 (+0.8)                                                     | 124.9 (+2.9) |
| C <sup>9</sup>            | 129.7              | 129.8 (+0.1)                                                     | 130.4 (+0.7) |
| C <sup>10</sup>           | 126.2              | 127.0 (+0.8)                                                     | 130.0 (+3.8) |

<sup>a</sup>  $\Delta\delta$  is calculated as  $\delta_H(\mathbf{1e} + \text{HA}) - \delta_H(\mathbf{1e})$

**Table S5** Chemical shifts of signals in <sup>1</sup>H NMR spectra of imidazolinone **1e** in the presence of TFA in various solvents (400 MHz, 303 K)

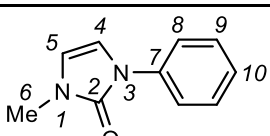

| Atom              | 1e, $\delta$ , ppm |                    |                                    |                                    | 1e + TFA (1 equiv), $\delta$ ( $\Delta\delta$ ), <sup>a</sup> ppm |                    |                                    |                                    |
|-------------------|--------------------|--------------------|------------------------------------|------------------------------------|-------------------------------------------------------------------|--------------------|------------------------------------|------------------------------------|
|                   | CDCl <sub>3</sub>  | CD <sub>3</sub> OD | (CD <sub>3</sub> ) <sub>2</sub> CO | (CD <sub>3</sub> ) <sub>2</sub> SO | CDCl <sub>3</sub>                                                 | CD <sub>3</sub> OD | (CD <sub>3</sub> ) <sub>2</sub> CO | (CD <sub>3</sub> ) <sub>2</sub> SO |
| C <sup>5</sup> H  | 6.31               | 6.63               | 6.68                               | 6.72                               | 6.38 (+0.07)                                                      | 6.61 (-0.02)       | 6.70 (+0.03)                       | 6.68 (-0.04)                       |
| C <sup>4</sup> H  | 6.56               | 6.84               | 6.95                               | 7.01                               | 6.60 (+0.04)                                                      | 6.82 (-0.02)       | 6.96 (+0.01)                       | 6.96 (-0.03)                       |
| C <sup>6</sup> H  | 3.30               | 3.32               | 3.31                               | 3.19                               | 3.37 (+0.07)                                                      | 3.31 (-0.01)       | 3.33 (+0.02)                       | 3.19 (0)                           |
| C <sup>8</sup> H  | 7.60               | 7.59               | 7.82                               | 7.71                               | 7.57 (-0.03)                                                      | 7.58 (-0.01)       | 7.80 (-0.02)                       | 7.69 (-0.02)                       |
| C <sup>9</sup> H  | 7.40               | 7.46               | 7.48                               | 7.43                               | 7.44 (+0.04)                                                      | 7.45 (-0.01)       | 7.49 (+0.01)                       | 7.41 (-0.02)                       |
| C <sup>10</sup> H | 7.23               | 7.30               | 7.28                               | 7.23                               | 7.29 (+0.06)                                                      | 7.29 (-0.01)       | 7.30 (+0.02)                       | 7.21 (-0.02)                       |

<sup>a</sup>  $\Delta\delta$  is calculated as  $\delta_H(\mathbf{1e} + \text{HA}) - \delta_H(\mathbf{1e})$

## Reaction conditions optimization

**Table S6** Optimization of catalyst and solvent for the self-condensation of imidazolinone **1e**<sup>a</sup>

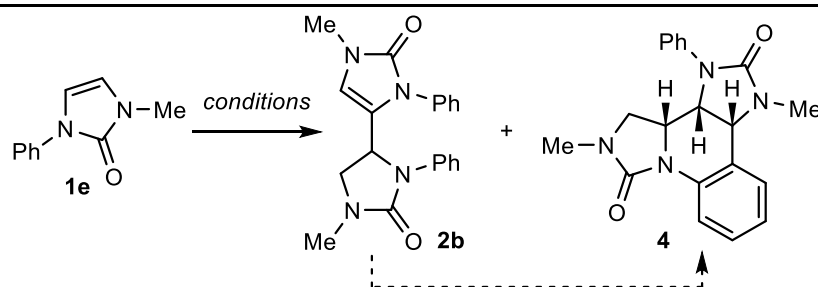

| Entry           | Solvent                            | Catalyst          | Yield of 2b, % <sup>b</sup> | Yield of 4, % <sup>b</sup> |
|-----------------|------------------------------------|-------------------|-----------------------------|----------------------------|
| 1               | CDCl <sub>3</sub>                  | TFA (0.1 equiv.)  | 0                           | 0                          |
| 2               | CD <sub>3</sub> OD                 | TFA (0.1 equiv.)  | 0                           | 0                          |
| 3               | (CD <sub>3</sub> ) <sub>2</sub> CO | TFA (0.1 equiv.)  | 0                           | 0                          |
| 4               | (CD <sub>3</sub> ) <sub>2</sub> SO | TFA (0.1 equiv.)  | 0                           | 0                          |
| 5               | CDCl <sub>3</sub>                  | TfOH (0.1 equiv.) | 0                           | 0                          |
| 6               | (CD <sub>3</sub> ) <sub>2</sub> SO | TfOH (0.1 equiv.) | 0                           | 0                          |
| 7               | (CD <sub>3</sub> ) <sub>2</sub> SO | TsOH (0.1 equiv.) | 5                           | 0                          |
| 8               | CDCl <sub>3</sub>                  | TsOH (1.0 equiv.) | 0                           | 92                         |
| 9               | CDCl <sub>3</sub>                  | TsOH (0.2 equiv.) | 21                          | 5                          |
| 10 <sup>c</sup> | CDCl <sub>3</sub>                  | TsOH (0.2 equiv.) | 64                          | 16                         |

<sup>a</sup> Reaction conditions: imidazolinone **1e** (1 equiv), catalyst, solvent, rt, 2 days; <sup>b</sup> according to NMR data; <sup>c</sup> after 7 days

## References

- 1 W. Marckwald, *Berichte der Dtsch. Chem. Gesellschaft*, 1892, **25**, 2354–2373.
- 2 R. Duschinsky and L. A. Dolan, *J. Am. Chem. Soc.*, 1946, **68**, 2350–2355.
- 3 S. Han and S. Z. Zard, *Org. Lett.*, 2014, **16**, 5386–5389.
- 4 E. A. Kuznetsova, A. V. Smolobochkin, T. S. Rizbayeva, A. S. Gazizov, J. K. Voronina, O. A. Lodochnikova, D. P. Gerasimova, A. B. Dobrynin, V. V. Syakaev, D. N. Shurpik, I. I. Stoikov, A. R. Burilov, M. A. Pudovik and O. G. Sinyashin, *Org. Biomol. Chem.*, 2022, **20**, 5515–5519.
- 5 L. Krause, R. Herbst-Irmer, G. M. Sheldrick and D. Stalke, *J. Appl. Crystallogr.*, 2015, **48**, 3–10.
- 6 O. V. Dolomanov, L. J. Bourhis, R. J. Gildea, J. A. K. Howard and H. Puschmann, *J. Appl. Crystallogr.*, 2009, **42**, 339–341.
- 7 G. M. Sheldrick, *Acta Crystallogr. Sect. A Found. Adv.*, 2015, **71**, 3–8.
- 8 G. M. Sheldrick, *Acta Crystallogr. Sect. C Struct. Chem.*, 2015, **71**, 3–8.
- 9 L. J. Farrugia, *J. Appl. Crystallogr.*, 2012, **45**, 849–854.
- 10 R. Notario, O. Castaño, M. Herreros and J.-L. M. Abboud, *J. Mol. Struct. THEOCHEM*, 1996, **371**, 21–29.
- 11 F. Wang, S. Ma, D. Zhang and R. G. Cooks, *J. Phys. Chem. A*, 1998, **102**, 2988–2994.
- 12 E. P. L. Hunter and S. G. Lias, *J. Phys. Chem. Ref. Data*, 1998, **27**, 413–656.
- 13 J. J. Wind, L. Papp, M. Happel, K. Hahn, E. J. Andriole and J. C. Poutsma, *J. Am. Soc. Mass Spectrom.*, 2005, **16**, 1151–1161.

**Copies of NMR spectra**

# Copies of NMR spectra

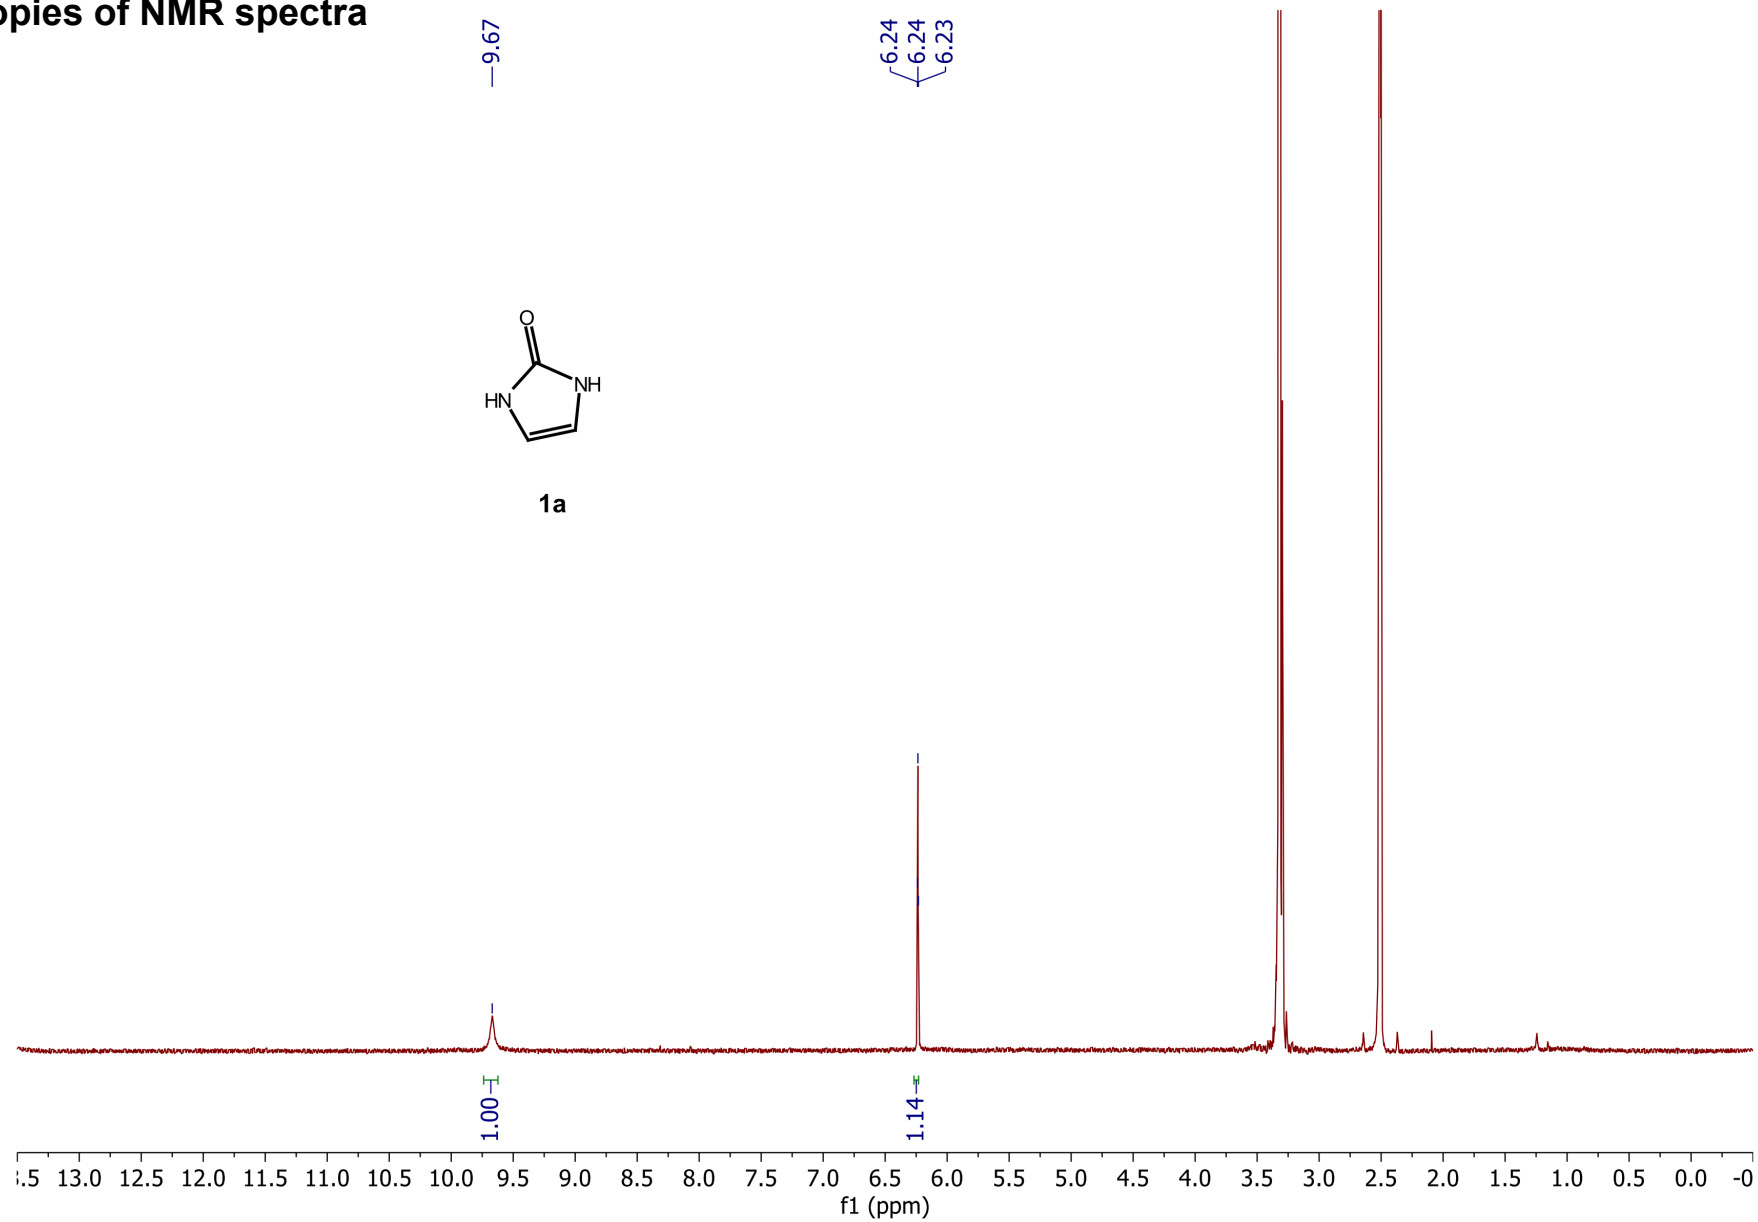

Figure S5.  $^1\text{H}$  NMR spectrum ( $(\text{CD}_3)_2\text{SO}$ , 400MHz) of the compound **1a**

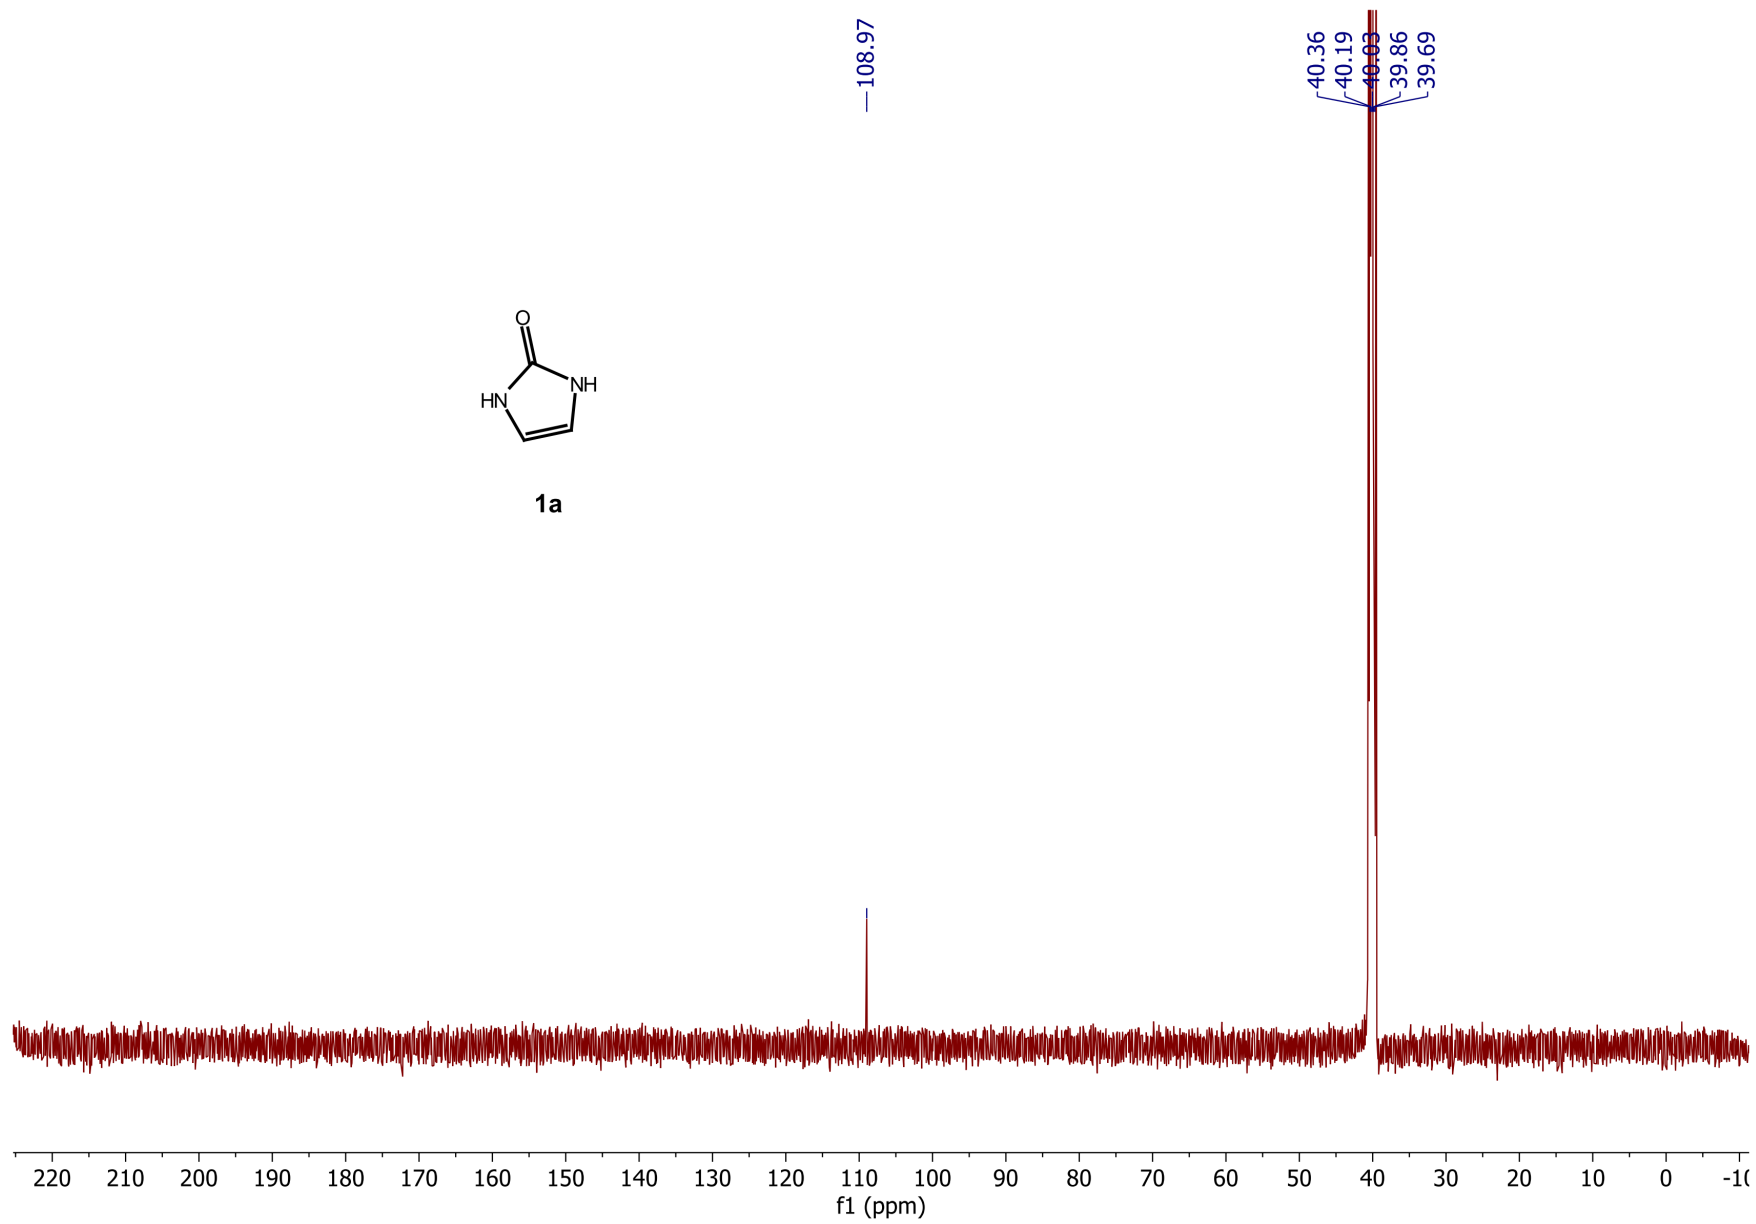

Figure S6.  $^{13}\text{C}$  NMR spectrum ( $(\text{CD}_3)_2\text{SO}$ , 126MHz) of the compound **1a**

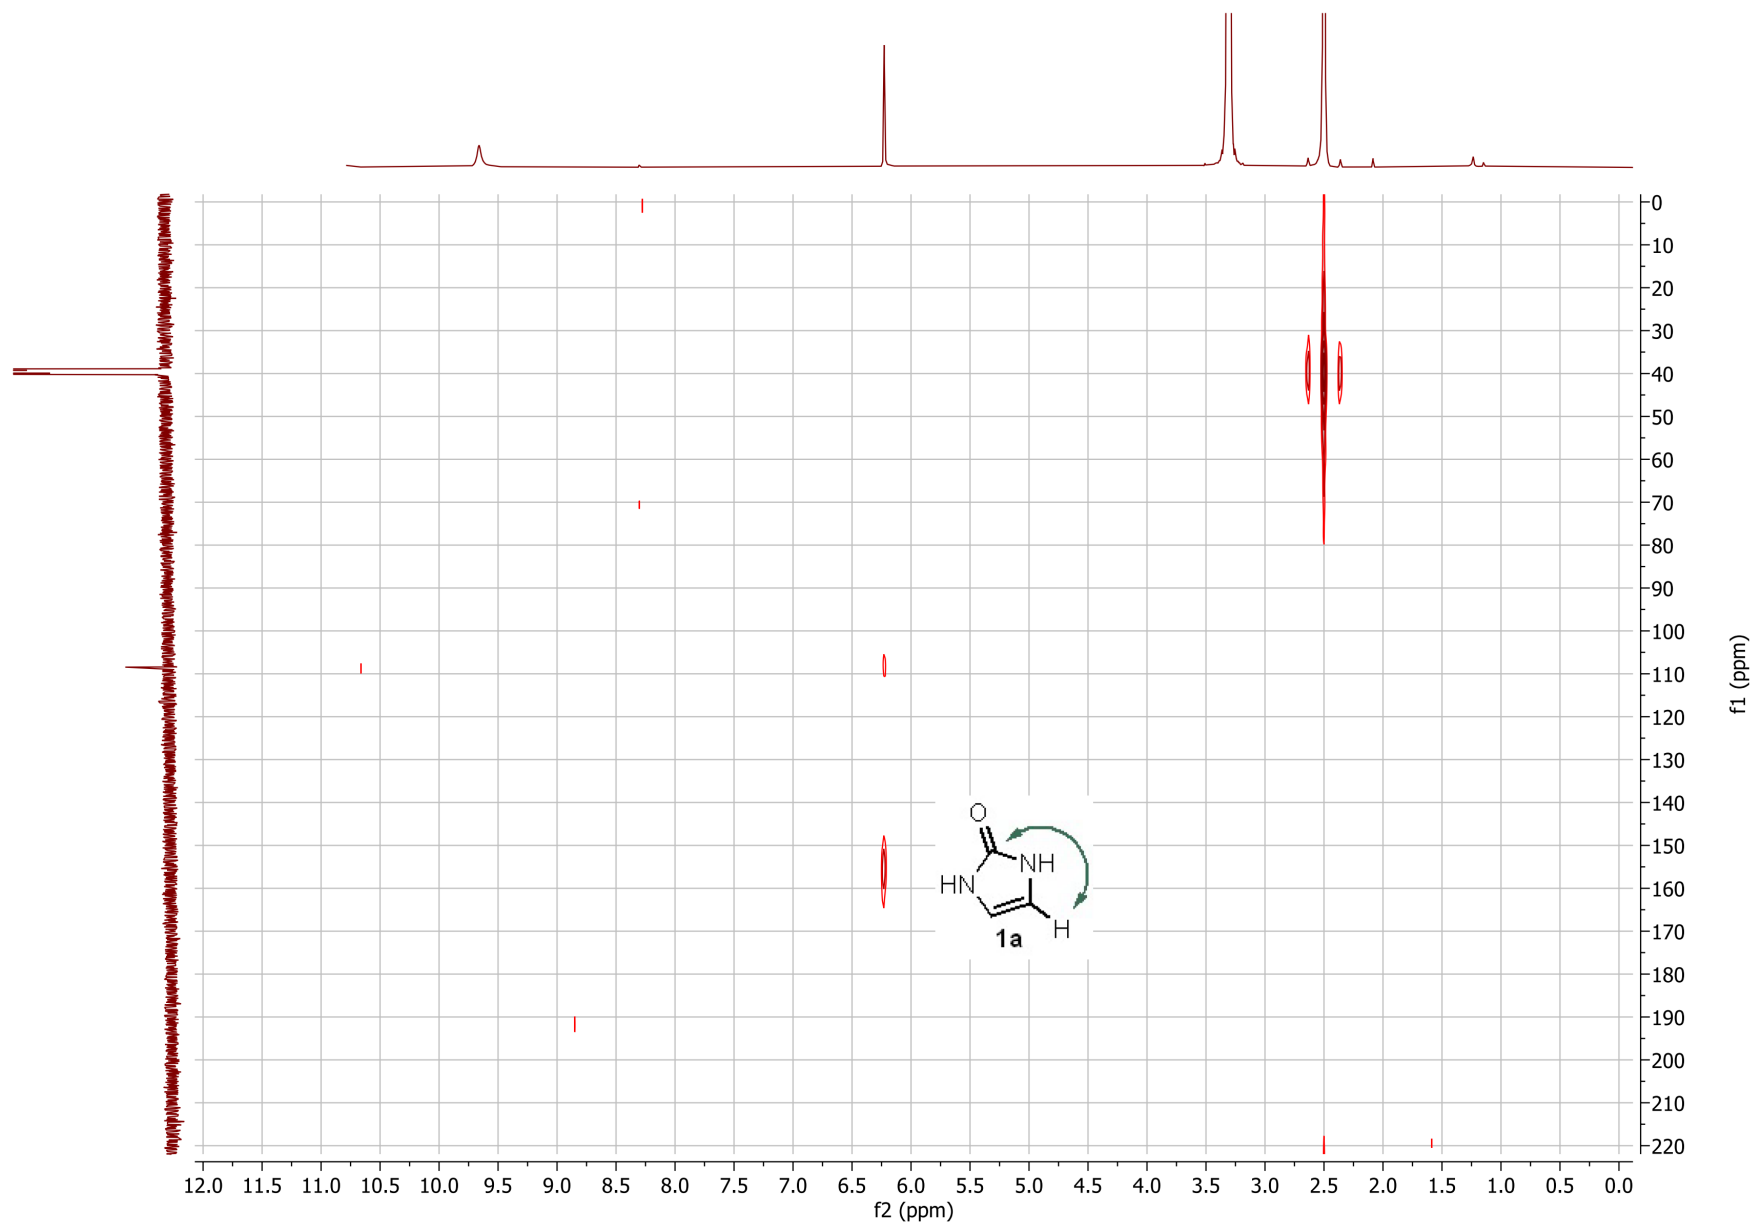

Figure S7.  $^1\text{H}$ - $^{13}\text{C}$  HMBC spectrum ( $(\text{CD}_3)_2\text{SO}$ ) of the compound **1a**

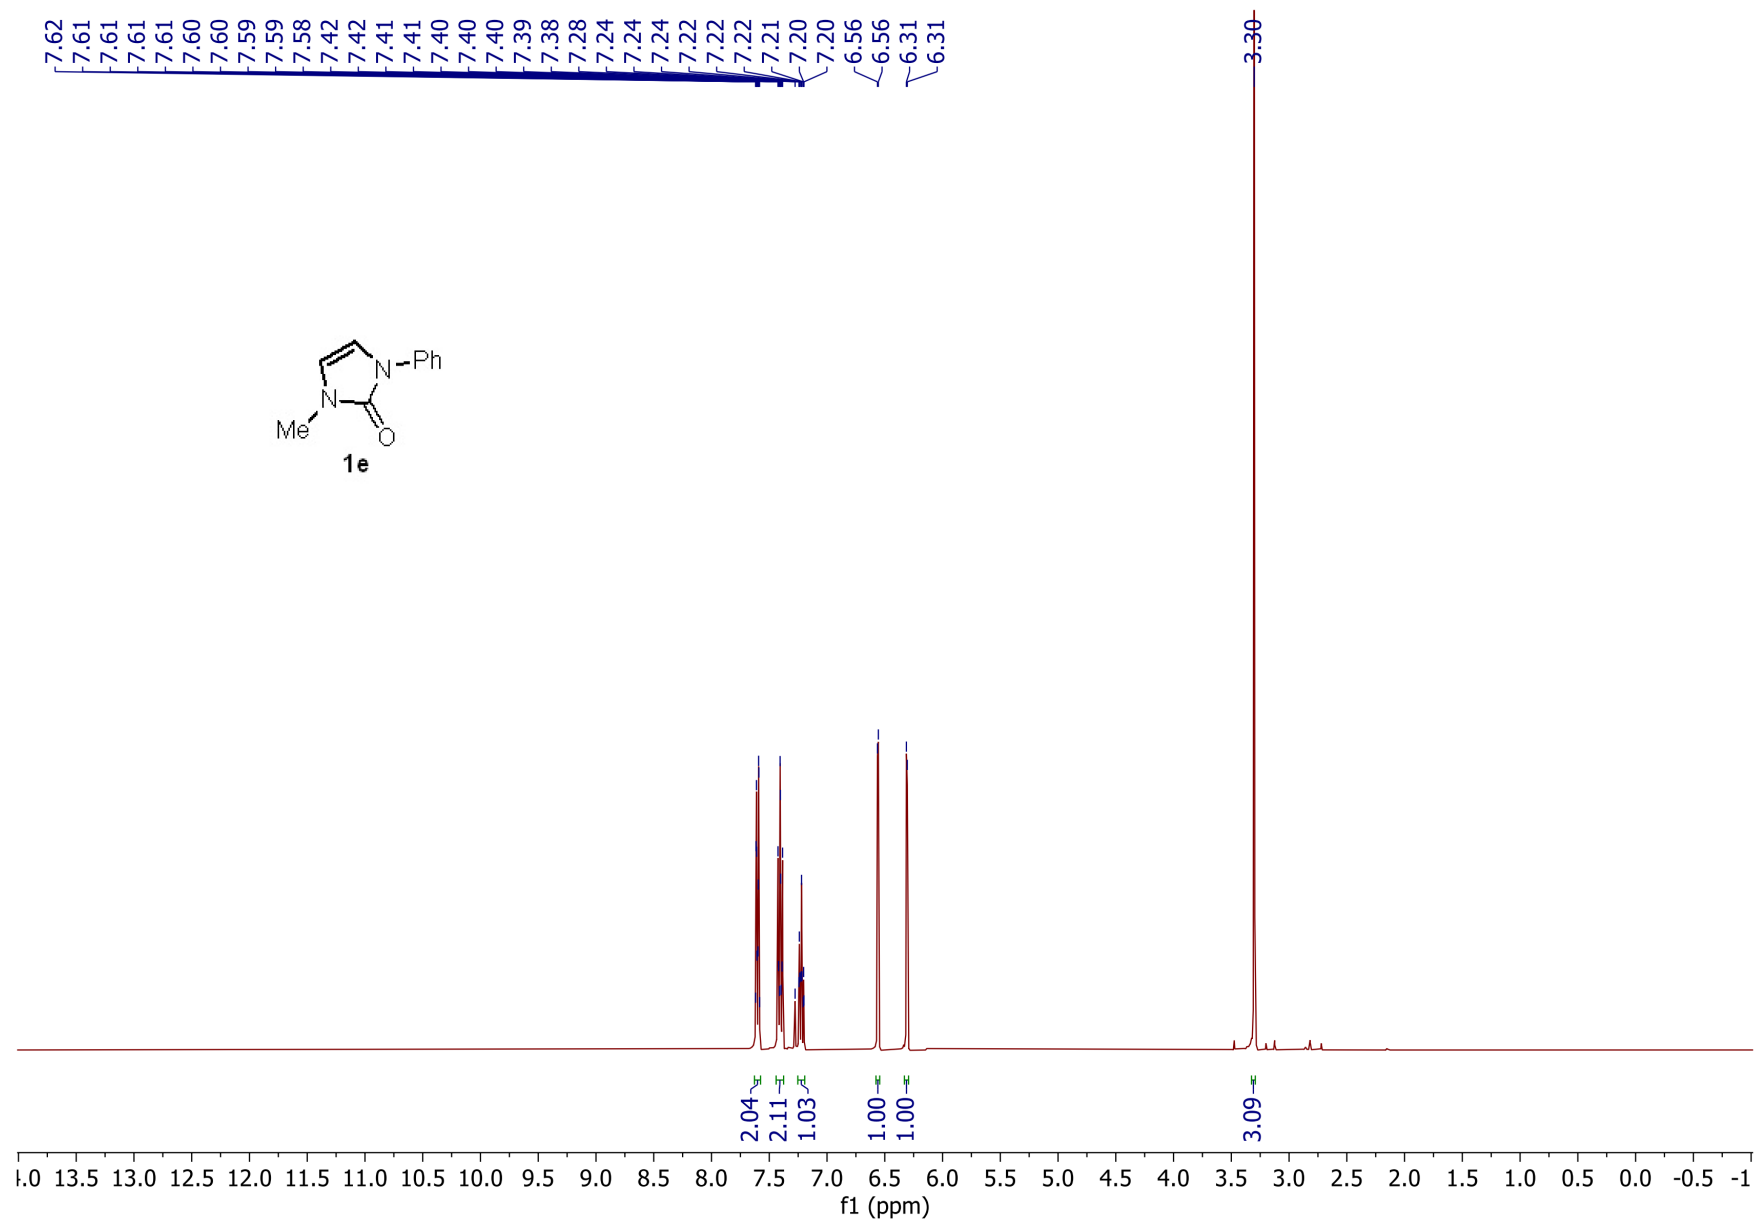

Figure S8.  $^1\text{H}$  NMR spectrum ( $\text{CDCl}_3$ , 400MHz) of the compound **1e**

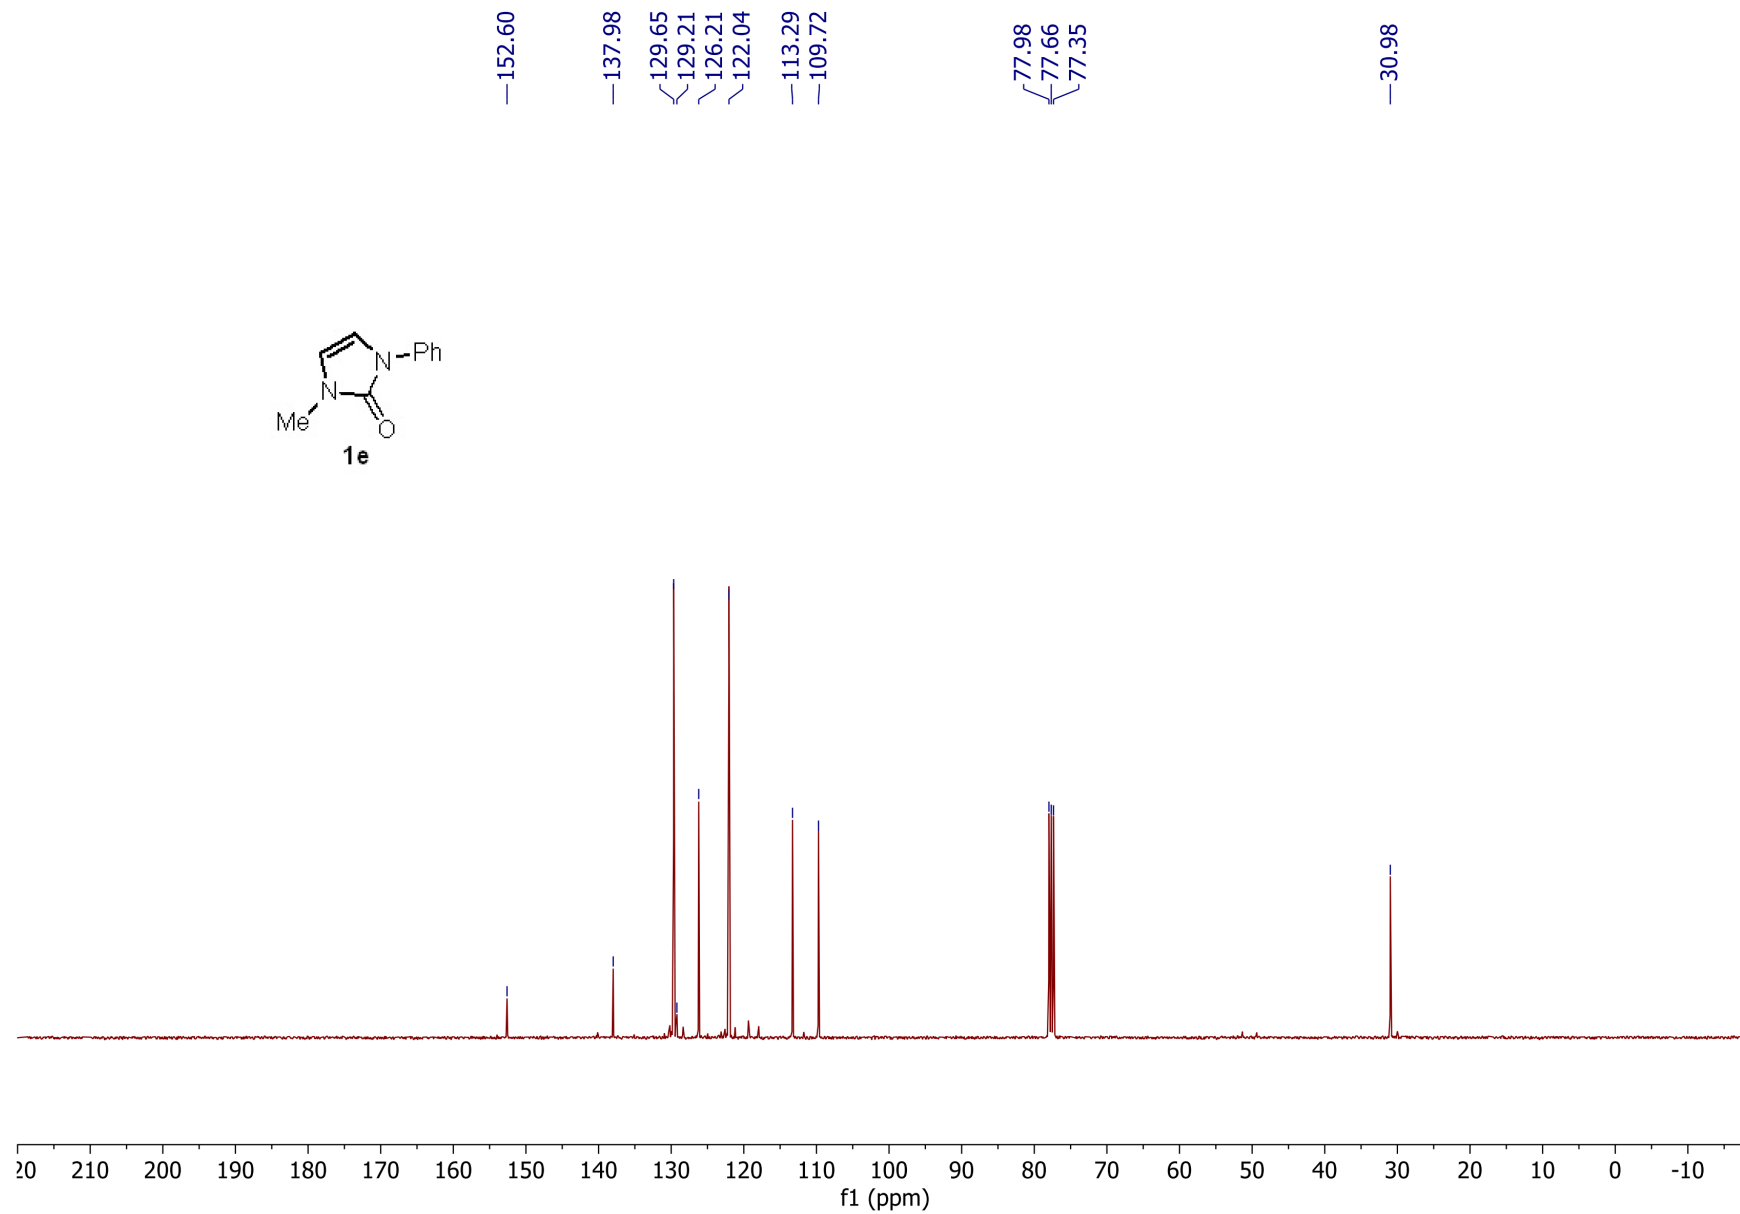

Figure S9.  $^{13}\text{C}$  NMR spectrum ( $\text{CDCl}_3$ , 126MHz) of the compound **1e**



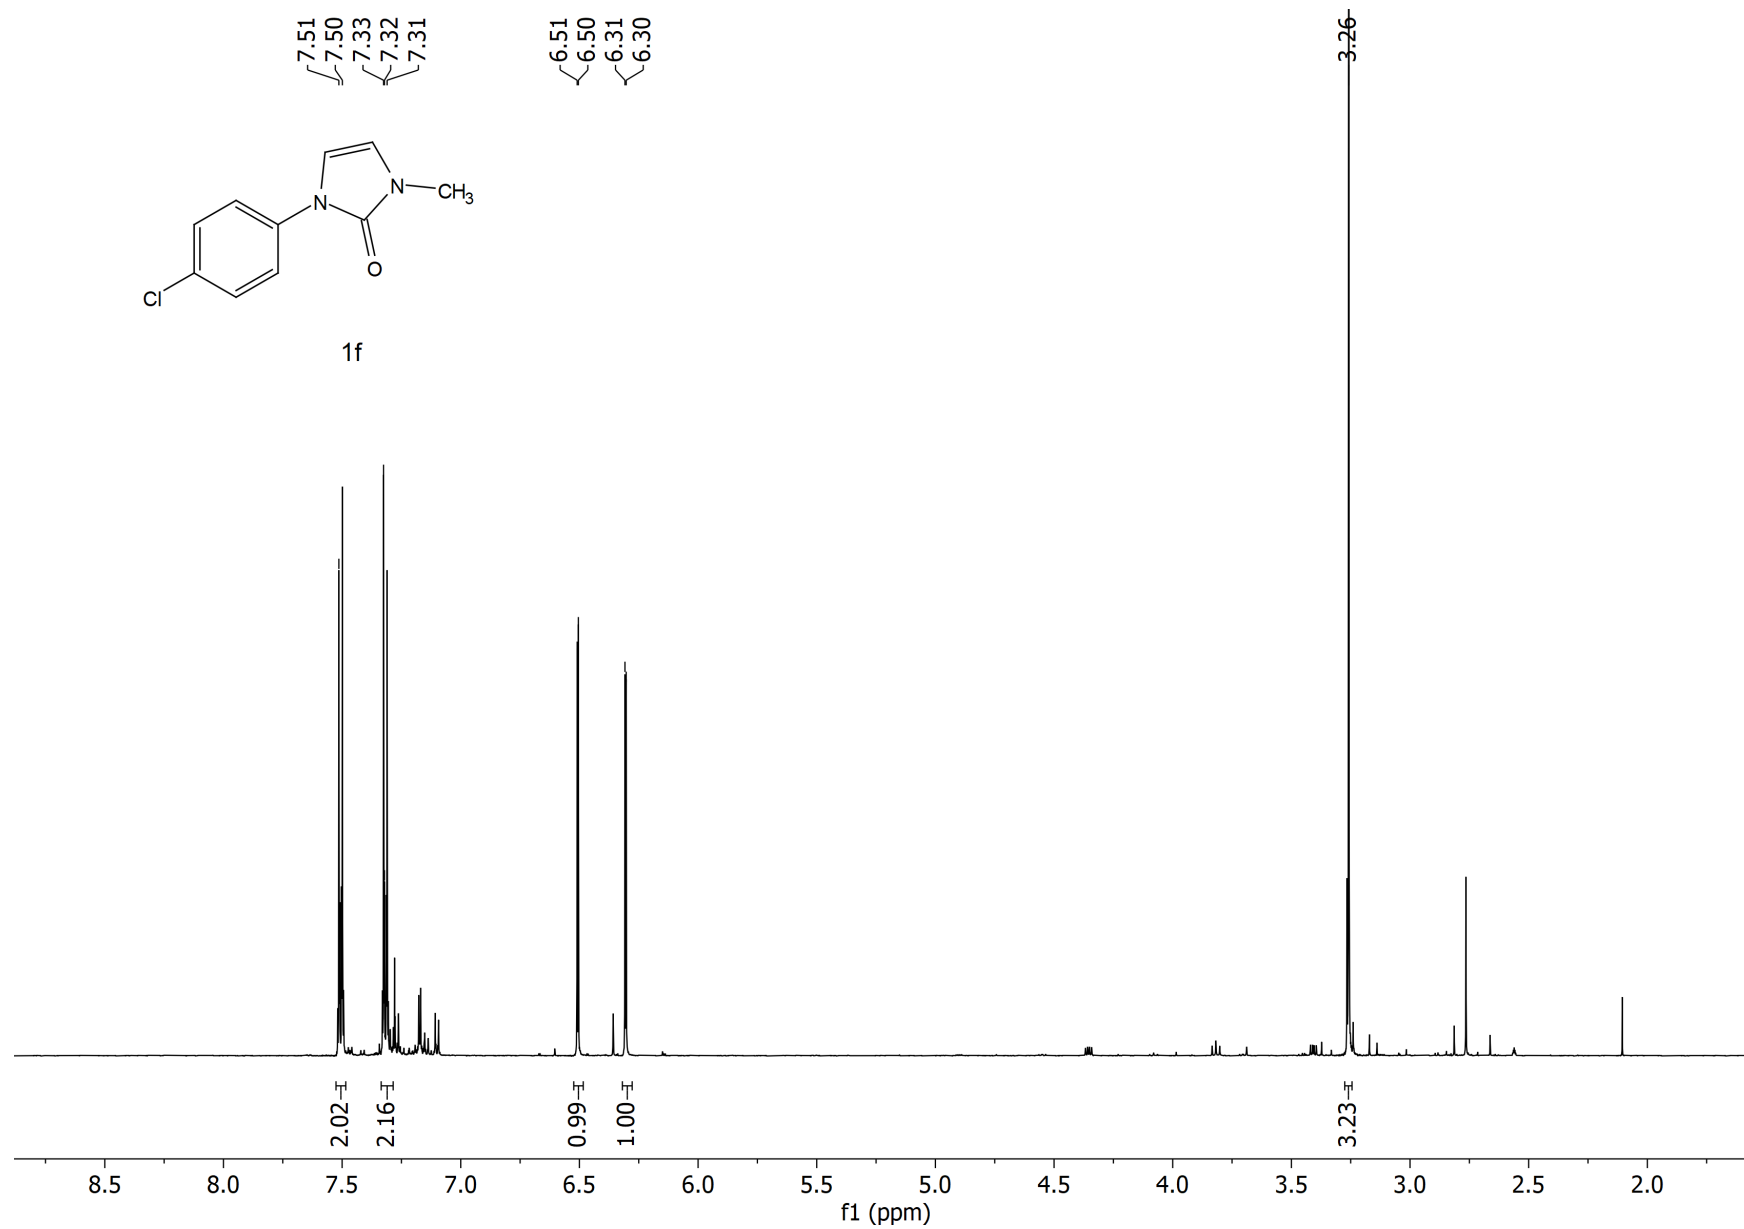

Figure S10. <sup>1</sup>H NMR spectrum (CDCl<sub>3</sub>, 400MHz) of the compound **1f**

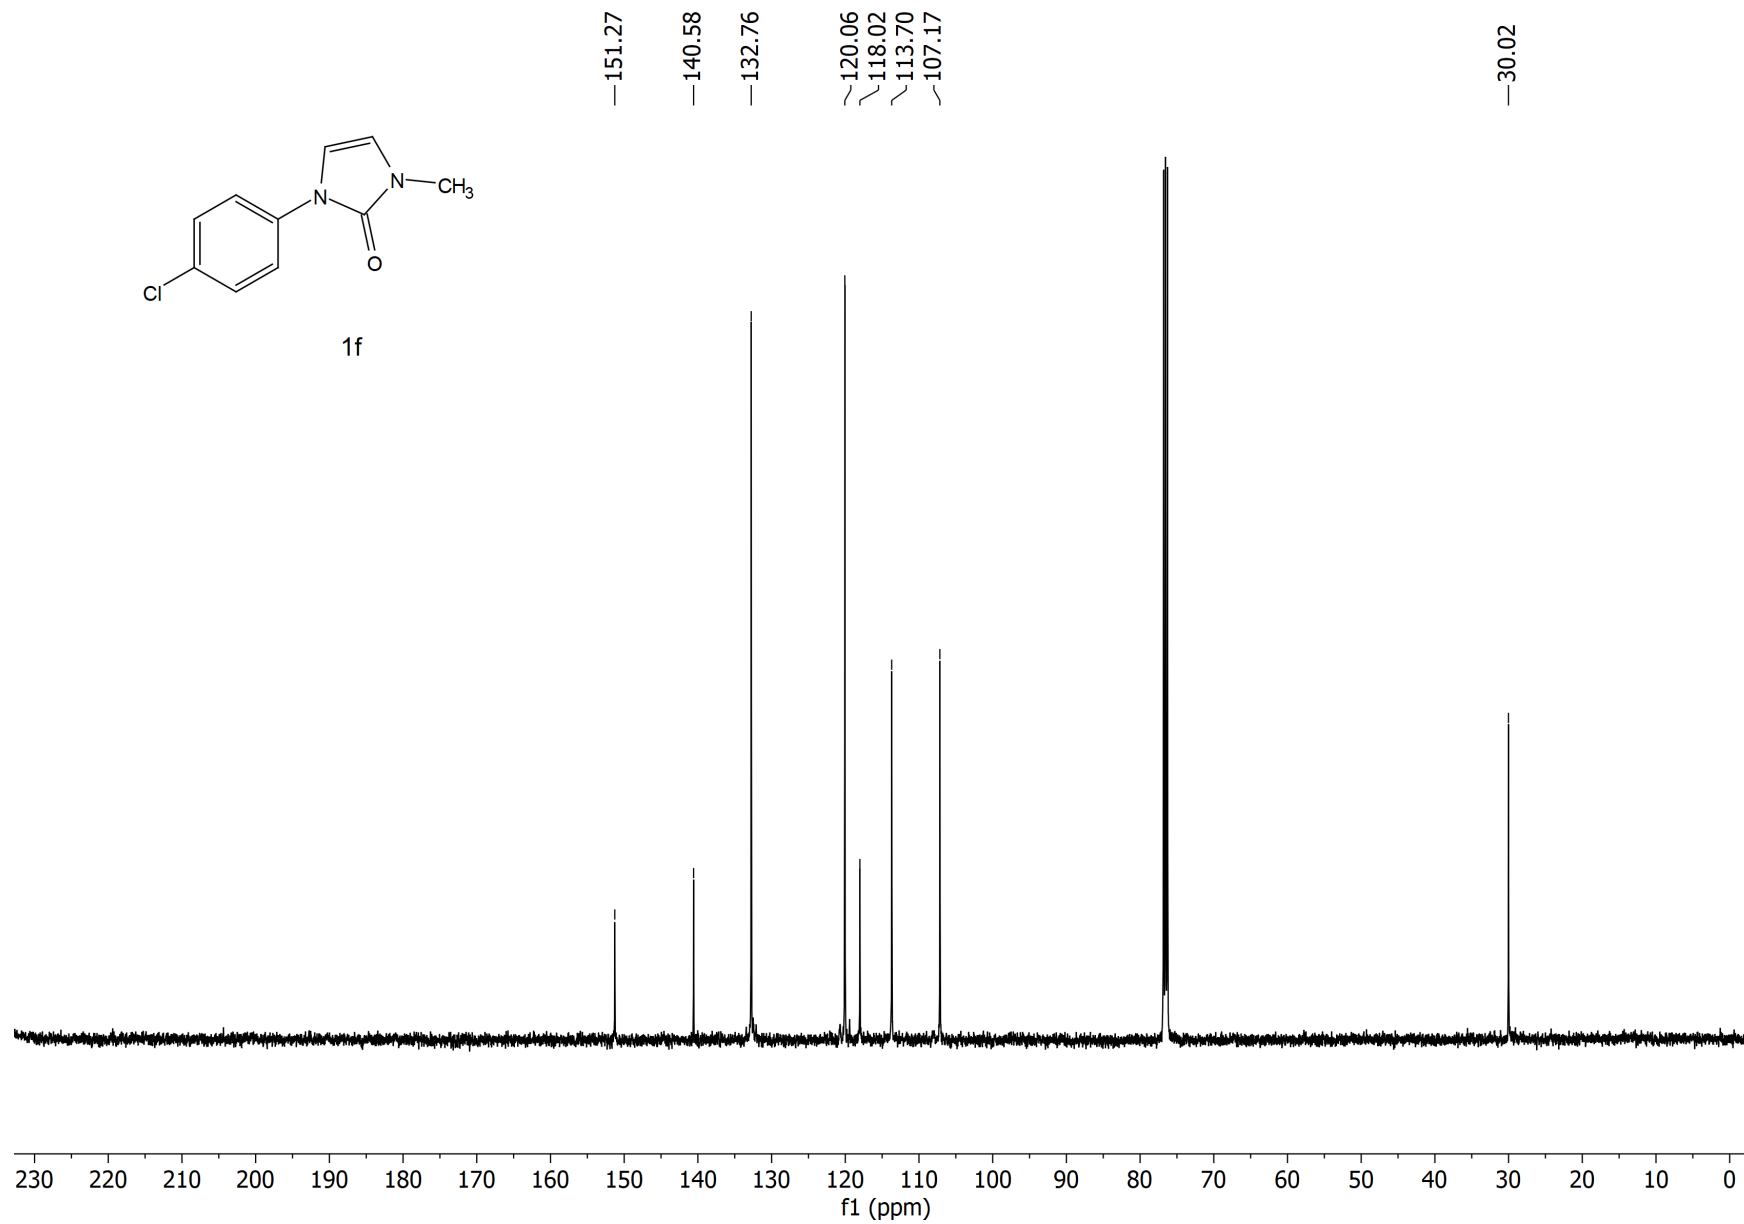

Figure S11.  $^{13}\text{C}$  NMR spectrum (CDCl<sub>3</sub>, 126MHz) of the compound **1f**

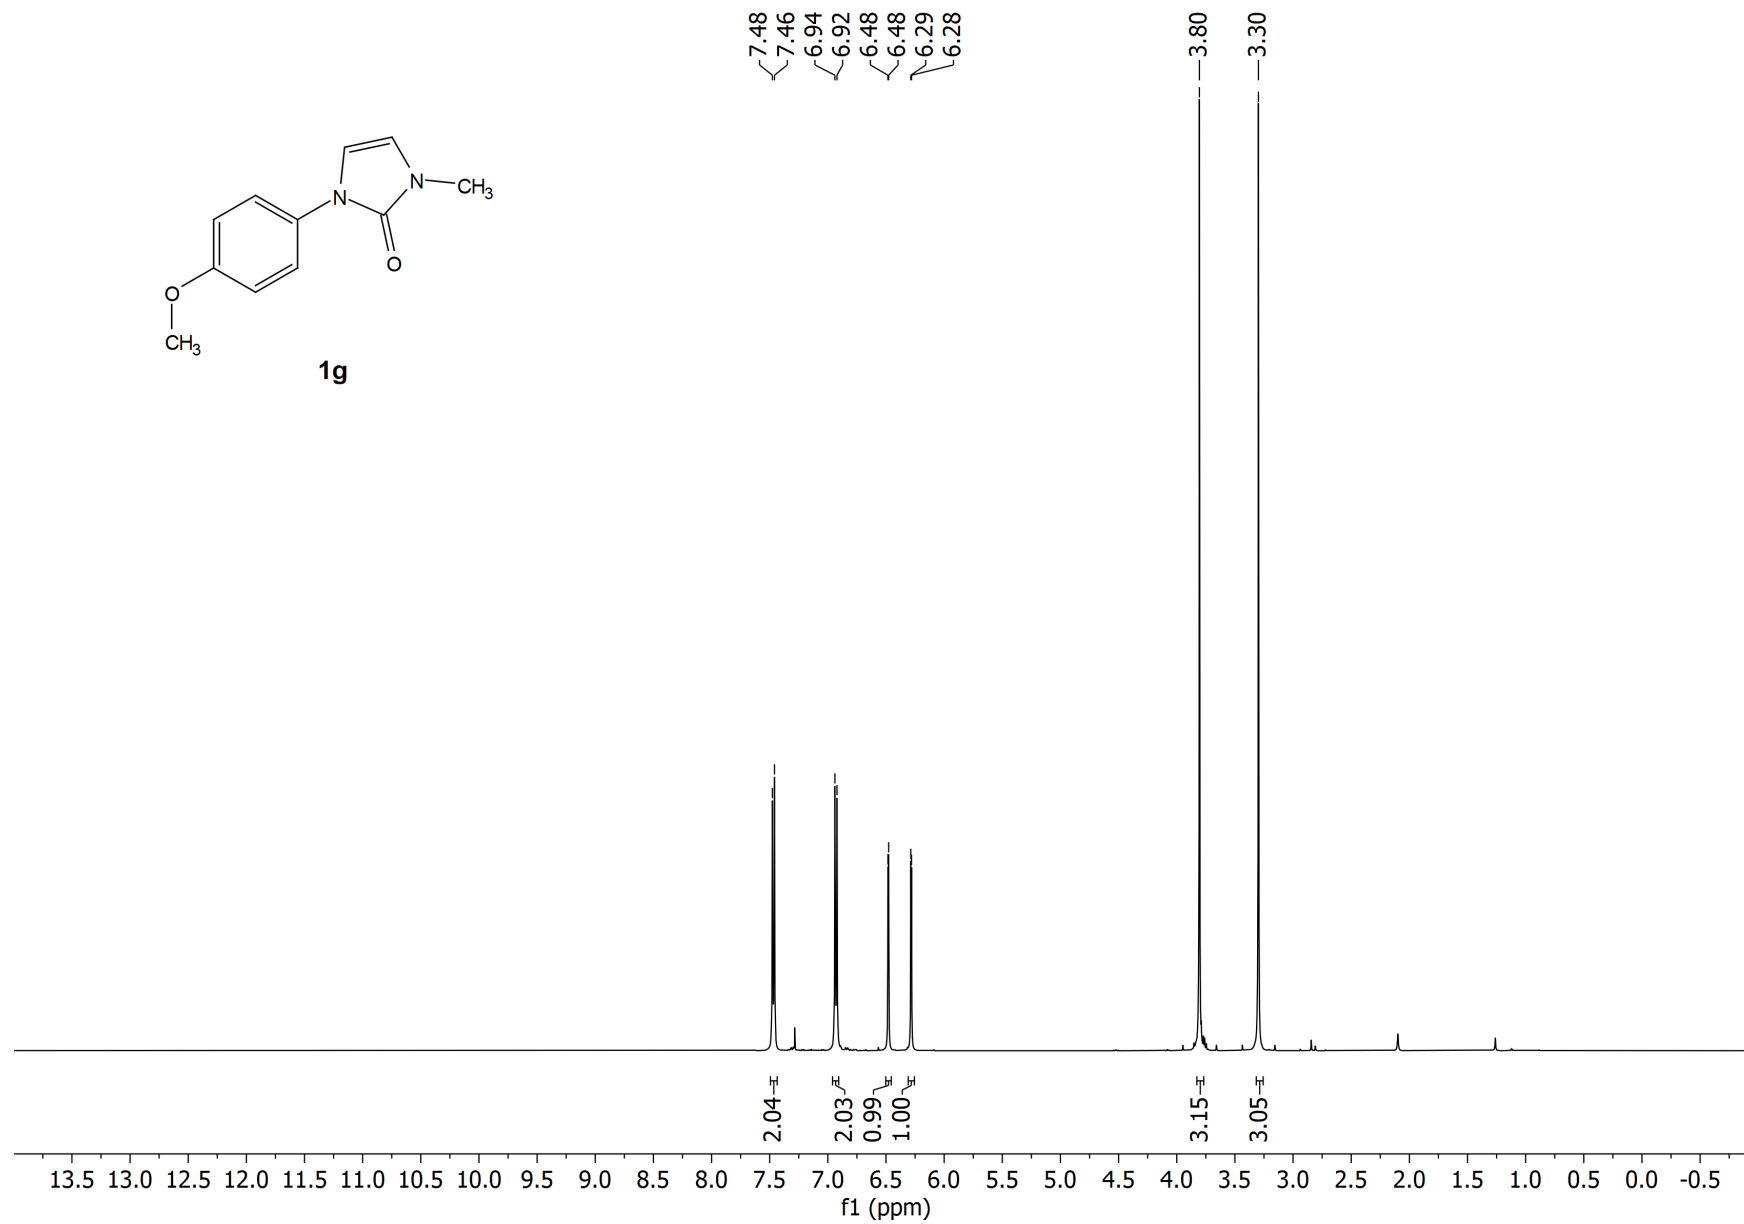

Figure S12. <sup>1</sup>H NMR spectrum (CDCl<sub>3</sub>, 400MHz) of the compound **1g**

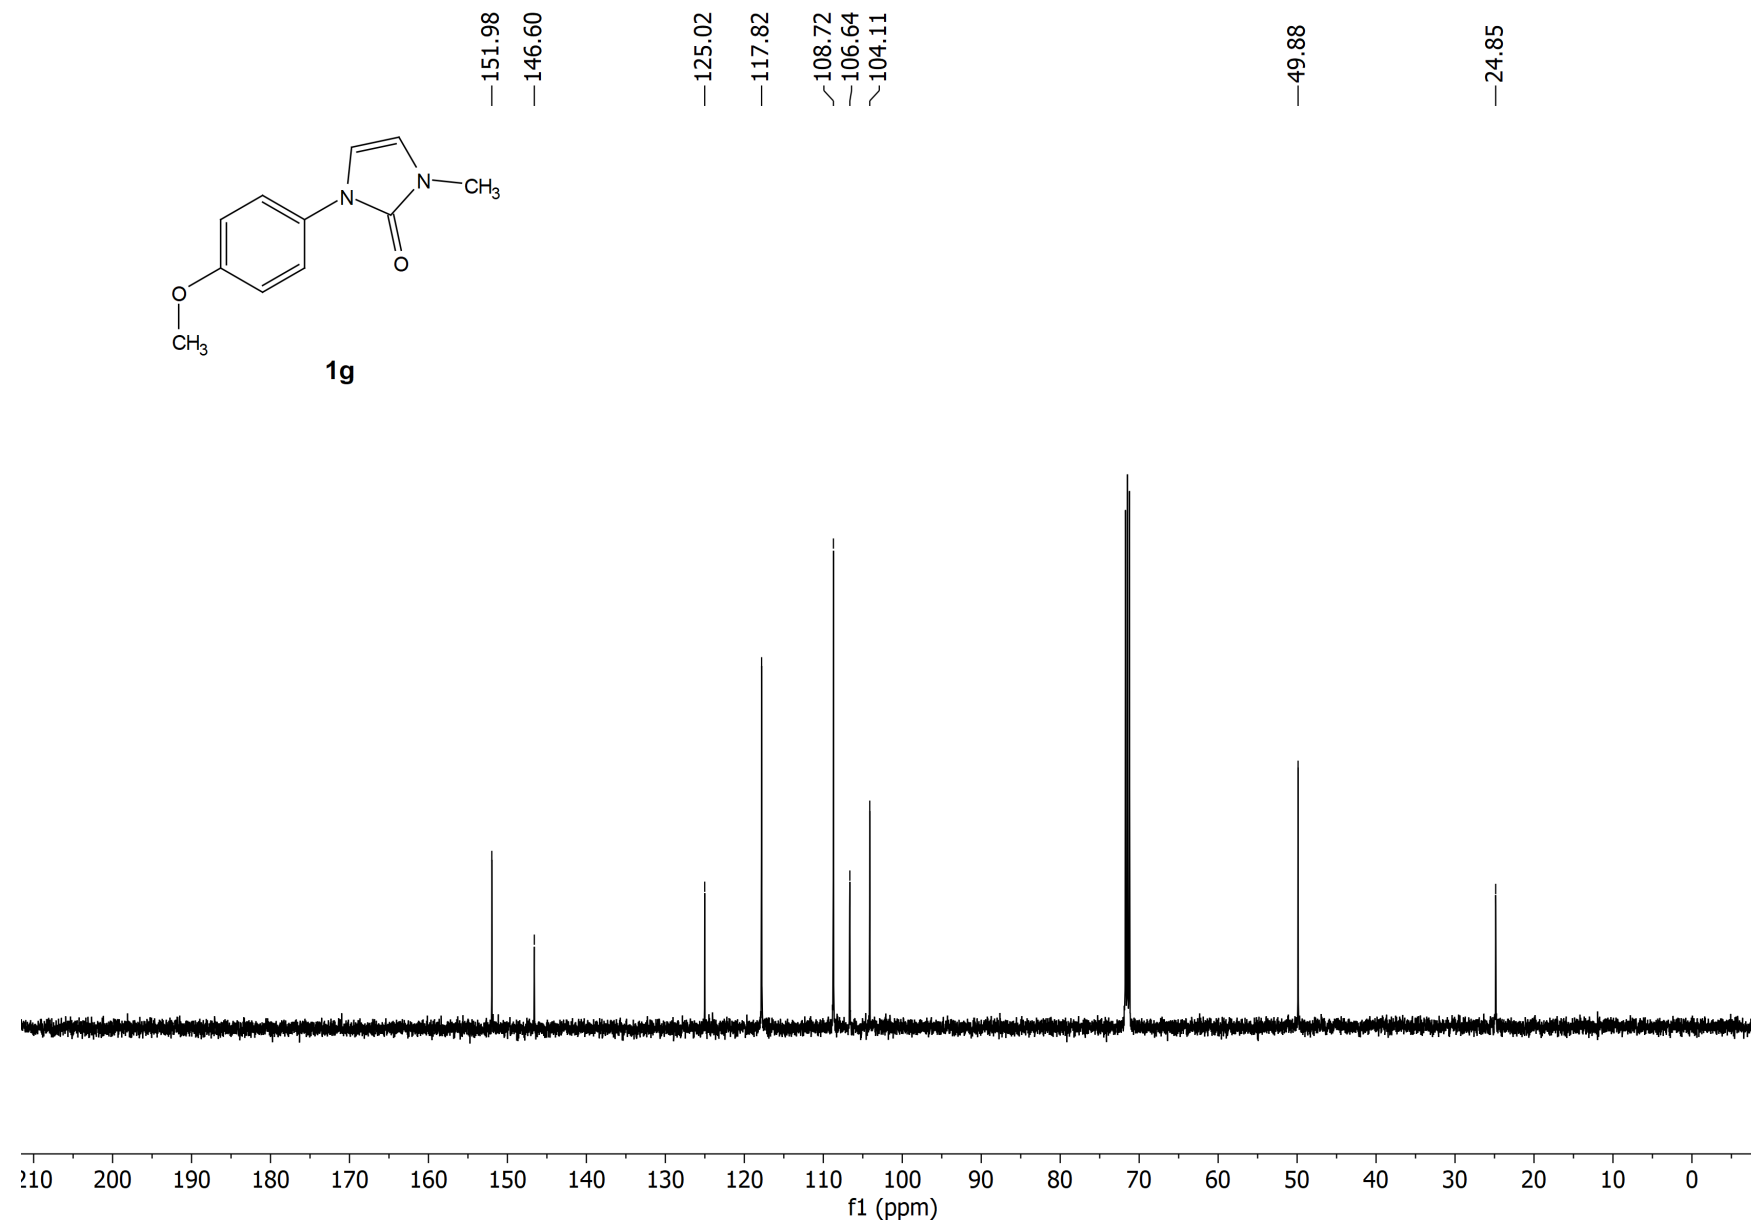

Figure S13.  $^{13}\text{C}$  NMR spectrum ( $\text{CDCl}_3$ , 126MHz) of the compound **1g**

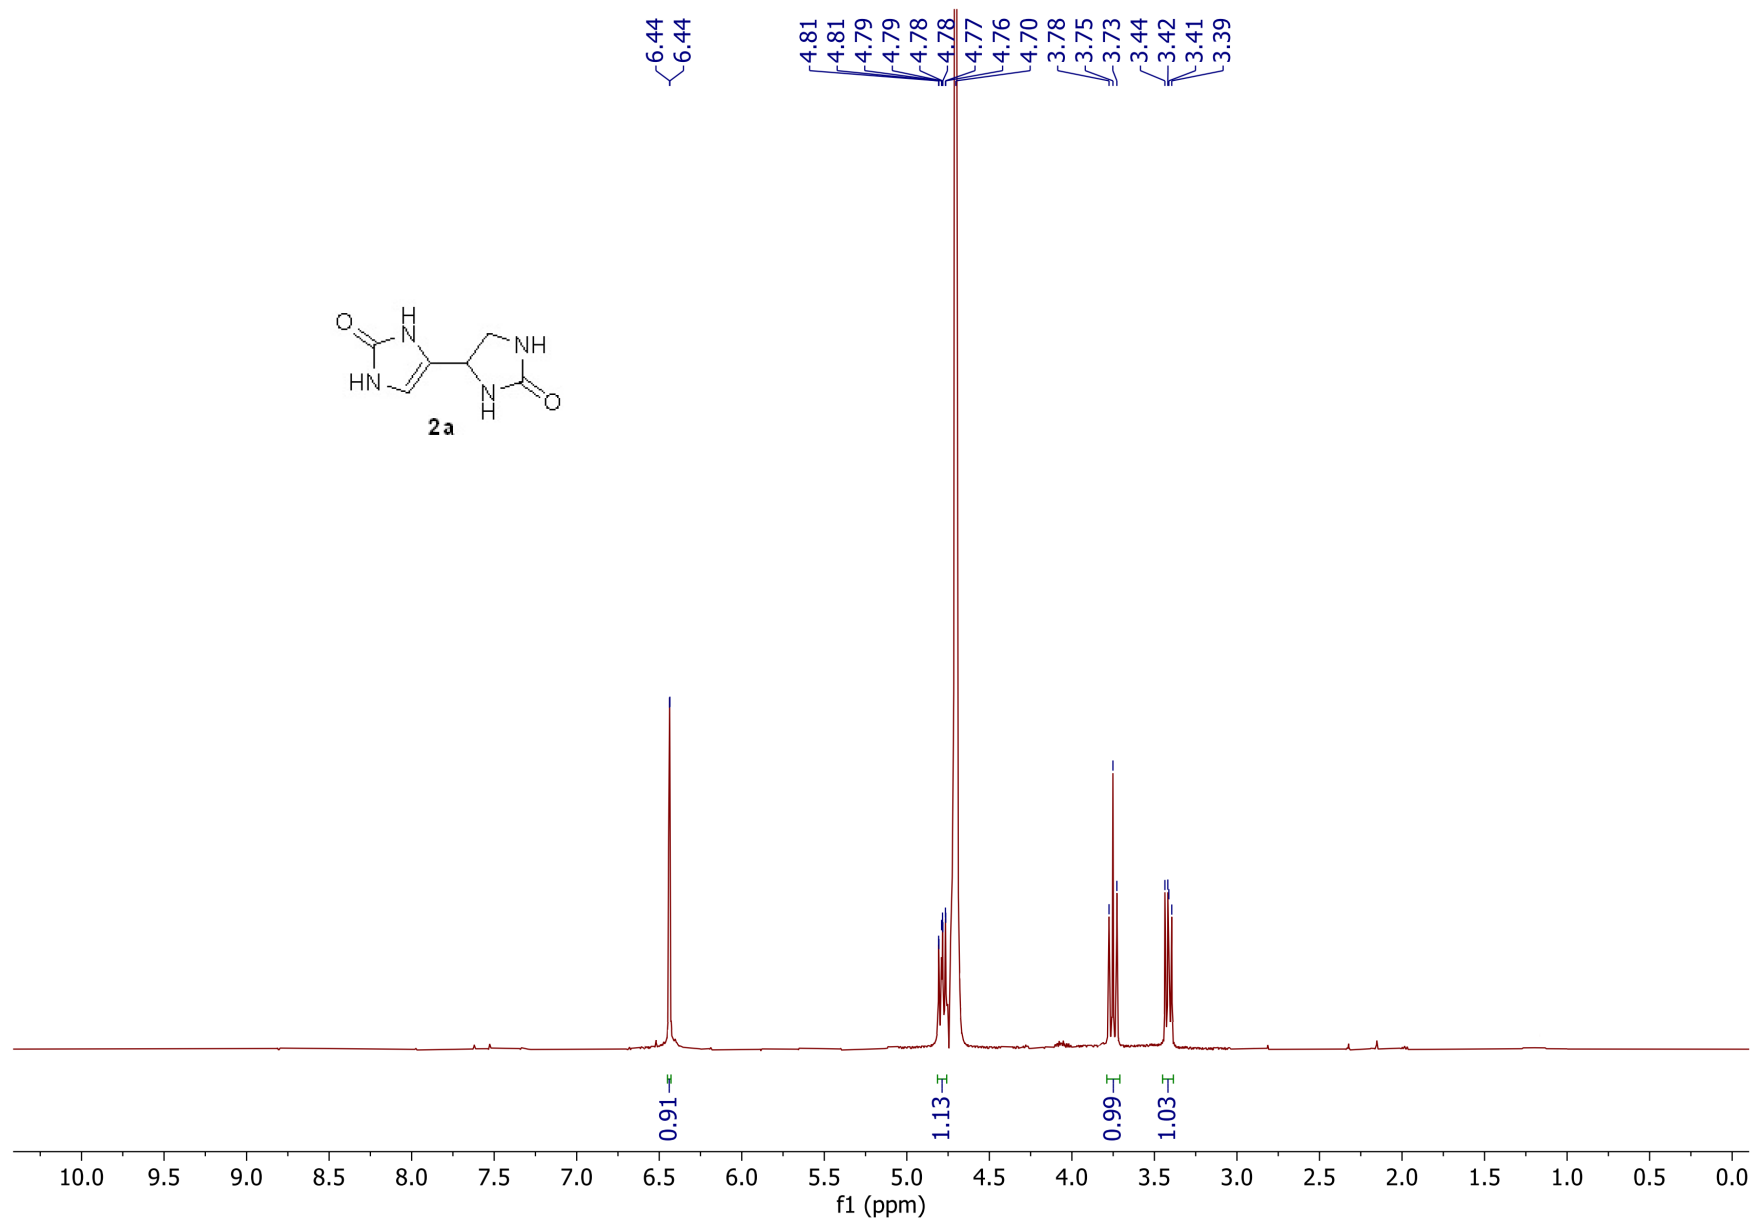

Figure S14.  $^1\text{H}$  NMR spectrum (D<sub>2</sub>O, 400MHz) of the compound **2a**

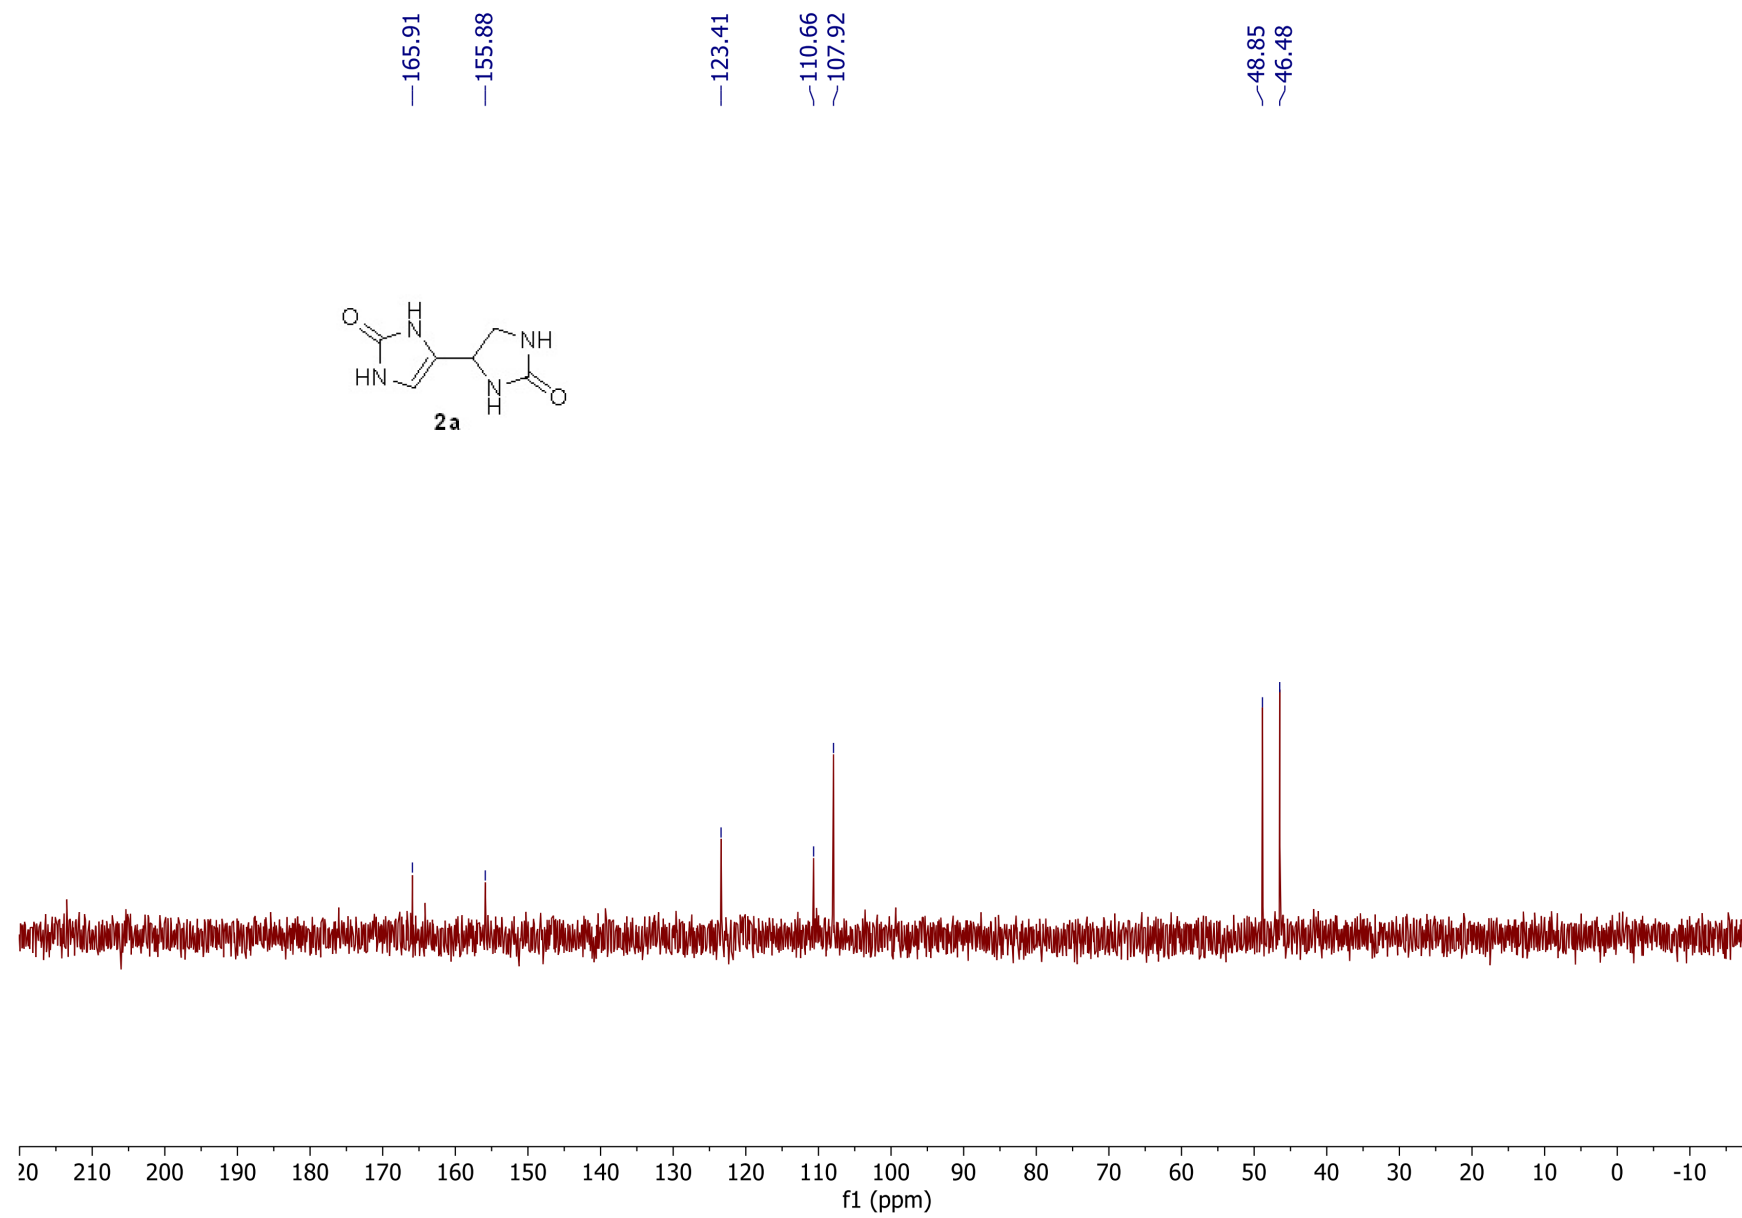

Figure S15.  $^{13}\text{C}$  NMR spectrum ( $\text{D}_2\text{O}$ , 126MHz) of the compound **2a**

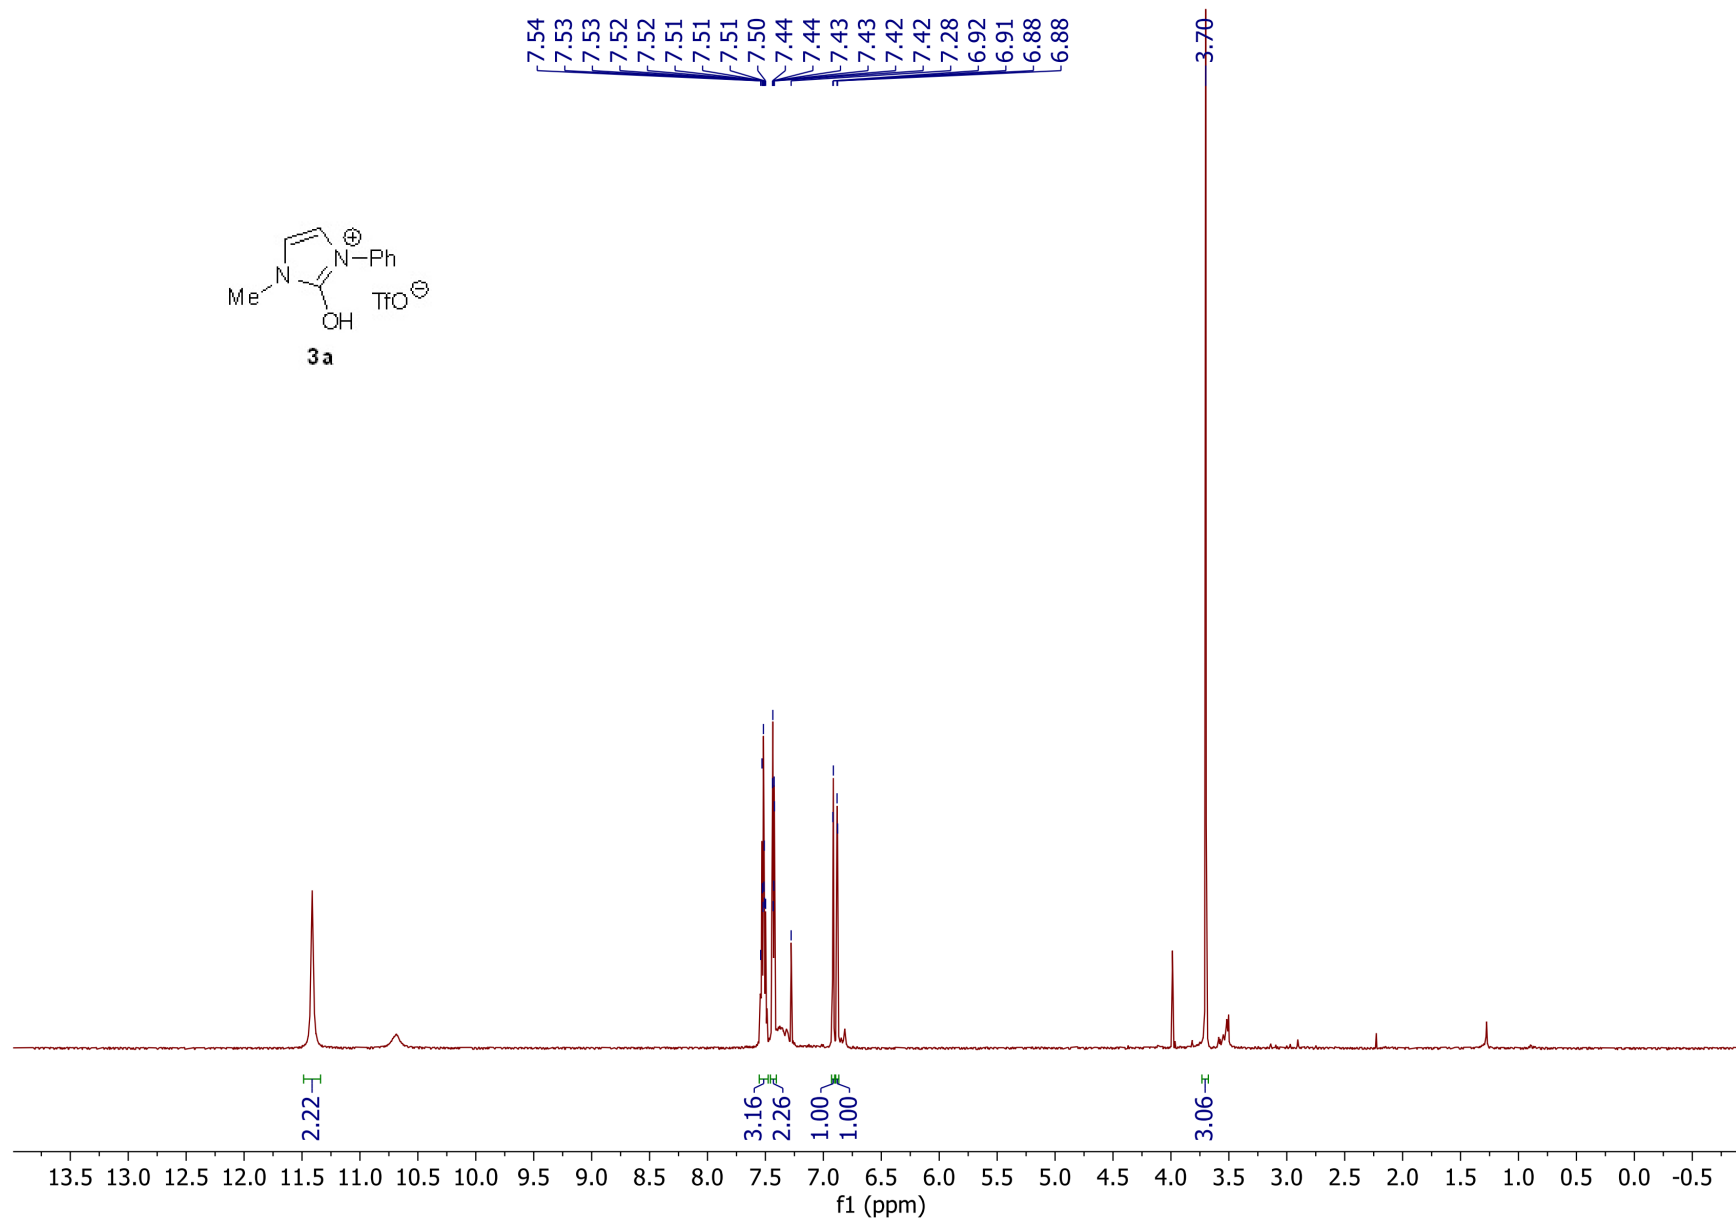

Figure S16. <sup>1</sup>H NMR spectrum (CDCl<sub>3</sub>, 400MHz) of the compound **3a**

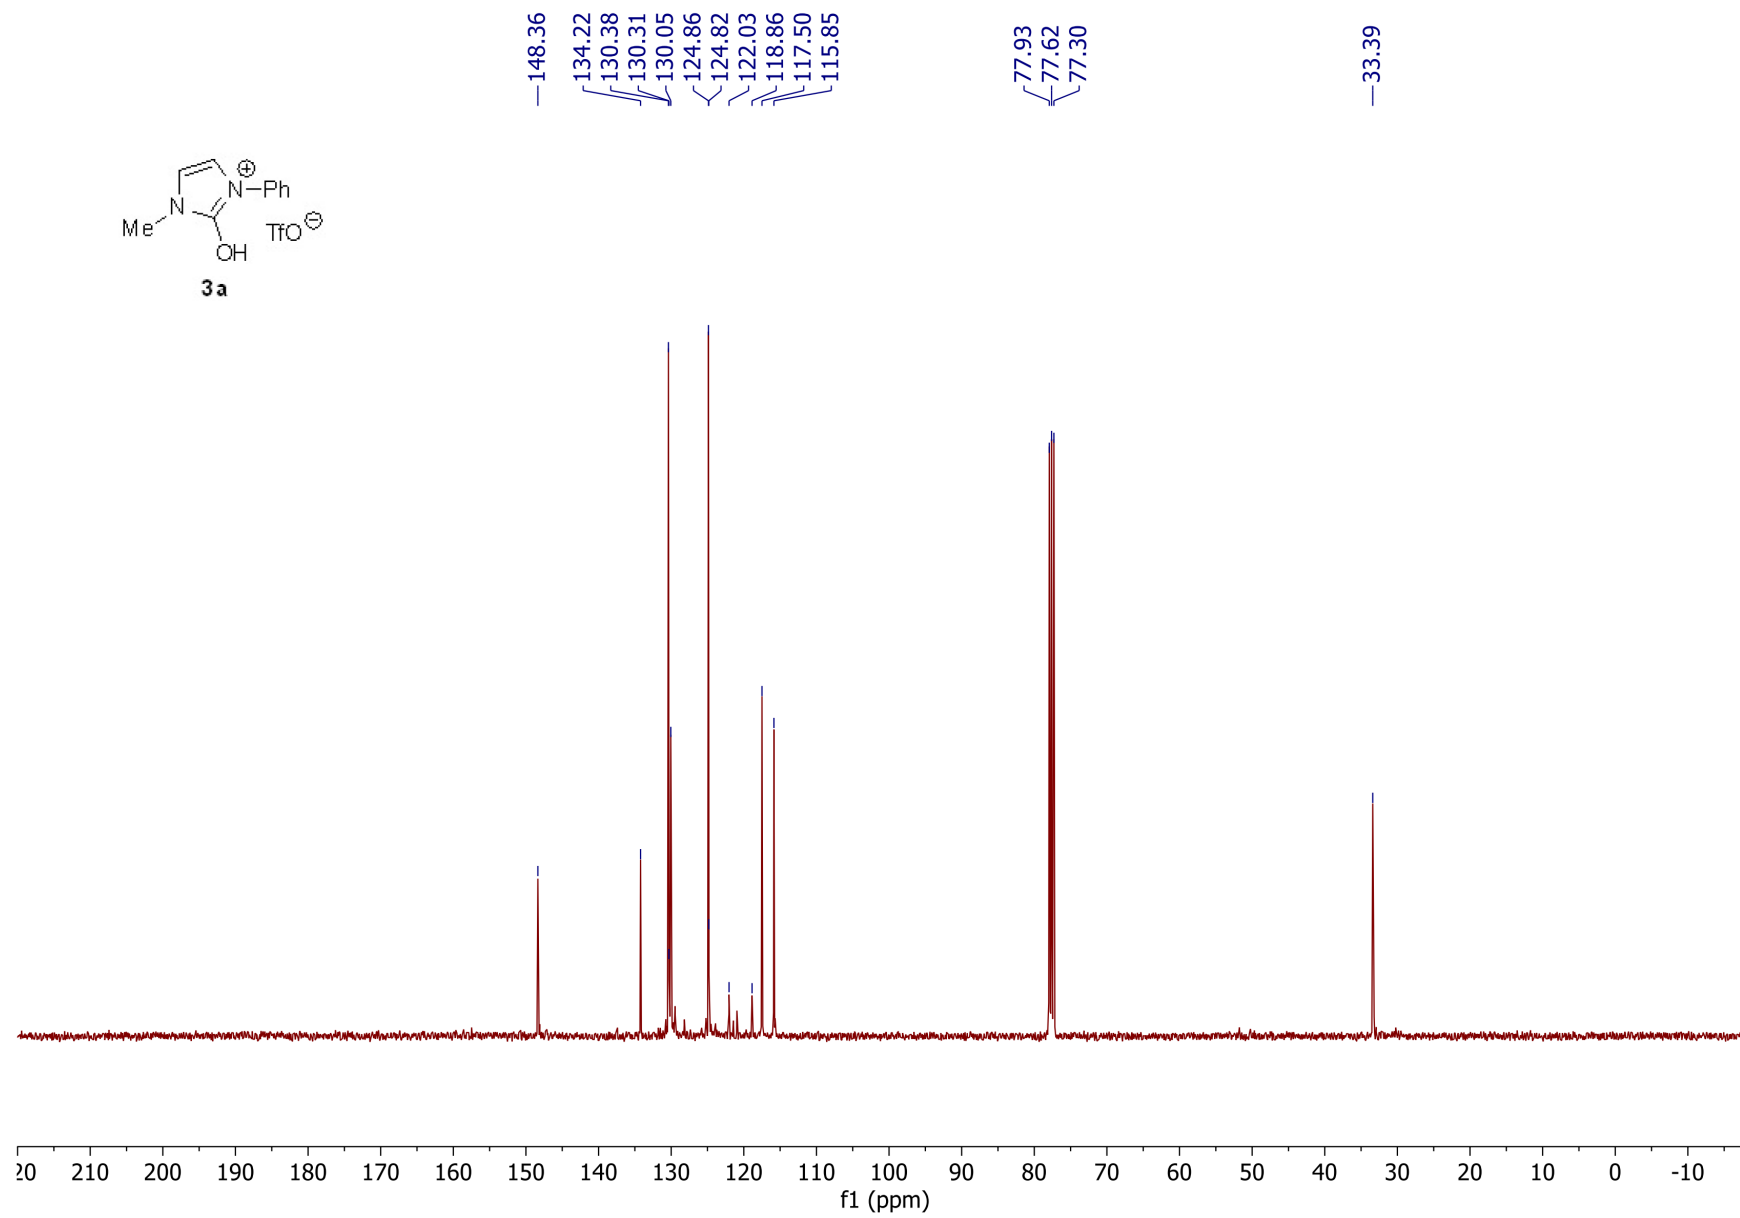

Figure S17. <sup>13</sup>C NMR spectrum (CDCl<sub>3</sub>, 126MHz) of the compound **3a**



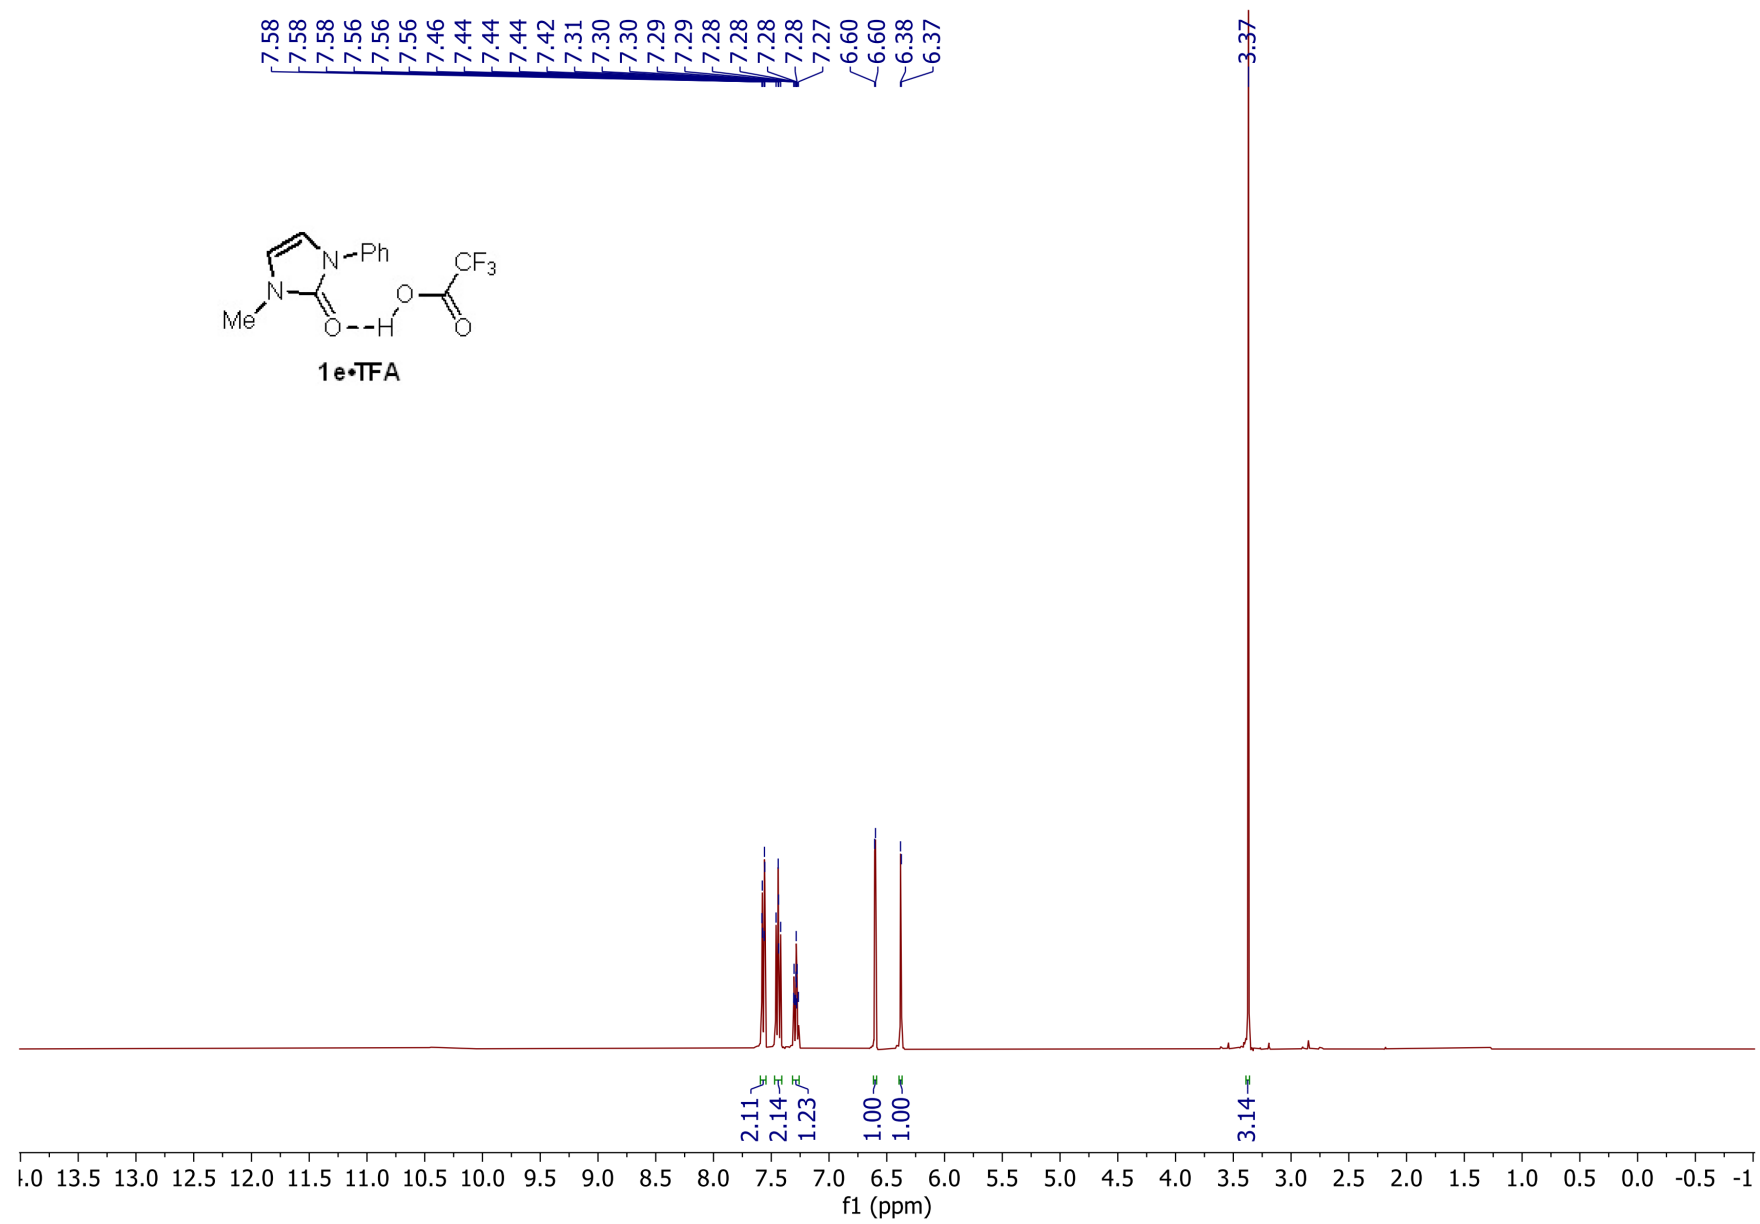

Figure S18. <sup>1</sup>H NMR spectrum (CDCl<sub>3</sub>, 400MHz) of the compound **3b** (**1e•TFA**)

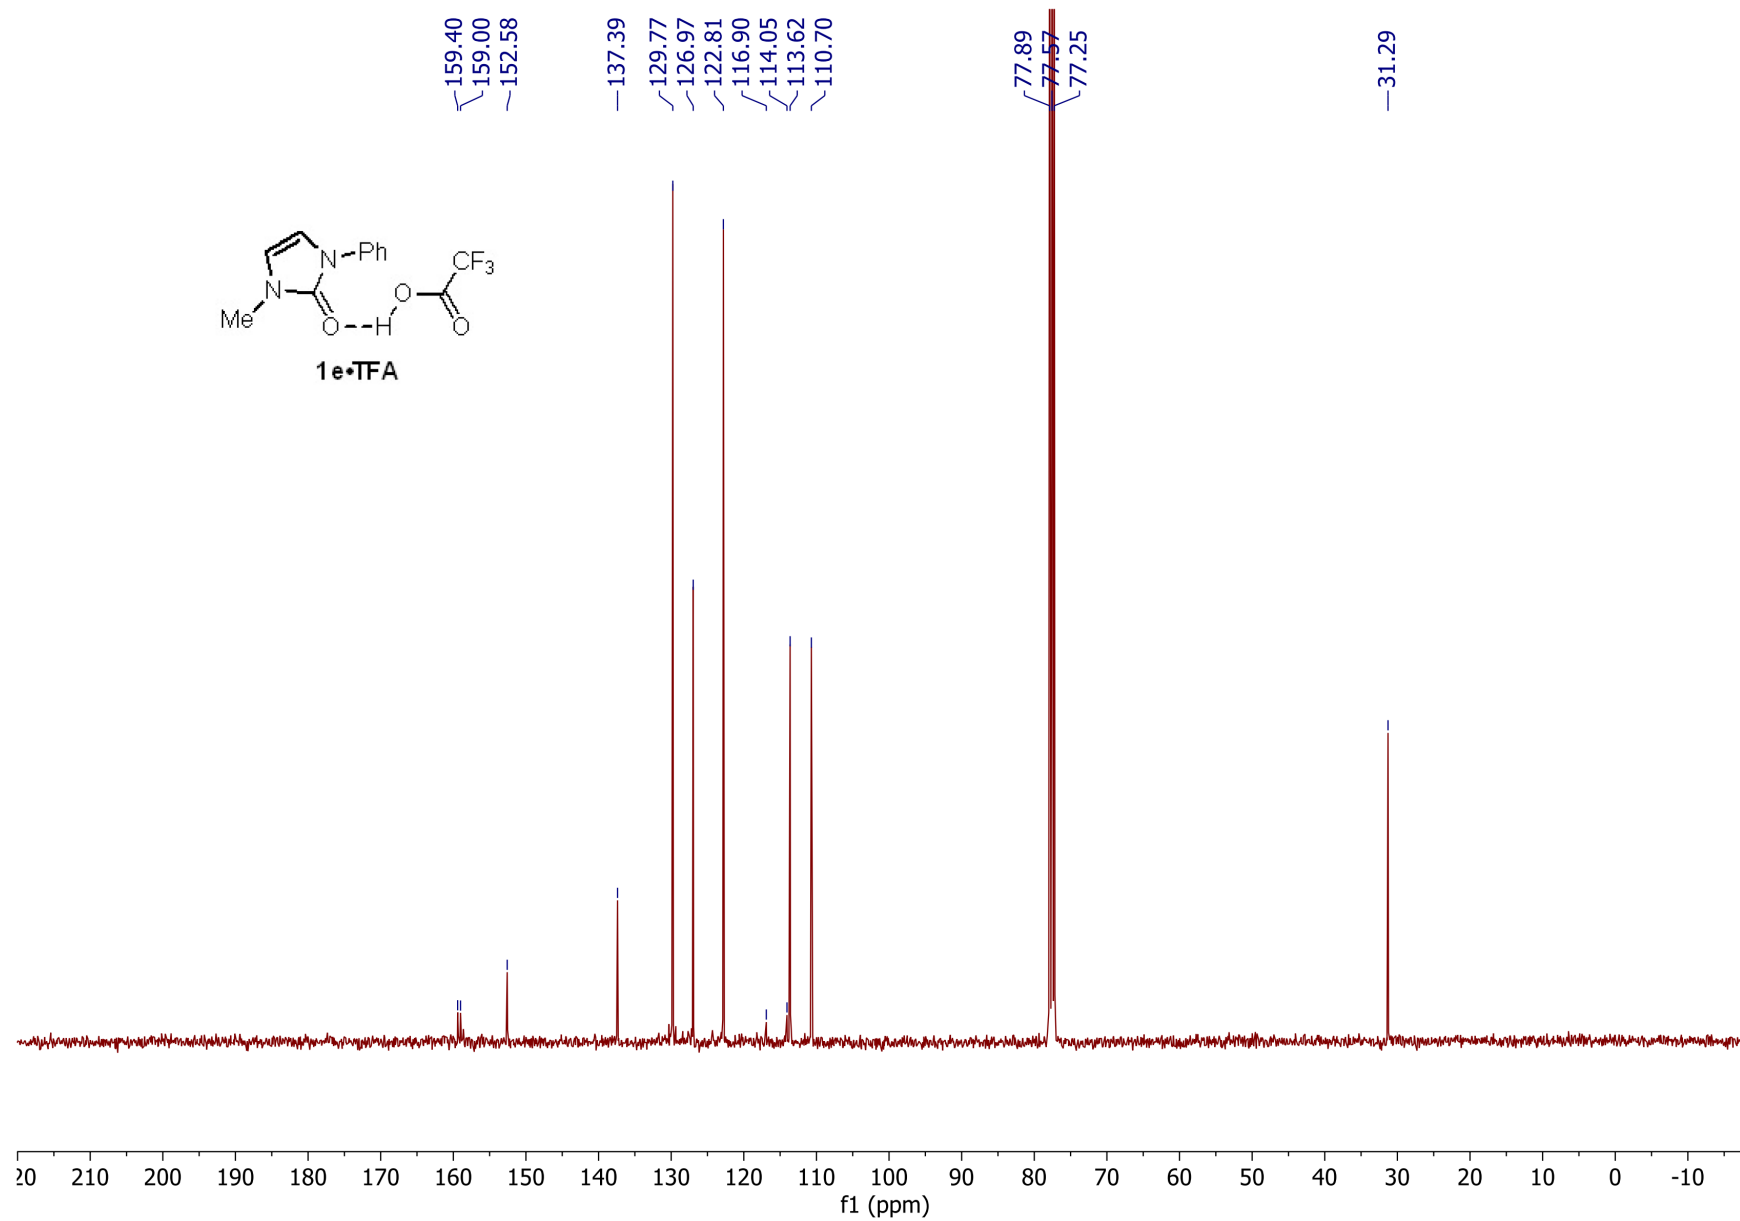

Figure S19.  $^{13}\text{C}$  NMR spectrum (CDCl<sub>3</sub>, 126MHz) of the compound **3b** (**1e•TFA**)

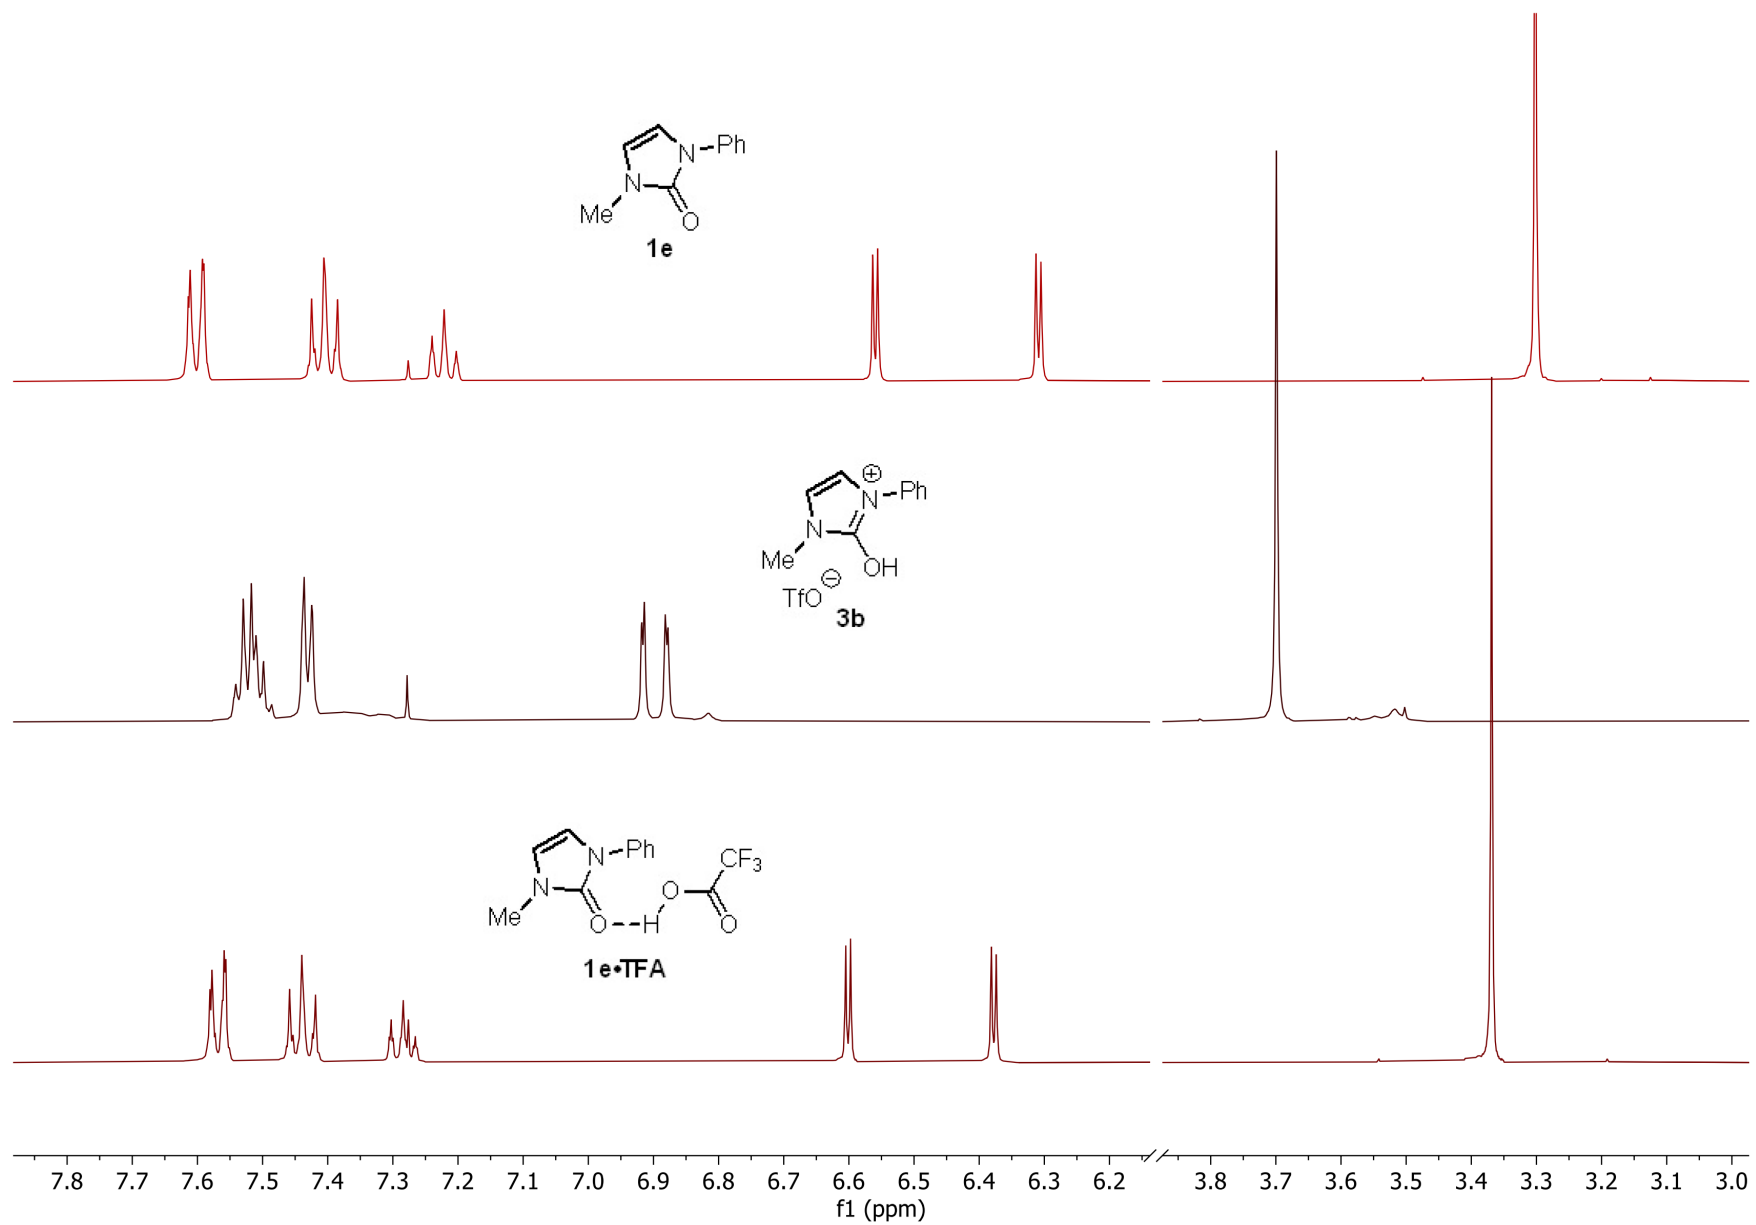

Figure S20. Comparison of <sup>1</sup>H NMR spectra (CDCl<sub>3</sub>, 400MHz) of the compounds **1e**, **3a** and **3b (1e·TFA)**

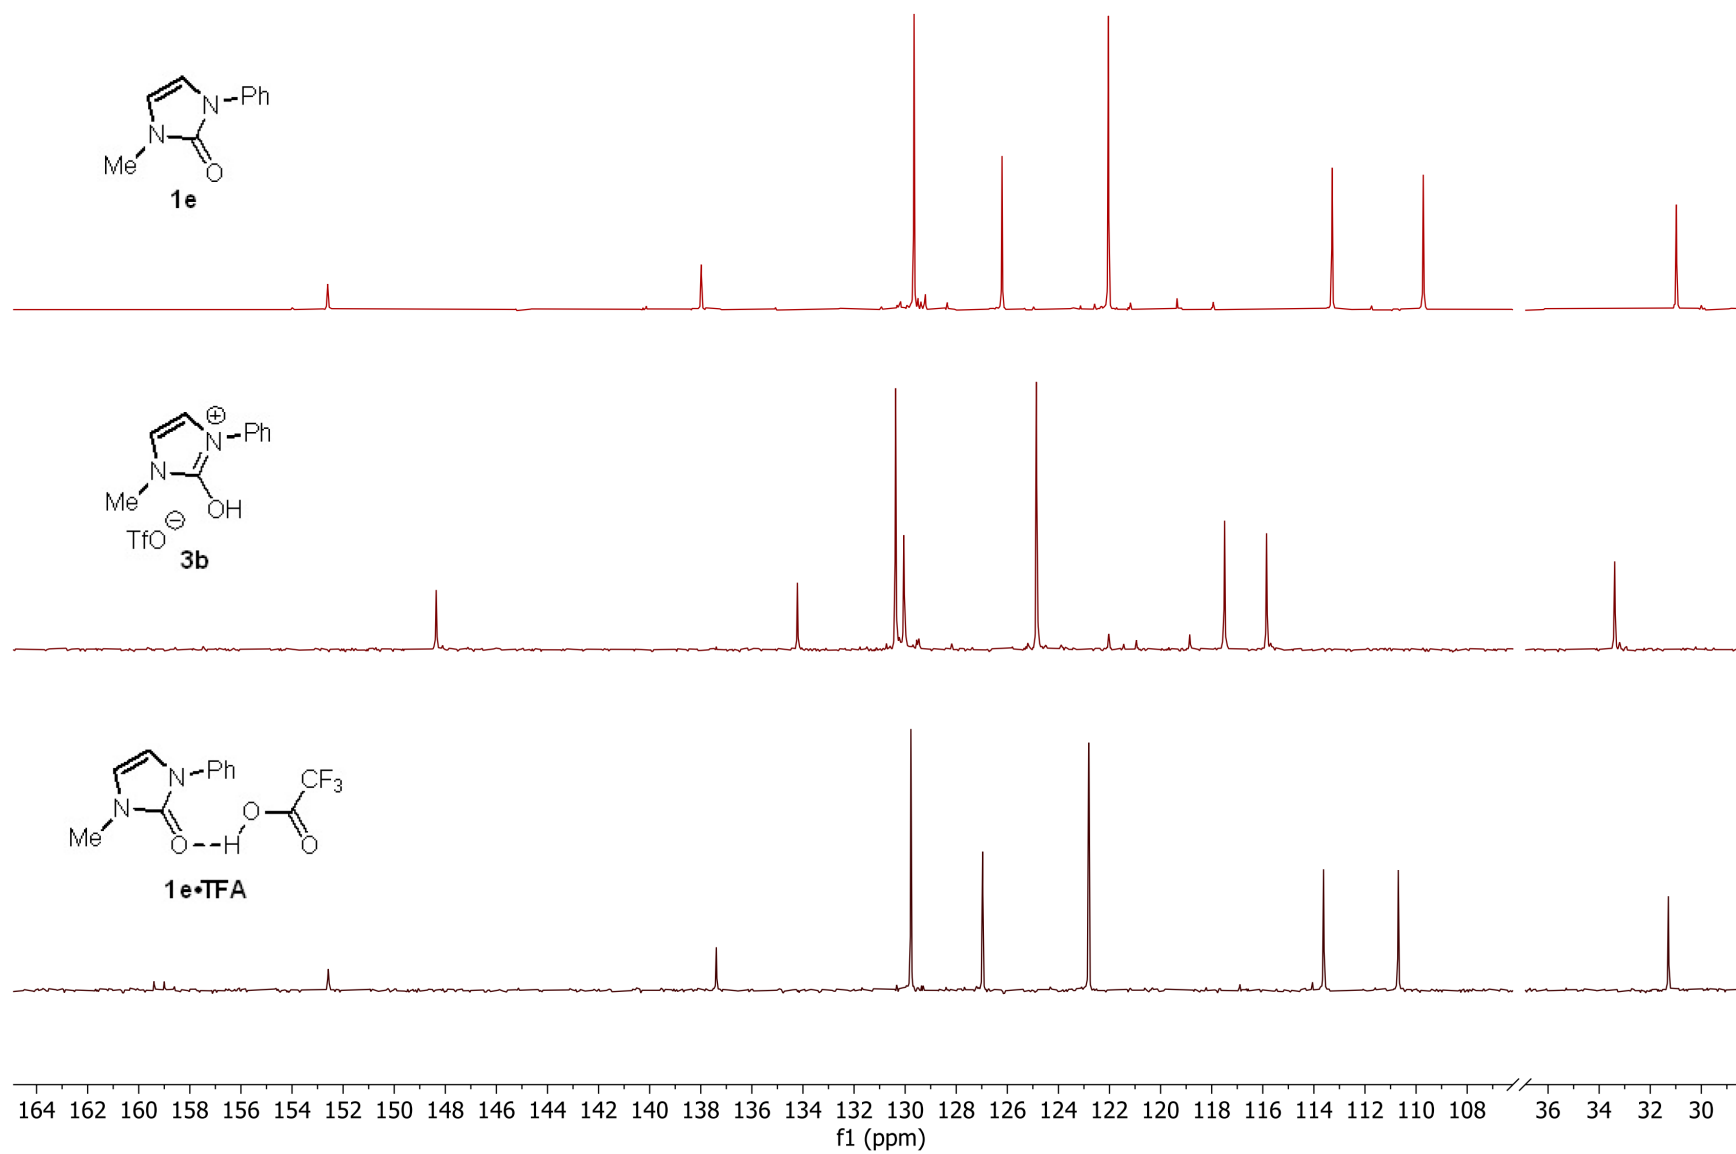

Figure S21. Comparison of <sup>13</sup>C NMR spectra (CDCl<sub>3</sub>, 400MHz) of the compounds **1a**, **3a** and **3b** (**1e**•TFA)

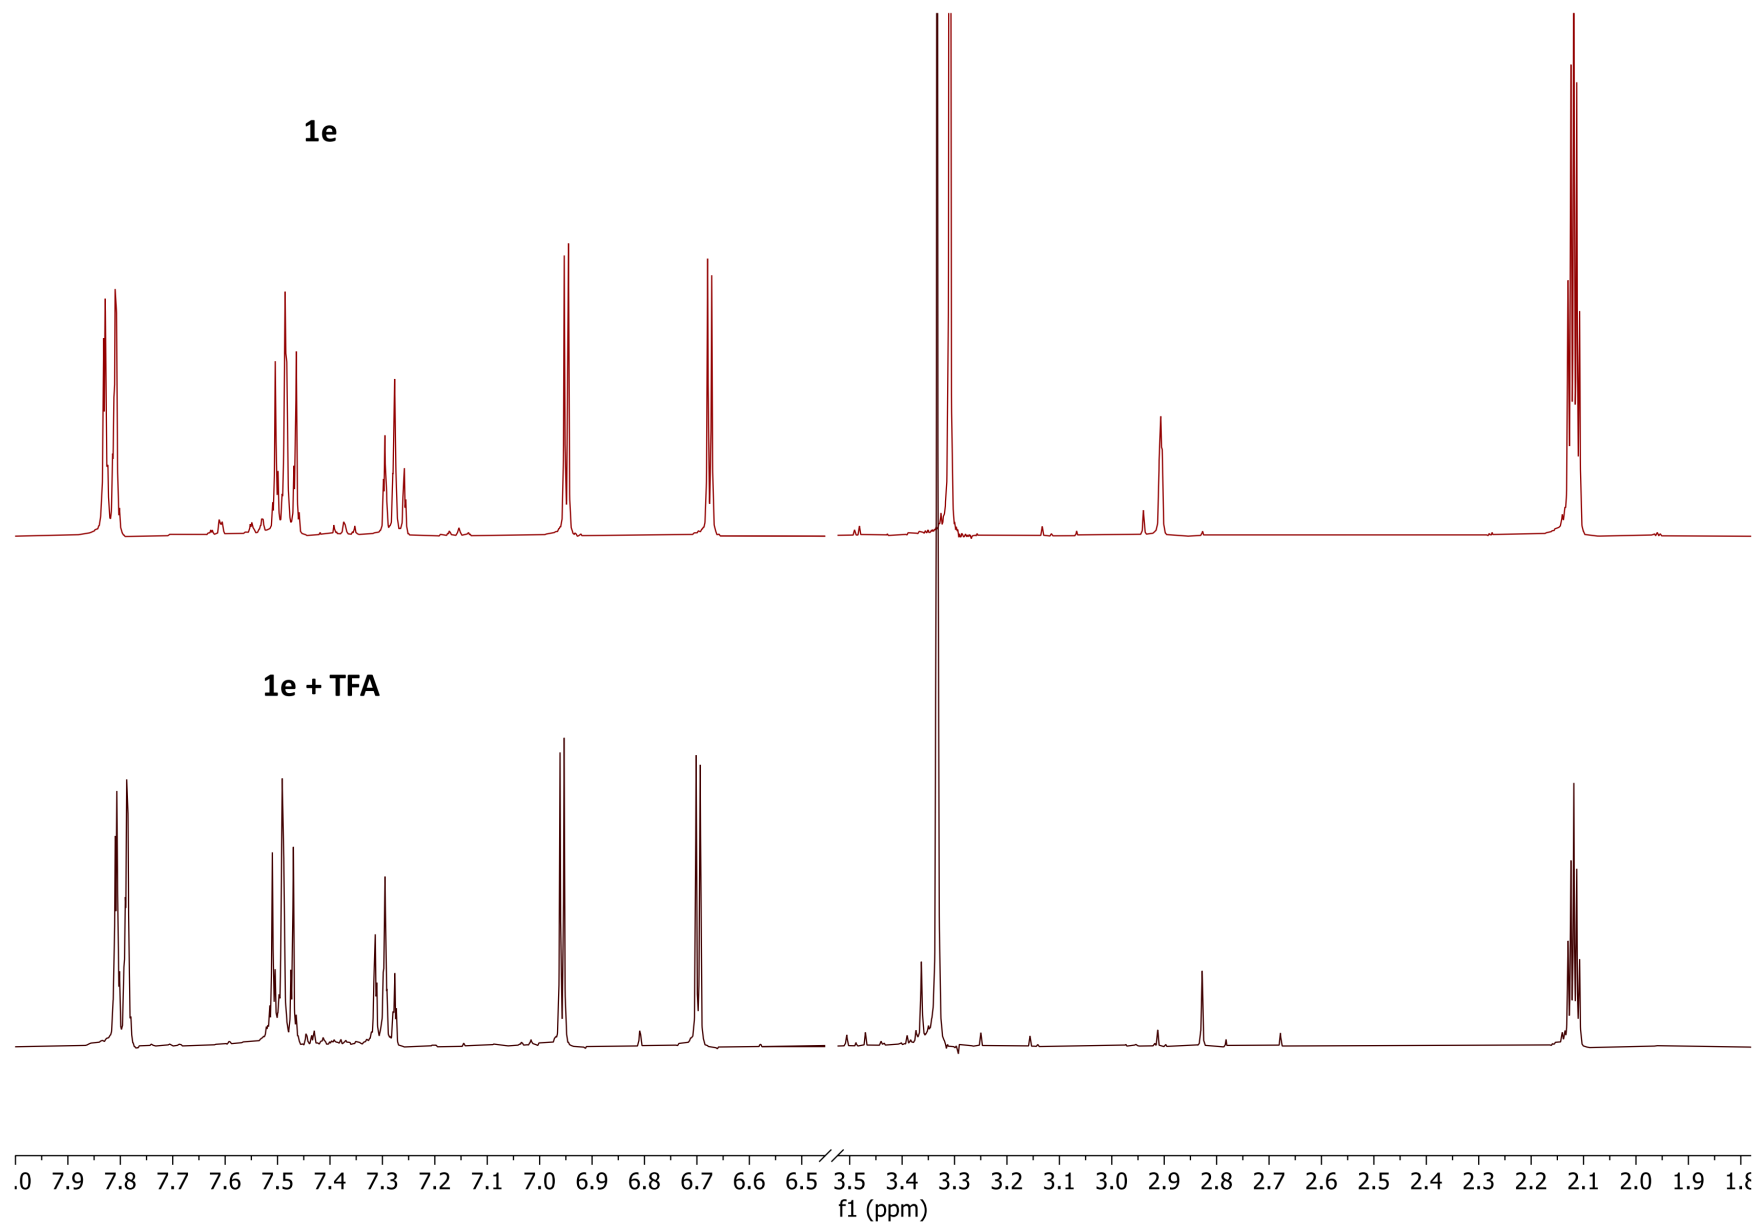

**Figure S22.** <sup>1</sup>H NMR spectra of the compound **1e** (upper) and of the compound **1e** in the presence of 1 equivalent of TFA (lower),  $(\text{CD}_3)_2\text{CO}$ , 400MHz)

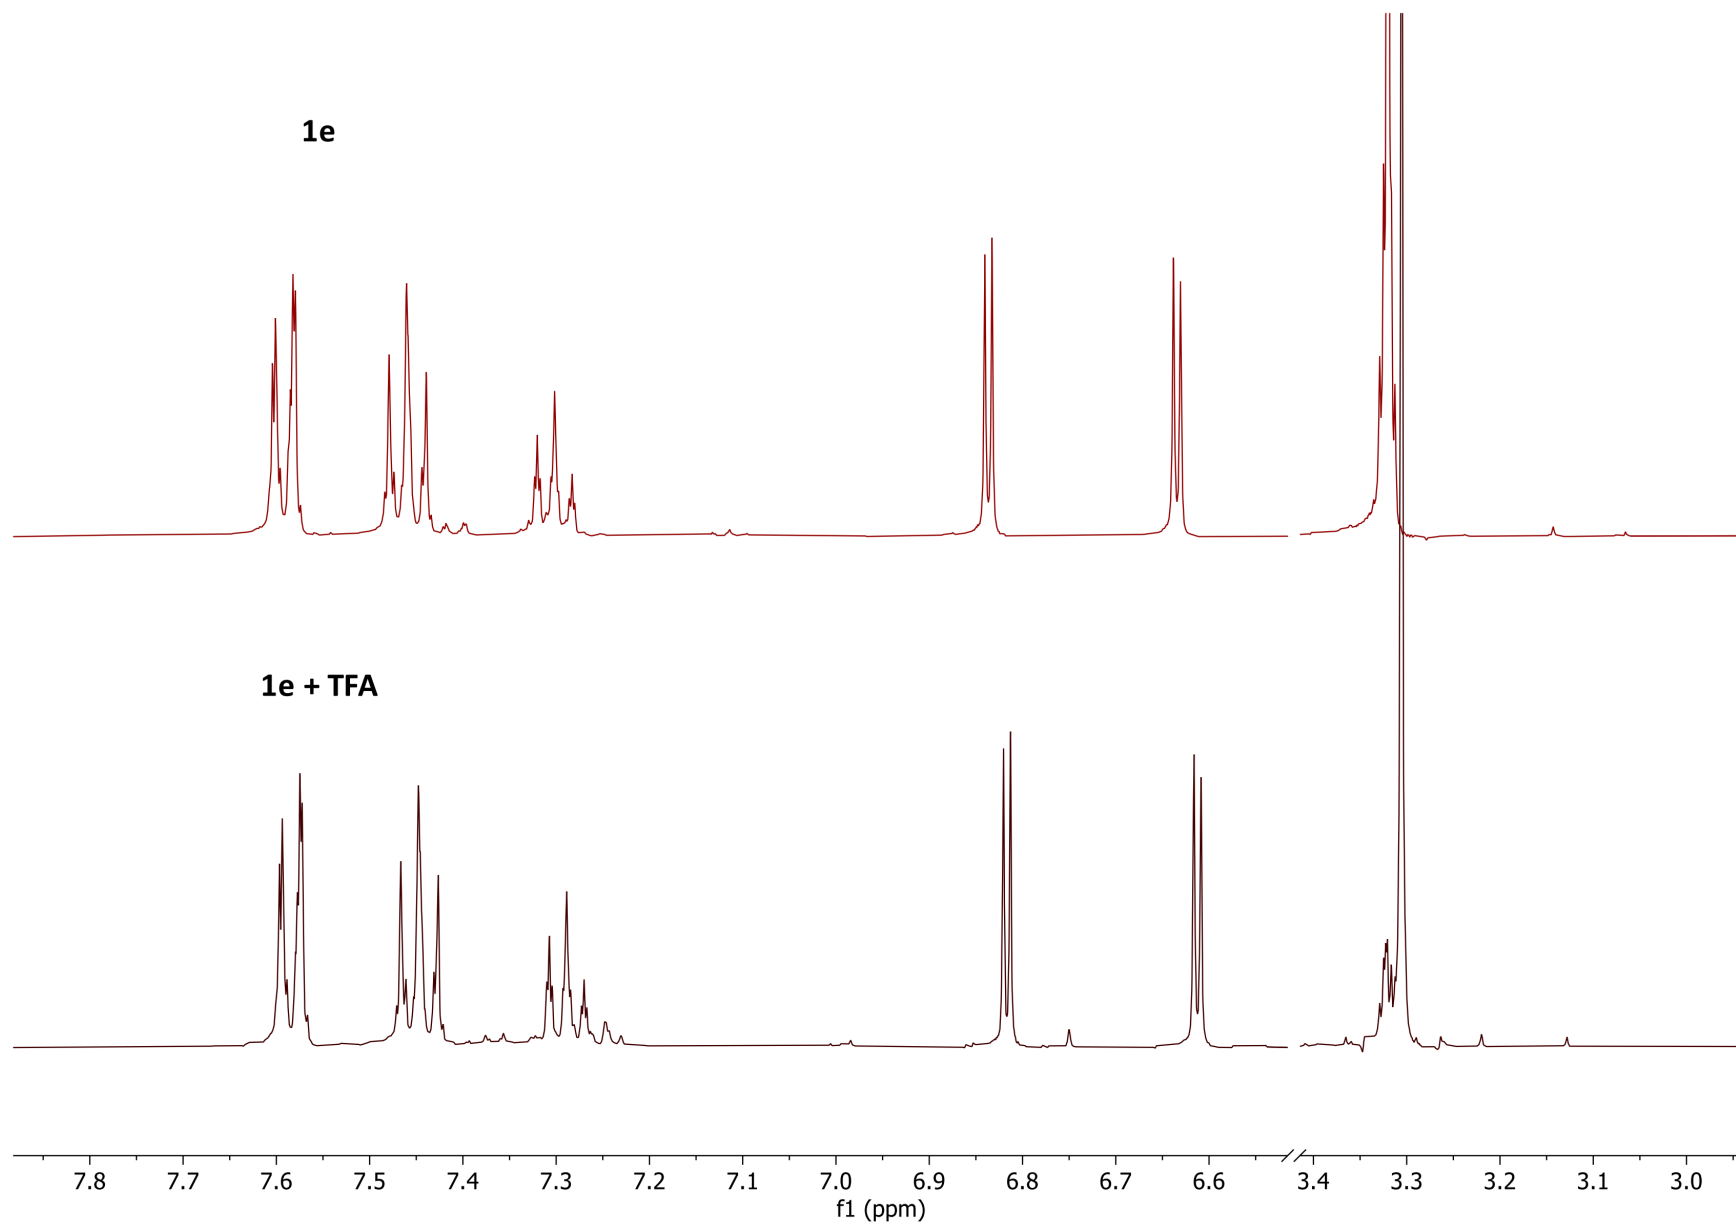

Figure S23. <sup>1</sup>H NMR spectra of the compound **1e** (upper) and of the compound **1e** in the presence of 1 equivalent of TFA (lower), (CD<sub>3</sub>OD, 400MHz)

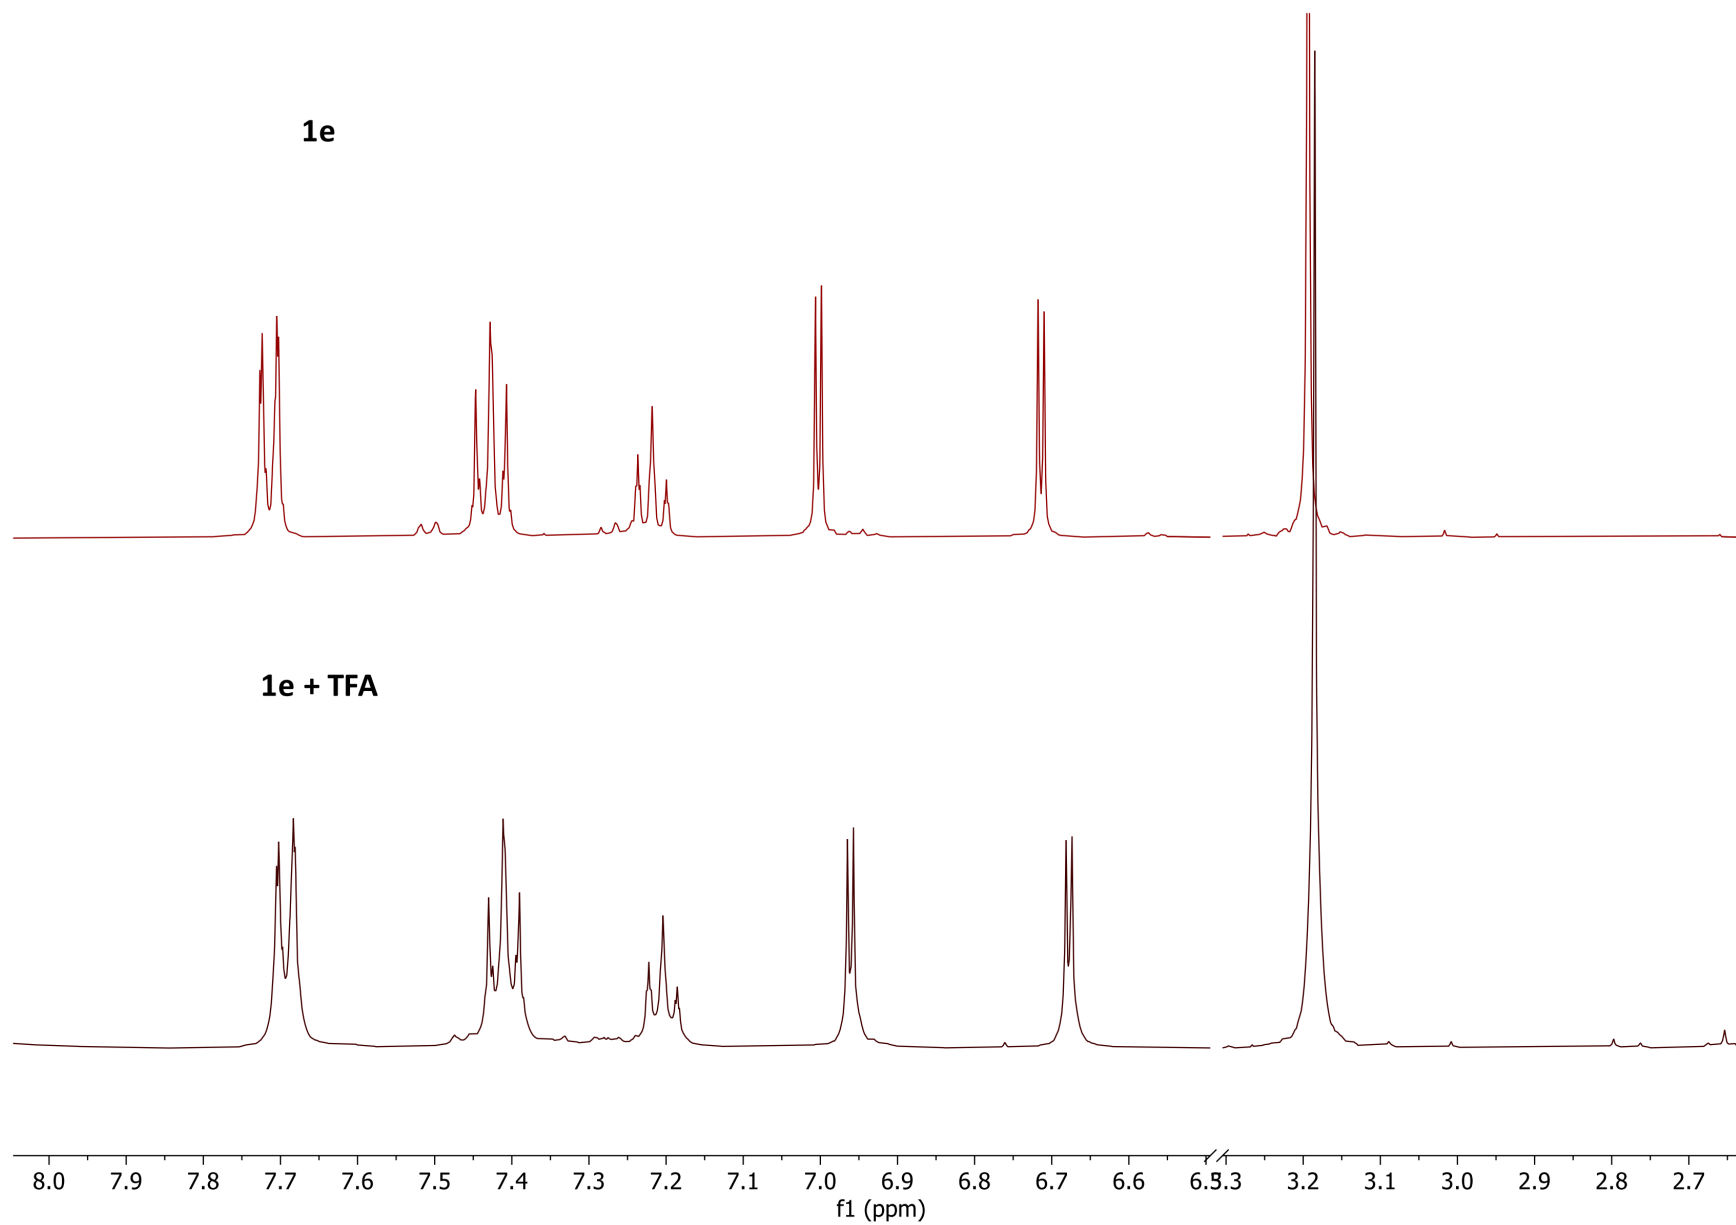

**Figure S24.** <sup>1</sup>H NMR spectra of the compound **1e** (upper) and of the compound **1e** in the presence of 1 equivalent of TFA (lower), ((CD<sub>3</sub>)<sub>2</sub>SO, 400MHz)

## Coordinates of stationary points for studied compounds

| IMIDAZOLES 1a-e and 2-HYDROXYIMIDAZOLES 1a',b'd', B3PW91/def2-TZVPD // PBE/def2-TZVPD                                                              |                                                                                                                                                                                                                                                                                                                                                                                                                                                                                                                                                                                                                                                                                                                                                                                                                                                                                                                                                                                                  |          |          |   |          |         |          |   |         |         |          |   |          |         |          |   |          |         |         |   |          |         |          |   |          |         |          |   |          |         |          |   |          |          |          |   |          |          |          |   |          |          |          |   |          |         |          |   |          |         |          |   |          |         |         |
|----------------------------------------------------------------------------------------------------------------------------------------------------|--------------------------------------------------------------------------------------------------------------------------------------------------------------------------------------------------------------------------------------------------------------------------------------------------------------------------------------------------------------------------------------------------------------------------------------------------------------------------------------------------------------------------------------------------------------------------------------------------------------------------------------------------------------------------------------------------------------------------------------------------------------------------------------------------------------------------------------------------------------------------------------------------------------------------------------------------------------------------------------------------|----------|----------|---|----------|---------|----------|---|---------|---------|----------|---|----------|---------|----------|---|----------|---------|---------|---|----------|---------|----------|---|----------|---------|----------|---|----------|---------|----------|---|----------|----------|----------|---|----------|----------|----------|---|----------|----------|----------|---|----------|---------|----------|---|----------|---------|----------|---|----------|---------|---------|
| <p>Molecule: <b>1a</b></p> 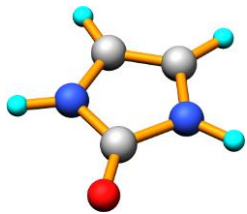 <p>Energy = -301.408770 Hartree</p>   | <p>10</p> <table border="1"> <tbody> <tr><td>C</td><td>-0.29819</td><td>1.71476</td><td>-0.02459</td></tr> <tr><td>O</td><td>0.86742</td><td>2.09506</td><td>-0.00362</td></tr> <tr><td>N</td><td>-1.46487</td><td>2.47773</td><td>-0.10316</td></tr> <tr><td>N</td><td>-0.79237</td><td>0.40982</td><td>0.02405</td></tr> <tr><td>C</td><td>-2.60230</td><td>1.67555</td><td>-0.10190</td></tr> <tr><td>C</td><td>-2.18316</td><td>0.38687</td><td>-0.02267</td></tr> <tr><td>H</td><td>-3.60482</td><td>2.08075</td><td>-0.15662</td></tr> <tr><td>H</td><td>-2.75503</td><td>-0.53209</td><td>0.00389</td></tr> <tr><td>H</td><td>-1.43576</td><td>3.48772</td><td>-0.15280</td></tr> <tr><td>H</td><td>-0.17492</td><td>-0.38917</td><td>0.08543</td></tr> </tbody> </table>                                                                                                                                                                                                                 |          |          | C | -0.29819 | 1.71476 | -0.02459 | O | 0.86742 | 2.09506 | -0.00362 | N | -1.46487 | 2.47773 | -0.10316 | N | -0.79237 | 0.40982 | 0.02405 | C | -2.60230 | 1.67555 | -0.10190 | C | -2.18316 | 0.38687 | -0.02267 | H | -3.60482 | 2.08075 | -0.15662 | H | -2.75503 | -0.53209 | 0.00389  | H | -1.43576 | 3.48772  | -0.15280 | H | -0.17492 | -0.38917 | 0.08543  |   |          |         |          |   |          |         |          |   |          |         |         |
| C                                                                                                                                                  | -0.29819                                                                                                                                                                                                                                                                                                                                                                                                                                                                                                                                                                                                                                                                                                                                                                                                                                                                                                                                                                                         | 1.71476  | -0.02459 |   |          |         |          |   |         |         |          |   |          |         |          |   |          |         |         |   |          |         |          |   |          |         |          |   |          |         |          |   |          |          |          |   |          |          |          |   |          |          |          |   |          |         |          |   |          |         |          |   |          |         |         |
| O                                                                                                                                                  | 0.86742                                                                                                                                                                                                                                                                                                                                                                                                                                                                                                                                                                                                                                                                                                                                                                                                                                                                                                                                                                                          | 2.09506  | -0.00362 |   |          |         |          |   |         |         |          |   |          |         |          |   |          |         |         |   |          |         |          |   |          |         |          |   |          |         |          |   |          |          |          |   |          |          |          |   |          |          |          |   |          |         |          |   |          |         |          |   |          |         |         |
| N                                                                                                                                                  | -1.46487                                                                                                                                                                                                                                                                                                                                                                                                                                                                                                                                                                                                                                                                                                                                                                                                                                                                                                                                                                                         | 2.47773  | -0.10316 |   |          |         |          |   |         |         |          |   |          |         |          |   |          |         |         |   |          |         |          |   |          |         |          |   |          |         |          |   |          |          |          |   |          |          |          |   |          |          |          |   |          |         |          |   |          |         |          |   |          |         |         |
| N                                                                                                                                                  | -0.79237                                                                                                                                                                                                                                                                                                                                                                                                                                                                                                                                                                                                                                                                                                                                                                                                                                                                                                                                                                                         | 0.40982  | 0.02405  |   |          |         |          |   |         |         |          |   |          |         |          |   |          |         |         |   |          |         |          |   |          |         |          |   |          |         |          |   |          |          |          |   |          |          |          |   |          |          |          |   |          |         |          |   |          |         |          |   |          |         |         |
| C                                                                                                                                                  | -2.60230                                                                                                                                                                                                                                                                                                                                                                                                                                                                                                                                                                                                                                                                                                                                                                                                                                                                                                                                                                                         | 1.67555  | -0.10190 |   |          |         |          |   |         |         |          |   |          |         |          |   |          |         |         |   |          |         |          |   |          |         |          |   |          |         |          |   |          |          |          |   |          |          |          |   |          |          |          |   |          |         |          |   |          |         |          |   |          |         |         |
| C                                                                                                                                                  | -2.18316                                                                                                                                                                                                                                                                                                                                                                                                                                                                                                                                                                                                                                                                                                                                                                                                                                                                                                                                                                                         | 0.38687  | -0.02267 |   |          |         |          |   |         |         |          |   |          |         |          |   |          |         |         |   |          |         |          |   |          |         |          |   |          |         |          |   |          |          |          |   |          |          |          |   |          |          |          |   |          |         |          |   |          |         |          |   |          |         |         |
| H                                                                                                                                                  | -3.60482                                                                                                                                                                                                                                                                                                                                                                                                                                                                                                                                                                                                                                                                                                                                                                                                                                                                                                                                                                                         | 2.08075  | -0.15662 |   |          |         |          |   |         |         |          |   |          |         |          |   |          |         |         |   |          |         |          |   |          |         |          |   |          |         |          |   |          |          |          |   |          |          |          |   |          |          |          |   |          |         |          |   |          |         |          |   |          |         |         |
| H                                                                                                                                                  | -2.75503                                                                                                                                                                                                                                                                                                                                                                                                                                                                                                                                                                                                                                                                                                                                                                                                                                                                                                                                                                                         | -0.53209 | 0.00389  |   |          |         |          |   |         |         |          |   |          |         |          |   |          |         |         |   |          |         |          |   |          |         |          |   |          |         |          |   |          |          |          |   |          |          |          |   |          |          |          |   |          |         |          |   |          |         |          |   |          |         |         |
| H                                                                                                                                                  | -1.43576                                                                                                                                                                                                                                                                                                                                                                                                                                                                                                                                                                                                                                                                                                                                                                                                                                                                                                                                                                                         | 3.48772  | -0.15280 |   |          |         |          |   |         |         |          |   |          |         |          |   |          |         |         |   |          |         |          |   |          |         |          |   |          |         |          |   |          |          |          |   |          |          |          |   |          |          |          |   |          |         |          |   |          |         |          |   |          |         |         |
| H                                                                                                                                                  | -0.17492                                                                                                                                                                                                                                                                                                                                                                                                                                                                                                                                                                                                                                                                                                                                                                                                                                                                                                                                                                                         | -0.38917 | 0.08543  |   |          |         |          |   |         |         |          |   |          |         |          |   |          |         |         |   |          |         |          |   |          |         |          |   |          |         |          |   |          |          |          |   |          |          |          |   |          |          |          |   |          |         |          |   |          |         |          |   |          |         |         |
| <p>Molecule: <b>1a'</b></p>  <p>Energy = -301.160571 Hartree</p> | <p>10</p> <table border="1"> <tbody> <tr><td>C</td><td>-0.38909</td><td>1.65513</td><td>-0.04273</td></tr> <tr><td>O</td><td>0.86575</td><td>2.15709</td><td>-0.03593</td></tr> <tr><td>N</td><td>-1.45907</td><td>2.49304</td><td>-0.10756</td></tr> <tr><td>N</td><td>-0.73322</td><td>0.38875</td><td>0.00816</td></tr> <tr><td>C</td><td>-2.59625</td><td>1.68640</td><td>-0.09648</td></tr> <tr><td>C</td><td>-2.12169</td><td>0.40134</td><td>-0.02542</td></tr> <tr><td>H</td><td>-3.59550</td><td>2.10351</td><td>-0.13920</td></tr> <tr><td>H</td><td>-2.69281</td><td>-0.52122</td><td>0.00427</td></tr> <tr><td>H</td><td>-1.42525</td><td>3.50465</td><td>-0.15515</td></tr> <tr><td>H</td><td>1.46012</td><td>1.38430</td><td>0.01203</td></tr> </tbody> </table>                                                                                                                                                                                                                   |          |          | C | -0.38909 | 1.65513 | -0.04273 | O | 0.86575 | 2.15709 | -0.03593 | N | -1.45907 | 2.49304 | -0.10756 | N | -0.73322 | 0.38875 | 0.00816 | C | -2.59625 | 1.68640 | -0.09648 | C | -2.12169 | 0.40134 | -0.02542 | H | -3.59550 | 2.10351 | -0.13920 | H | -2.69281 | -0.52122 | 0.00427  | H | -1.42525 | 3.50465  | -0.15515 | H | 1.46012  | 1.38430  | 0.01203  |   |          |         |          |   |          |         |          |   |          |         |         |
| C                                                                                                                                                  | -0.38909                                                                                                                                                                                                                                                                                                                                                                                                                                                                                                                                                                                                                                                                                                                                                                                                                                                                                                                                                                                         | 1.65513  | -0.04273 |   |          |         |          |   |         |         |          |   |          |         |          |   |          |         |         |   |          |         |          |   |          |         |          |   |          |         |          |   |          |          |          |   |          |          |          |   |          |          |          |   |          |         |          |   |          |         |          |   |          |         |         |
| O                                                                                                                                                  | 0.86575                                                                                                                                                                                                                                                                                                                                                                                                                                                                                                                                                                                                                                                                                                                                                                                                                                                                                                                                                                                          | 2.15709  | -0.03593 |   |          |         |          |   |         |         |          |   |          |         |          |   |          |         |         |   |          |         |          |   |          |         |          |   |          |         |          |   |          |          |          |   |          |          |          |   |          |          |          |   |          |         |          |   |          |         |          |   |          |         |         |
| N                                                                                                                                                  | -1.45907                                                                                                                                                                                                                                                                                                                                                                                                                                                                                                                                                                                                                                                                                                                                                                                                                                                                                                                                                                                         | 2.49304  | -0.10756 |   |          |         |          |   |         |         |          |   |          |         |          |   |          |         |         |   |          |         |          |   |          |         |          |   |          |         |          |   |          |          |          |   |          |          |          |   |          |          |          |   |          |         |          |   |          |         |          |   |          |         |         |
| N                                                                                                                                                  | -0.73322                                                                                                                                                                                                                                                                                                                                                                                                                                                                                                                                                                                                                                                                                                                                                                                                                                                                                                                                                                                         | 0.38875  | 0.00816  |   |          |         |          |   |         |         |          |   |          |         |          |   |          |         |         |   |          |         |          |   |          |         |          |   |          |         |          |   |          |          |          |   |          |          |          |   |          |          |          |   |          |         |          |   |          |         |          |   |          |         |         |
| C                                                                                                                                                  | -2.59625                                                                                                                                                                                                                                                                                                                                                                                                                                                                                                                                                                                                                                                                                                                                                                                                                                                                                                                                                                                         | 1.68640  | -0.09648 |   |          |         |          |   |         |         |          |   |          |         |          |   |          |         |         |   |          |         |          |   |          |         |          |   |          |         |          |   |          |          |          |   |          |          |          |   |          |          |          |   |          |         |          |   |          |         |          |   |          |         |         |
| C                                                                                                                                                  | -2.12169                                                                                                                                                                                                                                                                                                                                                                                                                                                                                                                                                                                                                                                                                                                                                                                                                                                                                                                                                                                         | 0.40134  | -0.02542 |   |          |         |          |   |         |         |          |   |          |         |          |   |          |         |         |   |          |         |          |   |          |         |          |   |          |         |          |   |          |          |          |   |          |          |          |   |          |          |          |   |          |         |          |   |          |         |          |   |          |         |         |
| H                                                                                                                                                  | -3.59550                                                                                                                                                                                                                                                                                                                                                                                                                                                                                                                                                                                                                                                                                                                                                                                                                                                                                                                                                                                         | 2.10351  | -0.13920 |   |          |         |          |   |         |         |          |   |          |         |          |   |          |         |         |   |          |         |          |   |          |         |          |   |          |         |          |   |          |          |          |   |          |          |          |   |          |          |          |   |          |         |          |   |          |         |          |   |          |         |         |
| H                                                                                                                                                  | -2.69281                                                                                                                                                                                                                                                                                                                                                                                                                                                                                                                                                                                                                                                                                                                                                                                                                                                                                                                                                                                         | -0.52122 | 0.00427  |   |          |         |          |   |         |         |          |   |          |         |          |   |          |         |         |   |          |         |          |   |          |         |          |   |          |         |          |   |          |          |          |   |          |          |          |   |          |          |          |   |          |         |          |   |          |         |          |   |          |         |         |
| H                                                                                                                                                  | -1.42525                                                                                                                                                                                                                                                                                                                                                                                                                                                                                                                                                                                                                                                                                                                                                                                                                                                                                                                                                                                         | 3.50465  | -0.15515 |   |          |         |          |   |         |         |          |   |          |         |          |   |          |         |         |   |          |         |          |   |          |         |          |   |          |         |          |   |          |          |          |   |          |          |          |   |          |          |          |   |          |         |          |   |          |         |          |   |          |         |         |
| H                                                                                                                                                  | 1.46012                                                                                                                                                                                                                                                                                                                                                                                                                                                                                                                                                                                                                                                                                                                                                                                                                                                                                                                                                                                          | 1.38430  | 0.01203  |   |          |         |          |   |         |         |          |   |          |         |          |   |          |         |         |   |          |         |          |   |          |         |          |   |          |         |          |   |          |          |          |   |          |          |          |   |          |          |          |   |          |         |          |   |          |         |          |   |          |         |         |
| <p>Molecule: <b>1b</b></p>  <p>Energy = -340.695728 Hartree</p> | <p>13</p> <table border="1"> <tbody> <tr><td>C</td><td>-0.31864</td><td>1.72287</td><td>0.11168</td></tr> <tr><td>O</td><td>0.83527</td><td>2.11651</td><td>0.26816</td></tr> <tr><td>N</td><td>-1.46845</td><td>2.48844</td><td>-0.11032</td></tr> <tr><td>N</td><td>-0.79889</td><td>0.41499</td><td>0.11070</td></tr> <tr><td>C</td><td>-2.58527</td><td>1.66722</td><td>-0.23795</td></tr> <tr><td>C</td><td>-2.17273</td><td>0.38033</td><td>-0.10176</td></tr> <tr><td>H</td><td>-3.57704</td><td>2.06619</td><td>-0.41397</td></tr> <tr><td>H</td><td>-2.73693</td><td>-0.54294</td><td>-0.13801</td></tr> <tr><td>H</td><td>-0.18526</td><td>-0.37766</td><td>0.24585</td></tr> <tr><td>C</td><td>-1.43377</td><td>3.93064</td><td>-0.18480</td></tr> <tr><td>H</td><td>-0.38871</td><td>4.23576</td><td>-0.04971</td></tr> <tr><td>H</td><td>-1.79039</td><td>4.28513</td><td>-1.16317</td></tr> <tr><td>H</td><td>-2.04719</td><td>4.38352</td><td>0.60830</td></tr> </tbody> </table> |          |          | C | -0.31864 | 1.72287 | 0.11168  | O | 0.83527 | 2.11651 | 0.26816  | N | -1.46845 | 2.48844 | -0.11032 | N | -0.79889 | 0.41499 | 0.11070 | C | -2.58527 | 1.66722 | -0.23795 | C | -2.17273 | 0.38033 | -0.10176 | H | -3.57704 | 2.06619 | -0.41397 | H | -2.73693 | -0.54294 | -0.13801 | H | -0.18526 | -0.37766 | 0.24585  | C | -1.43377 | 3.93064  | -0.18480 | H | -0.38871 | 4.23576 | -0.04971 | H | -1.79039 | 4.28513 | -1.16317 | H | -2.04719 | 4.38352 | 0.60830 |
| C                                                                                                                                                  | -0.31864                                                                                                                                                                                                                                                                                                                                                                                                                                                                                                                                                                                                                                                                                                                                                                                                                                                                                                                                                                                         | 1.72287  | 0.11168  |   |          |         |          |   |         |         |          |   |          |         |          |   |          |         |         |   |          |         |          |   |          |         |          |   |          |         |          |   |          |          |          |   |          |          |          |   |          |          |          |   |          |         |          |   |          |         |          |   |          |         |         |
| O                                                                                                                                                  | 0.83527                                                                                                                                                                                                                                                                                                                                                                                                                                                                                                                                                                                                                                                                                                                                                                                                                                                                                                                                                                                          | 2.11651  | 0.26816  |   |          |         |          |   |         |         |          |   |          |         |          |   |          |         |         |   |          |         |          |   |          |         |          |   |          |         |          |   |          |          |          |   |          |          |          |   |          |          |          |   |          |         |          |   |          |         |          |   |          |         |         |
| N                                                                                                                                                  | -1.46845                                                                                                                                                                                                                                                                                                                                                                                                                                                                                                                                                                                                                                                                                                                                                                                                                                                                                                                                                                                         | 2.48844  | -0.11032 |   |          |         |          |   |         |         |          |   |          |         |          |   |          |         |         |   |          |         |          |   |          |         |          |   |          |         |          |   |          |          |          |   |          |          |          |   |          |          |          |   |          |         |          |   |          |         |          |   |          |         |         |
| N                                                                                                                                                  | -0.79889                                                                                                                                                                                                                                                                                                                                                                                                                                                                                                                                                                                                                                                                                                                                                                                                                                                                                                                                                                                         | 0.41499  | 0.11070  |   |          |         |          |   |         |         |          |   |          |         |          |   |          |         |         |   |          |         |          |   |          |         |          |   |          |         |          |   |          |          |          |   |          |          |          |   |          |          |          |   |          |         |          |   |          |         |          |   |          |         |         |
| C                                                                                                                                                  | -2.58527                                                                                                                                                                                                                                                                                                                                                                                                                                                                                                                                                                                                                                                                                                                                                                                                                                                                                                                                                                                         | 1.66722  | -0.23795 |   |          |         |          |   |         |         |          |   |          |         |          |   |          |         |         |   |          |         |          |   |          |         |          |   |          |         |          |   |          |          |          |   |          |          |          |   |          |          |          |   |          |         |          |   |          |         |          |   |          |         |         |
| C                                                                                                                                                  | -2.17273                                                                                                                                                                                                                                                                                                                                                                                                                                                                                                                                                                                                                                                                                                                                                                                                                                                                                                                                                                                         | 0.38033  | -0.10176 |   |          |         |          |   |         |         |          |   |          |         |          |   |          |         |         |   |          |         |          |   |          |         |          |   |          |         |          |   |          |          |          |   |          |          |          |   |          |          |          |   |          |         |          |   |          |         |          |   |          |         |         |
| H                                                                                                                                                  | -3.57704                                                                                                                                                                                                                                                                                                                                                                                                                                                                                                                                                                                                                                                                                                                                                                                                                                                                                                                                                                                         | 2.06619  | -0.41397 |   |          |         |          |   |         |         |          |   |          |         |          |   |          |         |         |   |          |         |          |   |          |         |          |   |          |         |          |   |          |          |          |   |          |          |          |   |          |          |          |   |          |         |          |   |          |         |          |   |          |         |         |
| H                                                                                                                                                  | -2.73693                                                                                                                                                                                                                                                                                                                                                                                                                                                                                                                                                                                                                                                                                                                                                                                                                                                                                                                                                                                         | -0.54294 | -0.13801 |   |          |         |          |   |         |         |          |   |          |         |          |   |          |         |         |   |          |         |          |   |          |         |          |   |          |         |          |   |          |          |          |   |          |          |          |   |          |          |          |   |          |         |          |   |          |         |          |   |          |         |         |
| H                                                                                                                                                  | -0.18526                                                                                                                                                                                                                                                                                                                                                                                                                                                                                                                                                                                                                                                                                                                                                                                                                                                                                                                                                                                         | -0.37766 | 0.24585  |   |          |         |          |   |         |         |          |   |          |         |          |   |          |         |         |   |          |         |          |   |          |         |          |   |          |         |          |   |          |          |          |   |          |          |          |   |          |          |          |   |          |         |          |   |          |         |          |   |          |         |         |
| C                                                                                                                                                  | -1.43377                                                                                                                                                                                                                                                                                                                                                                                                                                                                                                                                                                                                                                                                                                                                                                                                                                                                                                                                                                                         | 3.93064  | -0.18480 |   |          |         |          |   |         |         |          |   |          |         |          |   |          |         |         |   |          |         |          |   |          |         |          |   |          |         |          |   |          |          |          |   |          |          |          |   |          |          |          |   |          |         |          |   |          |         |          |   |          |         |         |
| H                                                                                                                                                  | -0.38871                                                                                                                                                                                                                                                                                                                                                                                                                                                                                                                                                                                                                                                                                                                                                                                                                                                                                                                                                                                         | 4.23576  | -0.04971 |   |          |         |          |   |         |         |          |   |          |         |          |   |          |         |         |   |          |         |          |   |          |         |          |   |          |         |          |   |          |          |          |   |          |          |          |   |          |          |          |   |          |         |          |   |          |         |          |   |          |         |         |
| H                                                                                                                                                  | -1.79039                                                                                                                                                                                                                                                                                                                                                                                                                                                                                                                                                                                                                                                                                                                                                                                                                                                                                                                                                                                         | 4.28513  | -1.16317 |   |          |         |          |   |         |         |          |   |          |         |          |   |          |         |         |   |          |         |          |   |          |         |          |   |          |         |          |   |          |          |          |   |          |          |          |   |          |          |          |   |          |         |          |   |          |         |          |   |          |         |         |
| H                                                                                                                                                  | -2.04719                                                                                                                                                                                                                                                                                                                                                                                                                                                                                                                                                                                                                                                                                                                                                                                                                                                                                                                                                                                         | 4.38352  | 0.60830  |   |          |         |          |   |         |         |          |   |          |         |          |   |          |         |         |   |          |         |          |   |          |         |          |   |          |         |          |   |          |          |          |   |          |          |          |   |          |          |          |   |          |         |          |   |          |         |          |   |          |         |         |



|                                                                                                                                                                                                            |                                                                                                                                                                                                                                                                                                                                                                                                                                                                                                                                                                                                                                                                                                                                                                                                                                                                                                                                                                                                                                                                                                                                                                                                                                                                                                                                                                                                                                                                                                                                  |          |          |         |          |   |          |         |          |   |          |         |          |   |          |         |          |   |          |         |          |   |          |         |          |   |          |         |          |   |          |          |          |   |          |          |          |   |          |          |          |   |          |          |          |   |          |          |         |   |         |          |         |   |         |          |          |   |          |          |          |   |          |          |          |   |         |          |         |   |         |          |          |   |         |          |         |   |          |         |          |
|------------------------------------------------------------------------------------------------------------------------------------------------------------------------------------------------------------|----------------------------------------------------------------------------------------------------------------------------------------------------------------------------------------------------------------------------------------------------------------------------------------------------------------------------------------------------------------------------------------------------------------------------------------------------------------------------------------------------------------------------------------------------------------------------------------------------------------------------------------------------------------------------------------------------------------------------------------------------------------------------------------------------------------------------------------------------------------------------------------------------------------------------------------------------------------------------------------------------------------------------------------------------------------------------------------------------------------------------------------------------------------------------------------------------------------------------------------------------------------------------------------------------------------------------------------------------------------------------------------------------------------------------------------------------------------------------------------------------------------------------------|----------|----------|---------|----------|---|----------|---------|----------|---|----------|---------|----------|---|----------|---------|----------|---|----------|---------|----------|---|----------|---------|----------|---|----------|---------|----------|---|----------|----------|----------|---|----------|----------|----------|---|----------|----------|----------|---|----------|----------|----------|---|----------|----------|---------|---|---------|----------|---------|---|---------|----------|----------|---|----------|----------|----------|---|----------|----------|----------|---|---------|----------|---------|---|---------|----------|----------|---|---------|----------|---------|---|----------|---------|----------|
| <p style="text-align: center;">Molecule: <b>1b'</b></p> 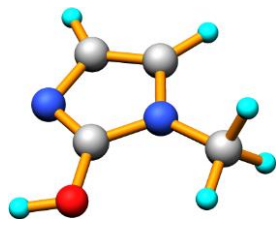 <p style="text-align: center;">Energy = -340.400740 Hartree</p>  | <p style="text-align: center;">13</p> <table border="1"> <tbody> <tr><td>C</td><td>-0.39760</td><td>1.66693</td><td>0.03998</td></tr> <tr><td>O</td><td>0.85001</td><td>2.17679</td><td>0.17306</td></tr> <tr><td>N</td><td>-1.45997</td><td>2.50304</td><td>-0.13241</td></tr> <tr><td>N</td><td>-0.72731</td><td>0.39402</td><td>0.05742</td></tr> <tr><td>C</td><td>-2.57877</td><td>1.67491</td><td>-0.23326</td></tr> <tr><td>C</td><td>-2.10353</td><td>0.39336</td><td>-0.11465</td></tr> <tr><td>H</td><td>-3.57298</td><td>2.08336</td><td>-0.37632</td></tr> <tr><td>H</td><td>-2.66634</td><td>-0.53456</td><td>-0.14321</td></tr> <tr><td>C</td><td>-1.43396</td><td>3.95180</td><td>-0.18993</td></tr> <tr><td>H</td><td>-0.39184</td><td>4.28633</td><td>-0.15116</td></tr> <tr><td>H</td><td>-1.88747</td><td>4.30698</td><td>-1.12598</td></tr> <tr><td>H</td><td>-1.97904</td><td>4.38640</td><td>0.66063</td></tr> <tr><td>H</td><td>1.43779</td><td>1.40464</td><td>0.27583</td></tr> </tbody> </table>                                                                                                                                                                                                                                                                                                                                                                                                                                                                                                       | C        | -0.39760 | 1.66693 | 0.03998  | O | 0.85001  | 2.17679 | 0.17306  | N | -1.45997 | 2.50304 | -0.13241 | N | -0.72731 | 0.39402 | 0.05742  | C | -2.57877 | 1.67491 | -0.23326 | C | -2.10353 | 0.39336 | -0.11465 | H | -3.57298 | 2.08336 | -0.37632 | H | -2.66634 | -0.53456 | -0.14321 | C | -1.43396 | 3.95180  | -0.18993 | H | -0.39184 | 4.28633  | -0.15116 | H | -1.88747 | 4.30698  | -1.12598 | H | -1.97904 | 4.38640  | 0.66063 | H | 1.43779 | 1.40464  | 0.27583 |   |         |          |          |   |          |          |          |   |          |          |          |   |         |          |         |   |         |          |          |   |         |          |         |   |          |         |          |
| C                                                                                                                                                                                                          | -0.39760                                                                                                                                                                                                                                                                                                                                                                                                                                                                                                                                                                                                                                                                                                                                                                                                                                                                                                                                                                                                                                                                                                                                                                                                                                                                                                                                                                                                                                                                                                                         | 1.66693  | 0.03998  |         |          |   |          |         |          |   |          |         |          |   |          |         |          |   |          |         |          |   |          |         |          |   |          |         |          |   |          |          |          |   |          |          |          |   |          |          |          |   |          |          |          |   |          |          |         |   |         |          |         |   |         |          |          |   |          |          |          |   |          |          |          |   |         |          |         |   |         |          |          |   |         |          |         |   |          |         |          |
| O                                                                                                                                                                                                          | 0.85001                                                                                                                                                                                                                                                                                                                                                                                                                                                                                                                                                                                                                                                                                                                                                                                                                                                                                                                                                                                                                                                                                                                                                                                                                                                                                                                                                                                                                                                                                                                          | 2.17679  | 0.17306  |         |          |   |          |         |          |   |          |         |          |   |          |         |          |   |          |         |          |   |          |         |          |   |          |         |          |   |          |          |          |   |          |          |          |   |          |          |          |   |          |          |          |   |          |          |         |   |         |          |         |   |         |          |          |   |          |          |          |   |          |          |          |   |         |          |         |   |         |          |          |   |         |          |         |   |          |         |          |
| N                                                                                                                                                                                                          | -1.45997                                                                                                                                                                                                                                                                                                                                                                                                                                                                                                                                                                                                                                                                                                                                                                                                                                                                                                                                                                                                                                                                                                                                                                                                                                                                                                                                                                                                                                                                                                                         | 2.50304  | -0.13241 |         |          |   |          |         |          |   |          |         |          |   |          |         |          |   |          |         |          |   |          |         |          |   |          |         |          |   |          |          |          |   |          |          |          |   |          |          |          |   |          |          |          |   |          |          |         |   |         |          |         |   |         |          |          |   |          |          |          |   |          |          |          |   |         |          |         |   |         |          |          |   |         |          |         |   |          |         |          |
| N                                                                                                                                                                                                          | -0.72731                                                                                                                                                                                                                                                                                                                                                                                                                                                                                                                                                                                                                                                                                                                                                                                                                                                                                                                                                                                                                                                                                                                                                                                                                                                                                                                                                                                                                                                                                                                         | 0.39402  | 0.05742  |         |          |   |          |         |          |   |          |         |          |   |          |         |          |   |          |         |          |   |          |         |          |   |          |         |          |   |          |          |          |   |          |          |          |   |          |          |          |   |          |          |          |   |          |          |         |   |         |          |         |   |         |          |          |   |          |          |          |   |          |          |          |   |         |          |         |   |         |          |          |   |         |          |         |   |          |         |          |
| C                                                                                                                                                                                                          | -2.57877                                                                                                                                                                                                                                                                                                                                                                                                                                                                                                                                                                                                                                                                                                                                                                                                                                                                                                                                                                                                                                                                                                                                                                                                                                                                                                                                                                                                                                                                                                                         | 1.67491  | -0.23326 |         |          |   |          |         |          |   |          |         |          |   |          |         |          |   |          |         |          |   |          |         |          |   |          |         |          |   |          |          |          |   |          |          |          |   |          |          |          |   |          |          |          |   |          |          |         |   |         |          |         |   |         |          |          |   |          |          |          |   |          |          |          |   |         |          |         |   |         |          |          |   |         |          |         |   |          |         |          |
| C                                                                                                                                                                                                          | -2.10353                                                                                                                                                                                                                                                                                                                                                                                                                                                                                                                                                                                                                                                                                                                                                                                                                                                                                                                                                                                                                                                                                                                                                                                                                                                                                                                                                                                                                                                                                                                         | 0.39336  | -0.11465 |         |          |   |          |         |          |   |          |         |          |   |          |         |          |   |          |         |          |   |          |         |          |   |          |         |          |   |          |          |          |   |          |          |          |   |          |          |          |   |          |          |          |   |          |          |         |   |         |          |         |   |         |          |          |   |          |          |          |   |          |          |          |   |         |          |         |   |         |          |          |   |         |          |         |   |          |         |          |
| H                                                                                                                                                                                                          | -3.57298                                                                                                                                                                                                                                                                                                                                                                                                                                                                                                                                                                                                                                                                                                                                                                                                                                                                                                                                                                                                                                                                                                                                                                                                                                                                                                                                                                                                                                                                                                                         | 2.08336  | -0.37632 |         |          |   |          |         |          |   |          |         |          |   |          |         |          |   |          |         |          |   |          |         |          |   |          |         |          |   |          |          |          |   |          |          |          |   |          |          |          |   |          |          |          |   |          |          |         |   |         |          |         |   |         |          |          |   |          |          |          |   |          |          |          |   |         |          |         |   |         |          |          |   |         |          |         |   |          |         |          |
| H                                                                                                                                                                                                          | -2.66634                                                                                                                                                                                                                                                                                                                                                                                                                                                                                                                                                                                                                                                                                                                                                                                                                                                                                                                                                                                                                                                                                                                                                                                                                                                                                                                                                                                                                                                                                                                         | -0.53456 | -0.14321 |         |          |   |          |         |          |   |          |         |          |   |          |         |          |   |          |         |          |   |          |         |          |   |          |         |          |   |          |          |          |   |          |          |          |   |          |          |          |   |          |          |          |   |          |          |         |   |         |          |         |   |         |          |          |   |          |          |          |   |          |          |          |   |         |          |         |   |         |          |          |   |         |          |         |   |          |         |          |
| C                                                                                                                                                                                                          | -1.43396                                                                                                                                                                                                                                                                                                                                                                                                                                                                                                                                                                                                                                                                                                                                                                                                                                                                                                                                                                                                                                                                                                                                                                                                                                                                                                                                                                                                                                                                                                                         | 3.95180  | -0.18993 |         |          |   |          |         |          |   |          |         |          |   |          |         |          |   |          |         |          |   |          |         |          |   |          |         |          |   |          |          |          |   |          |          |          |   |          |          |          |   |          |          |          |   |          |          |         |   |         |          |         |   |         |          |          |   |          |          |          |   |          |          |          |   |         |          |         |   |         |          |          |   |         |          |         |   |          |         |          |
| H                                                                                                                                                                                                          | -0.39184                                                                                                                                                                                                                                                                                                                                                                                                                                                                                                                                                                                                                                                                                                                                                                                                                                                                                                                                                                                                                                                                                                                                                                                                                                                                                                                                                                                                                                                                                                                         | 4.28633  | -0.15116 |         |          |   |          |         |          |   |          |         |          |   |          |         |          |   |          |         |          |   |          |         |          |   |          |         |          |   |          |          |          |   |          |          |          |   |          |          |          |   |          |          |          |   |          |          |         |   |         |          |         |   |         |          |          |   |          |          |          |   |          |          |          |   |         |          |         |   |         |          |          |   |         |          |         |   |          |         |          |
| H                                                                                                                                                                                                          | -1.88747                                                                                                                                                                                                                                                                                                                                                                                                                                                                                                                                                                                                                                                                                                                                                                                                                                                                                                                                                                                                                                                                                                                                                                                                                                                                                                                                                                                                                                                                                                                         | 4.30698  | -1.12598 |         |          |   |          |         |          |   |          |         |          |   |          |         |          |   |          |         |          |   |          |         |          |   |          |         |          |   |          |          |          |   |          |          |          |   |          |          |          |   |          |          |          |   |          |          |         |   |         |          |         |   |         |          |          |   |          |          |          |   |          |          |          |   |         |          |         |   |         |          |          |   |         |          |         |   |          |         |          |
| H                                                                                                                                                                                                          | -1.97904                                                                                                                                                                                                                                                                                                                                                                                                                                                                                                                                                                                                                                                                                                                                                                                                                                                                                                                                                                                                                                                                                                                                                                                                                                                                                                                                                                                                                                                                                                                         | 4.38640  | 0.66063  |         |          |   |          |         |          |   |          |         |          |   |          |         |          |   |          |         |          |   |          |         |          |   |          |         |          |   |          |          |          |   |          |          |          |   |          |          |          |   |          |          |          |   |          |          |         |   |         |          |         |   |         |          |          |   |          |          |          |   |          |          |          |   |         |          |         |   |         |          |          |   |         |          |         |   |          |         |          |
| H                                                                                                                                                                                                          | 1.43779                                                                                                                                                                                                                                                                                                                                                                                                                                                                                                                                                                                                                                                                                                                                                                                                                                                                                                                                                                                                                                                                                                                                                                                                                                                                                                                                                                                                                                                                                                                          | 1.40464  | 0.27583  |         |          |   |          |         |          |   |          |         |          |   |          |         |          |   |          |         |          |   |          |         |          |   |          |         |          |   |          |          |          |   |          |          |          |   |          |          |          |   |          |          |          |   |          |          |         |   |         |          |         |   |         |          |          |   |          |          |          |   |          |          |          |   |         |          |         |   |         |          |          |   |         |          |         |   |          |         |          |
| <p style="text-align: center;">Molecule: <b>1c</b></p>  <p style="text-align: center;">Energy = -379.982620 Hartree</p>  | <p style="text-align: center;">16</p> <table border="1"> <tbody> <tr><td>C</td><td>-0.31447</td><td>1.71118</td><td>-0.00658</td></tr> <tr><td>O</td><td>0.85499</td><td>2.09511</td><td>0.04226</td></tr> <tr><td>N</td><td>-1.46917</td><td>2.48703</td><td>-0.12890</td></tr> <tr><td>N</td><td>-0.79132</td><td>0.39975</td><td>0.04724</td></tr> <tr><td>C</td><td>-2.59745</td><td>1.67474</td><td>-0.14742</td></tr> <tr><td>C</td><td>-2.17889</td><td>0.38605</td><td>-0.03896</td></tr> <tr><td>H</td><td>-3.59807</td><td>2.08022</td><td>-0.23664</td></tr> <tr><td>H</td><td>-2.74866</td><td>-0.53505</td><td>-0.01581</td></tr> <tr><td>C</td><td>-1.42974</td><td>3.92833</td><td>-0.21730</td></tr> <tr><td>H</td><td>-0.37446</td><td>4.22540</td><td>-0.17382</td></tr> <tr><td>H</td><td>-1.86539</td><td>4.27883</td><td>-1.16486</td></tr> <tr><td>H</td><td>-1.97065</td><td>4.39151</td><td>0.62145</td></tr> <tr><td>C</td><td>0.08632</td><td>-0.74046</td><td>0.17420</td></tr> <tr><td>H</td><td>1.11281</td><td>-0.35530</td><td>0.21658</td></tr> <tr><td>H</td><td>-0.12662</td><td>-1.30361</td><td>1.09516</td></tr> <tr><td>H</td><td>-0.01123</td><td>-1.41372</td><td>-0.69060</td></tr> </tbody> </table>                                                                                                                                                                                                                                                                                   | C        | -0.31447 | 1.71118 | -0.00658 | O | 0.85499  | 2.09511 | 0.04226  | N | -1.46917 | 2.48703 | -0.12890 | N | -0.79132 | 0.39975 | 0.04724  | C | -2.59745 | 1.67474 | -0.14742 | C | -2.17889 | 0.38605 | -0.03896 | H | -3.59807 | 2.08022 | -0.23664 | H | -2.74866 | -0.53505 | -0.01581 | C | -1.42974 | 3.92833  | -0.21730 | H | -0.37446 | 4.22540  | -0.17382 | H | -1.86539 | 4.27883  | -1.16486 | H | -1.97065 | 4.39151  | 0.62145 | C | 0.08632 | -0.74046 | 0.17420 | H | 1.11281 | -0.35530 | 0.21658  | H | -0.12662 | -1.30361 | 1.09516  | H | -0.01123 | -1.41372 | -0.69060 |   |         |          |         |   |         |          |          |   |         |          |         |   |          |         |          |
| C                                                                                                                                                                                                          | -0.31447                                                                                                                                                                                                                                                                                                                                                                                                                                                                                                                                                                                                                                                                                                                                                                                                                                                                                                                                                                                                                                                                                                                                                                                                                                                                                                                                                                                                                                                                                                                         | 1.71118  | -0.00658 |         |          |   |          |         |          |   |          |         |          |   |          |         |          |   |          |         |          |   |          |         |          |   |          |         |          |   |          |          |          |   |          |          |          |   |          |          |          |   |          |          |          |   |          |          |         |   |         |          |         |   |         |          |          |   |          |          |          |   |          |          |          |   |         |          |         |   |         |          |          |   |         |          |         |   |          |         |          |
| O                                                                                                                                                                                                          | 0.85499                                                                                                                                                                                                                                                                                                                                                                                                                                                                                                                                                                                                                                                                                                                                                                                                                                                                                                                                                                                                                                                                                                                                                                                                                                                                                                                                                                                                                                                                                                                          | 2.09511  | 0.04226  |         |          |   |          |         |          |   |          |         |          |   |          |         |          |   |          |         |          |   |          |         |          |   |          |         |          |   |          |          |          |   |          |          |          |   |          |          |          |   |          |          |          |   |          |          |         |   |         |          |         |   |         |          |          |   |          |          |          |   |          |          |          |   |         |          |         |   |         |          |          |   |         |          |         |   |          |         |          |
| N                                                                                                                                                                                                          | -1.46917                                                                                                                                                                                                                                                                                                                                                                                                                                                                                                                                                                                                                                                                                                                                                                                                                                                                                                                                                                                                                                                                                                                                                                                                                                                                                                                                                                                                                                                                                                                         | 2.48703  | -0.12890 |         |          |   |          |         |          |   |          |         |          |   |          |         |          |   |          |         |          |   |          |         |          |   |          |         |          |   |          |          |          |   |          |          |          |   |          |          |          |   |          |          |          |   |          |          |         |   |         |          |         |   |         |          |          |   |          |          |          |   |          |          |          |   |         |          |         |   |         |          |          |   |         |          |         |   |          |         |          |
| N                                                                                                                                                                                                          | -0.79132                                                                                                                                                                                                                                                                                                                                                                                                                                                                                                                                                                                                                                                                                                                                                                                                                                                                                                                                                                                                                                                                                                                                                                                                                                                                                                                                                                                                                                                                                                                         | 0.39975  | 0.04724  |         |          |   |          |         |          |   |          |         |          |   |          |         |          |   |          |         |          |   |          |         |          |   |          |         |          |   |          |          |          |   |          |          |          |   |          |          |          |   |          |          |          |   |          |          |         |   |         |          |         |   |         |          |          |   |          |          |          |   |          |          |          |   |         |          |         |   |         |          |          |   |         |          |         |   |          |         |          |
| C                                                                                                                                                                                                          | -2.59745                                                                                                                                                                                                                                                                                                                                                                                                                                                                                                                                                                                                                                                                                                                                                                                                                                                                                                                                                                                                                                                                                                                                                                                                                                                                                                                                                                                                                                                                                                                         | 1.67474  | -0.14742 |         |          |   |          |         |          |   |          |         |          |   |          |         |          |   |          |         |          |   |          |         |          |   |          |         |          |   |          |          |          |   |          |          |          |   |          |          |          |   |          |          |          |   |          |          |         |   |         |          |         |   |         |          |          |   |          |          |          |   |          |          |          |   |         |          |         |   |         |          |          |   |         |          |         |   |          |         |          |
| C                                                                                                                                                                                                          | -2.17889                                                                                                                                                                                                                                                                                                                                                                                                                                                                                                                                                                                                                                                                                                                                                                                                                                                                                                                                                                                                                                                                                                                                                                                                                                                                                                                                                                                                                                                                                                                         | 0.38605  | -0.03896 |         |          |   |          |         |          |   |          |         |          |   |          |         |          |   |          |         |          |   |          |         |          |   |          |         |          |   |          |          |          |   |          |          |          |   |          |          |          |   |          |          |          |   |          |          |         |   |         |          |         |   |         |          |          |   |          |          |          |   |          |          |          |   |         |          |         |   |         |          |          |   |         |          |         |   |          |         |          |
| H                                                                                                                                                                                                          | -3.59807                                                                                                                                                                                                                                                                                                                                                                                                                                                                                                                                                                                                                                                                                                                                                                                                                                                                                                                                                                                                                                                                                                                                                                                                                                                                                                                                                                                                                                                                                                                         | 2.08022  | -0.23664 |         |          |   |          |         |          |   |          |         |          |   |          |         |          |   |          |         |          |   |          |         |          |   |          |         |          |   |          |          |          |   |          |          |          |   |          |          |          |   |          |          |          |   |          |          |         |   |         |          |         |   |         |          |          |   |          |          |          |   |          |          |          |   |         |          |         |   |         |          |          |   |         |          |         |   |          |         |          |
| H                                                                                                                                                                                                          | -2.74866                                                                                                                                                                                                                                                                                                                                                                                                                                                                                                                                                                                                                                                                                                                                                                                                                                                                                                                                                                                                                                                                                                                                                                                                                                                                                                                                                                                                                                                                                                                         | -0.53505 | -0.01581 |         |          |   |          |         |          |   |          |         |          |   |          |         |          |   |          |         |          |   |          |         |          |   |          |         |          |   |          |          |          |   |          |          |          |   |          |          |          |   |          |          |          |   |          |          |         |   |         |          |         |   |         |          |          |   |          |          |          |   |          |          |          |   |         |          |         |   |         |          |          |   |         |          |         |   |          |         |          |
| C                                                                                                                                                                                                          | -1.42974                                                                                                                                                                                                                                                                                                                                                                                                                                                                                                                                                                                                                                                                                                                                                                                                                                                                                                                                                                                                                                                                                                                                                                                                                                                                                                                                                                                                                                                                                                                         | 3.92833  | -0.21730 |         |          |   |          |         |          |   |          |         |          |   |          |         |          |   |          |         |          |   |          |         |          |   |          |         |          |   |          |          |          |   |          |          |          |   |          |          |          |   |          |          |          |   |          |          |         |   |         |          |         |   |         |          |          |   |          |          |          |   |          |          |          |   |         |          |         |   |         |          |          |   |         |          |         |   |          |         |          |
| H                                                                                                                                                                                                          | -0.37446                                                                                                                                                                                                                                                                                                                                                                                                                                                                                                                                                                                                                                                                                                                                                                                                                                                                                                                                                                                                                                                                                                                                                                                                                                                                                                                                                                                                                                                                                                                         | 4.22540  | -0.17382 |         |          |   |          |         |          |   |          |         |          |   |          |         |          |   |          |         |          |   |          |         |          |   |          |         |          |   |          |          |          |   |          |          |          |   |          |          |          |   |          |          |          |   |          |          |         |   |         |          |         |   |         |          |          |   |          |          |          |   |          |          |          |   |         |          |         |   |         |          |          |   |         |          |         |   |          |         |          |
| H                                                                                                                                                                                                          | -1.86539                                                                                                                                                                                                                                                                                                                                                                                                                                                                                                                                                                                                                                                                                                                                                                                                                                                                                                                                                                                                                                                                                                                                                                                                                                                                                                                                                                                                                                                                                                                         | 4.27883  | -1.16486 |         |          |   |          |         |          |   |          |         |          |   |          |         |          |   |          |         |          |   |          |         |          |   |          |         |          |   |          |          |          |   |          |          |          |   |          |          |          |   |          |          |          |   |          |          |         |   |         |          |         |   |         |          |          |   |          |          |          |   |          |          |          |   |         |          |         |   |         |          |          |   |         |          |         |   |          |         |          |
| H                                                                                                                                                                                                          | -1.97065                                                                                                                                                                                                                                                                                                                                                                                                                                                                                                                                                                                                                                                                                                                                                                                                                                                                                                                                                                                                                                                                                                                                                                                                                                                                                                                                                                                                                                                                                                                         | 4.39151  | 0.62145  |         |          |   |          |         |          |   |          |         |          |   |          |         |          |   |          |         |          |   |          |         |          |   |          |         |          |   |          |          |          |   |          |          |          |   |          |          |          |   |          |          |          |   |          |          |         |   |         |          |         |   |         |          |          |   |          |          |          |   |          |          |          |   |         |          |         |   |         |          |          |   |         |          |         |   |          |         |          |
| C                                                                                                                                                                                                          | 0.08632                                                                                                                                                                                                                                                                                                                                                                                                                                                                                                                                                                                                                                                                                                                                                                                                                                                                                                                                                                                                                                                                                                                                                                                                                                                                                                                                                                                                                                                                                                                          | -0.74046 | 0.17420  |         |          |   |          |         |          |   |          |         |          |   |          |         |          |   |          |         |          |   |          |         |          |   |          |         |          |   |          |          |          |   |          |          |          |   |          |          |          |   |          |          |          |   |          |          |         |   |         |          |         |   |         |          |          |   |          |          |          |   |          |          |          |   |         |          |         |   |         |          |          |   |         |          |         |   |          |         |          |
| H                                                                                                                                                                                                          | 1.11281                                                                                                                                                                                                                                                                                                                                                                                                                                                                                                                                                                                                                                                                                                                                                                                                                                                                                                                                                                                                                                                                                                                                                                                                                                                                                                                                                                                                                                                                                                                          | -0.35530 | 0.21658  |         |          |   |          |         |          |   |          |         |          |   |          |         |          |   |          |         |          |   |          |         |          |   |          |         |          |   |          |          |          |   |          |          |          |   |          |          |          |   |          |          |          |   |          |          |         |   |         |          |         |   |         |          |          |   |          |          |          |   |          |          |          |   |         |          |         |   |         |          |          |   |         |          |         |   |          |         |          |
| H                                                                                                                                                                                                          | -0.12662                                                                                                                                                                                                                                                                                                                                                                                                                                                                                                                                                                                                                                                                                                                                                                                                                                                                                                                                                                                                                                                                                                                                                                                                                                                                                                                                                                                                                                                                                                                         | -1.30361 | 1.09516  |         |          |   |          |         |          |   |          |         |          |   |          |         |          |   |          |         |          |   |          |         |          |   |          |         |          |   |          |          |          |   |          |          |          |   |          |          |          |   |          |          |          |   |          |          |         |   |         |          |         |   |         |          |          |   |          |          |          |   |          |          |          |   |         |          |         |   |         |          |          |   |         |          |         |   |          |         |          |
| H                                                                                                                                                                                                          | -0.01123                                                                                                                                                                                                                                                                                                                                                                                                                                                                                                                                                                                                                                                                                                                                                                                                                                                                                                                                                                                                                                                                                                                                                                                                                                                                                                                                                                                                                                                                                                                         | -1.41372 | -0.69060 |         |          |   |          |         |          |   |          |         |          |   |          |         |          |   |          |         |          |   |          |         |          |   |          |         |          |   |          |          |          |   |          |          |          |   |          |          |          |   |          |          |          |   |          |          |         |   |         |          |         |   |         |          |          |   |          |          |          |   |          |          |          |   |         |          |         |   |         |          |          |   |         |          |         |   |          |         |          |
| <p style="text-align: center;">Molecule: <b>1d</b></p>  <p style="text-align: center;">Energy = -532.391294 Hartree</p> | <p style="text-align: center;">20</p> <table border="1"> <tbody> <tr><td>C</td><td>-0.87659</td><td>1.25066</td><td>-1.11717</td></tr> <tr><td>O</td><td>-0.27791</td><td>1.27253</td><td>-2.18652</td></tr> <tr><td>N</td><td>-1.79100</td><td>2.18165</td><td>-0.63729</td></tr> <tr><td>N</td><td>-0.80118</td><td>0.29810</td><td>-0.07186</td></tr> <tr><td>C</td><td>-2.26133</td><td>1.83561</td><td>0.62229</td></tr> <tr><td>C</td><td>-1.65012</td><td>0.67890</td><td>0.97421</td></tr> <tr><td>H</td><td>-3.00374</td><td>2.41998</td><td>1.15112</td></tr> <tr><td>H</td><td>-1.78059</td><td>0.06809</td><td>1.85735</td></tr> <tr><td>C</td><td>0.05711</td><td>-0.82608</td><td>-0.05673</td></tr> <tr><td>C</td><td>0.49140</td><td>-1.35037</td><td>1.17005</td></tr> <tr><td>C</td><td>0.47007</td><td>-1.42670</td><td>-1.25548</td></tr> <tr><td>C</td><td>1.31456</td><td>-2.47524</td><td>1.19625</td></tr> <tr><td>H</td><td>0.20464</td><td>-0.86732</td><td>2.10442</td></tr> <tr><td>C</td><td>1.30252</td><td>-2.54436</td><td>-1.21263</td></tr> <tr><td>H</td><td>0.14753</td><td>-1.00382</td><td>-2.20415</td></tr> <tr><td>C</td><td>1.72551</td><td>-3.07889</td><td>0.00638</td></tr> <tr><td>H</td><td>1.64598</td><td>-2.87240</td><td>2.15704</td></tr> <tr><td>H</td><td>1.61923</td><td>-3.00446</td><td>-2.15007</td></tr> <tr><td>H</td><td>2.37442</td><td>-3.95526</td><td>0.02925</td></tr> <tr><td>H</td><td>-2.04551</td><td>2.99640</td><td>-1.18044</td></tr> </tbody> </table> | C        | -0.87659 | 1.25066 | -1.11717 | O | -0.27791 | 1.27253 | -2.18652 | N | -1.79100 | 2.18165 | -0.63729 | N | -0.80118 | 0.29810 | -0.07186 | C | -2.26133 | 1.83561 | 0.62229  | C | -1.65012 | 0.67890 | 0.97421  | H | -3.00374 | 2.41998 | 1.15112  | H | -1.78059 | 0.06809  | 1.85735  | C | 0.05711  | -0.82608 | -0.05673 | C | 0.49140  | -1.35037 | 1.17005  | C | 0.47007  | -1.42670 | -1.25548 | C | 1.31456  | -2.47524 | 1.19625 | H | 0.20464 | -0.86732 | 2.10442 | C | 1.30252 | -2.54436 | -1.21263 | H | 0.14753  | -1.00382 | -2.20415 | C | 1.72551  | -3.07889 | 0.00638  | H | 1.64598 | -2.87240 | 2.15704 | H | 1.61923 | -3.00446 | -2.15007 | H | 2.37442 | -3.95526 | 0.02925 | H | -2.04551 | 2.99640 | -1.18044 |
| C                                                                                                                                                                                                          | -0.87659                                                                                                                                                                                                                                                                                                                                                                                                                                                                                                                                                                                                                                                                                                                                                                                                                                                                                                                                                                                                                                                                                                                                                                                                                                                                                                                                                                                                                                                                                                                         | 1.25066  | -1.11717 |         |          |   |          |         |          |   |          |         |          |   |          |         |          |   |          |         |          |   |          |         |          |   |          |         |          |   |          |          |          |   |          |          |          |   |          |          |          |   |          |          |          |   |          |          |         |   |         |          |         |   |         |          |          |   |          |          |          |   |          |          |          |   |         |          |         |   |         |          |          |   |         |          |         |   |          |         |          |
| O                                                                                                                                                                                                          | -0.27791                                                                                                                                                                                                                                                                                                                                                                                                                                                                                                                                                                                                                                                                                                                                                                                                                                                                                                                                                                                                                                                                                                                                                                                                                                                                                                                                                                                                                                                                                                                         | 1.27253  | -2.18652 |         |          |   |          |         |          |   |          |         |          |   |          |         |          |   |          |         |          |   |          |         |          |   |          |         |          |   |          |          |          |   |          |          |          |   |          |          |          |   |          |          |          |   |          |          |         |   |         |          |         |   |         |          |          |   |          |          |          |   |          |          |          |   |         |          |         |   |         |          |          |   |         |          |         |   |          |         |          |
| N                                                                                                                                                                                                          | -1.79100                                                                                                                                                                                                                                                                                                                                                                                                                                                                                                                                                                                                                                                                                                                                                                                                                                                                                                                                                                                                                                                                                                                                                                                                                                                                                                                                                                                                                                                                                                                         | 2.18165  | -0.63729 |         |          |   |          |         |          |   |          |         |          |   |          |         |          |   |          |         |          |   |          |         |          |   |          |         |          |   |          |          |          |   |          |          |          |   |          |          |          |   |          |          |          |   |          |          |         |   |         |          |         |   |         |          |          |   |          |          |          |   |          |          |          |   |         |          |         |   |         |          |          |   |         |          |         |   |          |         |          |
| N                                                                                                                                                                                                          | -0.80118                                                                                                                                                                                                                                                                                                                                                                                                                                                                                                                                                                                                                                                                                                                                                                                                                                                                                                                                                                                                                                                                                                                                                                                                                                                                                                                                                                                                                                                                                                                         | 0.29810  | -0.07186 |         |          |   |          |         |          |   |          |         |          |   |          |         |          |   |          |         |          |   |          |         |          |   |          |         |          |   |          |          |          |   |          |          |          |   |          |          |          |   |          |          |          |   |          |          |         |   |         |          |         |   |         |          |          |   |          |          |          |   |          |          |          |   |         |          |         |   |         |          |          |   |         |          |         |   |          |         |          |
| C                                                                                                                                                                                                          | -2.26133                                                                                                                                                                                                                                                                                                                                                                                                                                                                                                                                                                                                                                                                                                                                                                                                                                                                                                                                                                                                                                                                                                                                                                                                                                                                                                                                                                                                                                                                                                                         | 1.83561  | 0.62229  |         |          |   |          |         |          |   |          |         |          |   |          |         |          |   |          |         |          |   |          |         |          |   |          |         |          |   |          |          |          |   |          |          |          |   |          |          |          |   |          |          |          |   |          |          |         |   |         |          |         |   |         |          |          |   |          |          |          |   |          |          |          |   |         |          |         |   |         |          |          |   |         |          |         |   |          |         |          |
| C                                                                                                                                                                                                          | -1.65012                                                                                                                                                                                                                                                                                                                                                                                                                                                                                                                                                                                                                                                                                                                                                                                                                                                                                                                                                                                                                                                                                                                                                                                                                                                                                                                                                                                                                                                                                                                         | 0.67890  | 0.97421  |         |          |   |          |         |          |   |          |         |          |   |          |         |          |   |          |         |          |   |          |         |          |   |          |         |          |   |          |          |          |   |          |          |          |   |          |          |          |   |          |          |          |   |          |          |         |   |         |          |         |   |         |          |          |   |          |          |          |   |          |          |          |   |         |          |         |   |         |          |          |   |         |          |         |   |          |         |          |
| H                                                                                                                                                                                                          | -3.00374                                                                                                                                                                                                                                                                                                                                                                                                                                                                                                                                                                                                                                                                                                                                                                                                                                                                                                                                                                                                                                                                                                                                                                                                                                                                                                                                                                                                                                                                                                                         | 2.41998  | 1.15112  |         |          |   |          |         |          |   |          |         |          |   |          |         |          |   |          |         |          |   |          |         |          |   |          |         |          |   |          |          |          |   |          |          |          |   |          |          |          |   |          |          |          |   |          |          |         |   |         |          |         |   |         |          |          |   |          |          |          |   |          |          |          |   |         |          |         |   |         |          |          |   |         |          |         |   |          |         |          |
| H                                                                                                                                                                                                          | -1.78059                                                                                                                                                                                                                                                                                                                                                                                                                                                                                                                                                                                                                                                                                                                                                                                                                                                                                                                                                                                                                                                                                                                                                                                                                                                                                                                                                                                                                                                                                                                         | 0.06809  | 1.85735  |         |          |   |          |         |          |   |          |         |          |   |          |         |          |   |          |         |          |   |          |         |          |   |          |         |          |   |          |          |          |   |          |          |          |   |          |          |          |   |          |          |          |   |          |          |         |   |         |          |         |   |         |          |          |   |          |          |          |   |          |          |          |   |         |          |         |   |         |          |          |   |         |          |         |   |          |         |          |
| C                                                                                                                                                                                                          | 0.05711                                                                                                                                                                                                                                                                                                                                                                                                                                                                                                                                                                                                                                                                                                                                                                                                                                                                                                                                                                                                                                                                                                                                                                                                                                                                                                                                                                                                                                                                                                                          | -0.82608 | -0.05673 |         |          |   |          |         |          |   |          |         |          |   |          |         |          |   |          |         |          |   |          |         |          |   |          |         |          |   |          |          |          |   |          |          |          |   |          |          |          |   |          |          |          |   |          |          |         |   |         |          |         |   |         |          |          |   |          |          |          |   |          |          |          |   |         |          |         |   |         |          |          |   |         |          |         |   |          |         |          |
| C                                                                                                                                                                                                          | 0.49140                                                                                                                                                                                                                                                                                                                                                                                                                                                                                                                                                                                                                                                                                                                                                                                                                                                                                                                                                                                                                                                                                                                                                                                                                                                                                                                                                                                                                                                                                                                          | -1.35037 | 1.17005  |         |          |   |          |         |          |   |          |         |          |   |          |         |          |   |          |         |          |   |          |         |          |   |          |         |          |   |          |          |          |   |          |          |          |   |          |          |          |   |          |          |          |   |          |          |         |   |         |          |         |   |         |          |          |   |          |          |          |   |          |          |          |   |         |          |         |   |         |          |          |   |         |          |         |   |          |         |          |
| C                                                                                                                                                                                                          | 0.47007                                                                                                                                                                                                                                                                                                                                                                                                                                                                                                                                                                                                                                                                                                                                                                                                                                                                                                                                                                                                                                                                                                                                                                                                                                                                                                                                                                                                                                                                                                                          | -1.42670 | -1.25548 |         |          |   |          |         |          |   |          |         |          |   |          |         |          |   |          |         |          |   |          |         |          |   |          |         |          |   |          |          |          |   |          |          |          |   |          |          |          |   |          |          |          |   |          |          |         |   |         |          |         |   |         |          |          |   |          |          |          |   |          |          |          |   |         |          |         |   |         |          |          |   |         |          |         |   |          |         |          |
| C                                                                                                                                                                                                          | 1.31456                                                                                                                                                                                                                                                                                                                                                                                                                                                                                                                                                                                                                                                                                                                                                                                                                                                                                                                                                                                                                                                                                                                                                                                                                                                                                                                                                                                                                                                                                                                          | -2.47524 | 1.19625  |         |          |   |          |         |          |   |          |         |          |   |          |         |          |   |          |         |          |   |          |         |          |   |          |         |          |   |          |          |          |   |          |          |          |   |          |          |          |   |          |          |          |   |          |          |         |   |         |          |         |   |         |          |          |   |          |          |          |   |          |          |          |   |         |          |         |   |         |          |          |   |         |          |         |   |          |         |          |
| H                                                                                                                                                                                                          | 0.20464                                                                                                                                                                                                                                                                                                                                                                                                                                                                                                                                                                                                                                                                                                                                                                                                                                                                                                                                                                                                                                                                                                                                                                                                                                                                                                                                                                                                                                                                                                                          | -0.86732 | 2.10442  |         |          |   |          |         |          |   |          |         |          |   |          |         |          |   |          |         |          |   |          |         |          |   |          |         |          |   |          |          |          |   |          |          |          |   |          |          |          |   |          |          |          |   |          |          |         |   |         |          |         |   |         |          |          |   |          |          |          |   |          |          |          |   |         |          |         |   |         |          |          |   |         |          |         |   |          |         |          |
| C                                                                                                                                                                                                          | 1.30252                                                                                                                                                                                                                                                                                                                                                                                                                                                                                                                                                                                                                                                                                                                                                                                                                                                                                                                                                                                                                                                                                                                                                                                                                                                                                                                                                                                                                                                                                                                          | -2.54436 | -1.21263 |         |          |   |          |         |          |   |          |         |          |   |          |         |          |   |          |         |          |   |          |         |          |   |          |         |          |   |          |          |          |   |          |          |          |   |          |          |          |   |          |          |          |   |          |          |         |   |         |          |         |   |         |          |          |   |          |          |          |   |          |          |          |   |         |          |         |   |         |          |          |   |         |          |         |   |          |         |          |
| H                                                                                                                                                                                                          | 0.14753                                                                                                                                                                                                                                                                                                                                                                                                                                                                                                                                                                                                                                                                                                                                                                                                                                                                                                                                                                                                                                                                                                                                                                                                                                                                                                                                                                                                                                                                                                                          | -1.00382 | -2.20415 |         |          |   |          |         |          |   |          |         |          |   |          |         |          |   |          |         |          |   |          |         |          |   |          |         |          |   |          |          |          |   |          |          |          |   |          |          |          |   |          |          |          |   |          |          |         |   |         |          |         |   |         |          |          |   |          |          |          |   |          |          |          |   |         |          |         |   |         |          |          |   |         |          |         |   |          |         |          |
| C                                                                                                                                                                                                          | 1.72551                                                                                                                                                                                                                                                                                                                                                                                                                                                                                                                                                                                                                                                                                                                                                                                                                                                                                                                                                                                                                                                                                                                                                                                                                                                                                                                                                                                                                                                                                                                          | -3.07889 | 0.00638  |         |          |   |          |         |          |   |          |         |          |   |          |         |          |   |          |         |          |   |          |         |          |   |          |         |          |   |          |          |          |   |          |          |          |   |          |          |          |   |          |          |          |   |          |          |         |   |         |          |         |   |         |          |          |   |          |          |          |   |          |          |          |   |         |          |         |   |         |          |          |   |         |          |         |   |          |         |          |
| H                                                                                                                                                                                                          | 1.64598                                                                                                                                                                                                                                                                                                                                                                                                                                                                                                                                                                                                                                                                                                                                                                                                                                                                                                                                                                                                                                                                                                                                                                                                                                                                                                                                                                                                                                                                                                                          | -2.87240 | 2.15704  |         |          |   |          |         |          |   |          |         |          |   |          |         |          |   |          |         |          |   |          |         |          |   |          |         |          |   |          |          |          |   |          |          |          |   |          |          |          |   |          |          |          |   |          |          |         |   |         |          |         |   |         |          |          |   |          |          |          |   |          |          |          |   |         |          |         |   |         |          |          |   |         |          |         |   |          |         |          |
| H                                                                                                                                                                                                          | 1.61923                                                                                                                                                                                                                                                                                                                                                                                                                                                                                                                                                                                                                                                                                                                                                                                                                                                                                                                                                                                                                                                                                                                                                                                                                                                                                                                                                                                                                                                                                                                          | -3.00446 | -2.15007 |         |          |   |          |         |          |   |          |         |          |   |          |         |          |   |          |         |          |   |          |         |          |   |          |         |          |   |          |          |          |   |          |          |          |   |          |          |          |   |          |          |          |   |          |          |         |   |         |          |         |   |         |          |          |   |          |          |          |   |          |          |          |   |         |          |         |   |         |          |          |   |         |          |         |   |          |         |          |
| H                                                                                                                                                                                                          | 2.37442                                                                                                                                                                                                                                                                                                                                                                                                                                                                                                                                                                                                                                                                                                                                                                                                                                                                                                                                                                                                                                                                                                                                                                                                                                                                                                                                                                                                                                                                                                                          | -3.95526 | 0.02925  |         |          |   |          |         |          |   |          |         |          |   |          |         |          |   |          |         |          |   |          |         |          |   |          |         |          |   |          |          |          |   |          |          |          |   |          |          |          |   |          |          |          |   |          |          |         |   |         |          |         |   |         |          |          |   |          |          |          |   |          |          |          |   |         |          |         |   |         |          |          |   |         |          |         |   |          |         |          |
| H                                                                                                                                                                                                          | -2.04551                                                                                                                                                                                                                                                                                                                                                                                                                                                                                                                                                                                                                                                                                                                                                                                                                                                                                                                                                                                                                                                                                                                                                                                                                                                                                                                                                                                                                                                                                                                         | 2.99640  | -1.18044 |         |          |   |          |         |          |   |          |         |          |   |          |         |          |   |          |         |          |   |          |         |          |   |          |         |          |   |          |          |          |   |          |          |          |   |          |          |          |   |          |          |          |   |          |          |         |   |         |          |         |   |         |          |          |   |          |          |          |   |          |          |          |   |         |          |         |   |         |          |          |   |         |          |         |   |          |         |          |

|                                                                                                                                                                                                            |                                                                                                                                                                                                                                                                                                                                                                                                                                                                                                                                                                                                                                                                                                                                                                                                                                                                                                                                                                                                                                                                                                                                                                                                                                                                                                                                                                                                                                                                                                                                                                                                                                                                                                                                                    |          |          |         |          |   |          |         |          |   |          |         |          |   |          |         |          |   |          |         |         |   |          |         |         |   |          |         |         |   |          |         |         |   |          |         |          |   |          |         |          |   |          |         |          |   |          |         |          |   |          |          |          |   |          |          |          |   |          |          |          |   |          |          |          |   |          |          |          |   |          |          |          |   |          |          |          |   |         |          |          |   |         |          |         |   |         |          |          |   |         |          |         |
|------------------------------------------------------------------------------------------------------------------------------------------------------------------------------------------------------------|----------------------------------------------------------------------------------------------------------------------------------------------------------------------------------------------------------------------------------------------------------------------------------------------------------------------------------------------------------------------------------------------------------------------------------------------------------------------------------------------------------------------------------------------------------------------------------------------------------------------------------------------------------------------------------------------------------------------------------------------------------------------------------------------------------------------------------------------------------------------------------------------------------------------------------------------------------------------------------------------------------------------------------------------------------------------------------------------------------------------------------------------------------------------------------------------------------------------------------------------------------------------------------------------------------------------------------------------------------------------------------------------------------------------------------------------------------------------------------------------------------------------------------------------------------------------------------------------------------------------------------------------------------------------------------------------------------------------------------------------------|----------|----------|---------|----------|---|----------|---------|----------|---|----------|---------|----------|---|----------|---------|----------|---|----------|---------|---------|---|----------|---------|---------|---|----------|---------|---------|---|----------|---------|---------|---|----------|---------|----------|---|----------|---------|----------|---|----------|---------|----------|---|----------|---------|----------|---|----------|----------|----------|---|----------|----------|----------|---|----------|----------|----------|---|----------|----------|----------|---|----------|----------|----------|---|----------|----------|----------|---|----------|----------|----------|---|---------|----------|----------|---|---------|----------|---------|---|---------|----------|----------|---|---------|----------|---------|
| <p style="text-align: center;">Molecule: <b>1d'</b></p> 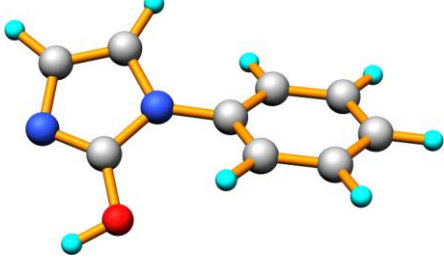 <p style="text-align: center;">Energy = -531.924818 Hartree</p>  | <p style="text-align: center;">20</p> <table border="1"> <tbody> <tr><td>C</td><td>-0.92270</td><td>1.19546</td><td>-1.01725</td></tr> <tr><td>O</td><td>-0.37641</td><td>1.12534</td><td>-2.25114</td></tr> <tr><td>N</td><td>-0.30635</td><td>0.93942</td><td>0.11199</td></tr> <tr><td>N</td><td>-2.24772</td><td>1.52560</td><td>-0.85314</td></tr> <tr><td>C</td><td>-1.27617</td><td>1.11190</td><td>1.08995</td></tr> <tr><td>C</td><td>-2.47374</td><td>1.46354</td><td>0.53003</td></tr> <tr><td>H</td><td>-1.04282</td><td>0.98370</td><td>2.14233</td></tr> <tr><td>H</td><td>-3.43744</td><td>1.72036</td><td>0.95248</td></tr> <tr><td>C</td><td>-3.22260</td><td>1.80549</td><td>-1.84618</td></tr> <tr><td>C</td><td>-4.53639</td><td>1.35520</td><td>-1.66157</td></tr> <tr><td>C</td><td>-2.88834</td><td>2.53876</td><td>-2.99143</td></tr> <tr><td>C</td><td>-5.51083</td><td>1.64664</td><td>-2.61526</td></tr> <tr><td>H</td><td>-4.78439</td><td>0.76369</td><td>-0.77982</td></tr> <tr><td>C</td><td>-3.86833</td><td>2.81093</td><td>-3.94532</td></tr> <tr><td>H</td><td>-1.86788</td><td>2.89222</td><td>-3.12895</td></tr> <tr><td>C</td><td>-5.18156</td><td>2.37222</td><td>-3.76199</td></tr> <tr><td>H</td><td>-6.53159</td><td>1.29209</td><td>-2.46459</td></tr> <tr><td>H</td><td>-3.60175</td><td>3.38175</td><td>-4.83609</td></tr> <tr><td>H</td><td>-5.94409</td><td>2.59344</td><td>-4.50979</td></tr> <tr><td>H</td><td>0.54009</td><td>0.81927</td><td>-2.10827</td></tr> </tbody> </table>                                                                                                                                                                                                               | C        | -0.92270 | 1.19546 | -1.01725 | O | -0.37641 | 1.12534 | -2.25114 | N | -0.30635 | 0.93942 | 0.11199  | N | -2.24772 | 1.52560 | -0.85314 | C | -1.27617 | 1.11190 | 1.08995 | C | -2.47374 | 1.46354 | 0.53003 | H | -1.04282 | 0.98370 | 2.14233 | H | -3.43744 | 1.72036 | 0.95248 | C | -3.22260 | 1.80549 | -1.84618 | C | -4.53639 | 1.35520 | -1.66157 | C | -2.88834 | 2.53876 | -2.99143 | C | -5.51083 | 1.64664 | -2.61526 | H | -4.78439 | 0.76369  | -0.77982 | C | -3.86833 | 2.81093  | -3.94532 | H | -1.86788 | 2.89222  | -3.12895 | C | -5.18156 | 2.37222  | -3.76199 | H | -6.53159 | 1.29209  | -2.46459 | H | -3.60175 | 3.38175  | -4.83609 | H | -5.94409 | 2.59344  | -4.50979 | H | 0.54009 | 0.81927  | -2.10827 |   |         |          |         |   |         |          |          |   |         |          |         |
| C                                                                                                                                                                                                          | -0.92270                                                                                                                                                                                                                                                                                                                                                                                                                                                                                                                                                                                                                                                                                                                                                                                                                                                                                                                                                                                                                                                                                                                                                                                                                                                                                                                                                                                                                                                                                                                                                                                                                                                                                                                                           | 1.19546  | -1.01725 |         |          |   |          |         |          |   |          |         |          |   |          |         |          |   |          |         |         |   |          |         |         |   |          |         |         |   |          |         |         |   |          |         |          |   |          |         |          |   |          |         |          |   |          |         |          |   |          |          |          |   |          |          |          |   |          |          |          |   |          |          |          |   |          |          |          |   |          |          |          |   |          |          |          |   |         |          |          |   |         |          |         |   |         |          |          |   |         |          |         |
| O                                                                                                                                                                                                          | -0.37641                                                                                                                                                                                                                                                                                                                                                                                                                                                                                                                                                                                                                                                                                                                                                                                                                                                                                                                                                                                                                                                                                                                                                                                                                                                                                                                                                                                                                                                                                                                                                                                                                                                                                                                                           | 1.12534  | -2.25114 |         |          |   |          |         |          |   |          |         |          |   |          |         |          |   |          |         |         |   |          |         |         |   |          |         |         |   |          |         |         |   |          |         |          |   |          |         |          |   |          |         |          |   |          |         |          |   |          |          |          |   |          |          |          |   |          |          |          |   |          |          |          |   |          |          |          |   |          |          |          |   |          |          |          |   |         |          |          |   |         |          |         |   |         |          |          |   |         |          |         |
| N                                                                                                                                                                                                          | -0.30635                                                                                                                                                                                                                                                                                                                                                                                                                                                                                                                                                                                                                                                                                                                                                                                                                                                                                                                                                                                                                                                                                                                                                                                                                                                                                                                                                                                                                                                                                                                                                                                                                                                                                                                                           | 0.93942  | 0.11199  |         |          |   |          |         |          |   |          |         |          |   |          |         |          |   |          |         |         |   |          |         |         |   |          |         |         |   |          |         |         |   |          |         |          |   |          |         |          |   |          |         |          |   |          |         |          |   |          |          |          |   |          |          |          |   |          |          |          |   |          |          |          |   |          |          |          |   |          |          |          |   |          |          |          |   |         |          |          |   |         |          |         |   |         |          |          |   |         |          |         |
| N                                                                                                                                                                                                          | -2.24772                                                                                                                                                                                                                                                                                                                                                                                                                                                                                                                                                                                                                                                                                                                                                                                                                                                                                                                                                                                                                                                                                                                                                                                                                                                                                                                                                                                                                                                                                                                                                                                                                                                                                                                                           | 1.52560  | -0.85314 |         |          |   |          |         |          |   |          |         |          |   |          |         |          |   |          |         |         |   |          |         |         |   |          |         |         |   |          |         |         |   |          |         |          |   |          |         |          |   |          |         |          |   |          |         |          |   |          |          |          |   |          |          |          |   |          |          |          |   |          |          |          |   |          |          |          |   |          |          |          |   |          |          |          |   |         |          |          |   |         |          |         |   |         |          |          |   |         |          |         |
| C                                                                                                                                                                                                          | -1.27617                                                                                                                                                                                                                                                                                                                                                                                                                                                                                                                                                                                                                                                                                                                                                                                                                                                                                                                                                                                                                                                                                                                                                                                                                                                                                                                                                                                                                                                                                                                                                                                                                                                                                                                                           | 1.11190  | 1.08995  |         |          |   |          |         |          |   |          |         |          |   |          |         |          |   |          |         |         |   |          |         |         |   |          |         |         |   |          |         |         |   |          |         |          |   |          |         |          |   |          |         |          |   |          |         |          |   |          |          |          |   |          |          |          |   |          |          |          |   |          |          |          |   |          |          |          |   |          |          |          |   |          |          |          |   |         |          |          |   |         |          |         |   |         |          |          |   |         |          |         |
| C                                                                                                                                                                                                          | -2.47374                                                                                                                                                                                                                                                                                                                                                                                                                                                                                                                                                                                                                                                                                                                                                                                                                                                                                                                                                                                                                                                                                                                                                                                                                                                                                                                                                                                                                                                                                                                                                                                                                                                                                                                                           | 1.46354  | 0.53003  |         |          |   |          |         |          |   |          |         |          |   |          |         |          |   |          |         |         |   |          |         |         |   |          |         |         |   |          |         |         |   |          |         |          |   |          |         |          |   |          |         |          |   |          |         |          |   |          |          |          |   |          |          |          |   |          |          |          |   |          |          |          |   |          |          |          |   |          |          |          |   |          |          |          |   |         |          |          |   |         |          |         |   |         |          |          |   |         |          |         |
| H                                                                                                                                                                                                          | -1.04282                                                                                                                                                                                                                                                                                                                                                                                                                                                                                                                                                                                                                                                                                                                                                                                                                                                                                                                                                                                                                                                                                                                                                                                                                                                                                                                                                                                                                                                                                                                                                                                                                                                                                                                                           | 0.98370  | 2.14233  |         |          |   |          |         |          |   |          |         |          |   |          |         |          |   |          |         |         |   |          |         |         |   |          |         |         |   |          |         |         |   |          |         |          |   |          |         |          |   |          |         |          |   |          |         |          |   |          |          |          |   |          |          |          |   |          |          |          |   |          |          |          |   |          |          |          |   |          |          |          |   |          |          |          |   |         |          |          |   |         |          |         |   |         |          |          |   |         |          |         |
| H                                                                                                                                                                                                          | -3.43744                                                                                                                                                                                                                                                                                                                                                                                                                                                                                                                                                                                                                                                                                                                                                                                                                                                                                                                                                                                                                                                                                                                                                                                                                                                                                                                                                                                                                                                                                                                                                                                                                                                                                                                                           | 1.72036  | 0.95248  |         |          |   |          |         |          |   |          |         |          |   |          |         |          |   |          |         |         |   |          |         |         |   |          |         |         |   |          |         |         |   |          |         |          |   |          |         |          |   |          |         |          |   |          |         |          |   |          |          |          |   |          |          |          |   |          |          |          |   |          |          |          |   |          |          |          |   |          |          |          |   |          |          |          |   |         |          |          |   |         |          |         |   |         |          |          |   |         |          |         |
| C                                                                                                                                                                                                          | -3.22260                                                                                                                                                                                                                                                                                                                                                                                                                                                                                                                                                                                                                                                                                                                                                                                                                                                                                                                                                                                                                                                                                                                                                                                                                                                                                                                                                                                                                                                                                                                                                                                                                                                                                                                                           | 1.80549  | -1.84618 |         |          |   |          |         |          |   |          |         |          |   |          |         |          |   |          |         |         |   |          |         |         |   |          |         |         |   |          |         |         |   |          |         |          |   |          |         |          |   |          |         |          |   |          |         |          |   |          |          |          |   |          |          |          |   |          |          |          |   |          |          |          |   |          |          |          |   |          |          |          |   |          |          |          |   |         |          |          |   |         |          |         |   |         |          |          |   |         |          |         |
| C                                                                                                                                                                                                          | -4.53639                                                                                                                                                                                                                                                                                                                                                                                                                                                                                                                                                                                                                                                                                                                                                                                                                                                                                                                                                                                                                                                                                                                                                                                                                                                                                                                                                                                                                                                                                                                                                                                                                                                                                                                                           | 1.35520  | -1.66157 |         |          |   |          |         |          |   |          |         |          |   |          |         |          |   |          |         |         |   |          |         |         |   |          |         |         |   |          |         |         |   |          |         |          |   |          |         |          |   |          |         |          |   |          |         |          |   |          |          |          |   |          |          |          |   |          |          |          |   |          |          |          |   |          |          |          |   |          |          |          |   |          |          |          |   |         |          |          |   |         |          |         |   |         |          |          |   |         |          |         |
| C                                                                                                                                                                                                          | -2.88834                                                                                                                                                                                                                                                                                                                                                                                                                                                                                                                                                                                                                                                                                                                                                                                                                                                                                                                                                                                                                                                                                                                                                                                                                                                                                                                                                                                                                                                                                                                                                                                                                                                                                                                                           | 2.53876  | -2.99143 |         |          |   |          |         |          |   |          |         |          |   |          |         |          |   |          |         |         |   |          |         |         |   |          |         |         |   |          |         |         |   |          |         |          |   |          |         |          |   |          |         |          |   |          |         |          |   |          |          |          |   |          |          |          |   |          |          |          |   |          |          |          |   |          |          |          |   |          |          |          |   |          |          |          |   |         |          |          |   |         |          |         |   |         |          |          |   |         |          |         |
| C                                                                                                                                                                                                          | -5.51083                                                                                                                                                                                                                                                                                                                                                                                                                                                                                                                                                                                                                                                                                                                                                                                                                                                                                                                                                                                                                                                                                                                                                                                                                                                                                                                                                                                                                                                                                                                                                                                                                                                                                                                                           | 1.64664  | -2.61526 |         |          |   |          |         |          |   |          |         |          |   |          |         |          |   |          |         |         |   |          |         |         |   |          |         |         |   |          |         |         |   |          |         |          |   |          |         |          |   |          |         |          |   |          |         |          |   |          |          |          |   |          |          |          |   |          |          |          |   |          |          |          |   |          |          |          |   |          |          |          |   |          |          |          |   |         |          |          |   |         |          |         |   |         |          |          |   |         |          |         |
| H                                                                                                                                                                                                          | -4.78439                                                                                                                                                                                                                                                                                                                                                                                                                                                                                                                                                                                                                                                                                                                                                                                                                                                                                                                                                                                                                                                                                                                                                                                                                                                                                                                                                                                                                                                                                                                                                                                                                                                                                                                                           | 0.76369  | -0.77982 |         |          |   |          |         |          |   |          |         |          |   |          |         |          |   |          |         |         |   |          |         |         |   |          |         |         |   |          |         |         |   |          |         |          |   |          |         |          |   |          |         |          |   |          |         |          |   |          |          |          |   |          |          |          |   |          |          |          |   |          |          |          |   |          |          |          |   |          |          |          |   |          |          |          |   |         |          |          |   |         |          |         |   |         |          |          |   |         |          |         |
| C                                                                                                                                                                                                          | -3.86833                                                                                                                                                                                                                                                                                                                                                                                                                                                                                                                                                                                                                                                                                                                                                                                                                                                                                                                                                                                                                                                                                                                                                                                                                                                                                                                                                                                                                                                                                                                                                                                                                                                                                                                                           | 2.81093  | -3.94532 |         |          |   |          |         |          |   |          |         |          |   |          |         |          |   |          |         |         |   |          |         |         |   |          |         |         |   |          |         |         |   |          |         |          |   |          |         |          |   |          |         |          |   |          |         |          |   |          |          |          |   |          |          |          |   |          |          |          |   |          |          |          |   |          |          |          |   |          |          |          |   |          |          |          |   |         |          |          |   |         |          |         |   |         |          |          |   |         |          |         |
| H                                                                                                                                                                                                          | -1.86788                                                                                                                                                                                                                                                                                                                                                                                                                                                                                                                                                                                                                                                                                                                                                                                                                                                                                                                                                                                                                                                                                                                                                                                                                                                                                                                                                                                                                                                                                                                                                                                                                                                                                                                                           | 2.89222  | -3.12895 |         |          |   |          |         |          |   |          |         |          |   |          |         |          |   |          |         |         |   |          |         |         |   |          |         |         |   |          |         |         |   |          |         |          |   |          |         |          |   |          |         |          |   |          |         |          |   |          |          |          |   |          |          |          |   |          |          |          |   |          |          |          |   |          |          |          |   |          |          |          |   |          |          |          |   |         |          |          |   |         |          |         |   |         |          |          |   |         |          |         |
| C                                                                                                                                                                                                          | -5.18156                                                                                                                                                                                                                                                                                                                                                                                                                                                                                                                                                                                                                                                                                                                                                                                                                                                                                                                                                                                                                                                                                                                                                                                                                                                                                                                                                                                                                                                                                                                                                                                                                                                                                                                                           | 2.37222  | -3.76199 |         |          |   |          |         |          |   |          |         |          |   |          |         |          |   |          |         |         |   |          |         |         |   |          |         |         |   |          |         |         |   |          |         |          |   |          |         |          |   |          |         |          |   |          |         |          |   |          |          |          |   |          |          |          |   |          |          |          |   |          |          |          |   |          |          |          |   |          |          |          |   |          |          |          |   |         |          |          |   |         |          |         |   |         |          |          |   |         |          |         |
| H                                                                                                                                                                                                          | -6.53159                                                                                                                                                                                                                                                                                                                                                                                                                                                                                                                                                                                                                                                                                                                                                                                                                                                                                                                                                                                                                                                                                                                                                                                                                                                                                                                                                                                                                                                                                                                                                                                                                                                                                                                                           | 1.29209  | -2.46459 |         |          |   |          |         |          |   |          |         |          |   |          |         |          |   |          |         |         |   |          |         |         |   |          |         |         |   |          |         |         |   |          |         |          |   |          |         |          |   |          |         |          |   |          |         |          |   |          |          |          |   |          |          |          |   |          |          |          |   |          |          |          |   |          |          |          |   |          |          |          |   |          |          |          |   |         |          |          |   |         |          |         |   |         |          |          |   |         |          |         |
| H                                                                                                                                                                                                          | -3.60175                                                                                                                                                                                                                                                                                                                                                                                                                                                                                                                                                                                                                                                                                                                                                                                                                                                                                                                                                                                                                                                                                                                                                                                                                                                                                                                                                                                                                                                                                                                                                                                                                                                                                                                                           | 3.38175  | -4.83609 |         |          |   |          |         |          |   |          |         |          |   |          |         |          |   |          |         |         |   |          |         |         |   |          |         |         |   |          |         |         |   |          |         |          |   |          |         |          |   |          |         |          |   |          |         |          |   |          |          |          |   |          |          |          |   |          |          |          |   |          |          |          |   |          |          |          |   |          |          |          |   |          |          |          |   |         |          |          |   |         |          |         |   |         |          |          |   |         |          |         |
| H                                                                                                                                                                                                          | -5.94409                                                                                                                                                                                                                                                                                                                                                                                                                                                                                                                                                                                                                                                                                                                                                                                                                                                                                                                                                                                                                                                                                                                                                                                                                                                                                                                                                                                                                                                                                                                                                                                                                                                                                                                                           | 2.59344  | -4.50979 |         |          |   |          |         |          |   |          |         |          |   |          |         |          |   |          |         |         |   |          |         |         |   |          |         |         |   |          |         |         |   |          |         |          |   |          |         |          |   |          |         |          |   |          |         |          |   |          |          |          |   |          |          |          |   |          |          |          |   |          |          |          |   |          |          |          |   |          |          |          |   |          |          |          |   |         |          |          |   |         |          |         |   |         |          |          |   |         |          |         |
| H                                                                                                                                                                                                          | 0.54009                                                                                                                                                                                                                                                                                                                                                                                                                                                                                                                                                                                                                                                                                                                                                                                                                                                                                                                                                                                                                                                                                                                                                                                                                                                                                                                                                                                                                                                                                                                                                                                                                                                                                                                                            | 0.81927  | -2.10827 |         |          |   |          |         |          |   |          |         |          |   |          |         |          |   |          |         |         |   |          |         |         |   |          |         |         |   |          |         |         |   |          |         |          |   |          |         |          |   |          |         |          |   |          |         |          |   |          |          |          |   |          |          |          |   |          |          |          |   |          |          |          |   |          |          |          |   |          |          |          |   |          |          |          |   |         |          |          |   |         |          |         |   |         |          |          |   |         |          |         |
| <p style="text-align: center;">Molecule: <b>1e</b></p>  <p style="text-align: center;">Energy = -571.678472 Hartree</p> | <p style="text-align: center;">23</p> <table border="1"> <tbody> <tr><td>C</td><td>-0.88022</td><td>1.24666</td><td>-1.11729</td></tr> <tr><td>O</td><td>-0.28374</td><td>1.26450</td><td>-2.19115</td></tr> <tr><td>N</td><td>-1.79543</td><td>2.18807</td><td>-0.64934</td></tr> <tr><td>N</td><td>-0.79677</td><td>0.29892</td><td>-0.07208</td></tr> <tr><td>C</td><td>-2.25435</td><td>1.83748</td><td>0.61333</td></tr> <tr><td>C</td><td>-1.64206</td><td>0.68300</td><td>0.97366</td></tr> <tr><td>H</td><td>-2.99639</td><td>2.42480</td><td>1.14089</td></tr> <tr><td>H</td><td>-1.77110</td><td>0.07757</td><td>1.86054</td></tr> <tr><td>C</td><td>-2.16789</td><td>3.35342</td><td>-1.41888</td></tr> <tr><td>H</td><td>-1.90024</td><td>4.27820</td><td>-0.88680</td></tr> <tr><td>H</td><td>-1.61376</td><td>3.30805</td><td>-2.36445</td></tr> <tr><td>H</td><td>-3.24735</td><td>3.35683</td><td>-1.63068</td></tr> <tr><td>C</td><td>0.06030</td><td>-0.82595</td><td>-0.05722</td></tr> <tr><td>C</td><td>0.49001</td><td>-1.35350</td><td>1.16997</td></tr> <tr><td>C</td><td>0.47657</td><td>-1.42544</td><td>-1.25558</td></tr> <tr><td>C</td><td>1.31119</td><td>-2.47996</td><td>1.19687</td></tr> <tr><td>H</td><td>0.20127</td><td>-0.87226</td><td>2.10464</td></tr> <tr><td>C</td><td>1.30688</td><td>-2.54484</td><td>-1.21198</td></tr> <tr><td>H</td><td>0.15830</td><td>-0.99997</td><td>-2.20454</td></tr> <tr><td>C</td><td>1.72507</td><td>-3.08257</td><td>0.00738</td></tr> <tr><td>H</td><td>1.63868</td><td>-2.87913</td><td>2.15822</td></tr> <tr><td>H</td><td>1.62569</td><td>-3.00369</td><td>-2.14938</td></tr> <tr><td>H</td><td>2.37232</td><td>-3.96019</td><td>0.03087</td></tr> </tbody> </table> | C        | -0.88022 | 1.24666 | -1.11729 | O | -0.28374 | 1.26450 | -2.19115 | N | -1.79543 | 2.18807 | -0.64934 | N | -0.79677 | 0.29892 | -0.07208 | C | -2.25435 | 1.83748 | 0.61333 | C | -1.64206 | 0.68300 | 0.97366 | H | -2.99639 | 2.42480 | 1.14089 | H | -1.77110 | 0.07757 | 1.86054 | C | -2.16789 | 3.35342 | -1.41888 | H | -1.90024 | 4.27820 | -0.88680 | H | -1.61376 | 3.30805 | -2.36445 | H | -3.24735 | 3.35683 | -1.63068 | C | 0.06030  | -0.82595 | -0.05722 | C | 0.49001  | -1.35350 | 1.16997  | C | 0.47657  | -1.42544 | -1.25558 | C | 1.31119  | -2.47996 | 1.19687  | H | 0.20127  | -0.87226 | 2.10464  | C | 1.30688  | -2.54484 | -1.21198 | H | 0.15830  | -0.99997 | -2.20454 | C | 1.72507 | -3.08257 | 0.00738  | H | 1.63868 | -2.87913 | 2.15822 | H | 1.62569 | -3.00369 | -2.14938 | H | 2.37232 | -3.96019 | 0.03087 |
| C                                                                                                                                                                                                          | -0.88022                                                                                                                                                                                                                                                                                                                                                                                                                                                                                                                                                                                                                                                                                                                                                                                                                                                                                                                                                                                                                                                                                                                                                                                                                                                                                                                                                                                                                                                                                                                                                                                                                                                                                                                                           | 1.24666  | -1.11729 |         |          |   |          |         |          |   |          |         |          |   |          |         |          |   |          |         |         |   |          |         |         |   |          |         |         |   |          |         |         |   |          |         |          |   |          |         |          |   |          |         |          |   |          |         |          |   |          |          |          |   |          |          |          |   |          |          |          |   |          |          |          |   |          |          |          |   |          |          |          |   |          |          |          |   |         |          |          |   |         |          |         |   |         |          |          |   |         |          |         |
| O                                                                                                                                                                                                          | -0.28374                                                                                                                                                                                                                                                                                                                                                                                                                                                                                                                                                                                                                                                                                                                                                                                                                                                                                                                                                                                                                                                                                                                                                                                                                                                                                                                                                                                                                                                                                                                                                                                                                                                                                                                                           | 1.26450  | -2.19115 |         |          |   |          |         |          |   |          |         |          |   |          |         |          |   |          |         |         |   |          |         |         |   |          |         |         |   |          |         |         |   |          |         |          |   |          |         |          |   |          |         |          |   |          |         |          |   |          |          |          |   |          |          |          |   |          |          |          |   |          |          |          |   |          |          |          |   |          |          |          |   |          |          |          |   |         |          |          |   |         |          |         |   |         |          |          |   |         |          |         |
| N                                                                                                                                                                                                          | -1.79543                                                                                                                                                                                                                                                                                                                                                                                                                                                                                                                                                                                                                                                                                                                                                                                                                                                                                                                                                                                                                                                                                                                                                                                                                                                                                                                                                                                                                                                                                                                                                                                                                                                                                                                                           | 2.18807  | -0.64934 |         |          |   |          |         |          |   |          |         |          |   |          |         |          |   |          |         |         |   |          |         |         |   |          |         |         |   |          |         |         |   |          |         |          |   |          |         |          |   |          |         |          |   |          |         |          |   |          |          |          |   |          |          |          |   |          |          |          |   |          |          |          |   |          |          |          |   |          |          |          |   |          |          |          |   |         |          |          |   |         |          |         |   |         |          |          |   |         |          |         |
| N                                                                                                                                                                                                          | -0.79677                                                                                                                                                                                                                                                                                                                                                                                                                                                                                                                                                                                                                                                                                                                                                                                                                                                                                                                                                                                                                                                                                                                                                                                                                                                                                                                                                                                                                                                                                                                                                                                                                                                                                                                                           | 0.29892  | -0.07208 |         |          |   |          |         |          |   |          |         |          |   |          |         |          |   |          |         |         |   |          |         |         |   |          |         |         |   |          |         |         |   |          |         |          |   |          |         |          |   |          |         |          |   |          |         |          |   |          |          |          |   |          |          |          |   |          |          |          |   |          |          |          |   |          |          |          |   |          |          |          |   |          |          |          |   |         |          |          |   |         |          |         |   |         |          |          |   |         |          |         |
| C                                                                                                                                                                                                          | -2.25435                                                                                                                                                                                                                                                                                                                                                                                                                                                                                                                                                                                                                                                                                                                                                                                                                                                                                                                                                                                                                                                                                                                                                                                                                                                                                                                                                                                                                                                                                                                                                                                                                                                                                                                                           | 1.83748  | 0.61333  |         |          |   |          |         |          |   |          |         |          |   |          |         |          |   |          |         |         |   |          |         |         |   |          |         |         |   |          |         |         |   |          |         |          |   |          |         |          |   |          |         |          |   |          |         |          |   |          |          |          |   |          |          |          |   |          |          |          |   |          |          |          |   |          |          |          |   |          |          |          |   |          |          |          |   |         |          |          |   |         |          |         |   |         |          |          |   |         |          |         |
| C                                                                                                                                                                                                          | -1.64206                                                                                                                                                                                                                                                                                                                                                                                                                                                                                                                                                                                                                                                                                                                                                                                                                                                                                                                                                                                                                                                                                                                                                                                                                                                                                                                                                                                                                                                                                                                                                                                                                                                                                                                                           | 0.68300  | 0.97366  |         |          |   |          |         |          |   |          |         |          |   |          |         |          |   |          |         |         |   |          |         |         |   |          |         |         |   |          |         |         |   |          |         |          |   |          |         |          |   |          |         |          |   |          |         |          |   |          |          |          |   |          |          |          |   |          |          |          |   |          |          |          |   |          |          |          |   |          |          |          |   |          |          |          |   |         |          |          |   |         |          |         |   |         |          |          |   |         |          |         |
| H                                                                                                                                                                                                          | -2.99639                                                                                                                                                                                                                                                                                                                                                                                                                                                                                                                                                                                                                                                                                                                                                                                                                                                                                                                                                                                                                                                                                                                                                                                                                                                                                                                                                                                                                                                                                                                                                                                                                                                                                                                                           | 2.42480  | 1.14089  |         |          |   |          |         |          |   |          |         |          |   |          |         |          |   |          |         |         |   |          |         |         |   |          |         |         |   |          |         |         |   |          |         |          |   |          |         |          |   |          |         |          |   |          |         |          |   |          |          |          |   |          |          |          |   |          |          |          |   |          |          |          |   |          |          |          |   |          |          |          |   |          |          |          |   |         |          |          |   |         |          |         |   |         |          |          |   |         |          |         |
| H                                                                                                                                                                                                          | -1.77110                                                                                                                                                                                                                                                                                                                                                                                                                                                                                                                                                                                                                                                                                                                                                                                                                                                                                                                                                                                                                                                                                                                                                                                                                                                                                                                                                                                                                                                                                                                                                                                                                                                                                                                                           | 0.07757  | 1.86054  |         |          |   |          |         |          |   |          |         |          |   |          |         |          |   |          |         |         |   |          |         |         |   |          |         |         |   |          |         |         |   |          |         |          |   |          |         |          |   |          |         |          |   |          |         |          |   |          |          |          |   |          |          |          |   |          |          |          |   |          |          |          |   |          |          |          |   |          |          |          |   |          |          |          |   |         |          |          |   |         |          |         |   |         |          |          |   |         |          |         |
| C                                                                                                                                                                                                          | -2.16789                                                                                                                                                                                                                                                                                                                                                                                                                                                                                                                                                                                                                                                                                                                                                                                                                                                                                                                                                                                                                                                                                                                                                                                                                                                                                                                                                                                                                                                                                                                                                                                                                                                                                                                                           | 3.35342  | -1.41888 |         |          |   |          |         |          |   |          |         |          |   |          |         |          |   |          |         |         |   |          |         |         |   |          |         |         |   |          |         |         |   |          |         |          |   |          |         |          |   |          |         |          |   |          |         |          |   |          |          |          |   |          |          |          |   |          |          |          |   |          |          |          |   |          |          |          |   |          |          |          |   |          |          |          |   |         |          |          |   |         |          |         |   |         |          |          |   |         |          |         |
| H                                                                                                                                                                                                          | -1.90024                                                                                                                                                                                                                                                                                                                                                                                                                                                                                                                                                                                                                                                                                                                                                                                                                                                                                                                                                                                                                                                                                                                                                                                                                                                                                                                                                                                                                                                                                                                                                                                                                                                                                                                                           | 4.27820  | -0.88680 |         |          |   |          |         |          |   |          |         |          |   |          |         |          |   |          |         |         |   |          |         |         |   |          |         |         |   |          |         |         |   |          |         |          |   |          |         |          |   |          |         |          |   |          |         |          |   |          |          |          |   |          |          |          |   |          |          |          |   |          |          |          |   |          |          |          |   |          |          |          |   |          |          |          |   |         |          |          |   |         |          |         |   |         |          |          |   |         |          |         |
| H                                                                                                                                                                                                          | -1.61376                                                                                                                                                                                                                                                                                                                                                                                                                                                                                                                                                                                                                                                                                                                                                                                                                                                                                                                                                                                                                                                                                                                                                                                                                                                                                                                                                                                                                                                                                                                                                                                                                                                                                                                                           | 3.30805  | -2.36445 |         |          |   |          |         |          |   |          |         |          |   |          |         |          |   |          |         |         |   |          |         |         |   |          |         |         |   |          |         |         |   |          |         |          |   |          |         |          |   |          |         |          |   |          |         |          |   |          |          |          |   |          |          |          |   |          |          |          |   |          |          |          |   |          |          |          |   |          |          |          |   |          |          |          |   |         |          |          |   |         |          |         |   |         |          |          |   |         |          |         |
| H                                                                                                                                                                                                          | -3.24735                                                                                                                                                                                                                                                                                                                                                                                                                                                                                                                                                                                                                                                                                                                                                                                                                                                                                                                                                                                                                                                                                                                                                                                                                                                                                                                                                                                                                                                                                                                                                                                                                                                                                                                                           | 3.35683  | -1.63068 |         |          |   |          |         |          |   |          |         |          |   |          |         |          |   |          |         |         |   |          |         |         |   |          |         |         |   |          |         |         |   |          |         |          |   |          |         |          |   |          |         |          |   |          |         |          |   |          |          |          |   |          |          |          |   |          |          |          |   |          |          |          |   |          |          |          |   |          |          |          |   |          |          |          |   |         |          |          |   |         |          |         |   |         |          |          |   |         |          |         |
| C                                                                                                                                                                                                          | 0.06030                                                                                                                                                                                                                                                                                                                                                                                                                                                                                                                                                                                                                                                                                                                                                                                                                                                                                                                                                                                                                                                                                                                                                                                                                                                                                                                                                                                                                                                                                                                                                                                                                                                                                                                                            | -0.82595 | -0.05722 |         |          |   |          |         |          |   |          |         |          |   |          |         |          |   |          |         |         |   |          |         |         |   |          |         |         |   |          |         |         |   |          |         |          |   |          |         |          |   |          |         |          |   |          |         |          |   |          |          |          |   |          |          |          |   |          |          |          |   |          |          |          |   |          |          |          |   |          |          |          |   |          |          |          |   |         |          |          |   |         |          |         |   |         |          |          |   |         |          |         |
| C                                                                                                                                                                                                          | 0.49001                                                                                                                                                                                                                                                                                                                                                                                                                                                                                                                                                                                                                                                                                                                                                                                                                                                                                                                                                                                                                                                                                                                                                                                                                                                                                                                                                                                                                                                                                                                                                                                                                                                                                                                                            | -1.35350 | 1.16997  |         |          |   |          |         |          |   |          |         |          |   |          |         |          |   |          |         |         |   |          |         |         |   |          |         |         |   |          |         |         |   |          |         |          |   |          |         |          |   |          |         |          |   |          |         |          |   |          |          |          |   |          |          |          |   |          |          |          |   |          |          |          |   |          |          |          |   |          |          |          |   |          |          |          |   |         |          |          |   |         |          |         |   |         |          |          |   |         |          |         |
| C                                                                                                                                                                                                          | 0.47657                                                                                                                                                                                                                                                                                                                                                                                                                                                                                                                                                                                                                                                                                                                                                                                                                                                                                                                                                                                                                                                                                                                                                                                                                                                                                                                                                                                                                                                                                                                                                                                                                                                                                                                                            | -1.42544 | -1.25558 |         |          |   |          |         |          |   |          |         |          |   |          |         |          |   |          |         |         |   |          |         |         |   |          |         |         |   |          |         |         |   |          |         |          |   |          |         |          |   |          |         |          |   |          |         |          |   |          |          |          |   |          |          |          |   |          |          |          |   |          |          |          |   |          |          |          |   |          |          |          |   |          |          |          |   |         |          |          |   |         |          |         |   |         |          |          |   |         |          |         |
| C                                                                                                                                                                                                          | 1.31119                                                                                                                                                                                                                                                                                                                                                                                                                                                                                                                                                                                                                                                                                                                                                                                                                                                                                                                                                                                                                                                                                                                                                                                                                                                                                                                                                                                                                                                                                                                                                                                                                                                                                                                                            | -2.47996 | 1.19687  |         |          |   |          |         |          |   |          |         |          |   |          |         |          |   |          |         |         |   |          |         |         |   |          |         |         |   |          |         |         |   |          |         |          |   |          |         |          |   |          |         |          |   |          |         |          |   |          |          |          |   |          |          |          |   |          |          |          |   |          |          |          |   |          |          |          |   |          |          |          |   |          |          |          |   |         |          |          |   |         |          |         |   |         |          |          |   |         |          |         |
| H                                                                                                                                                                                                          | 0.20127                                                                                                                                                                                                                                                                                                                                                                                                                                                                                                                                                                                                                                                                                                                                                                                                                                                                                                                                                                                                                                                                                                                                                                                                                                                                                                                                                                                                                                                                                                                                                                                                                                                                                                                                            | -0.87226 | 2.10464  |         |          |   |          |         |          |   |          |         |          |   |          |         |          |   |          |         |         |   |          |         |         |   |          |         |         |   |          |         |         |   |          |         |          |   |          |         |          |   |          |         |          |   |          |         |          |   |          |          |          |   |          |          |          |   |          |          |          |   |          |          |          |   |          |          |          |   |          |          |          |   |          |          |          |   |         |          |          |   |         |          |         |   |         |          |          |   |         |          |         |
| C                                                                                                                                                                                                          | 1.30688                                                                                                                                                                                                                                                                                                                                                                                                                                                                                                                                                                                                                                                                                                                                                                                                                                                                                                                                                                                                                                                                                                                                                                                                                                                                                                                                                                                                                                                                                                                                                                                                                                                                                                                                            | -2.54484 | -1.21198 |         |          |   |          |         |          |   |          |         |          |   |          |         |          |   |          |         |         |   |          |         |         |   |          |         |         |   |          |         |         |   |          |         |          |   |          |         |          |   |          |         |          |   |          |         |          |   |          |          |          |   |          |          |          |   |          |          |          |   |          |          |          |   |          |          |          |   |          |          |          |   |          |          |          |   |         |          |          |   |         |          |         |   |         |          |          |   |         |          |         |
| H                                                                                                                                                                                                          | 0.15830                                                                                                                                                                                                                                                                                                                                                                                                                                                                                                                                                                                                                                                                                                                                                                                                                                                                                                                                                                                                                                                                                                                                                                                                                                                                                                                                                                                                                                                                                                                                                                                                                                                                                                                                            | -0.99997 | -2.20454 |         |          |   |          |         |          |   |          |         |          |   |          |         |          |   |          |         |         |   |          |         |         |   |          |         |         |   |          |         |         |   |          |         |          |   |          |         |          |   |          |         |          |   |          |         |          |   |          |          |          |   |          |          |          |   |          |          |          |   |          |          |          |   |          |          |          |   |          |          |          |   |          |          |          |   |         |          |          |   |         |          |         |   |         |          |          |   |         |          |         |
| C                                                                                                                                                                                                          | 1.72507                                                                                                                                                                                                                                                                                                                                                                                                                                                                                                                                                                                                                                                                                                                                                                                                                                                                                                                                                                                                                                                                                                                                                                                                                                                                                                                                                                                                                                                                                                                                                                                                                                                                                                                                            | -3.08257 | 0.00738  |         |          |   |          |         |          |   |          |         |          |   |          |         |          |   |          |         |         |   |          |         |         |   |          |         |         |   |          |         |         |   |          |         |          |   |          |         |          |   |          |         |          |   |          |         |          |   |          |          |          |   |          |          |          |   |          |          |          |   |          |          |          |   |          |          |          |   |          |          |          |   |          |          |          |   |         |          |          |   |         |          |         |   |         |          |          |   |         |          |         |
| H                                                                                                                                                                                                          | 1.63868                                                                                                                                                                                                                                                                                                                                                                                                                                                                                                                                                                                                                                                                                                                                                                                                                                                                                                                                                                                                                                                                                                                                                                                                                                                                                                                                                                                                                                                                                                                                                                                                                                                                                                                                            | -2.87913 | 2.15822  |         |          |   |          |         |          |   |          |         |          |   |          |         |          |   |          |         |         |   |          |         |         |   |          |         |         |   |          |         |         |   |          |         |          |   |          |         |          |   |          |         |          |   |          |         |          |   |          |          |          |   |          |          |          |   |          |          |          |   |          |          |          |   |          |          |          |   |          |          |          |   |          |          |          |   |         |          |          |   |         |          |         |   |         |          |          |   |         |          |         |
| H                                                                                                                                                                                                          | 1.62569                                                                                                                                                                                                                                                                                                                                                                                                                                                                                                                                                                                                                                                                                                                                                                                                                                                                                                                                                                                                                                                                                                                                                                                                                                                                                                                                                                                                                                                                                                                                                                                                                                                                                                                                            | -3.00369 | -2.14938 |         |          |   |          |         |          |   |          |         |          |   |          |         |          |   |          |         |         |   |          |         |         |   |          |         |         |   |          |         |         |   |          |         |          |   |          |         |          |   |          |         |          |   |          |         |          |   |          |          |          |   |          |          |          |   |          |          |          |   |          |          |          |   |          |          |          |   |          |          |          |   |          |          |          |   |         |          |          |   |         |          |         |   |         |          |          |   |         |          |         |
| H                                                                                                                                                                                                          | 2.37232                                                                                                                                                                                                                                                                                                                                                                                                                                                                                                                                                                                                                                                                                                                                                                                                                                                                                                                                                                                                                                                                                                                                                                                                                                                                                                                                                                                                                                                                                                                                                                                                                                                                                                                                            | -3.96019 | 0.03087  |         |          |   |          |         |          |   |          |         |          |   |          |         |          |   |          |         |         |   |          |         |         |   |          |         |         |   |          |         |         |   |          |         |          |   |          |         |          |   |          |         |          |   |          |         |          |   |          |          |          |   |          |          |          |   |          |          |          |   |          |          |          |   |          |          |          |   |          |          |          |   |          |          |          |   |         |          |          |   |         |          |         |   |         |          |          |   |         |          |         |
| <b>IMINIUM CATIONS (C-PROTONATED IMIDAZOLES 1a-e), B3PW91/def2-TZVPD // PBE/def2-TZVPD</b>                                                                                                                 |                                                                                                                                                                                                                                                                                                                                                                                                                                                                                                                                                                                                                                                                                                                                                                                                                                                                                                                                                                                                                                                                                                                                                                                                                                                                                                                                                                                                                                                                                                                                                                                                                                                                                                                                                    |          |          |         |          |   |          |         |          |   |          |         |          |   |          |         |          |   |          |         |         |   |          |         |         |   |          |         |         |   |          |         |         |   |          |         |          |   |          |         |          |   |          |         |          |   |          |         |          |   |          |          |          |   |          |          |          |   |          |          |          |   |          |          |          |   |          |          |          |   |          |          |          |   |          |          |          |   |         |          |          |   |         |          |         |   |         |          |          |   |         |          |         |

|                                                                                                                                                       |                                                                                                                                                                                                                                                                                                                                                                                                                                                                                                                                                                                                                                                                                                                                                                                                                                                                                                                                                                                                                                                                        |          |          |         |          |   |         |         |          |   |          |         |          |   |          |         |         |   |          |         |          |   |          |         |          |   |          |         |          |   |          |          |          |   |          |          |          |   |          |          |          |   |          |          |          |   |          |         |          |   |          |         |         |   |          |          |          |
|-------------------------------------------------------------------------------------------------------------------------------------------------------|------------------------------------------------------------------------------------------------------------------------------------------------------------------------------------------------------------------------------------------------------------------------------------------------------------------------------------------------------------------------------------------------------------------------------------------------------------------------------------------------------------------------------------------------------------------------------------------------------------------------------------------------------------------------------------------------------------------------------------------------------------------------------------------------------------------------------------------------------------------------------------------------------------------------------------------------------------------------------------------------------------------------------------------------------------------------|----------|----------|---------|----------|---|---------|---------|----------|---|----------|---------|----------|---|----------|---------|---------|---|----------|---------|----------|---|----------|---------|----------|---|----------|---------|----------|---|----------|----------|----------|---|----------|----------|----------|---|----------|----------|----------|---|----------|----------|----------|---|----------|---------|----------|---|----------|---------|---------|---|----------|----------|----------|
| <p>Molecule: <b>1a_C</b></p> 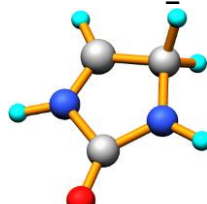 <p>Energy = -301.493367 Hartree</p>    | <p>11</p> <table border="1"> <tbody> <tr><td>C</td><td>-0.23819</td><td>1.66811</td><td>-0.02052</td></tr> <tr><td>O</td><td>0.85518</td><td>2.14145</td><td>-0.00686</td></tr> <tr><td>N</td><td>-1.51098</td><td>2.49577</td><td>-0.10575</td></tr> <tr><td>N</td><td>-0.74134</td><td>0.40367</td><td>0.02612</td></tr> <tr><td>C</td><td>-2.56611</td><td>1.76085</td><td>-0.10496</td></tr> <tr><td>C</td><td>-2.17817</td><td>0.33361</td><td>-0.01981</td></tr> <tr><td>H</td><td>-3.58486</td><td>2.15002</td><td>-0.15946</td></tr> <tr><td>H</td><td>-2.63218</td><td>-0.13155</td><td>0.87760</td></tr> <tr><td>H</td><td>-1.47238</td><td>3.51912</td><td>-0.15589</td></tr> <tr><td>H</td><td>-0.12874</td><td>-0.40536</td><td>0.08762</td></tr> <tr><td>H</td><td>-2.57123</td><td>-0.22067</td><td>-0.89509</td></tr> </tbody> </table>                                                                                                                                                                                                                | C        | -0.23819 | 1.66811 | -0.02052 | O | 0.85518 | 2.14145 | -0.00686 | N | -1.51098 | 2.49577 | -0.10575 | N | -0.74134 | 0.40367 | 0.02612 | C | -2.56611 | 1.76085 | -0.10496 | C | -2.17817 | 0.33361 | -0.01981 | H | -3.58486 | 2.15002 | -0.15946 | H | -2.63218 | -0.13155 | 0.87760  | H | -1.47238 | 3.51912  | -0.15589 | H | -0.12874 | -0.40536 | 0.08762  | H | -2.57123 | -0.22067 | -0.89509 |   |          |         |          |   |          |         |         |   |          |          |          |
| C                                                                                                                                                     | -0.23819                                                                                                                                                                                                                                                                                                                                                                                                                                                                                                                                                                                                                                                                                                                                                                                                                                                                                                                                                                                                                                                               | 1.66811  | -0.02052 |         |          |   |         |         |          |   |          |         |          |   |          |         |         |   |          |         |          |   |          |         |          |   |          |         |          |   |          |          |          |   |          |          |          |   |          |          |          |   |          |          |          |   |          |         |          |   |          |         |         |   |          |          |          |
| O                                                                                                                                                     | 0.85518                                                                                                                                                                                                                                                                                                                                                                                                                                                                                                                                                                                                                                                                                                                                                                                                                                                                                                                                                                                                                                                                | 2.14145  | -0.00686 |         |          |   |         |         |          |   |          |         |          |   |          |         |         |   |          |         |          |   |          |         |          |   |          |         |          |   |          |          |          |   |          |          |          |   |          |          |          |   |          |          |          |   |          |         |          |   |          |         |         |   |          |          |          |
| N                                                                                                                                                     | -1.51098                                                                                                                                                                                                                                                                                                                                                                                                                                                                                                                                                                                                                                                                                                                                                                                                                                                                                                                                                                                                                                                               | 2.49577  | -0.10575 |         |          |   |         |         |          |   |          |         |          |   |          |         |         |   |          |         |          |   |          |         |          |   |          |         |          |   |          |          |          |   |          |          |          |   |          |          |          |   |          |          |          |   |          |         |          |   |          |         |         |   |          |          |          |
| N                                                                                                                                                     | -0.74134                                                                                                                                                                                                                                                                                                                                                                                                                                                                                                                                                                                                                                                                                                                                                                                                                                                                                                                                                                                                                                                               | 0.40367  | 0.02612  |         |          |   |         |         |          |   |          |         |          |   |          |         |         |   |          |         |          |   |          |         |          |   |          |         |          |   |          |          |          |   |          |          |          |   |          |          |          |   |          |          |          |   |          |         |          |   |          |         |         |   |          |          |          |
| C                                                                                                                                                     | -2.56611                                                                                                                                                                                                                                                                                                                                                                                                                                                                                                                                                                                                                                                                                                                                                                                                                                                                                                                                                                                                                                                               | 1.76085  | -0.10496 |         |          |   |         |         |          |   |          |         |          |   |          |         |         |   |          |         |          |   |          |         |          |   |          |         |          |   |          |          |          |   |          |          |          |   |          |          |          |   |          |          |          |   |          |         |          |   |          |         |         |   |          |          |          |
| C                                                                                                                                                     | -2.17817                                                                                                                                                                                                                                                                                                                                                                                                                                                                                                                                                                                                                                                                                                                                                                                                                                                                                                                                                                                                                                                               | 0.33361  | -0.01981 |         |          |   |         |         |          |   |          |         |          |   |          |         |         |   |          |         |          |   |          |         |          |   |          |         |          |   |          |          |          |   |          |          |          |   |          |          |          |   |          |          |          |   |          |         |          |   |          |         |         |   |          |          |          |
| H                                                                                                                                                     | -3.58486                                                                                                                                                                                                                                                                                                                                                                                                                                                                                                                                                                                                                                                                                                                                                                                                                                                                                                                                                                                                                                                               | 2.15002  | -0.15946 |         |          |   |         |         |          |   |          |         |          |   |          |         |         |   |          |         |          |   |          |         |          |   |          |         |          |   |          |          |          |   |          |          |          |   |          |          |          |   |          |          |          |   |          |         |          |   |          |         |         |   |          |          |          |
| H                                                                                                                                                     | -2.63218                                                                                                                                                                                                                                                                                                                                                                                                                                                                                                                                                                                                                                                                                                                                                                                                                                                                                                                                                                                                                                                               | -0.13155 | 0.87760  |         |          |   |         |         |          |   |          |         |          |   |          |         |         |   |          |         |          |   |          |         |          |   |          |         |          |   |          |          |          |   |          |          |          |   |          |          |          |   |          |          |          |   |          |         |          |   |          |         |         |   |          |          |          |
| H                                                                                                                                                     | -1.47238                                                                                                                                                                                                                                                                                                                                                                                                                                                                                                                                                                                                                                                                                                                                                                                                                                                                                                                                                                                                                                                               | 3.51912  | -0.15589 |         |          |   |         |         |          |   |          |         |          |   |          |         |         |   |          |         |          |   |          |         |          |   |          |         |          |   |          |          |          |   |          |          |          |   |          |          |          |   |          |          |          |   |          |         |          |   |          |         |         |   |          |          |          |
| H                                                                                                                                                     | -0.12874                                                                                                                                                                                                                                                                                                                                                                                                                                                                                                                                                                                                                                                                                                                                                                                                                                                                                                                                                                                                                                                               | -0.40536 | 0.08762  |         |          |   |         |         |          |   |          |         |          |   |          |         |         |   |          |         |          |   |          |         |          |   |          |         |          |   |          |          |          |   |          |          |          |   |          |          |          |   |          |          |          |   |          |         |          |   |          |         |         |   |          |          |          |
| H                                                                                                                                                     | -2.57123                                                                                                                                                                                                                                                                                                                                                                                                                                                                                                                                                                                                                                                                                                                                                                                                                                                                                                                                                                                                                                                               | -0.22067 | -0.89509 |         |          |   |         |         |          |   |          |         |          |   |          |         |         |   |          |         |          |   |          |         |          |   |          |         |          |   |          |          |          |   |          |          |          |   |          |          |          |   |          |          |          |   |          |         |          |   |          |         |         |   |          |          |          |
| <p>Molecule: <b>1b_C1</b></p>  <p>Energy = -340.748250 Hartree</p>   | <p>14</p> <table border="1"> <tbody> <tr><td>C</td><td>-0.27257</td><td>1.67765</td><td>0.12331</td></tr> <tr><td>O</td><td>0.80752</td><td>2.16792</td><td>0.26454</td></tr> <tr><td>N</td><td>-1.53115</td><td>2.51045</td><td>-0.12136</td></tr> <tr><td>N</td><td>-0.75105</td><td>0.40886</td><td>0.11996</td></tr> <tr><td>C</td><td>-2.55847</td><td>1.74327</td><td>-0.24008</td></tr> <tr><td>C</td><td>-2.17127</td><td>0.31901</td><td>-0.09923</td></tr> <tr><td>H</td><td>-3.56987</td><td>2.11256</td><td>-0.42014</td></tr> <tr><td>H</td><td>-2.71812</td><td>-0.14849</td><td>0.74197</td></tr> <tr><td>H</td><td>-0.13805</td><td>-0.38961</td><td>0.25958</td></tr> <tr><td>C</td><td>-1.43453</td><td>3.96664</td><td>-0.18732</td></tr> <tr><td>H</td><td>-0.37641</td><td>4.22355</td><td>-0.05955</td></tr> <tr><td>H</td><td>-1.79579</td><td>4.31571</td><td>-1.16235</td></tr> <tr><td>H</td><td>-2.03198</td><td>4.41122</td><td>0.61820</td></tr> <tr><td>H</td><td>-2.44125</td><td>-0.24674</td><td>-1.01150</td></tr> </tbody> </table> | C        | -0.27257 | 1.67765 | 0.12331  | O | 0.80752 | 2.16792 | 0.26454  | N | -1.53115 | 2.51045 | -0.12136 | N | -0.75105 | 0.40886 | 0.11996 | C | -2.55847 | 1.74327 | -0.24008 | C | -2.17127 | 0.31901 | -0.09923 | H | -3.56987 | 2.11256 | -0.42014 | H | -2.71812 | -0.14849 | 0.74197  | H | -0.13805 | -0.38961 | 0.25958  | C | -1.43453 | 3.96664  | -0.18732 | H | -0.37641 | 4.22355  | -0.05955 | H | -1.79579 | 4.31571 | -1.16235 | H | -2.03198 | 4.41122 | 0.61820 | H | -2.44125 | -0.24674 | -1.01150 |
| C                                                                                                                                                     | -0.27257                                                                                                                                                                                                                                                                                                                                                                                                                                                                                                                                                                                                                                                                                                                                                                                                                                                                                                                                                                                                                                                               | 1.67765  | 0.12331  |         |          |   |         |         |          |   |          |         |          |   |          |         |         |   |          |         |          |   |          |         |          |   |          |         |          |   |          |          |          |   |          |          |          |   |          |          |          |   |          |          |          |   |          |         |          |   |          |         |         |   |          |          |          |
| O                                                                                                                                                     | 0.80752                                                                                                                                                                                                                                                                                                                                                                                                                                                                                                                                                                                                                                                                                                                                                                                                                                                                                                                                                                                                                                                                | 2.16792  | 0.26454  |         |          |   |         |         |          |   |          |         |          |   |          |         |         |   |          |         |          |   |          |         |          |   |          |         |          |   |          |          |          |   |          |          |          |   |          |          |          |   |          |          |          |   |          |         |          |   |          |         |         |   |          |          |          |
| N                                                                                                                                                     | -1.53115                                                                                                                                                                                                                                                                                                                                                                                                                                                                                                                                                                                                                                                                                                                                                                                                                                                                                                                                                                                                                                                               | 2.51045  | -0.12136 |         |          |   |         |         |          |   |          |         |          |   |          |         |         |   |          |         |          |   |          |         |          |   |          |         |          |   |          |          |          |   |          |          |          |   |          |          |          |   |          |          |          |   |          |         |          |   |          |         |         |   |          |          |          |
| N                                                                                                                                                     | -0.75105                                                                                                                                                                                                                                                                                                                                                                                                                                                                                                                                                                                                                                                                                                                                                                                                                                                                                                                                                                                                                                                               | 0.40886  | 0.11996  |         |          |   |         |         |          |   |          |         |          |   |          |         |         |   |          |         |          |   |          |         |          |   |          |         |          |   |          |          |          |   |          |          |          |   |          |          |          |   |          |          |          |   |          |         |          |   |          |         |         |   |          |          |          |
| C                                                                                                                                                     | -2.55847                                                                                                                                                                                                                                                                                                                                                                                                                                                                                                                                                                                                                                                                                                                                                                                                                                                                                                                                                                                                                                                               | 1.74327  | -0.24008 |         |          |   |         |         |          |   |          |         |          |   |          |         |         |   |          |         |          |   |          |         |          |   |          |         |          |   |          |          |          |   |          |          |          |   |          |          |          |   |          |          |          |   |          |         |          |   |          |         |         |   |          |          |          |
| C                                                                                                                                                     | -2.17127                                                                                                                                                                                                                                                                                                                                                                                                                                                                                                                                                                                                                                                                                                                                                                                                                                                                                                                                                                                                                                                               | 0.31901  | -0.09923 |         |          |   |         |         |          |   |          |         |          |   |          |         |         |   |          |         |          |   |          |         |          |   |          |         |          |   |          |          |          |   |          |          |          |   |          |          |          |   |          |          |          |   |          |         |          |   |          |         |         |   |          |          |          |
| H                                                                                                                                                     | -3.56987                                                                                                                                                                                                                                                                                                                                                                                                                                                                                                                                                                                                                                                                                                                                                                                                                                                                                                                                                                                                                                                               | 2.11256  | -0.42014 |         |          |   |         |         |          |   |          |         |          |   |          |         |         |   |          |         |          |   |          |         |          |   |          |         |          |   |          |          |          |   |          |          |          |   |          |          |          |   |          |          |          |   |          |         |          |   |          |         |         |   |          |          |          |
| H                                                                                                                                                     | -2.71812                                                                                                                                                                                                                                                                                                                                                                                                                                                                                                                                                                                                                                                                                                                                                                                                                                                                                                                                                                                                                                                               | -0.14849 | 0.74197  |         |          |   |         |         |          |   |          |         |          |   |          |         |         |   |          |         |          |   |          |         |          |   |          |         |          |   |          |          |          |   |          |          |          |   |          |          |          |   |          |          |          |   |          |         |          |   |          |         |         |   |          |          |          |
| H                                                                                                                                                     | -0.13805                                                                                                                                                                                                                                                                                                                                                                                                                                                                                                                                                                                                                                                                                                                                                                                                                                                                                                                                                                                                                                                               | -0.38961 | 0.25958  |         |          |   |         |         |          |   |          |         |          |   |          |         |         |   |          |         |          |   |          |         |          |   |          |         |          |   |          |          |          |   |          |          |          |   |          |          |          |   |          |          |          |   |          |         |          |   |          |         |         |   |          |          |          |
| C                                                                                                                                                     | -1.43453                                                                                                                                                                                                                                                                                                                                                                                                                                                                                                                                                                                                                                                                                                                                                                                                                                                                                                                                                                                                                                                               | 3.96664  | -0.18732 |         |          |   |         |         |          |   |          |         |          |   |          |         |         |   |          |         |          |   |          |         |          |   |          |         |          |   |          |          |          |   |          |          |          |   |          |          |          |   |          |          |          |   |          |         |          |   |          |         |         |   |          |          |          |
| H                                                                                                                                                     | -0.37641                                                                                                                                                                                                                                                                                                                                                                                                                                                                                                                                                                                                                                                                                                                                                                                                                                                                                                                                                                                                                                                               | 4.22355  | -0.05955 |         |          |   |         |         |          |   |          |         |          |   |          |         |         |   |          |         |          |   |          |         |          |   |          |         |          |   |          |          |          |   |          |          |          |   |          |          |          |   |          |          |          |   |          |         |          |   |          |         |         |   |          |          |          |
| H                                                                                                                                                     | -1.79579                                                                                                                                                                                                                                                                                                                                                                                                                                                                                                                                                                                                                                                                                                                                                                                                                                                                                                                                                                                                                                                               | 4.31571  | -1.16235 |         |          |   |         |         |          |   |          |         |          |   |          |         |         |   |          |         |          |   |          |         |          |   |          |         |          |   |          |          |          |   |          |          |          |   |          |          |          |   |          |          |          |   |          |         |          |   |          |         |         |   |          |          |          |
| H                                                                                                                                                     | -2.03198                                                                                                                                                                                                                                                                                                                                                                                                                                                                                                                                                                                                                                                                                                                                                                                                                                                                                                                                                                                                                                                               | 4.41122  | 0.61820  |         |          |   |         |         |          |   |          |         |          |   |          |         |         |   |          |         |          |   |          |         |          |   |          |         |          |   |          |          |          |   |          |          |          |   |          |          |          |   |          |          |          |   |          |         |          |   |          |         |         |   |          |          |          |
| H                                                                                                                                                     | -2.44125                                                                                                                                                                                                                                                                                                                                                                                                                                                                                                                                                                                                                                                                                                                                                                                                                                                                                                                                                                                                                                                               | -0.24674 | -1.01150 |         |          |   |         |         |          |   |          |         |          |   |          |         |         |   |          |         |          |   |          |         |          |   |          |         |          |   |          |          |          |   |          |          |          |   |          |          |          |   |          |          |          |   |          |         |          |   |          |         |         |   |          |          |          |
| <p>Molecule: <b>1b_C2</b></p>  <p>Energy = -340.740161 Hartree</p> | <p>14</p> <table border="1"> <tbody> <tr><td>C</td><td>-0.29896</td><td>1.78142</td><td>0.11022</td></tr> <tr><td>O</td><td>0.85458</td><td>2.05290</td><td>0.27475</td></tr> <tr><td>N</td><td>-1.42558</td><td>2.51317</td><td>-0.10591</td></tr> <tr><td>N</td><td>-0.82725</td><td>0.36294</td><td>0.10745</td></tr> <tr><td>C</td><td>-2.60814</td><td>1.70284</td><td>-0.24331</td></tr> <tr><td>C</td><td>-2.09791</td><td>0.32187</td><td>-0.08711</td></tr> <tr><td>H</td><td>-3.37949</td><td>1.91623</td><td>0.52380</td></tr> <tr><td>H</td><td>-2.68402</td><td>-0.59806</td><td>-0.12672</td></tr> <tr><td>H</td><td>-0.19861</td><td>-0.43412</td><td>0.24948</td></tr> <tr><td>C</td><td>-1.42024</td><td>3.97092</td><td>-0.18494</td></tr> <tr><td>H</td><td>-0.38625</td><td>4.30818</td><td>-0.05250</td></tr> <tr><td>H</td><td>-1.78849</td><td>4.29938</td><td>-1.16607</td></tr> <tr><td>H</td><td>-2.04755</td><td>4.39734</td><td>0.60941</td></tr> <tr><td>H</td><td>-3.10908</td><td>1.81798</td><td>-1.22557</td></tr> </tbody> </table>  | C        | -0.29896 | 1.78142 | 0.11022  | O | 0.85458 | 2.05290 | 0.27475  | N | -1.42558 | 2.51317 | -0.10591 | N | -0.82725 | 0.36294 | 0.10745 | C | -2.60814 | 1.70284 | -0.24331 | C | -2.09791 | 0.32187 | -0.08711 | H | -3.37949 | 1.91623 | 0.52380  | H | -2.68402 | -0.59806 | -0.12672 | H | -0.19861 | -0.43412 | 0.24948  | C | -1.42024 | 3.97092  | -0.18494 | H | -0.38625 | 4.30818  | -0.05250 | H | -1.78849 | 4.29938 | -1.16607 | H | -2.04755 | 4.39734 | 0.60941 | H | -3.10908 | 1.81798  | -1.22557 |
| C                                                                                                                                                     | -0.29896                                                                                                                                                                                                                                                                                                                                                                                                                                                                                                                                                                                                                                                                                                                                                                                                                                                                                                                                                                                                                                                               | 1.78142  | 0.11022  |         |          |   |         |         |          |   |          |         |          |   |          |         |         |   |          |         |          |   |          |         |          |   |          |         |          |   |          |          |          |   |          |          |          |   |          |          |          |   |          |          |          |   |          |         |          |   |          |         |         |   |          |          |          |
| O                                                                                                                                                     | 0.85458                                                                                                                                                                                                                                                                                                                                                                                                                                                                                                                                                                                                                                                                                                                                                                                                                                                                                                                                                                                                                                                                | 2.05290  | 0.27475  |         |          |   |         |         |          |   |          |         |          |   |          |         |         |   |          |         |          |   |          |         |          |   |          |         |          |   |          |          |          |   |          |          |          |   |          |          |          |   |          |          |          |   |          |         |          |   |          |         |         |   |          |          |          |
| N                                                                                                                                                     | -1.42558                                                                                                                                                                                                                                                                                                                                                                                                                                                                                                                                                                                                                                                                                                                                                                                                                                                                                                                                                                                                                                                               | 2.51317  | -0.10591 |         |          |   |         |         |          |   |          |         |          |   |          |         |         |   |          |         |          |   |          |         |          |   |          |         |          |   |          |          |          |   |          |          |          |   |          |          |          |   |          |          |          |   |          |         |          |   |          |         |         |   |          |          |          |
| N                                                                                                                                                     | -0.82725                                                                                                                                                                                                                                                                                                                                                                                                                                                                                                                                                                                                                                                                                                                                                                                                                                                                                                                                                                                                                                                               | 0.36294  | 0.10745  |         |          |   |         |         |          |   |          |         |          |   |          |         |         |   |          |         |          |   |          |         |          |   |          |         |          |   |          |          |          |   |          |          |          |   |          |          |          |   |          |          |          |   |          |         |          |   |          |         |         |   |          |          |          |
| C                                                                                                                                                     | -2.60814                                                                                                                                                                                                                                                                                                                                                                                                                                                                                                                                                                                                                                                                                                                                                                                                                                                                                                                                                                                                                                                               | 1.70284  | -0.24331 |         |          |   |         |         |          |   |          |         |          |   |          |         |         |   |          |         |          |   |          |         |          |   |          |         |          |   |          |          |          |   |          |          |          |   |          |          |          |   |          |          |          |   |          |         |          |   |          |         |         |   |          |          |          |
| C                                                                                                                                                     | -2.09791                                                                                                                                                                                                                                                                                                                                                                                                                                                                                                                                                                                                                                                                                                                                                                                                                                                                                                                                                                                                                                                               | 0.32187  | -0.08711 |         |          |   |         |         |          |   |          |         |          |   |          |         |         |   |          |         |          |   |          |         |          |   |          |         |          |   |          |          |          |   |          |          |          |   |          |          |          |   |          |          |          |   |          |         |          |   |          |         |         |   |          |          |          |
| H                                                                                                                                                     | -3.37949                                                                                                                                                                                                                                                                                                                                                                                                                                                                                                                                                                                                                                                                                                                                                                                                                                                                                                                                                                                                                                                               | 1.91623  | 0.52380  |         |          |   |         |         |          |   |          |         |          |   |          |         |         |   |          |         |          |   |          |         |          |   |          |         |          |   |          |          |          |   |          |          |          |   |          |          |          |   |          |          |          |   |          |         |          |   |          |         |         |   |          |          |          |
| H                                                                                                                                                     | -2.68402                                                                                                                                                                                                                                                                                                                                                                                                                                                                                                                                                                                                                                                                                                                                                                                                                                                                                                                                                                                                                                                               | -0.59806 | -0.12672 |         |          |   |         |         |          |   |          |         |          |   |          |         |         |   |          |         |          |   |          |         |          |   |          |         |          |   |          |          |          |   |          |          |          |   |          |          |          |   |          |          |          |   |          |         |          |   |          |         |         |   |          |          |          |
| H                                                                                                                                                     | -0.19861                                                                                                                                                                                                                                                                                                                                                                                                                                                                                                                                                                                                                                                                                                                                                                                                                                                                                                                                                                                                                                                               | -0.43412 | 0.24948  |         |          |   |         |         |          |   |          |         |          |   |          |         |         |   |          |         |          |   |          |         |          |   |          |         |          |   |          |          |          |   |          |          |          |   |          |          |          |   |          |          |          |   |          |         |          |   |          |         |         |   |          |          |          |
| C                                                                                                                                                     | -1.42024                                                                                                                                                                                                                                                                                                                                                                                                                                                                                                                                                                                                                                                                                                                                                                                                                                                                                                                                                                                                                                                               | 3.97092  | -0.18494 |         |          |   |         |         |          |   |          |         |          |   |          |         |         |   |          |         |          |   |          |         |          |   |          |         |          |   |          |          |          |   |          |          |          |   |          |          |          |   |          |          |          |   |          |         |          |   |          |         |         |   |          |          |          |
| H                                                                                                                                                     | -0.38625                                                                                                                                                                                                                                                                                                                                                                                                                                                                                                                                                                                                                                                                                                                                                                                                                                                                                                                                                                                                                                                               | 4.30818  | -0.05250 |         |          |   |         |         |          |   |          |         |          |   |          |         |         |   |          |         |          |   |          |         |          |   |          |         |          |   |          |          |          |   |          |          |          |   |          |          |          |   |          |          |          |   |          |         |          |   |          |         |         |   |          |          |          |
| H                                                                                                                                                     | -1.78849                                                                                                                                                                                                                                                                                                                                                                                                                                                                                                                                                                                                                                                                                                                                                                                                                                                                                                                                                                                                                                                               | 4.29938  | -1.16607 |         |          |   |         |         |          |   |          |         |          |   |          |         |         |   |          |         |          |   |          |         |          |   |          |         |          |   |          |          |          |   |          |          |          |   |          |          |          |   |          |          |          |   |          |         |          |   |          |         |         |   |          |          |          |
| H                                                                                                                                                     | -2.04755                                                                                                                                                                                                                                                                                                                                                                                                                                                                                                                                                                                                                                                                                                                                                                                                                                                                                                                                                                                                                                                               | 4.39734  | 0.60941  |         |          |   |         |         |          |   |          |         |          |   |          |         |         |   |          |         |          |   |          |         |          |   |          |         |          |   |          |          |          |   |          |          |          |   |          |          |          |   |          |          |          |   |          |         |          |   |          |         |         |   |          |          |          |
| H                                                                                                                                                     | -3.10908                                                                                                                                                                                                                                                                                                                                                                                                                                                                                                                                                                                                                                                                                                                                                                                                                                                                                                                                                                                                                                                               | 1.81798  | -1.22557 |         |          |   |         |         |          |   |          |         |          |   |          |         |         |   |          |         |          |   |          |         |          |   |          |         |          |   |          |          |          |   |          |          |          |   |          |          |          |   |          |          |          |   |          |         |          |   |          |         |         |   |          |          |          |

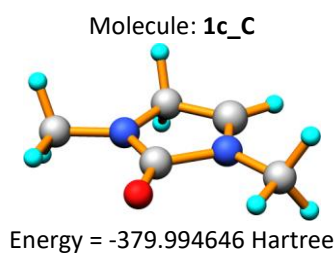

17

|   |          |          |          |
|---|----------|----------|----------|
| C | -0.27524 | 1.67292  | -0.00045 |
| O | 0.82110  | 2.15761  | 0.03776  |
| N | -1.53766 | 2.51525  | -0.13412 |
| N | -0.74467 | 0.40304  | 0.05106  |
| C | -2.57886 | 1.75793  | -0.15172 |
| C | -2.18094 | 0.33514  | -0.03592 |
| H | -3.59919 | 2.13493  | -0.24052 |
| H | -2.64764 | -0.12873 | 0.85487  |
| C | -1.43452 | 3.96979  | -0.22093 |
| H | -0.36738 | 4.21690  | -0.17523 |
| H | -1.86446 | 4.31264  | -1.16994 |
| H | -1.96698 | 4.42690  | 0.62210  |
| C | 0.12151  | -0.76391 | 0.17768  |
| H | 1.15730  | -0.40975 | 0.22268  |
| H | -0.11539 | -1.31580 | 1.09738  |
| H | -0.00069 | -1.42422 | -0.69156 |
| H | -2.53527 | -0.24065 | -0.91313 |

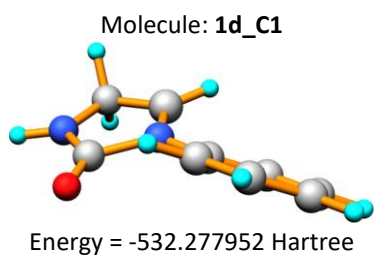

21

|   |          |          |          |
|---|----------|----------|----------|
| C | -0.77583 | 1.35793  | -1.09094 |
| O | -0.04214 | 1.34233  | -2.03303 |
| N | -1.71797 | 2.23011  | -0.65751 |
| N | -0.81481 | 0.25976  | -0.01013 |
| C | -2.35623 | 1.85669  | 0.57787  |
| C | -1.70127 | 0.56466  | 0.88726  |
| H | -3.45060 | 1.72604  | 0.48312  |
| H | -1.92702 | -0.07874 | 1.73700  |
| C | 0.06445  | -0.85755 | -0.02057 |
| C | 0.58293  | -1.31844 | 1.19915  |
| C | 0.37877  | -1.47711 | -1.23793 |
| C | 1.41663  | -2.43057 | 1.19668  |
| H | 0.37355  | -0.78596 | 2.12858  |
| C | 1.21082  | -2.59386 | -1.21664 |
| H | -0.02987 | -1.10511 | -2.17483 |
| C | 1.72762  | -3.07010 | -0.00889 |
| H | 1.84100  | -2.78844 | 2.13471  |
| H | 1.45590  | -3.09440 | -2.15331 |
| H | 2.38734  | -3.93826 | -0.00568 |
| H | -1.90704 | 3.08858  | -1.16688 |
| H | -2.18724 | 2.58945  | 1.38998  |

|                                                                                                                                                                                                               |                                                                                                                                                                                                                                                                                                                                                                                                                                                                                                                                                                                                                                                                                                                                                                                                                                                                                                                                                                                                                                                                                                                                                                                                                                                                                                                                                                                                                                                                                                                                                                                                                                                                                                                                                                                                                            |          |          |         |          |   |          |         |          |   |          |         |          |   |          |         |          |   |          |         |         |   |          |         |         |   |          |         |         |   |          |          |         |   |          |          |          |   |          |          |          |   |          |          |          |   |          |          |          |   |          |          |          |   |         |          |          |   |         |          |          |   |         |          |         |   |         |          |         |   |         |          |          |   |          |          |          |   |          |          |          |   |          |          |         |   |         |          |          |   |         |          |         |   |          |         |         |
|---------------------------------------------------------------------------------------------------------------------------------------------------------------------------------------------------------------|----------------------------------------------------------------------------------------------------------------------------------------------------------------------------------------------------------------------------------------------------------------------------------------------------------------------------------------------------------------------------------------------------------------------------------------------------------------------------------------------------------------------------------------------------------------------------------------------------------------------------------------------------------------------------------------------------------------------------------------------------------------------------------------------------------------------------------------------------------------------------------------------------------------------------------------------------------------------------------------------------------------------------------------------------------------------------------------------------------------------------------------------------------------------------------------------------------------------------------------------------------------------------------------------------------------------------------------------------------------------------------------------------------------------------------------------------------------------------------------------------------------------------------------------------------------------------------------------------------------------------------------------------------------------------------------------------------------------------------------------------------------------------------------------------------------------------|----------|----------|---------|----------|---|----------|---------|----------|---|----------|---------|----------|---|----------|---------|----------|---|----------|---------|---------|---|----------|---------|---------|---|----------|---------|---------|---|----------|----------|---------|---|----------|----------|----------|---|----------|----------|----------|---|----------|----------|----------|---|----------|----------|----------|---|----------|----------|----------|---|---------|----------|----------|---|---------|----------|----------|---|---------|----------|---------|---|---------|----------|---------|---|---------|----------|----------|---|----------|----------|----------|---|----------|----------|----------|---|----------|----------|---------|---|---------|----------|----------|---|---------|----------|---------|---|----------|---------|---------|
| <p style="text-align: center;">Molecule: <b>1d_C2</b></p> 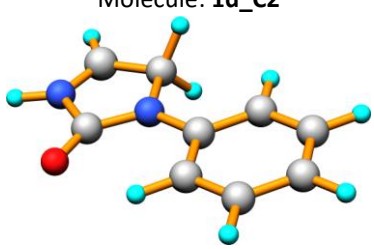 <p style="text-align: center;">Energy = -532.266538 Hartree</p>   | <p style="text-align: center;">21</p> <table border="0"> <tbody> <tr><td>C</td><td>-1.08446</td><td>1.05229</td><td>-1.21485</td></tr> <tr><td>O</td><td>-0.79066</td><td>1.00337</td><td>-2.37755</td></tr> <tr><td>N</td><td>-1.98810</td><td>2.10796</td><td>-0.66199</td></tr> <tr><td>N</td><td>-0.77434</td><td>0.30156</td><td>-0.10710</td></tr> <tr><td>C</td><td>-2.17834</td><td>1.98713</td><td>0.60669</td></tr> <tr><td>C</td><td>-1.41655</td><td>0.81516</td><td>1.08577</td></tr> <tr><td>H</td><td>-2.80318</td><td>2.65148</td><td>1.20430</td></tr> <tr><td>H</td><td>-2.09902</td><td>0.08292</td><td>1.55702</td></tr> <tr><td>C</td><td>0.07575</td><td>-0.84711</td><td>-0.08622</td></tr> <tr><td>C</td><td>0.28149</td><td>-1.51113</td><td>1.13135</td></tr> <tr><td>C</td><td>0.69428</td><td>-1.30218</td><td>-1.26070</td></tr> <tr><td>C</td><td>1.10816</td><td>-2.63167</td><td>1.17115</td></tr> <tr><td>H</td><td>-0.18979</td><td>-1.17434</td><td>2.05475</td></tr> <tr><td>C</td><td>1.51773</td><td>-2.42560</td><td>-1.19846</td></tr> <tr><td>H</td><td>0.53691</td><td>-0.79025</td><td>-2.20622</td></tr> <tr><td>C</td><td>1.72927</td><td>-3.09336</td><td>0.00808</td></tr> <tr><td>H</td><td>1.26535</td><td>-3.14486</td><td>2.11999</td></tr> <tr><td>H</td><td>1.99761</td><td>-2.77766</td><td>-2.11185</td></tr> <tr><td>H</td><td>2.37526</td><td>-3.97054</td><td>0.04476</td></tr> <tr><td>H</td><td>-2.38193</td><td>2.82361</td><td>-1.28081</td></tr> <tr><td>H</td><td>-0.69242</td><td>1.12226</td><td>1.86388</td></tr> </tbody> </table>                                                                                                                                                                                                                     | C        | -1.08446 | 1.05229 | -1.21485 | O | -0.79066 | 1.00337 | -2.37755 | N | -1.98810 | 2.10796 | -0.66199 | N | -0.77434 | 0.30156 | -0.10710 | C | -2.17834 | 1.98713 | 0.60669 | C | -1.41655 | 0.81516 | 1.08577 | H | -2.80318 | 2.65148 | 1.20430 | H | -2.09902 | 0.08292  | 1.55702 | C | 0.07575  | -0.84711 | -0.08622 | C | 0.28149  | -1.51113 | 1.13135  | C | 0.69428  | -1.30218 | -1.26070 | C | 1.10816  | -2.63167 | 1.17115  | H | -0.18979 | -1.17434 | 2.05475  | C | 1.51773 | -2.42560 | -1.19846 | H | 0.53691 | -0.79025 | -2.20622 | C | 1.72927 | -3.09336 | 0.00808 | H | 1.26535 | -3.14486 | 2.11999 | H | 1.99761 | -2.77766 | -2.11185 | H | 2.37526  | -3.97054 | 0.04476  | H | -2.38193 | 2.82361  | -1.28081 | H | -0.69242 | 1.12226  | 1.86388 |   |         |          |          |   |         |          |         |   |          |         |         |
| C                                                                                                                                                                                                             | -1.08446                                                                                                                                                                                                                                                                                                                                                                                                                                                                                                                                                                                                                                                                                                                                                                                                                                                                                                                                                                                                                                                                                                                                                                                                                                                                                                                                                                                                                                                                                                                                                                                                                                                                                                                                                                                                                   | 1.05229  | -1.21485 |         |          |   |          |         |          |   |          |         |          |   |          |         |          |   |          |         |         |   |          |         |         |   |          |         |         |   |          |          |         |   |          |          |          |   |          |          |          |   |          |          |          |   |          |          |          |   |          |          |          |   |         |          |          |   |         |          |          |   |         |          |         |   |         |          |         |   |         |          |          |   |          |          |          |   |          |          |          |   |          |          |         |   |         |          |          |   |         |          |         |   |          |         |         |
| O                                                                                                                                                                                                             | -0.79066                                                                                                                                                                                                                                                                                                                                                                                                                                                                                                                                                                                                                                                                                                                                                                                                                                                                                                                                                                                                                                                                                                                                                                                                                                                                                                                                                                                                                                                                                                                                                                                                                                                                                                                                                                                                                   | 1.00337  | -2.37755 |         |          |   |          |         |          |   |          |         |          |   |          |         |          |   |          |         |         |   |          |         |         |   |          |         |         |   |          |          |         |   |          |          |          |   |          |          |          |   |          |          |          |   |          |          |          |   |          |          |          |   |         |          |          |   |         |          |          |   |         |          |         |   |         |          |         |   |         |          |          |   |          |          |          |   |          |          |          |   |          |          |         |   |         |          |          |   |         |          |         |   |          |         |         |
| N                                                                                                                                                                                                             | -1.98810                                                                                                                                                                                                                                                                                                                                                                                                                                                                                                                                                                                                                                                                                                                                                                                                                                                                                                                                                                                                                                                                                                                                                                                                                                                                                                                                                                                                                                                                                                                                                                                                                                                                                                                                                                                                                   | 2.10796  | -0.66199 |         |          |   |          |         |          |   |          |         |          |   |          |         |          |   |          |         |         |   |          |         |         |   |          |         |         |   |          |          |         |   |          |          |          |   |          |          |          |   |          |          |          |   |          |          |          |   |          |          |          |   |         |          |          |   |         |          |          |   |         |          |         |   |         |          |         |   |         |          |          |   |          |          |          |   |          |          |          |   |          |          |         |   |         |          |          |   |         |          |         |   |          |         |         |
| N                                                                                                                                                                                                             | -0.77434                                                                                                                                                                                                                                                                                                                                                                                                                                                                                                                                                                                                                                                                                                                                                                                                                                                                                                                                                                                                                                                                                                                                                                                                                                                                                                                                                                                                                                                                                                                                                                                                                                                                                                                                                                                                                   | 0.30156  | -0.10710 |         |          |   |          |         |          |   |          |         |          |   |          |         |          |   |          |         |         |   |          |         |         |   |          |         |         |   |          |          |         |   |          |          |          |   |          |          |          |   |          |          |          |   |          |          |          |   |          |          |          |   |         |          |          |   |         |          |          |   |         |          |         |   |         |          |         |   |         |          |          |   |          |          |          |   |          |          |          |   |          |          |         |   |         |          |          |   |         |          |         |   |          |         |         |
| C                                                                                                                                                                                                             | -2.17834                                                                                                                                                                                                                                                                                                                                                                                                                                                                                                                                                                                                                                                                                                                                                                                                                                                                                                                                                                                                                                                                                                                                                                                                                                                                                                                                                                                                                                                                                                                                                                                                                                                                                                                                                                                                                   | 1.98713  | 0.60669  |         |          |   |          |         |          |   |          |         |          |   |          |         |          |   |          |         |         |   |          |         |         |   |          |         |         |   |          |          |         |   |          |          |          |   |          |          |          |   |          |          |          |   |          |          |          |   |          |          |          |   |         |          |          |   |         |          |          |   |         |          |         |   |         |          |         |   |         |          |          |   |          |          |          |   |          |          |          |   |          |          |         |   |         |          |          |   |         |          |         |   |          |         |         |
| C                                                                                                                                                                                                             | -1.41655                                                                                                                                                                                                                                                                                                                                                                                                                                                                                                                                                                                                                                                                                                                                                                                                                                                                                                                                                                                                                                                                                                                                                                                                                                                                                                                                                                                                                                                                                                                                                                                                                                                                                                                                                                                                                   | 0.81516  | 1.08577  |         |          |   |          |         |          |   |          |         |          |   |          |         |          |   |          |         |         |   |          |         |         |   |          |         |         |   |          |          |         |   |          |          |          |   |          |          |          |   |          |          |          |   |          |          |          |   |          |          |          |   |         |          |          |   |         |          |          |   |         |          |         |   |         |          |         |   |         |          |          |   |          |          |          |   |          |          |          |   |          |          |         |   |         |          |          |   |         |          |         |   |          |         |         |
| H                                                                                                                                                                                                             | -2.80318                                                                                                                                                                                                                                                                                                                                                                                                                                                                                                                                                                                                                                                                                                                                                                                                                                                                                                                                                                                                                                                                                                                                                                                                                                                                                                                                                                                                                                                                                                                                                                                                                                                                                                                                                                                                                   | 2.65148  | 1.20430  |         |          |   |          |         |          |   |          |         |          |   |          |         |          |   |          |         |         |   |          |         |         |   |          |         |         |   |          |          |         |   |          |          |          |   |          |          |          |   |          |          |          |   |          |          |          |   |          |          |          |   |         |          |          |   |         |          |          |   |         |          |         |   |         |          |         |   |         |          |          |   |          |          |          |   |          |          |          |   |          |          |         |   |         |          |          |   |         |          |         |   |          |         |         |
| H                                                                                                                                                                                                             | -2.09902                                                                                                                                                                                                                                                                                                                                                                                                                                                                                                                                                                                                                                                                                                                                                                                                                                                                                                                                                                                                                                                                                                                                                                                                                                                                                                                                                                                                                                                                                                                                                                                                                                                                                                                                                                                                                   | 0.08292  | 1.55702  |         |          |   |          |         |          |   |          |         |          |   |          |         |          |   |          |         |         |   |          |         |         |   |          |         |         |   |          |          |         |   |          |          |          |   |          |          |          |   |          |          |          |   |          |          |          |   |          |          |          |   |         |          |          |   |         |          |          |   |         |          |         |   |         |          |         |   |         |          |          |   |          |          |          |   |          |          |          |   |          |          |         |   |         |          |          |   |         |          |         |   |          |         |         |
| C                                                                                                                                                                                                             | 0.07575                                                                                                                                                                                                                                                                                                                                                                                                                                                                                                                                                                                                                                                                                                                                                                                                                                                                                                                                                                                                                                                                                                                                                                                                                                                                                                                                                                                                                                                                                                                                                                                                                                                                                                                                                                                                                    | -0.84711 | -0.08622 |         |          |   |          |         |          |   |          |         |          |   |          |         |          |   |          |         |         |   |          |         |         |   |          |         |         |   |          |          |         |   |          |          |          |   |          |          |          |   |          |          |          |   |          |          |          |   |          |          |          |   |         |          |          |   |         |          |          |   |         |          |         |   |         |          |         |   |         |          |          |   |          |          |          |   |          |          |          |   |          |          |         |   |         |          |          |   |         |          |         |   |          |         |         |
| C                                                                                                                                                                                                             | 0.28149                                                                                                                                                                                                                                                                                                                                                                                                                                                                                                                                                                                                                                                                                                                                                                                                                                                                                                                                                                                                                                                                                                                                                                                                                                                                                                                                                                                                                                                                                                                                                                                                                                                                                                                                                                                                                    | -1.51113 | 1.13135  |         |          |   |          |         |          |   |          |         |          |   |          |         |          |   |          |         |         |   |          |         |         |   |          |         |         |   |          |          |         |   |          |          |          |   |          |          |          |   |          |          |          |   |          |          |          |   |          |          |          |   |         |          |          |   |         |          |          |   |         |          |         |   |         |          |         |   |         |          |          |   |          |          |          |   |          |          |          |   |          |          |         |   |         |          |          |   |         |          |         |   |          |         |         |
| C                                                                                                                                                                                                             | 0.69428                                                                                                                                                                                                                                                                                                                                                                                                                                                                                                                                                                                                                                                                                                                                                                                                                                                                                                                                                                                                                                                                                                                                                                                                                                                                                                                                                                                                                                                                                                                                                                                                                                                                                                                                                                                                                    | -1.30218 | -1.26070 |         |          |   |          |         |          |   |          |         |          |   |          |         |          |   |          |         |         |   |          |         |         |   |          |         |         |   |          |          |         |   |          |          |          |   |          |          |          |   |          |          |          |   |          |          |          |   |          |          |          |   |         |          |          |   |         |          |          |   |         |          |         |   |         |          |         |   |         |          |          |   |          |          |          |   |          |          |          |   |          |          |         |   |         |          |          |   |         |          |         |   |          |         |         |
| C                                                                                                                                                                                                             | 1.10816                                                                                                                                                                                                                                                                                                                                                                                                                                                                                                                                                                                                                                                                                                                                                                                                                                                                                                                                                                                                                                                                                                                                                                                                                                                                                                                                                                                                                                                                                                                                                                                                                                                                                                                                                                                                                    | -2.63167 | 1.17115  |         |          |   |          |         |          |   |          |         |          |   |          |         |          |   |          |         |         |   |          |         |         |   |          |         |         |   |          |          |         |   |          |          |          |   |          |          |          |   |          |          |          |   |          |          |          |   |          |          |          |   |         |          |          |   |         |          |          |   |         |          |         |   |         |          |         |   |         |          |          |   |          |          |          |   |          |          |          |   |          |          |         |   |         |          |          |   |         |          |         |   |          |         |         |
| H                                                                                                                                                                                                             | -0.18979                                                                                                                                                                                                                                                                                                                                                                                                                                                                                                                                                                                                                                                                                                                                                                                                                                                                                                                                                                                                                                                                                                                                                                                                                                                                                                                                                                                                                                                                                                                                                                                                                                                                                                                                                                                                                   | -1.17434 | 2.05475  |         |          |   |          |         |          |   |          |         |          |   |          |         |          |   |          |         |         |   |          |         |         |   |          |         |         |   |          |          |         |   |          |          |          |   |          |          |          |   |          |          |          |   |          |          |          |   |          |          |          |   |         |          |          |   |         |          |          |   |         |          |         |   |         |          |         |   |         |          |          |   |          |          |          |   |          |          |          |   |          |          |         |   |         |          |          |   |         |          |         |   |          |         |         |
| C                                                                                                                                                                                                             | 1.51773                                                                                                                                                                                                                                                                                                                                                                                                                                                                                                                                                                                                                                                                                                                                                                                                                                                                                                                                                                                                                                                                                                                                                                                                                                                                                                                                                                                                                                                                                                                                                                                                                                                                                                                                                                                                                    | -2.42560 | -1.19846 |         |          |   |          |         |          |   |          |         |          |   |          |         |          |   |          |         |         |   |          |         |         |   |          |         |         |   |          |          |         |   |          |          |          |   |          |          |          |   |          |          |          |   |          |          |          |   |          |          |          |   |         |          |          |   |         |          |          |   |         |          |         |   |         |          |         |   |         |          |          |   |          |          |          |   |          |          |          |   |          |          |         |   |         |          |          |   |         |          |         |   |          |         |         |
| H                                                                                                                                                                                                             | 0.53691                                                                                                                                                                                                                                                                                                                                                                                                                                                                                                                                                                                                                                                                                                                                                                                                                                                                                                                                                                                                                                                                                                                                                                                                                                                                                                                                                                                                                                                                                                                                                                                                                                                                                                                                                                                                                    | -0.79025 | -2.20622 |         |          |   |          |         |          |   |          |         |          |   |          |         |          |   |          |         |         |   |          |         |         |   |          |         |         |   |          |          |         |   |          |          |          |   |          |          |          |   |          |          |          |   |          |          |          |   |          |          |          |   |         |          |          |   |         |          |          |   |         |          |         |   |         |          |         |   |         |          |          |   |          |          |          |   |          |          |          |   |          |          |         |   |         |          |          |   |         |          |         |   |          |         |         |
| C                                                                                                                                                                                                             | 1.72927                                                                                                                                                                                                                                                                                                                                                                                                                                                                                                                                                                                                                                                                                                                                                                                                                                                                                                                                                                                                                                                                                                                                                                                                                                                                                                                                                                                                                                                                                                                                                                                                                                                                                                                                                                                                                    | -3.09336 | 0.00808  |         |          |   |          |         |          |   |          |         |          |   |          |         |          |   |          |         |         |   |          |         |         |   |          |         |         |   |          |          |         |   |          |          |          |   |          |          |          |   |          |          |          |   |          |          |          |   |          |          |          |   |         |          |          |   |         |          |          |   |         |          |         |   |         |          |         |   |         |          |          |   |          |          |          |   |          |          |          |   |          |          |         |   |         |          |          |   |         |          |         |   |          |         |         |
| H                                                                                                                                                                                                             | 1.26535                                                                                                                                                                                                                                                                                                                                                                                                                                                                                                                                                                                                                                                                                                                                                                                                                                                                                                                                                                                                                                                                                                                                                                                                                                                                                                                                                                                                                                                                                                                                                                                                                                                                                                                                                                                                                    | -3.14486 | 2.11999  |         |          |   |          |         |          |   |          |         |          |   |          |         |          |   |          |         |         |   |          |         |         |   |          |         |         |   |          |          |         |   |          |          |          |   |          |          |          |   |          |          |          |   |          |          |          |   |          |          |          |   |         |          |          |   |         |          |          |   |         |          |         |   |         |          |         |   |         |          |          |   |          |          |          |   |          |          |          |   |          |          |         |   |         |          |          |   |         |          |         |   |          |         |         |
| H                                                                                                                                                                                                             | 1.99761                                                                                                                                                                                                                                                                                                                                                                                                                                                                                                                                                                                                                                                                                                                                                                                                                                                                                                                                                                                                                                                                                                                                                                                                                                                                                                                                                                                                                                                                                                                                                                                                                                                                                                                                                                                                                    | -2.77766 | -2.11185 |         |          |   |          |         |          |   |          |         |          |   |          |         |          |   |          |         |         |   |          |         |         |   |          |         |         |   |          |          |         |   |          |          |          |   |          |          |          |   |          |          |          |   |          |          |          |   |          |          |          |   |         |          |          |   |         |          |          |   |         |          |         |   |         |          |         |   |         |          |          |   |          |          |          |   |          |          |          |   |          |          |         |   |         |          |          |   |         |          |         |   |          |         |         |
| H                                                                                                                                                                                                             | 2.37526                                                                                                                                                                                                                                                                                                                                                                                                                                                                                                                                                                                                                                                                                                                                                                                                                                                                                                                                                                                                                                                                                                                                                                                                                                                                                                                                                                                                                                                                                                                                                                                                                                                                                                                                                                                                                    | -3.97054 | 0.04476  |         |          |   |          |         |          |   |          |         |          |   |          |         |          |   |          |         |         |   |          |         |         |   |          |         |         |   |          |          |         |   |          |          |          |   |          |          |          |   |          |          |          |   |          |          |          |   |          |          |          |   |         |          |          |   |         |          |          |   |         |          |         |   |         |          |         |   |         |          |          |   |          |          |          |   |          |          |          |   |          |          |         |   |         |          |          |   |         |          |         |   |          |         |         |
| H                                                                                                                                                                                                             | -2.38193                                                                                                                                                                                                                                                                                                                                                                                                                                                                                                                                                                                                                                                                                                                                                                                                                                                                                                                                                                                                                                                                                                                                                                                                                                                                                                                                                                                                                                                                                                                                                                                                                                                                                                                                                                                                                   | 2.82361  | -1.28081 |         |          |   |          |         |          |   |          |         |          |   |          |         |          |   |          |         |         |   |          |         |         |   |          |         |         |   |          |          |         |   |          |          |          |   |          |          |          |   |          |          |          |   |          |          |          |   |          |          |          |   |         |          |          |   |         |          |          |   |         |          |         |   |         |          |         |   |         |          |          |   |          |          |          |   |          |          |          |   |          |          |         |   |         |          |          |   |         |          |         |   |          |         |         |
| H                                                                                                                                                                                                             | -0.69242                                                                                                                                                                                                                                                                                                                                                                                                                                                                                                                                                                                                                                                                                                                                                                                                                                                                                                                                                                                                                                                                                                                                                                                                                                                                                                                                                                                                                                                                                                                                                                                                                                                                                                                                                                                                                   | 1.12226  | 1.86388  |         |          |   |          |         |          |   |          |         |          |   |          |         |          |   |          |         |         |   |          |         |         |   |          |         |         |   |          |          |         |   |          |          |          |   |          |          |          |   |          |          |          |   |          |          |          |   |          |          |          |   |         |          |          |   |         |          |          |   |         |          |         |   |         |          |         |   |         |          |          |   |          |          |          |   |          |          |          |   |          |          |         |   |         |          |          |   |         |          |         |   |          |         |         |
| <p style="text-align: center;">Molecule: <b>1e_C1</b></p>  <p style="text-align: center;">Energy = -571.523822 Hartree</p> | <p style="text-align: center;">24</p> <table border="0"> <tbody> <tr><td>C</td><td>-0.82790</td><td>1.31994</td><td>-1.10895</td></tr> <tr><td>O</td><td>-0.10822</td><td>1.29339</td><td>-2.06713</td></tr> <tr><td>N</td><td>-1.76678</td><td>2.20029</td><td>-0.68719</td></tr> <tr><td>N</td><td>-0.83262</td><td>0.24205</td><td>-0.01417</td></tr> <tr><td>C</td><td>-2.37629</td><td>1.82852</td><td>0.56414</td></tr> <tr><td>C</td><td>-1.70727</td><td>0.55024</td><td>0.89286</td></tr> <tr><td>H</td><td>-3.47182</td><td>1.69004</td><td>0.48575</td></tr> <tr><td>H</td><td>-1.91152</td><td>-0.08135</td><td>1.75658</td></tr> <tr><td>C</td><td>-2.09053</td><td>3.41974</td><td>-1.41693</td></tr> <tr><td>H</td><td>-1.87803</td><td>4.30200</td><td>-0.79763</td></tr> <tr><td>H</td><td>-1.46675</td><td>3.44901</td><td>-2.31700</td></tr> <tr><td>H</td><td>-3.15015</td><td>3.41980</td><td>-1.70661</td></tr> <tr><td>C</td><td>0.05810</td><td>-0.86652</td><td>-0.02196</td></tr> <tr><td>C</td><td>0.60086</td><td>-1.30377</td><td>1.19564</td></tr> <tr><td>C</td><td>0.35941</td><td>-1.50143</td><td>-1.23439</td></tr> <tr><td>C</td><td>1.44545</td><td>-2.40788</td><td>1.19668</td></tr> <tr><td>H</td><td>0.40072</td><td>-0.75958</td><td>2.12028</td></tr> <tr><td>C</td><td>1.20295</td><td>-2.60959</td><td>-1.20985</td></tr> <tr><td>H</td><td>-0.06667</td><td>-1.14540</td><td>-2.16965</td></tr> <tr><td>C</td><td>1.74362</td><td>-3.06268</td><td>-0.00376</td></tr> <tr><td>H</td><td>1.88801</td><td>-2.74736</td><td>2.13315</td></tr> <tr><td>H</td><td>1.43844</td><td>-3.12147</td><td>-2.14286</td></tr> <tr><td>H</td><td>2.41182</td><td>-3.92432</td><td>0.00190</td></tr> <tr><td>H</td><td>-2.20786</td><td>2.58234</td><td>1.35811</td></tr> </tbody> </table> | C        | -0.82790 | 1.31994 | -1.10895 | O | -0.10822 | 1.29339 | -2.06713 | N | -1.76678 | 2.20029 | -0.68719 | N | -0.83262 | 0.24205 | -0.01417 | C | -2.37629 | 1.82852 | 0.56414 | C | -1.70727 | 0.55024 | 0.89286 | H | -3.47182 | 1.69004 | 0.48575 | H | -1.91152 | -0.08135 | 1.75658 | C | -2.09053 | 3.41974  | -1.41693 | H | -1.87803 | 4.30200  | -0.79763 | H | -1.46675 | 3.44901  | -2.31700 | H | -3.15015 | 3.41980  | -1.70661 | C | 0.05810  | -0.86652 | -0.02196 | C | 0.60086 | -1.30377 | 1.19564  | C | 0.35941 | -1.50143 | -1.23439 | C | 1.44545 | -2.40788 | 1.19668 | H | 0.40072 | -0.75958 | 2.12028 | C | 1.20295 | -2.60959 | -1.20985 | H | -0.06667 | -1.14540 | -2.16965 | C | 1.74362  | -3.06268 | -0.00376 | H | 1.88801  | -2.74736 | 2.13315 | H | 1.43844 | -3.12147 | -2.14286 | H | 2.41182 | -3.92432 | 0.00190 | H | -2.20786 | 2.58234 | 1.35811 |
| C                                                                                                                                                                                                             | -0.82790                                                                                                                                                                                                                                                                                                                                                                                                                                                                                                                                                                                                                                                                                                                                                                                                                                                                                                                                                                                                                                                                                                                                                                                                                                                                                                                                                                                                                                                                                                                                                                                                                                                                                                                                                                                                                   | 1.31994  | -1.10895 |         |          |   |          |         |          |   |          |         |          |   |          |         |          |   |          |         |         |   |          |         |         |   |          |         |         |   |          |          |         |   |          |          |          |   |          |          |          |   |          |          |          |   |          |          |          |   |          |          |          |   |         |          |          |   |         |          |          |   |         |          |         |   |         |          |         |   |         |          |          |   |          |          |          |   |          |          |          |   |          |          |         |   |         |          |          |   |         |          |         |   |          |         |         |
| O                                                                                                                                                                                                             | -0.10822                                                                                                                                                                                                                                                                                                                                                                                                                                                                                                                                                                                                                                                                                                                                                                                                                                                                                                                                                                                                                                                                                                                                                                                                                                                                                                                                                                                                                                                                                                                                                                                                                                                                                                                                                                                                                   | 1.29339  | -2.06713 |         |          |   |          |         |          |   |          |         |          |   |          |         |          |   |          |         |         |   |          |         |         |   |          |         |         |   |          |          |         |   |          |          |          |   |          |          |          |   |          |          |          |   |          |          |          |   |          |          |          |   |         |          |          |   |         |          |          |   |         |          |         |   |         |          |         |   |         |          |          |   |          |          |          |   |          |          |          |   |          |          |         |   |         |          |          |   |         |          |         |   |          |         |         |
| N                                                                                                                                                                                                             | -1.76678                                                                                                                                                                                                                                                                                                                                                                                                                                                                                                                                                                                                                                                                                                                                                                                                                                                                                                                                                                                                                                                                                                                                                                                                                                                                                                                                                                                                                                                                                                                                                                                                                                                                                                                                                                                                                   | 2.20029  | -0.68719 |         |          |   |          |         |          |   |          |         |          |   |          |         |          |   |          |         |         |   |          |         |         |   |          |         |         |   |          |          |         |   |          |          |          |   |          |          |          |   |          |          |          |   |          |          |          |   |          |          |          |   |         |          |          |   |         |          |          |   |         |          |         |   |         |          |         |   |         |          |          |   |          |          |          |   |          |          |          |   |          |          |         |   |         |          |          |   |         |          |         |   |          |         |         |
| N                                                                                                                                                                                                             | -0.83262                                                                                                                                                                                                                                                                                                                                                                                                                                                                                                                                                                                                                                                                                                                                                                                                                                                                                                                                                                                                                                                                                                                                                                                                                                                                                                                                                                                                                                                                                                                                                                                                                                                                                                                                                                                                                   | 0.24205  | -0.01417 |         |          |   |          |         |          |   |          |         |          |   |          |         |          |   |          |         |         |   |          |         |         |   |          |         |         |   |          |          |         |   |          |          |          |   |          |          |          |   |          |          |          |   |          |          |          |   |          |          |          |   |         |          |          |   |         |          |          |   |         |          |         |   |         |          |         |   |         |          |          |   |          |          |          |   |          |          |          |   |          |          |         |   |         |          |          |   |         |          |         |   |          |         |         |
| C                                                                                                                                                                                                             | -2.37629                                                                                                                                                                                                                                                                                                                                                                                                                                                                                                                                                                                                                                                                                                                                                                                                                                                                                                                                                                                                                                                                                                                                                                                                                                                                                                                                                                                                                                                                                                                                                                                                                                                                                                                                                                                                                   | 1.82852  | 0.56414  |         |          |   |          |         |          |   |          |         |          |   |          |         |          |   |          |         |         |   |          |         |         |   |          |         |         |   |          |          |         |   |          |          |          |   |          |          |          |   |          |          |          |   |          |          |          |   |          |          |          |   |         |          |          |   |         |          |          |   |         |          |         |   |         |          |         |   |         |          |          |   |          |          |          |   |          |          |          |   |          |          |         |   |         |          |          |   |         |          |         |   |          |         |         |
| C                                                                                                                                                                                                             | -1.70727                                                                                                                                                                                                                                                                                                                                                                                                                                                                                                                                                                                                                                                                                                                                                                                                                                                                                                                                                                                                                                                                                                                                                                                                                                                                                                                                                                                                                                                                                                                                                                                                                                                                                                                                                                                                                   | 0.55024  | 0.89286  |         |          |   |          |         |          |   |          |         |          |   |          |         |          |   |          |         |         |   |          |         |         |   |          |         |         |   |          |          |         |   |          |          |          |   |          |          |          |   |          |          |          |   |          |          |          |   |          |          |          |   |         |          |          |   |         |          |          |   |         |          |         |   |         |          |         |   |         |          |          |   |          |          |          |   |          |          |          |   |          |          |         |   |         |          |          |   |         |          |         |   |          |         |         |
| H                                                                                                                                                                                                             | -3.47182                                                                                                                                                                                                                                                                                                                                                                                                                                                                                                                                                                                                                                                                                                                                                                                                                                                                                                                                                                                                                                                                                                                                                                                                                                                                                                                                                                                                                                                                                                                                                                                                                                                                                                                                                                                                                   | 1.69004  | 0.48575  |         |          |   |          |         |          |   |          |         |          |   |          |         |          |   |          |         |         |   |          |         |         |   |          |         |         |   |          |          |         |   |          |          |          |   |          |          |          |   |          |          |          |   |          |          |          |   |          |          |          |   |         |          |          |   |         |          |          |   |         |          |         |   |         |          |         |   |         |          |          |   |          |          |          |   |          |          |          |   |          |          |         |   |         |          |          |   |         |          |         |   |          |         |         |
| H                                                                                                                                                                                                             | -1.91152                                                                                                                                                                                                                                                                                                                                                                                                                                                                                                                                                                                                                                                                                                                                                                                                                                                                                                                                                                                                                                                                                                                                                                                                                                                                                                                                                                                                                                                                                                                                                                                                                                                                                                                                                                                                                   | -0.08135 | 1.75658  |         |          |   |          |         |          |   |          |         |          |   |          |         |          |   |          |         |         |   |          |         |         |   |          |         |         |   |          |          |         |   |          |          |          |   |          |          |          |   |          |          |          |   |          |          |          |   |          |          |          |   |         |          |          |   |         |          |          |   |         |          |         |   |         |          |         |   |         |          |          |   |          |          |          |   |          |          |          |   |          |          |         |   |         |          |          |   |         |          |         |   |          |         |         |
| C                                                                                                                                                                                                             | -2.09053                                                                                                                                                                                                                                                                                                                                                                                                                                                                                                                                                                                                                                                                                                                                                                                                                                                                                                                                                                                                                                                                                                                                                                                                                                                                                                                                                                                                                                                                                                                                                                                                                                                                                                                                                                                                                   | 3.41974  | -1.41693 |         |          |   |          |         |          |   |          |         |          |   |          |         |          |   |          |         |         |   |          |         |         |   |          |         |         |   |          |          |         |   |          |          |          |   |          |          |          |   |          |          |          |   |          |          |          |   |          |          |          |   |         |          |          |   |         |          |          |   |         |          |         |   |         |          |         |   |         |          |          |   |          |          |          |   |          |          |          |   |          |          |         |   |         |          |          |   |         |          |         |   |          |         |         |
| H                                                                                                                                                                                                             | -1.87803                                                                                                                                                                                                                                                                                                                                                                                                                                                                                                                                                                                                                                                                                                                                                                                                                                                                                                                                                                                                                                                                                                                                                                                                                                                                                                                                                                                                                                                                                                                                                                                                                                                                                                                                                                                                                   | 4.30200  | -0.79763 |         |          |   |          |         |          |   |          |         |          |   |          |         |          |   |          |         |         |   |          |         |         |   |          |         |         |   |          |          |         |   |          |          |          |   |          |          |          |   |          |          |          |   |          |          |          |   |          |          |          |   |         |          |          |   |         |          |          |   |         |          |         |   |         |          |         |   |         |          |          |   |          |          |          |   |          |          |          |   |          |          |         |   |         |          |          |   |         |          |         |   |          |         |         |
| H                                                                                                                                                                                                             | -1.46675                                                                                                                                                                                                                                                                                                                                                                                                                                                                                                                                                                                                                                                                                                                                                                                                                                                                                                                                                                                                                                                                                                                                                                                                                                                                                                                                                                                                                                                                                                                                                                                                                                                                                                                                                                                                                   | 3.44901  | -2.31700 |         |          |   |          |         |          |   |          |         |          |   |          |         |          |   |          |         |         |   |          |         |         |   |          |         |         |   |          |          |         |   |          |          |          |   |          |          |          |   |          |          |          |   |          |          |          |   |          |          |          |   |         |          |          |   |         |          |          |   |         |          |         |   |         |          |         |   |         |          |          |   |          |          |          |   |          |          |          |   |          |          |         |   |         |          |          |   |         |          |         |   |          |         |         |
| H                                                                                                                                                                                                             | -3.15015                                                                                                                                                                                                                                                                                                                                                                                                                                                                                                                                                                                                                                                                                                                                                                                                                                                                                                                                                                                                                                                                                                                                                                                                                                                                                                                                                                                                                                                                                                                                                                                                                                                                                                                                                                                                                   | 3.41980  | -1.70661 |         |          |   |          |         |          |   |          |         |          |   |          |         |          |   |          |         |         |   |          |         |         |   |          |         |         |   |          |          |         |   |          |          |          |   |          |          |          |   |          |          |          |   |          |          |          |   |          |          |          |   |         |          |          |   |         |          |          |   |         |          |         |   |         |          |         |   |         |          |          |   |          |          |          |   |          |          |          |   |          |          |         |   |         |          |          |   |         |          |         |   |          |         |         |
| C                                                                                                                                                                                                             | 0.05810                                                                                                                                                                                                                                                                                                                                                                                                                                                                                                                                                                                                                                                                                                                                                                                                                                                                                                                                                                                                                                                                                                                                                                                                                                                                                                                                                                                                                                                                                                                                                                                                                                                                                                                                                                                                                    | -0.86652 | -0.02196 |         |          |   |          |         |          |   |          |         |          |   |          |         |          |   |          |         |         |   |          |         |         |   |          |         |         |   |          |          |         |   |          |          |          |   |          |          |          |   |          |          |          |   |          |          |          |   |          |          |          |   |         |          |          |   |         |          |          |   |         |          |         |   |         |          |         |   |         |          |          |   |          |          |          |   |          |          |          |   |          |          |         |   |         |          |          |   |         |          |         |   |          |         |         |
| C                                                                                                                                                                                                             | 0.60086                                                                                                                                                                                                                                                                                                                                                                                                                                                                                                                                                                                                                                                                                                                                                                                                                                                                                                                                                                                                                                                                                                                                                                                                                                                                                                                                                                                                                                                                                                                                                                                                                                                                                                                                                                                                                    | -1.30377 | 1.19564  |         |          |   |          |         |          |   |          |         |          |   |          |         |          |   |          |         |         |   |          |         |         |   |          |         |         |   |          |          |         |   |          |          |          |   |          |          |          |   |          |          |          |   |          |          |          |   |          |          |          |   |         |          |          |   |         |          |          |   |         |          |         |   |         |          |         |   |         |          |          |   |          |          |          |   |          |          |          |   |          |          |         |   |         |          |          |   |         |          |         |   |          |         |         |
| C                                                                                                                                                                                                             | 0.35941                                                                                                                                                                                                                                                                                                                                                                                                                                                                                                                                                                                                                                                                                                                                                                                                                                                                                                                                                                                                                                                                                                                                                                                                                                                                                                                                                                                                                                                                                                                                                                                                                                                                                                                                                                                                                    | -1.50143 | -1.23439 |         |          |   |          |         |          |   |          |         |          |   |          |         |          |   |          |         |         |   |          |         |         |   |          |         |         |   |          |          |         |   |          |          |          |   |          |          |          |   |          |          |          |   |          |          |          |   |          |          |          |   |         |          |          |   |         |          |          |   |         |          |         |   |         |          |         |   |         |          |          |   |          |          |          |   |          |          |          |   |          |          |         |   |         |          |          |   |         |          |         |   |          |         |         |
| C                                                                                                                                                                                                             | 1.44545                                                                                                                                                                                                                                                                                                                                                                                                                                                                                                                                                                                                                                                                                                                                                                                                                                                                                                                                                                                                                                                                                                                                                                                                                                                                                                                                                                                                                                                                                                                                                                                                                                                                                                                                                                                                                    | -2.40788 | 1.19668  |         |          |   |          |         |          |   |          |         |          |   |          |         |          |   |          |         |         |   |          |         |         |   |          |         |         |   |          |          |         |   |          |          |          |   |          |          |          |   |          |          |          |   |          |          |          |   |          |          |          |   |         |          |          |   |         |          |          |   |         |          |         |   |         |          |         |   |         |          |          |   |          |          |          |   |          |          |          |   |          |          |         |   |         |          |          |   |         |          |         |   |          |         |         |
| H                                                                                                                                                                                                             | 0.40072                                                                                                                                                                                                                                                                                                                                                                                                                                                                                                                                                                                                                                                                                                                                                                                                                                                                                                                                                                                                                                                                                                                                                                                                                                                                                                                                                                                                                                                                                                                                                                                                                                                                                                                                                                                                                    | -0.75958 | 2.12028  |         |          |   |          |         |          |   |          |         |          |   |          |         |          |   |          |         |         |   |          |         |         |   |          |         |         |   |          |          |         |   |          |          |          |   |          |          |          |   |          |          |          |   |          |          |          |   |          |          |          |   |         |          |          |   |         |          |          |   |         |          |         |   |         |          |         |   |         |          |          |   |          |          |          |   |          |          |          |   |          |          |         |   |         |          |          |   |         |          |         |   |          |         |         |
| C                                                                                                                                                                                                             | 1.20295                                                                                                                                                                                                                                                                                                                                                                                                                                                                                                                                                                                                                                                                                                                                                                                                                                                                                                                                                                                                                                                                                                                                                                                                                                                                                                                                                                                                                                                                                                                                                                                                                                                                                                                                                                                                                    | -2.60959 | -1.20985 |         |          |   |          |         |          |   |          |         |          |   |          |         |          |   |          |         |         |   |          |         |         |   |          |         |         |   |          |          |         |   |          |          |          |   |          |          |          |   |          |          |          |   |          |          |          |   |          |          |          |   |         |          |          |   |         |          |          |   |         |          |         |   |         |          |         |   |         |          |          |   |          |          |          |   |          |          |          |   |          |          |         |   |         |          |          |   |         |          |         |   |          |         |         |
| H                                                                                                                                                                                                             | -0.06667                                                                                                                                                                                                                                                                                                                                                                                                                                                                                                                                                                                                                                                                                                                                                                                                                                                                                                                                                                                                                                                                                                                                                                                                                                                                                                                                                                                                                                                                                                                                                                                                                                                                                                                                                                                                                   | -1.14540 | -2.16965 |         |          |   |          |         |          |   |          |         |          |   |          |         |          |   |          |         |         |   |          |         |         |   |          |         |         |   |          |          |         |   |          |          |          |   |          |          |          |   |          |          |          |   |          |          |          |   |          |          |          |   |         |          |          |   |         |          |          |   |         |          |         |   |         |          |         |   |         |          |          |   |          |          |          |   |          |          |          |   |          |          |         |   |         |          |          |   |         |          |         |   |          |         |         |
| C                                                                                                                                                                                                             | 1.74362                                                                                                                                                                                                                                                                                                                                                                                                                                                                                                                                                                                                                                                                                                                                                                                                                                                                                                                                                                                                                                                                                                                                                                                                                                                                                                                                                                                                                                                                                                                                                                                                                                                                                                                                                                                                                    | -3.06268 | -0.00376 |         |          |   |          |         |          |   |          |         |          |   |          |         |          |   |          |         |         |   |          |         |         |   |          |         |         |   |          |          |         |   |          |          |          |   |          |          |          |   |          |          |          |   |          |          |          |   |          |          |          |   |         |          |          |   |         |          |          |   |         |          |         |   |         |          |         |   |         |          |          |   |          |          |          |   |          |          |          |   |          |          |         |   |         |          |          |   |         |          |         |   |          |         |         |
| H                                                                                                                                                                                                             | 1.88801                                                                                                                                                                                                                                                                                                                                                                                                                                                                                                                                                                                                                                                                                                                                                                                                                                                                                                                                                                                                                                                                                                                                                                                                                                                                                                                                                                                                                                                                                                                                                                                                                                                                                                                                                                                                                    | -2.74736 | 2.13315  |         |          |   |          |         |          |   |          |         |          |   |          |         |          |   |          |         |         |   |          |         |         |   |          |         |         |   |          |          |         |   |          |          |          |   |          |          |          |   |          |          |          |   |          |          |          |   |          |          |          |   |         |          |          |   |         |          |          |   |         |          |         |   |         |          |         |   |         |          |          |   |          |          |          |   |          |          |          |   |          |          |         |   |         |          |          |   |         |          |         |   |          |         |         |
| H                                                                                                                                                                                                             | 1.43844                                                                                                                                                                                                                                                                                                                                                                                                                                                                                                                                                                                                                                                                                                                                                                                                                                                                                                                                                                                                                                                                                                                                                                                                                                                                                                                                                                                                                                                                                                                                                                                                                                                                                                                                                                                                                    | -3.12147 | -2.14286 |         |          |   |          |         |          |   |          |         |          |   |          |         |          |   |          |         |         |   |          |         |         |   |          |         |         |   |          |          |         |   |          |          |          |   |          |          |          |   |          |          |          |   |          |          |          |   |          |          |          |   |         |          |          |   |         |          |          |   |         |          |         |   |         |          |         |   |         |          |          |   |          |          |          |   |          |          |          |   |          |          |         |   |         |          |          |   |         |          |         |   |          |         |         |
| H                                                                                                                                                                                                             | 2.41182                                                                                                                                                                                                                                                                                                                                                                                                                                                                                                                                                                                                                                                                                                                                                                                                                                                                                                                                                                                                                                                                                                                                                                                                                                                                                                                                                                                                                                                                                                                                                                                                                                                                                                                                                                                                                    | -3.92432 | 0.00190  |         |          |   |          |         |          |   |          |         |          |   |          |         |          |   |          |         |         |   |          |         |         |   |          |         |         |   |          |          |         |   |          |          |          |   |          |          |          |   |          |          |          |   |          |          |          |   |          |          |          |   |         |          |          |   |         |          |          |   |         |          |         |   |         |          |         |   |         |          |          |   |          |          |          |   |          |          |          |   |          |          |         |   |         |          |          |   |         |          |         |   |          |         |         |
| H                                                                                                                                                                                                             | -2.20786                                                                                                                                                                                                                                                                                                                                                                                                                                                                                                                                                                                                                                                                                                                                                                                                                                                                                                                                                                                                                                                                                                                                                                                                                                                                                                                                                                                                                                                                                                                                                                                                                                                                                                                                                                                                                   | 2.58234  | 1.35811  |         |          |   |          |         |          |   |          |         |          |   |          |         |          |   |          |         |         |   |          |         |         |   |          |         |         |   |          |          |         |   |          |          |          |   |          |          |          |   |          |          |          |   |          |          |          |   |          |          |          |   |         |          |          |   |         |          |          |   |         |          |         |   |         |          |         |   |         |          |          |   |          |          |          |   |          |          |          |   |          |          |         |   |         |          |          |   |         |          |         |   |          |         |         |

|                                                                                                                                                                                                               |                                                                                                                                                                                                                                                                                                                                                                                                                                                                                                                                                                                                                                                                                                                                                                                                                                                                                                                                                                                                                                                                                                                                                                                                                                                                                                                                                                                                                                                                                                                                                                                                                                                                                                                                                                                                                           |          |          |         |          |   |          |         |          |   |          |         |          |   |          |         |          |   |          |         |          |   |          |         |          |   |          |         |          |   |          |          |         |   |          |         |          |   |          |          |          |   |          |         |          |   |          |         |          |   |         |          |          |   |         |          |         |   |         |          |          |   |         |          |         |   |          |          |         |   |         |          |          |   |         |          |          |   |         |          |          |   |         |          |         |   |         |          |          |   |         |          |         |   |          |         |         |
|---------------------------------------------------------------------------------------------------------------------------------------------------------------------------------------------------------------|---------------------------------------------------------------------------------------------------------------------------------------------------------------------------------------------------------------------------------------------------------------------------------------------------------------------------------------------------------------------------------------------------------------------------------------------------------------------------------------------------------------------------------------------------------------------------------------------------------------------------------------------------------------------------------------------------------------------------------------------------------------------------------------------------------------------------------------------------------------------------------------------------------------------------------------------------------------------------------------------------------------------------------------------------------------------------------------------------------------------------------------------------------------------------------------------------------------------------------------------------------------------------------------------------------------------------------------------------------------------------------------------------------------------------------------------------------------------------------------------------------------------------------------------------------------------------------------------------------------------------------------------------------------------------------------------------------------------------------------------------------------------------------------------------------------------------|----------|----------|---------|----------|---|----------|---------|----------|---|----------|---------|----------|---|----------|---------|----------|---|----------|---------|----------|---|----------|---------|----------|---|----------|---------|----------|---|----------|----------|---------|---|----------|---------|----------|---|----------|----------|----------|---|----------|---------|----------|---|----------|---------|----------|---|---------|----------|----------|---|---------|----------|---------|---|---------|----------|----------|---|---------|----------|---------|---|----------|----------|---------|---|---------|----------|----------|---|---------|----------|----------|---|---------|----------|----------|---|---------|----------|---------|---|---------|----------|----------|---|---------|----------|---------|---|----------|---------|---------|
| <p style="text-align: center;">Molecule: <b>1e_C2</b></p> 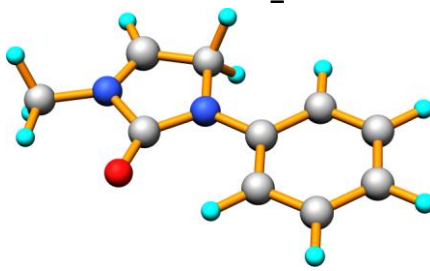 <p style="text-align: center;">Energy = -571.520468 Hartree</p>   | <p style="text-align: center;">24</p> <table border="0"> <tbody> <tr><td>C</td><td>-0.97105</td><td>1.13541</td><td>-1.16461</td></tr> <tr><td>O</td><td>-0.64347</td><td>1.11504</td><td>-2.32116</td></tr> <tr><td>N</td><td>-1.87211</td><td>2.21995</td><td>-0.61706</td></tr> <tr><td>N</td><td>-0.71354</td><td>0.34190</td><td>-0.08316</td></tr> <tr><td>C</td><td>-2.08766</td><td>2.04190</td><td>0.64070</td></tr> <tr><td>C</td><td>-1.37504</td><td>0.83373</td><td>1.10800</td></tr> <tr><td>H</td><td>-2.70964</td><td>2.69917</td><td>1.24955</td></tr> <tr><td>H</td><td>-2.08791</td><td>0.10301</td><td>1.53202</td></tr> <tr><td>C</td><td>-2.36214</td><td>3.26990</td><td>-1.50694</td></tr> <tr><td>H</td><td>-2.01467</td><td>4.24637</td><td>-1.14836</td></tr> <tr><td>H</td><td>-1.95154</td><td>3.06141</td><td>-2.50158</td></tr> <tr><td>H</td><td>-3.45825</td><td>3.24504</td><td>-1.53466</td></tr> <tr><td>C</td><td>0.10308</td><td>-0.83248</td><td>-0.07622</td></tr> <tr><td>C</td><td>0.23929</td><td>-1.54964</td><td>1.12041</td></tr> <tr><td>C</td><td>0.75731</td><td>-1.25942</td><td>-1.24093</td></tr> <tr><td>C</td><td>1.03206</td><td>-2.69529</td><td>1.14894</td></tr> <tr><td>H</td><td>-0.26120</td><td>-1.23488</td><td>2.03608</td></tr> <tr><td>C</td><td>1.54579</td><td>-2.40837</td><td>-1.19077</td></tr> <tr><td>H</td><td>0.65386</td><td>-0.70658</td><td>-2.17069</td></tr> <tr><td>C</td><td>1.68802</td><td>-3.12928</td><td>-0.00468</td></tr> <tr><td>H</td><td>1.13430</td><td>-3.24944</td><td>2.08216</td></tr> <tr><td>H</td><td>2.05363</td><td>-2.73824</td><td>-2.09735</td></tr> <tr><td>H</td><td>2.30710</td><td>-4.02600</td><td>0.02248</td></tr> <tr><td>H</td><td>-0.66121</td><td>1.09182</td><td>1.91185</td></tr> </tbody> </table> | C        | -0.97105 | 1.13541 | -1.16461 | O | -0.64347 | 1.11504 | -2.32116 | N | -1.87211 | 2.21995 | -0.61706 | N | -0.71354 | 0.34190 | -0.08316 | C | -2.08766 | 2.04190 | 0.64070  | C | -1.37504 | 0.83373 | 1.10800  | H | -2.70964 | 2.69917 | 1.24955  | H | -2.08791 | 0.10301  | 1.53202 | C | -2.36214 | 3.26990 | -1.50694 | H | -2.01467 | 4.24637  | -1.14836 | H | -1.95154 | 3.06141 | -2.50158 | H | -3.45825 | 3.24504 | -1.53466 | C | 0.10308 | -0.83248 | -0.07622 | C | 0.23929 | -1.54964 | 1.12041 | C | 0.75731 | -1.25942 | -1.24093 | C | 1.03206 | -2.69529 | 1.14894 | H | -0.26120 | -1.23488 | 2.03608 | C | 1.54579 | -2.40837 | -1.19077 | H | 0.65386 | -0.70658 | -2.17069 | C | 1.68802 | -3.12928 | -0.00468 | H | 1.13430 | -3.24944 | 2.08216 | H | 2.05363 | -2.73824 | -2.09735 | H | 2.30710 | -4.02600 | 0.02248 | H | -0.66121 | 1.09182 | 1.91185 |
| C                                                                                                                                                                                                             | -0.97105                                                                                                                                                                                                                                                                                                                                                                                                                                                                                                                                                                                                                                                                                                                                                                                                                                                                                                                                                                                                                                                                                                                                                                                                                                                                                                                                                                                                                                                                                                                                                                                                                                                                                                                                                                                                                  | 1.13541  | -1.16461 |         |          |   |          |         |          |   |          |         |          |   |          |         |          |   |          |         |          |   |          |         |          |   |          |         |          |   |          |          |         |   |          |         |          |   |          |          |          |   |          |         |          |   |          |         |          |   |         |          |          |   |         |          |         |   |         |          |          |   |         |          |         |   |          |          |         |   |         |          |          |   |         |          |          |   |         |          |          |   |         |          |         |   |         |          |          |   |         |          |         |   |          |         |         |
| O                                                                                                                                                                                                             | -0.64347                                                                                                                                                                                                                                                                                                                                                                                                                                                                                                                                                                                                                                                                                                                                                                                                                                                                                                                                                                                                                                                                                                                                                                                                                                                                                                                                                                                                                                                                                                                                                                                                                                                                                                                                                                                                                  | 1.11504  | -2.32116 |         |          |   |          |         |          |   |          |         |          |   |          |         |          |   |          |         |          |   |          |         |          |   |          |         |          |   |          |          |         |   |          |         |          |   |          |          |          |   |          |         |          |   |          |         |          |   |         |          |          |   |         |          |         |   |         |          |          |   |         |          |         |   |          |          |         |   |         |          |          |   |         |          |          |   |         |          |          |   |         |          |         |   |         |          |          |   |         |          |         |   |          |         |         |
| N                                                                                                                                                                                                             | -1.87211                                                                                                                                                                                                                                                                                                                                                                                                                                                                                                                                                                                                                                                                                                                                                                                                                                                                                                                                                                                                                                                                                                                                                                                                                                                                                                                                                                                                                                                                                                                                                                                                                                                                                                                                                                                                                  | 2.21995  | -0.61706 |         |          |   |          |         |          |   |          |         |          |   |          |         |          |   |          |         |          |   |          |         |          |   |          |         |          |   |          |          |         |   |          |         |          |   |          |          |          |   |          |         |          |   |          |         |          |   |         |          |          |   |         |          |         |   |         |          |          |   |         |          |         |   |          |          |         |   |         |          |          |   |         |          |          |   |         |          |          |   |         |          |         |   |         |          |          |   |         |          |         |   |          |         |         |
| N                                                                                                                                                                                                             | -0.71354                                                                                                                                                                                                                                                                                                                                                                                                                                                                                                                                                                                                                                                                                                                                                                                                                                                                                                                                                                                                                                                                                                                                                                                                                                                                                                                                                                                                                                                                                                                                                                                                                                                                                                                                                                                                                  | 0.34190  | -0.08316 |         |          |   |          |         |          |   |          |         |          |   |          |         |          |   |          |         |          |   |          |         |          |   |          |         |          |   |          |          |         |   |          |         |          |   |          |          |          |   |          |         |          |   |          |         |          |   |         |          |          |   |         |          |         |   |         |          |          |   |         |          |         |   |          |          |         |   |         |          |          |   |         |          |          |   |         |          |          |   |         |          |         |   |         |          |          |   |         |          |         |   |          |         |         |
| C                                                                                                                                                                                                             | -2.08766                                                                                                                                                                                                                                                                                                                                                                                                                                                                                                                                                                                                                                                                                                                                                                                                                                                                                                                                                                                                                                                                                                                                                                                                                                                                                                                                                                                                                                                                                                                                                                                                                                                                                                                                                                                                                  | 2.04190  | 0.64070  |         |          |   |          |         |          |   |          |         |          |   |          |         |          |   |          |         |          |   |          |         |          |   |          |         |          |   |          |          |         |   |          |         |          |   |          |          |          |   |          |         |          |   |          |         |          |   |         |          |          |   |         |          |         |   |         |          |          |   |         |          |         |   |          |          |         |   |         |          |          |   |         |          |          |   |         |          |          |   |         |          |         |   |         |          |          |   |         |          |         |   |          |         |         |
| C                                                                                                                                                                                                             | -1.37504                                                                                                                                                                                                                                                                                                                                                                                                                                                                                                                                                                                                                                                                                                                                                                                                                                                                                                                                                                                                                                                                                                                                                                                                                                                                                                                                                                                                                                                                                                                                                                                                                                                                                                                                                                                                                  | 0.83373  | 1.10800  |         |          |   |          |         |          |   |          |         |          |   |          |         |          |   |          |         |          |   |          |         |          |   |          |         |          |   |          |          |         |   |          |         |          |   |          |          |          |   |          |         |          |   |          |         |          |   |         |          |          |   |         |          |         |   |         |          |          |   |         |          |         |   |          |          |         |   |         |          |          |   |         |          |          |   |         |          |          |   |         |          |         |   |         |          |          |   |         |          |         |   |          |         |         |
| H                                                                                                                                                                                                             | -2.70964                                                                                                                                                                                                                                                                                                                                                                                                                                                                                                                                                                                                                                                                                                                                                                                                                                                                                                                                                                                                                                                                                                                                                                                                                                                                                                                                                                                                                                                                                                                                                                                                                                                                                                                                                                                                                  | 2.69917  | 1.24955  |         |          |   |          |         |          |   |          |         |          |   |          |         |          |   |          |         |          |   |          |         |          |   |          |         |          |   |          |          |         |   |          |         |          |   |          |          |          |   |          |         |          |   |          |         |          |   |         |          |          |   |         |          |         |   |         |          |          |   |         |          |         |   |          |          |         |   |         |          |          |   |         |          |          |   |         |          |          |   |         |          |         |   |         |          |          |   |         |          |         |   |          |         |         |
| H                                                                                                                                                                                                             | -2.08791                                                                                                                                                                                                                                                                                                                                                                                                                                                                                                                                                                                                                                                                                                                                                                                                                                                                                                                                                                                                                                                                                                                                                                                                                                                                                                                                                                                                                                                                                                                                                                                                                                                                                                                                                                                                                  | 0.10301  | 1.53202  |         |          |   |          |         |          |   |          |         |          |   |          |         |          |   |          |         |          |   |          |         |          |   |          |         |          |   |          |          |         |   |          |         |          |   |          |          |          |   |          |         |          |   |          |         |          |   |         |          |          |   |         |          |         |   |         |          |          |   |         |          |         |   |          |          |         |   |         |          |          |   |         |          |          |   |         |          |          |   |         |          |         |   |         |          |          |   |         |          |         |   |          |         |         |
| C                                                                                                                                                                                                             | -2.36214                                                                                                                                                                                                                                                                                                                                                                                                                                                                                                                                                                                                                                                                                                                                                                                                                                                                                                                                                                                                                                                                                                                                                                                                                                                                                                                                                                                                                                                                                                                                                                                                                                                                                                                                                                                                                  | 3.26990  | -1.50694 |         |          |   |          |         |          |   |          |         |          |   |          |         |          |   |          |         |          |   |          |         |          |   |          |         |          |   |          |          |         |   |          |         |          |   |          |          |          |   |          |         |          |   |          |         |          |   |         |          |          |   |         |          |         |   |         |          |          |   |         |          |         |   |          |          |         |   |         |          |          |   |         |          |          |   |         |          |          |   |         |          |         |   |         |          |          |   |         |          |         |   |          |         |         |
| H                                                                                                                                                                                                             | -2.01467                                                                                                                                                                                                                                                                                                                                                                                                                                                                                                                                                                                                                                                                                                                                                                                                                                                                                                                                                                                                                                                                                                                                                                                                                                                                                                                                                                                                                                                                                                                                                                                                                                                                                                                                                                                                                  | 4.24637  | -1.14836 |         |          |   |          |         |          |   |          |         |          |   |          |         |          |   |          |         |          |   |          |         |          |   |          |         |          |   |          |          |         |   |          |         |          |   |          |          |          |   |          |         |          |   |          |         |          |   |         |          |          |   |         |          |         |   |         |          |          |   |         |          |         |   |          |          |         |   |         |          |          |   |         |          |          |   |         |          |          |   |         |          |         |   |         |          |          |   |         |          |         |   |          |         |         |
| H                                                                                                                                                                                                             | -1.95154                                                                                                                                                                                                                                                                                                                                                                                                                                                                                                                                                                                                                                                                                                                                                                                                                                                                                                                                                                                                                                                                                                                                                                                                                                                                                                                                                                                                                                                                                                                                                                                                                                                                                                                                                                                                                  | 3.06141  | -2.50158 |         |          |   |          |         |          |   |          |         |          |   |          |         |          |   |          |         |          |   |          |         |          |   |          |         |          |   |          |          |         |   |          |         |          |   |          |          |          |   |          |         |          |   |          |         |          |   |         |          |          |   |         |          |         |   |         |          |          |   |         |          |         |   |          |          |         |   |         |          |          |   |         |          |          |   |         |          |          |   |         |          |         |   |         |          |          |   |         |          |         |   |          |         |         |
| H                                                                                                                                                                                                             | -3.45825                                                                                                                                                                                                                                                                                                                                                                                                                                                                                                                                                                                                                                                                                                                                                                                                                                                                                                                                                                                                                                                                                                                                                                                                                                                                                                                                                                                                                                                                                                                                                                                                                                                                                                                                                                                                                  | 3.24504  | -1.53466 |         |          |   |          |         |          |   |          |         |          |   |          |         |          |   |          |         |          |   |          |         |          |   |          |         |          |   |          |          |         |   |          |         |          |   |          |          |          |   |          |         |          |   |          |         |          |   |         |          |          |   |         |          |         |   |         |          |          |   |         |          |         |   |          |          |         |   |         |          |          |   |         |          |          |   |         |          |          |   |         |          |         |   |         |          |          |   |         |          |         |   |          |         |         |
| C                                                                                                                                                                                                             | 0.10308                                                                                                                                                                                                                                                                                                                                                                                                                                                                                                                                                                                                                                                                                                                                                                                                                                                                                                                                                                                                                                                                                                                                                                                                                                                                                                                                                                                                                                                                                                                                                                                                                                                                                                                                                                                                                   | -0.83248 | -0.07622 |         |          |   |          |         |          |   |          |         |          |   |          |         |          |   |          |         |          |   |          |         |          |   |          |         |          |   |          |          |         |   |          |         |          |   |          |          |          |   |          |         |          |   |          |         |          |   |         |          |          |   |         |          |         |   |         |          |          |   |         |          |         |   |          |          |         |   |         |          |          |   |         |          |          |   |         |          |          |   |         |          |         |   |         |          |          |   |         |          |         |   |          |         |         |
| C                                                                                                                                                                                                             | 0.23929                                                                                                                                                                                                                                                                                                                                                                                                                                                                                                                                                                                                                                                                                                                                                                                                                                                                                                                                                                                                                                                                                                                                                                                                                                                                                                                                                                                                                                                                                                                                                                                                                                                                                                                                                                                                                   | -1.54964 | 1.12041  |         |          |   |          |         |          |   |          |         |          |   |          |         |          |   |          |         |          |   |          |         |          |   |          |         |          |   |          |          |         |   |          |         |          |   |          |          |          |   |          |         |          |   |          |         |          |   |         |          |          |   |         |          |         |   |         |          |          |   |         |          |         |   |          |          |         |   |         |          |          |   |         |          |          |   |         |          |          |   |         |          |         |   |         |          |          |   |         |          |         |   |          |         |         |
| C                                                                                                                                                                                                             | 0.75731                                                                                                                                                                                                                                                                                                                                                                                                                                                                                                                                                                                                                                                                                                                                                                                                                                                                                                                                                                                                                                                                                                                                                                                                                                                                                                                                                                                                                                                                                                                                                                                                                                                                                                                                                                                                                   | -1.25942 | -1.24093 |         |          |   |          |         |          |   |          |         |          |   |          |         |          |   |          |         |          |   |          |         |          |   |          |         |          |   |          |          |         |   |          |         |          |   |          |          |          |   |          |         |          |   |          |         |          |   |         |          |          |   |         |          |         |   |         |          |          |   |         |          |         |   |          |          |         |   |         |          |          |   |         |          |          |   |         |          |          |   |         |          |         |   |         |          |          |   |         |          |         |   |          |         |         |
| C                                                                                                                                                                                                             | 1.03206                                                                                                                                                                                                                                                                                                                                                                                                                                                                                                                                                                                                                                                                                                                                                                                                                                                                                                                                                                                                                                                                                                                                                                                                                                                                                                                                                                                                                                                                                                                                                                                                                                                                                                                                                                                                                   | -2.69529 | 1.14894  |         |          |   |          |         |          |   |          |         |          |   |          |         |          |   |          |         |          |   |          |         |          |   |          |         |          |   |          |          |         |   |          |         |          |   |          |          |          |   |          |         |          |   |          |         |          |   |         |          |          |   |         |          |         |   |         |          |          |   |         |          |         |   |          |          |         |   |         |          |          |   |         |          |          |   |         |          |          |   |         |          |         |   |         |          |          |   |         |          |         |   |          |         |         |
| H                                                                                                                                                                                                             | -0.26120                                                                                                                                                                                                                                                                                                                                                                                                                                                                                                                                                                                                                                                                                                                                                                                                                                                                                                                                                                                                                                                                                                                                                                                                                                                                                                                                                                                                                                                                                                                                                                                                                                                                                                                                                                                                                  | -1.23488 | 2.03608  |         |          |   |          |         |          |   |          |         |          |   |          |         |          |   |          |         |          |   |          |         |          |   |          |         |          |   |          |          |         |   |          |         |          |   |          |          |          |   |          |         |          |   |          |         |          |   |         |          |          |   |         |          |         |   |         |          |          |   |         |          |         |   |          |          |         |   |         |          |          |   |         |          |          |   |         |          |          |   |         |          |         |   |         |          |          |   |         |          |         |   |          |         |         |
| C                                                                                                                                                                                                             | 1.54579                                                                                                                                                                                                                                                                                                                                                                                                                                                                                                                                                                                                                                                                                                                                                                                                                                                                                                                                                                                                                                                                                                                                                                                                                                                                                                                                                                                                                                                                                                                                                                                                                                                                                                                                                                                                                   | -2.40837 | -1.19077 |         |          |   |          |         |          |   |          |         |          |   |          |         |          |   |          |         |          |   |          |         |          |   |          |         |          |   |          |          |         |   |          |         |          |   |          |          |          |   |          |         |          |   |          |         |          |   |         |          |          |   |         |          |         |   |         |          |          |   |         |          |         |   |          |          |         |   |         |          |          |   |         |          |          |   |         |          |          |   |         |          |         |   |         |          |          |   |         |          |         |   |          |         |         |
| H                                                                                                                                                                                                             | 0.65386                                                                                                                                                                                                                                                                                                                                                                                                                                                                                                                                                                                                                                                                                                                                                                                                                                                                                                                                                                                                                                                                                                                                                                                                                                                                                                                                                                                                                                                                                                                                                                                                                                                                                                                                                                                                                   | -0.70658 | -2.17069 |         |          |   |          |         |          |   |          |         |          |   |          |         |          |   |          |         |          |   |          |         |          |   |          |         |          |   |          |          |         |   |          |         |          |   |          |          |          |   |          |         |          |   |          |         |          |   |         |          |          |   |         |          |         |   |         |          |          |   |         |          |         |   |          |          |         |   |         |          |          |   |         |          |          |   |         |          |          |   |         |          |         |   |         |          |          |   |         |          |         |   |          |         |         |
| C                                                                                                                                                                                                             | 1.68802                                                                                                                                                                                                                                                                                                                                                                                                                                                                                                                                                                                                                                                                                                                                                                                                                                                                                                                                                                                                                                                                                                                                                                                                                                                                                                                                                                                                                                                                                                                                                                                                                                                                                                                                                                                                                   | -3.12928 | -0.00468 |         |          |   |          |         |          |   |          |         |          |   |          |         |          |   |          |         |          |   |          |         |          |   |          |         |          |   |          |          |         |   |          |         |          |   |          |          |          |   |          |         |          |   |          |         |          |   |         |          |          |   |         |          |         |   |         |          |          |   |         |          |         |   |          |          |         |   |         |          |          |   |         |          |          |   |         |          |          |   |         |          |         |   |         |          |          |   |         |          |         |   |          |         |         |
| H                                                                                                                                                                                                             | 1.13430                                                                                                                                                                                                                                                                                                                                                                                                                                                                                                                                                                                                                                                                                                                                                                                                                                                                                                                                                                                                                                                                                                                                                                                                                                                                                                                                                                                                                                                                                                                                                                                                                                                                                                                                                                                                                   | -3.24944 | 2.08216  |         |          |   |          |         |          |   |          |         |          |   |          |         |          |   |          |         |          |   |          |         |          |   |          |         |          |   |          |          |         |   |          |         |          |   |          |          |          |   |          |         |          |   |          |         |          |   |         |          |          |   |         |          |         |   |         |          |          |   |         |          |         |   |          |          |         |   |         |          |          |   |         |          |          |   |         |          |          |   |         |          |         |   |         |          |          |   |         |          |         |   |          |         |         |
| H                                                                                                                                                                                                             | 2.05363                                                                                                                                                                                                                                                                                                                                                                                                                                                                                                                                                                                                                                                                                                                                                                                                                                                                                                                                                                                                                                                                                                                                                                                                                                                                                                                                                                                                                                                                                                                                                                                                                                                                                                                                                                                                                   | -2.73824 | -2.09735 |         |          |   |          |         |          |   |          |         |          |   |          |         |          |   |          |         |          |   |          |         |          |   |          |         |          |   |          |          |         |   |          |         |          |   |          |          |          |   |          |         |          |   |          |         |          |   |         |          |          |   |         |          |         |   |         |          |          |   |         |          |         |   |          |          |         |   |         |          |          |   |         |          |          |   |         |          |          |   |         |          |         |   |         |          |          |   |         |          |         |   |          |         |         |
| H                                                                                                                                                                                                             | 2.30710                                                                                                                                                                                                                                                                                                                                                                                                                                                                                                                                                                                                                                                                                                                                                                                                                                                                                                                                                                                                                                                                                                                                                                                                                                                                                                                                                                                                                                                                                                                                                                                                                                                                                                                                                                                                                   | -4.02600 | 0.02248  |         |          |   |          |         |          |   |          |         |          |   |          |         |          |   |          |         |          |   |          |         |          |   |          |         |          |   |          |          |         |   |          |         |          |   |          |          |          |   |          |         |          |   |          |         |          |   |         |          |          |   |         |          |         |   |         |          |          |   |         |          |         |   |          |          |         |   |         |          |          |   |         |          |          |   |         |          |          |   |         |          |         |   |         |          |          |   |         |          |         |   |          |         |         |
| H                                                                                                                                                                                                             | -0.66121                                                                                                                                                                                                                                                                                                                                                                                                                                                                                                                                                                                                                                                                                                                                                                                                                                                                                                                                                                                                                                                                                                                                                                                                                                                                                                                                                                                                                                                                                                                                                                                                                                                                                                                                                                                                                  | 1.09182  | 1.91185  |         |          |   |          |         |          |   |          |         |          |   |          |         |          |   |          |         |          |   |          |         |          |   |          |         |          |   |          |          |         |   |          |         |          |   |          |          |          |   |          |         |          |   |          |         |          |   |         |          |          |   |         |          |         |   |         |          |          |   |         |          |         |   |          |          |         |   |         |          |          |   |         |          |          |   |         |          |          |   |         |          |         |   |         |          |          |   |         |          |         |   |          |         |         |
| <b>2-HYDROXYIMIDAZOLIUM CATIONS (O-PROTONATED IMIDAZOLES 1a-e), B3PW91/def2-TZVPD // PBE/def2-TZVPD</b>                                                                                                       |                                                                                                                                                                                                                                                                                                                                                                                                                                                                                                                                                                                                                                                                                                                                                                                                                                                                                                                                                                                                                                                                                                                                                                                                                                                                                                                                                                                                                                                                                                                                                                                                                                                                                                                                                                                                                           |          |          |         |          |   |          |         |          |   |          |         |          |   |          |         |          |   |          |         |          |   |          |         |          |   |          |         |          |   |          |          |         |   |          |         |          |   |          |          |          |   |          |         |          |   |          |         |          |   |         |          |          |   |         |          |         |   |         |          |          |   |         |          |         |   |          |          |         |   |         |          |          |   |         |          |          |   |         |          |          |   |         |          |         |   |         |          |          |   |         |          |         |   |          |         |         |
| <p style="text-align: center;">Molecule: <b>1a_OH</b></p>  <p style="text-align: center;">Energy = -301.748381 Hartree</p> | <p style="text-align: center;">11</p> <table border="0"> <tbody> <tr><td>C</td><td>-0.35704</td><td>1.67393</td><td>-0.03397</td></tr> <tr><td>O</td><td>0.86366</td><td>2.16701</td><td>-0.01207</td></tr> <tr><td>N</td><td>-1.44103</td><td>2.46070</td><td>-0.10490</td></tr> <tr><td>N</td><td>-0.78900</td><td>0.39987</td><td>0.01754</td></tr> <tr><td>C</td><td>-2.59138</td><td>1.67605</td><td>-0.09814</td></tr> <tr><td>C</td><td>-2.18537</td><td>0.38259</td><td>-0.02277</td></tr> <tr><td>H</td><td>-3.58269</td><td>2.10943</td><td>-0.14827</td></tr> <tr><td>H</td><td>-2.74644</td><td>-0.54337</td><td>0.00552</td></tr> <tr><td>H</td><td>-1.39977</td><td>3.47677</td><td>-0.15658</td></tr> <tr><td>H</td><td>-0.19572</td><td>-0.42360</td><td>0.08392</td></tr> <tr><td>H</td><td>1.56278</td><td>1.48463</td><td>-0.02328</td></tr> </tbody> </table>                                                                                                                                                                                                                                                                                                                                                                                                                                                                                                                                                                                                                                                                                                                                                                                                                                                                                                                                         | C        | -0.35704 | 1.67393 | -0.03397 | O | 0.86366  | 2.16701 | -0.01207 | N | -1.44103 | 2.46070 | -0.10490 | N | -0.78900 | 0.39987 | 0.01754  | C | -2.59138 | 1.67605 | -0.09814 | C | -2.18537 | 0.38259 | -0.02277 | H | -3.58269 | 2.10943 | -0.14827 | H | -2.74644 | -0.54337 | 0.00552 | H | -1.39977 | 3.47677 | -0.15658 | H | -0.19572 | -0.42360 | 0.08392  | H | 1.56278  | 1.48463 | -0.02328 |   |          |         |          |   |         |          |          |   |         |          |         |   |         |          |          |   |         |          |         |   |          |          |         |   |         |          |          |   |         |          |          |   |         |          |          |   |         |          |         |   |         |          |          |   |         |          |         |   |          |         |         |
| C                                                                                                                                                                                                             | -0.35704                                                                                                                                                                                                                                                                                                                                                                                                                                                                                                                                                                                                                                                                                                                                                                                                                                                                                                                                                                                                                                                                                                                                                                                                                                                                                                                                                                                                                                                                                                                                                                                                                                                                                                                                                                                                                  | 1.67393  | -0.03397 |         |          |   |          |         |          |   |          |         |          |   |          |         |          |   |          |         |          |   |          |         |          |   |          |         |          |   |          |          |         |   |          |         |          |   |          |          |          |   |          |         |          |   |          |         |          |   |         |          |          |   |         |          |         |   |         |          |          |   |         |          |         |   |          |          |         |   |         |          |          |   |         |          |          |   |         |          |          |   |         |          |         |   |         |          |          |   |         |          |         |   |          |         |         |
| O                                                                                                                                                                                                             | 0.86366                                                                                                                                                                                                                                                                                                                                                                                                                                                                                                                                                                                                                                                                                                                                                                                                                                                                                                                                                                                                                                                                                                                                                                                                                                                                                                                                                                                                                                                                                                                                                                                                                                                                                                                                                                                                                   | 2.16701  | -0.01207 |         |          |   |          |         |          |   |          |         |          |   |          |         |          |   |          |         |          |   |          |         |          |   |          |         |          |   |          |          |         |   |          |         |          |   |          |          |          |   |          |         |          |   |          |         |          |   |         |          |          |   |         |          |         |   |         |          |          |   |         |          |         |   |          |          |         |   |         |          |          |   |         |          |          |   |         |          |          |   |         |          |         |   |         |          |          |   |         |          |         |   |          |         |         |
| N                                                                                                                                                                                                             | -1.44103                                                                                                                                                                                                                                                                                                                                                                                                                                                                                                                                                                                                                                                                                                                                                                                                                                                                                                                                                                                                                                                                                                                                                                                                                                                                                                                                                                                                                                                                                                                                                                                                                                                                                                                                                                                                                  | 2.46070  | -0.10490 |         |          |   |          |         |          |   |          |         |          |   |          |         |          |   |          |         |          |   |          |         |          |   |          |         |          |   |          |          |         |   |          |         |          |   |          |          |          |   |          |         |          |   |          |         |          |   |         |          |          |   |         |          |         |   |         |          |          |   |         |          |         |   |          |          |         |   |         |          |          |   |         |          |          |   |         |          |          |   |         |          |         |   |         |          |          |   |         |          |         |   |          |         |         |
| N                                                                                                                                                                                                             | -0.78900                                                                                                                                                                                                                                                                                                                                                                                                                                                                                                                                                                                                                                                                                                                                                                                                                                                                                                                                                                                                                                                                                                                                                                                                                                                                                                                                                                                                                                                                                                                                                                                                                                                                                                                                                                                                                  | 0.39987  | 0.01754  |         |          |   |          |         |          |   |          |         |          |   |          |         |          |   |          |         |          |   |          |         |          |   |          |         |          |   |          |          |         |   |          |         |          |   |          |          |          |   |          |         |          |   |          |         |          |   |         |          |          |   |         |          |         |   |         |          |          |   |         |          |         |   |          |          |         |   |         |          |          |   |         |          |          |   |         |          |          |   |         |          |         |   |         |          |          |   |         |          |         |   |          |         |         |
| C                                                                                                                                                                                                             | -2.59138                                                                                                                                                                                                                                                                                                                                                                                                                                                                                                                                                                                                                                                                                                                                                                                                                                                                                                                                                                                                                                                                                                                                                                                                                                                                                                                                                                                                                                                                                                                                                                                                                                                                                                                                                                                                                  | 1.67605  | -0.09814 |         |          |   |          |         |          |   |          |         |          |   |          |         |          |   |          |         |          |   |          |         |          |   |          |         |          |   |          |          |         |   |          |         |          |   |          |          |          |   |          |         |          |   |          |         |          |   |         |          |          |   |         |          |         |   |         |          |          |   |         |          |         |   |          |          |         |   |         |          |          |   |         |          |          |   |         |          |          |   |         |          |         |   |         |          |          |   |         |          |         |   |          |         |         |
| C                                                                                                                                                                                                             | -2.18537                                                                                                                                                                                                                                                                                                                                                                                                                                                                                                                                                                                                                                                                                                                                                                                                                                                                                                                                                                                                                                                                                                                                                                                                                                                                                                                                                                                                                                                                                                                                                                                                                                                                                                                                                                                                                  | 0.38259  | -0.02277 |         |          |   |          |         |          |   |          |         |          |   |          |         |          |   |          |         |          |   |          |         |          |   |          |         |          |   |          |          |         |   |          |         |          |   |          |          |          |   |          |         |          |   |          |         |          |   |         |          |          |   |         |          |         |   |         |          |          |   |         |          |         |   |          |          |         |   |         |          |          |   |         |          |          |   |         |          |          |   |         |          |         |   |         |          |          |   |         |          |         |   |          |         |         |
| H                                                                                                                                                                                                             | -3.58269                                                                                                                                                                                                                                                                                                                                                                                                                                                                                                                                                                                                                                                                                                                                                                                                                                                                                                                                                                                                                                                                                                                                                                                                                                                                                                                                                                                                                                                                                                                                                                                                                                                                                                                                                                                                                  | 2.10943  | -0.14827 |         |          |   |          |         |          |   |          |         |          |   |          |         |          |   |          |         |          |   |          |         |          |   |          |         |          |   |          |          |         |   |          |         |          |   |          |          |          |   |          |         |          |   |          |         |          |   |         |          |          |   |         |          |         |   |         |          |          |   |         |          |         |   |          |          |         |   |         |          |          |   |         |          |          |   |         |          |          |   |         |          |         |   |         |          |          |   |         |          |         |   |          |         |         |
| H                                                                                                                                                                                                             | -2.74644                                                                                                                                                                                                                                                                                                                                                                                                                                                                                                                                                                                                                                                                                                                                                                                                                                                                                                                                                                                                                                                                                                                                                                                                                                                                                                                                                                                                                                                                                                                                                                                                                                                                                                                                                                                                                  | -0.54337 | 0.00552  |         |          |   |          |         |          |   |          |         |          |   |          |         |          |   |          |         |          |   |          |         |          |   |          |         |          |   |          |          |         |   |          |         |          |   |          |          |          |   |          |         |          |   |          |         |          |   |         |          |          |   |         |          |         |   |         |          |          |   |         |          |         |   |          |          |         |   |         |          |          |   |         |          |          |   |         |          |          |   |         |          |         |   |         |          |          |   |         |          |         |   |          |         |         |
| H                                                                                                                                                                                                             | -1.39977                                                                                                                                                                                                                                                                                                                                                                                                                                                                                                                                                                                                                                                                                                                                                                                                                                                                                                                                                                                                                                                                                                                                                                                                                                                                                                                                                                                                                                                                                                                                                                                                                                                                                                                                                                                                                  | 3.47677  | -0.15658 |         |          |   |          |         |          |   |          |         |          |   |          |         |          |   |          |         |          |   |          |         |          |   |          |         |          |   |          |          |         |   |          |         |          |   |          |          |          |   |          |         |          |   |          |         |          |   |         |          |          |   |         |          |         |   |         |          |          |   |         |          |         |   |          |          |         |   |         |          |          |   |         |          |          |   |         |          |          |   |         |          |         |   |         |          |          |   |         |          |         |   |          |         |         |
| H                                                                                                                                                                                                             | -0.19572                                                                                                                                                                                                                                                                                                                                                                                                                                                                                                                                                                                                                                                                                                                                                                                                                                                                                                                                                                                                                                                                                                                                                                                                                                                                                                                                                                                                                                                                                                                                                                                                                                                                                                                                                                                                                  | -0.42360 | 0.08392  |         |          |   |          |         |          |   |          |         |          |   |          |         |          |   |          |         |          |   |          |         |          |   |          |         |          |   |          |          |         |   |          |         |          |   |          |          |          |   |          |         |          |   |          |         |          |   |         |          |          |   |         |          |         |   |         |          |          |   |         |          |         |   |          |          |         |   |         |          |          |   |         |          |          |   |         |          |          |   |         |          |         |   |         |          |          |   |         |          |         |   |          |         |         |
| H                                                                                                                                                                                                             | 1.56278                                                                                                                                                                                                                                                                                                                                                                                                                                                                                                                                                                                                                                                                                                                                                                                                                                                                                                                                                                                                                                                                                                                                                                                                                                                                                                                                                                                                                                                                                                                                                                                                                                                                                                                                                                                                                   | 1.48463  | -0.02328 |         |          |   |          |         |          |   |          |         |          |   |          |         |          |   |          |         |          |   |          |         |          |   |          |         |          |   |          |          |         |   |          |         |          |   |          |          |          |   |          |         |          |   |          |         |          |   |         |          |          |   |         |          |         |   |         |          |          |   |         |          |         |   |          |          |         |   |         |          |          |   |         |          |          |   |         |          |          |   |         |          |         |   |         |          |          |   |         |          |         |   |          |         |         |

|                                                                                                                                                      |                                                                                                                                                                                                                                                                                                                                                                                                                                                                                                                                                                                                                                                                                                                                                                                                                                                                                                                                                                                                                                                                                                                                                                                                                                                                                     |          |          |         |         |   |         |         |         |   |          |         |          |   |          |         |         |   |          |         |          |   |          |         |          |   |          |         |          |   |          |          |          |   |          |          |          |   |          |         |          |   |          |         |          |   |          |         |          |   |          |          |         |   |         |          |          |   |         |          |         |   |          |          |         |   |         |         |         |
|------------------------------------------------------------------------------------------------------------------------------------------------------|-------------------------------------------------------------------------------------------------------------------------------------------------------------------------------------------------------------------------------------------------------------------------------------------------------------------------------------------------------------------------------------------------------------------------------------------------------------------------------------------------------------------------------------------------------------------------------------------------------------------------------------------------------------------------------------------------------------------------------------------------------------------------------------------------------------------------------------------------------------------------------------------------------------------------------------------------------------------------------------------------------------------------------------------------------------------------------------------------------------------------------------------------------------------------------------------------------------------------------------------------------------------------------------|----------|----------|---------|---------|---|---------|---------|---------|---|----------|---------|----------|---|----------|---------|---------|---|----------|---------|----------|---|----------|---------|----------|---|----------|---------|----------|---|----------|----------|----------|---|----------|----------|----------|---|----------|---------|----------|---|----------|---------|----------|---|----------|---------|----------|---|----------|----------|---------|---|---------|----------|----------|---|---------|----------|---------|---|----------|----------|---------|---|---------|---------|---------|
| <p>Molecule: <b>1b_OH</b></p> 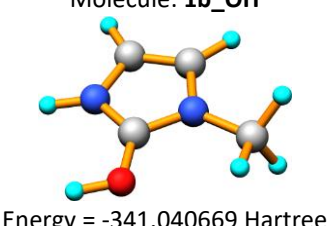 <p>Energy = -341.040669 Hartree</p>  | <p>14</p> <table border="1"> <tbody> <tr><td>C</td><td>-0.36638</td><td>1.68051</td><td>0.00523</td></tr> <tr><td>O</td><td>0.86026</td><td>2.16822</td><td>0.06866</td></tr> <tr><td>N</td><td>-1.44139</td><td>2.47549</td><td>-0.11246</td></tr> <tr><td>N</td><td>-0.78922</td><td>0.40007</td><td>0.02973</td></tr> <tr><td>C</td><td>-2.58095</td><td>1.67176</td><td>-0.16945</td></tr> <tr><td>C</td><td>-2.17882</td><td>0.37819</td><td>-0.07840</td></tr> <tr><td>H</td><td>-3.57091</td><td>2.10110</td><td>-0.26584</td></tr> <tr><td>H</td><td>-2.73976</td><td>-0.54817</td><td>-0.07686</td></tr> <tr><td>H</td><td>-0.19301</td><td>-0.41931</td><td>0.10978</td></tr> <tr><td>C</td><td>-1.41294</td><td>3.93830</td><td>-0.19275</td></tr> <tr><td>H</td><td>-0.42629</td><td>4.29423</td><td>0.11905</td></tr> <tr><td>H</td><td>-1.61111</td><td>4.25686</td><td>-1.22373</td></tr> <tr><td>H</td><td>-2.17765</td><td>4.34478</td><td>0.47846</td></tr> <tr><td>H</td><td>1.54116</td><td>1.48396</td><td>0.21457</td></tr> </tbody> </table>                                                                                                                                                                                                                 | C        | -0.36638 | 1.68051 | 0.00523 | O | 0.86026 | 2.16822 | 0.06866 | N | -1.44139 | 2.47549 | -0.11246 | N | -0.78922 | 0.40007 | 0.02973 | C | -2.58095 | 1.67176 | -0.16945 | C | -2.17882 | 0.37819 | -0.07840 | H | -3.57091 | 2.10110 | -0.26584 | H | -2.73976 | -0.54817 | -0.07686 | H | -0.19301 | -0.41931 | 0.10978  | C | -1.41294 | 3.93830 | -0.19275 | H | -0.42629 | 4.29423 | 0.11905  | H | -1.61111 | 4.25686 | -1.22373 | H | -2.17765 | 4.34478  | 0.47846 | H | 1.54116 | 1.48396  | 0.21457  |   |         |          |         |   |          |          |         |   |         |         |         |
| C                                                                                                                                                    | -0.36638                                                                                                                                                                                                                                                                                                                                                                                                                                                                                                                                                                                                                                                                                                                                                                                                                                                                                                                                                                                                                                                                                                                                                                                                                                                                            | 1.68051  | 0.00523  |         |         |   |         |         |         |   |          |         |          |   |          |         |         |   |          |         |          |   |          |         |          |   |          |         |          |   |          |          |          |   |          |          |          |   |          |         |          |   |          |         |          |   |          |         |          |   |          |          |         |   |         |          |          |   |         |          |         |   |          |          |         |   |         |         |         |
| O                                                                                                                                                    | 0.86026                                                                                                                                                                                                                                                                                                                                                                                                                                                                                                                                                                                                                                                                                                                                                                                                                                                                                                                                                                                                                                                                                                                                                                                                                                                                             | 2.16822  | 0.06866  |         |         |   |         |         |         |   |          |         |          |   |          |         |         |   |          |         |          |   |          |         |          |   |          |         |          |   |          |          |          |   |          |          |          |   |          |         |          |   |          |         |          |   |          |         |          |   |          |          |         |   |         |          |          |   |         |          |         |   |          |          |         |   |         |         |         |
| N                                                                                                                                                    | -1.44139                                                                                                                                                                                                                                                                                                                                                                                                                                                                                                                                                                                                                                                                                                                                                                                                                                                                                                                                                                                                                                                                                                                                                                                                                                                                            | 2.47549  | -0.11246 |         |         |   |         |         |         |   |          |         |          |   |          |         |         |   |          |         |          |   |          |         |          |   |          |         |          |   |          |          |          |   |          |          |          |   |          |         |          |   |          |         |          |   |          |         |          |   |          |          |         |   |         |          |          |   |         |          |         |   |          |          |         |   |         |         |         |
| N                                                                                                                                                    | -0.78922                                                                                                                                                                                                                                                                                                                                                                                                                                                                                                                                                                                                                                                                                                                                                                                                                                                                                                                                                                                                                                                                                                                                                                                                                                                                            | 0.40007  | 0.02973  |         |         |   |         |         |         |   |          |         |          |   |          |         |         |   |          |         |          |   |          |         |          |   |          |         |          |   |          |          |          |   |          |          |          |   |          |         |          |   |          |         |          |   |          |         |          |   |          |          |         |   |         |          |          |   |         |          |         |   |          |          |         |   |         |         |         |
| C                                                                                                                                                    | -2.58095                                                                                                                                                                                                                                                                                                                                                                                                                                                                                                                                                                                                                                                                                                                                                                                                                                                                                                                                                                                                                                                                                                                                                                                                                                                                            | 1.67176  | -0.16945 |         |         |   |         |         |         |   |          |         |          |   |          |         |         |   |          |         |          |   |          |         |          |   |          |         |          |   |          |          |          |   |          |          |          |   |          |         |          |   |          |         |          |   |          |         |          |   |          |          |         |   |         |          |          |   |         |          |         |   |          |          |         |   |         |         |         |
| C                                                                                                                                                    | -2.17882                                                                                                                                                                                                                                                                                                                                                                                                                                                                                                                                                                                                                                                                                                                                                                                                                                                                                                                                                                                                                                                                                                                                                                                                                                                                            | 0.37819  | -0.07840 |         |         |   |         |         |         |   |          |         |          |   |          |         |         |   |          |         |          |   |          |         |          |   |          |         |          |   |          |          |          |   |          |          |          |   |          |         |          |   |          |         |          |   |          |         |          |   |          |          |         |   |         |          |          |   |         |          |         |   |          |          |         |   |         |         |         |
| H                                                                                                                                                    | -3.57091                                                                                                                                                                                                                                                                                                                                                                                                                                                                                                                                                                                                                                                                                                                                                                                                                                                                                                                                                                                                                                                                                                                                                                                                                                                                            | 2.10110  | -0.26584 |         |         |   |         |         |         |   |          |         |          |   |          |         |         |   |          |         |          |   |          |         |          |   |          |         |          |   |          |          |          |   |          |          |          |   |          |         |          |   |          |         |          |   |          |         |          |   |          |          |         |   |         |          |          |   |         |          |         |   |          |          |         |   |         |         |         |
| H                                                                                                                                                    | -2.73976                                                                                                                                                                                                                                                                                                                                                                                                                                                                                                                                                                                                                                                                                                                                                                                                                                                                                                                                                                                                                                                                                                                                                                                                                                                                            | -0.54817 | -0.07686 |         |         |   |         |         |         |   |          |         |          |   |          |         |         |   |          |         |          |   |          |         |          |   |          |         |          |   |          |          |          |   |          |          |          |   |          |         |          |   |          |         |          |   |          |         |          |   |          |          |         |   |         |          |          |   |         |          |         |   |          |          |         |   |         |         |         |
| H                                                                                                                                                    | -0.19301                                                                                                                                                                                                                                                                                                                                                                                                                                                                                                                                                                                                                                                                                                                                                                                                                                                                                                                                                                                                                                                                                                                                                                                                                                                                            | -0.41931 | 0.10978  |         |         |   |         |         |         |   |          |         |          |   |          |         |         |   |          |         |          |   |          |         |          |   |          |         |          |   |          |          |          |   |          |          |          |   |          |         |          |   |          |         |          |   |          |         |          |   |          |          |         |   |         |          |          |   |         |          |         |   |          |          |         |   |         |         |         |
| C                                                                                                                                                    | -1.41294                                                                                                                                                                                                                                                                                                                                                                                                                                                                                                                                                                                                                                                                                                                                                                                                                                                                                                                                                                                                                                                                                                                                                                                                                                                                            | 3.93830  | -0.19275 |         |         |   |         |         |         |   |          |         |          |   |          |         |         |   |          |         |          |   |          |         |          |   |          |         |          |   |          |          |          |   |          |          |          |   |          |         |          |   |          |         |          |   |          |         |          |   |          |          |         |   |         |          |          |   |         |          |         |   |          |          |         |   |         |         |         |
| H                                                                                                                                                    | -0.42629                                                                                                                                                                                                                                                                                                                                                                                                                                                                                                                                                                                                                                                                                                                                                                                                                                                                                                                                                                                                                                                                                                                                                                                                                                                                            | 4.29423  | 0.11905  |         |         |   |         |         |         |   |          |         |          |   |          |         |         |   |          |         |          |   |          |         |          |   |          |         |          |   |          |          |          |   |          |          |          |   |          |         |          |   |          |         |          |   |          |         |          |   |          |          |         |   |         |          |          |   |         |          |         |   |          |          |         |   |         |         |         |
| H                                                                                                                                                    | -1.61111                                                                                                                                                                                                                                                                                                                                                                                                                                                                                                                                                                                                                                                                                                                                                                                                                                                                                                                                                                                                                                                                                                                                                                                                                                                                            | 4.25686  | -1.22373 |         |         |   |         |         |         |   |          |         |          |   |          |         |         |   |          |         |          |   |          |         |          |   |          |         |          |   |          |          |          |   |          |          |          |   |          |         |          |   |          |         |          |   |          |         |          |   |          |          |         |   |         |          |          |   |         |          |         |   |          |          |         |   |         |         |         |
| H                                                                                                                                                    | -2.17765                                                                                                                                                                                                                                                                                                                                                                                                                                                                                                                                                                                                                                                                                                                                                                                                                                                                                                                                                                                                                                                                                                                                                                                                                                                                            | 4.34478  | 0.47846  |         |         |   |         |         |         |   |          |         |          |   |          |         |         |   |          |         |          |   |          |         |          |   |          |         |          |   |          |          |          |   |          |          |          |   |          |         |          |   |          |         |          |   |          |         |          |   |          |          |         |   |         |          |          |   |         |          |         |   |          |          |         |   |         |         |         |
| H                                                                                                                                                    | 1.54116                                                                                                                                                                                                                                                                                                                                                                                                                                                                                                                                                                                                                                                                                                                                                                                                                                                                                                                                                                                                                                                                                                                                                                                                                                                                             | 1.48396  | 0.21457  |         |         |   |         |         |         |   |          |         |          |   |          |         |         |   |          |         |          |   |          |         |          |   |          |         |          |   |          |          |          |   |          |          |          |   |          |         |          |   |          |         |          |   |          |         |          |   |          |          |         |   |         |          |          |   |         |          |         |   |          |          |         |   |         |         |         |
| <p>Molecule: <b>1c_OH</b></p>  <p>Energy = -380.332365 Hartree</p> | <p>17</p> <table border="1"> <tbody> <tr><td>C</td><td>-0.37424</td><td>1.68897</td><td>0.01439</td></tr> <tr><td>O</td><td>0.85413</td><td>2.17306</td><td>0.11532</td></tr> <tr><td>N</td><td>-1.44969</td><td>2.48567</td><td>-0.10373</td></tr> <tr><td>N</td><td>-0.77405</td><td>0.40085</td><td>0.00089</td></tr> <tr><td>C</td><td>-2.57866</td><td>1.67563</td><td>-0.20173</td></tr> <tr><td>C</td><td>-2.16248</td><td>0.38365</td><td>-0.13350</td></tr> <tr><td>H</td><td>-3.57111</td><td>2.09682</td><td>-0.30678</td></tr> <tr><td>H</td><td>-2.71739</td><td>-0.54614</td><td>-0.16370</td></tr> <tr><td>C</td><td>-1.42068</td><td>3.94859</td><td>-0.16121</td></tr> <tr><td>H</td><td>-0.49302</td><td>4.30678</td><td>0.29630</td></tr> <tr><td>H</td><td>-1.47094</td><td>4.28425</td><td>-1.20474</td></tr> <tr><td>H</td><td>-2.27745</td><td>4.33941</td><td>0.39815</td></tr> <tr><td>C</td><td>0.11008</td><td>-0.75726</td><td>0.11597</td></tr> <tr><td>H</td><td>0.86272</td><td>-0.74494</td><td>-0.68449</td></tr> <tr><td>H</td><td>0.59486</td><td>-0.77801</td><td>1.10187</td></tr> <tr><td>H</td><td>-0.49334</td><td>-1.66351</td><td>0.00618</td></tr> <tr><td>H</td><td>1.52027</td><td>1.47118</td><td>0.24779</td></tr> </tbody> </table> | C        | -0.37424 | 1.68897 | 0.01439 | O | 0.85413 | 2.17306 | 0.11532 | N | -1.44969 | 2.48567 | -0.10373 | N | -0.77405 | 0.40085 | 0.00089 | C | -2.57866 | 1.67563 | -0.20173 | C | -2.16248 | 0.38365 | -0.13350 | H | -3.57111 | 2.09682 | -0.30678 | H | -2.71739 | -0.54614 | -0.16370 | C | -1.42068 | 3.94859  | -0.16121 | H | -0.49302 | 4.30678 | 0.29630  | H | -1.47094 | 4.28425 | -1.20474 | H | -2.27745 | 4.33941 | 0.39815  | C | 0.11008  | -0.75726 | 0.11597 | H | 0.86272 | -0.74494 | -0.68449 | H | 0.59486 | -0.77801 | 1.10187 | H | -0.49334 | -1.66351 | 0.00618 | H | 1.52027 | 1.47118 | 0.24779 |
| C                                                                                                                                                    | -0.37424                                                                                                                                                                                                                                                                                                                                                                                                                                                                                                                                                                                                                                                                                                                                                                                                                                                                                                                                                                                                                                                                                                                                                                                                                                                                            | 1.68897  | 0.01439  |         |         |   |         |         |         |   |          |         |          |   |          |         |         |   |          |         |          |   |          |         |          |   |          |         |          |   |          |          |          |   |          |          |          |   |          |         |          |   |          |         |          |   |          |         |          |   |          |          |         |   |         |          |          |   |         |          |         |   |          |          |         |   |         |         |         |
| O                                                                                                                                                    | 0.85413                                                                                                                                                                                                                                                                                                                                                                                                                                                                                                                                                                                                                                                                                                                                                                                                                                                                                                                                                                                                                                                                                                                                                                                                                                                                             | 2.17306  | 0.11532  |         |         |   |         |         |         |   |          |         |          |   |          |         |         |   |          |         |          |   |          |         |          |   |          |         |          |   |          |          |          |   |          |          |          |   |          |         |          |   |          |         |          |   |          |         |          |   |          |          |         |   |         |          |          |   |         |          |         |   |          |          |         |   |         |         |         |
| N                                                                                                                                                    | -1.44969                                                                                                                                                                                                                                                                                                                                                                                                                                                                                                                                                                                                                                                                                                                                                                                                                                                                                                                                                                                                                                                                                                                                                                                                                                                                            | 2.48567  | -0.10373 |         |         |   |         |         |         |   |          |         |          |   |          |         |         |   |          |         |          |   |          |         |          |   |          |         |          |   |          |          |          |   |          |          |          |   |          |         |          |   |          |         |          |   |          |         |          |   |          |          |         |   |         |          |          |   |         |          |         |   |          |          |         |   |         |         |         |
| N                                                                                                                                                    | -0.77405                                                                                                                                                                                                                                                                                                                                                                                                                                                                                                                                                                                                                                                                                                                                                                                                                                                                                                                                                                                                                                                                                                                                                                                                                                                                            | 0.40085  | 0.00089  |         |         |   |         |         |         |   |          |         |          |   |          |         |         |   |          |         |          |   |          |         |          |   |          |         |          |   |          |          |          |   |          |          |          |   |          |         |          |   |          |         |          |   |          |         |          |   |          |          |         |   |         |          |          |   |         |          |         |   |          |          |         |   |         |         |         |
| C                                                                                                                                                    | -2.57866                                                                                                                                                                                                                                                                                                                                                                                                                                                                                                                                                                                                                                                                                                                                                                                                                                                                                                                                                                                                                                                                                                                                                                                                                                                                            | 1.67563  | -0.20173 |         |         |   |         |         |         |   |          |         |          |   |          |         |         |   |          |         |          |   |          |         |          |   |          |         |          |   |          |          |          |   |          |          |          |   |          |         |          |   |          |         |          |   |          |         |          |   |          |          |         |   |         |          |          |   |         |          |         |   |          |          |         |   |         |         |         |
| C                                                                                                                                                    | -2.16248                                                                                                                                                                                                                                                                                                                                                                                                                                                                                                                                                                                                                                                                                                                                                                                                                                                                                                                                                                                                                                                                                                                                                                                                                                                                            | 0.38365  | -0.13350 |         |         |   |         |         |         |   |          |         |          |   |          |         |         |   |          |         |          |   |          |         |          |   |          |         |          |   |          |          |          |   |          |          |          |   |          |         |          |   |          |         |          |   |          |         |          |   |          |          |         |   |         |          |          |   |         |          |         |   |          |          |         |   |         |         |         |
| H                                                                                                                                                    | -3.57111                                                                                                                                                                                                                                                                                                                                                                                                                                                                                                                                                                                                                                                                                                                                                                                                                                                                                                                                                                                                                                                                                                                                                                                                                                                                            | 2.09682  | -0.30678 |         |         |   |         |         |         |   |          |         |          |   |          |         |         |   |          |         |          |   |          |         |          |   |          |         |          |   |          |          |          |   |          |          |          |   |          |         |          |   |          |         |          |   |          |         |          |   |          |          |         |   |         |          |          |   |         |          |         |   |          |          |         |   |         |         |         |
| H                                                                                                                                                    | -2.71739                                                                                                                                                                                                                                                                                                                                                                                                                                                                                                                                                                                                                                                                                                                                                                                                                                                                                                                                                                                                                                                                                                                                                                                                                                                                            | -0.54614 | -0.16370 |         |         |   |         |         |         |   |          |         |          |   |          |         |         |   |          |         |          |   |          |         |          |   |          |         |          |   |          |          |          |   |          |          |          |   |          |         |          |   |          |         |          |   |          |         |          |   |          |          |         |   |         |          |          |   |         |          |         |   |          |          |         |   |         |         |         |
| C                                                                                                                                                    | -1.42068                                                                                                                                                                                                                                                                                                                                                                                                                                                                                                                                                                                                                                                                                                                                                                                                                                                                                                                                                                                                                                                                                                                                                                                                                                                                            | 3.94859  | -0.16121 |         |         |   |         |         |         |   |          |         |          |   |          |         |         |   |          |         |          |   |          |         |          |   |          |         |          |   |          |          |          |   |          |          |          |   |          |         |          |   |          |         |          |   |          |         |          |   |          |          |         |   |         |          |          |   |         |          |         |   |          |          |         |   |         |         |         |
| H                                                                                                                                                    | -0.49302                                                                                                                                                                                                                                                                                                                                                                                                                                                                                                                                                                                                                                                                                                                                                                                                                                                                                                                                                                                                                                                                                                                                                                                                                                                                            | 4.30678  | 0.29630  |         |         |   |         |         |         |   |          |         |          |   |          |         |         |   |          |         |          |   |          |         |          |   |          |         |          |   |          |          |          |   |          |          |          |   |          |         |          |   |          |         |          |   |          |         |          |   |          |          |         |   |         |          |          |   |         |          |         |   |          |          |         |   |         |         |         |
| H                                                                                                                                                    | -1.47094                                                                                                                                                                                                                                                                                                                                                                                                                                                                                                                                                                                                                                                                                                                                                                                                                                                                                                                                                                                                                                                                                                                                                                                                                                                                            | 4.28425  | -1.20474 |         |         |   |         |         |         |   |          |         |          |   |          |         |         |   |          |         |          |   |          |         |          |   |          |         |          |   |          |          |          |   |          |          |          |   |          |         |          |   |          |         |          |   |          |         |          |   |          |          |         |   |         |          |          |   |         |          |         |   |          |          |         |   |         |         |         |
| H                                                                                                                                                    | -2.27745                                                                                                                                                                                                                                                                                                                                                                                                                                                                                                                                                                                                                                                                                                                                                                                                                                                                                                                                                                                                                                                                                                                                                                                                                                                                            | 4.33941  | 0.39815  |         |         |   |         |         |         |   |          |         |          |   |          |         |         |   |          |         |          |   |          |         |          |   |          |         |          |   |          |          |          |   |          |          |          |   |          |         |          |   |          |         |          |   |          |         |          |   |          |          |         |   |         |          |          |   |         |          |         |   |          |          |         |   |         |         |         |
| C                                                                                                                                                    | 0.11008                                                                                                                                                                                                                                                                                                                                                                                                                                                                                                                                                                                                                                                                                                                                                                                                                                                                                                                                                                                                                                                                                                                                                                                                                                                                             | -0.75726 | 0.11597  |         |         |   |         |         |         |   |          |         |          |   |          |         |         |   |          |         |          |   |          |         |          |   |          |         |          |   |          |          |          |   |          |          |          |   |          |         |          |   |          |         |          |   |          |         |          |   |          |          |         |   |         |          |          |   |         |          |         |   |          |          |         |   |         |         |         |
| H                                                                                                                                                    | 0.86272                                                                                                                                                                                                                                                                                                                                                                                                                                                                                                                                                                                                                                                                                                                                                                                                                                                                                                                                                                                                                                                                                                                                                                                                                                                                             | -0.74494 | -0.68449 |         |         |   |         |         |         |   |          |         |          |   |          |         |         |   |          |         |          |   |          |         |          |   |          |         |          |   |          |          |          |   |          |          |          |   |          |         |          |   |          |         |          |   |          |         |          |   |          |          |         |   |         |          |          |   |         |          |         |   |          |          |         |   |         |         |         |
| H                                                                                                                                                    | 0.59486                                                                                                                                                                                                                                                                                                                                                                                                                                                                                                                                                                                                                                                                                                                                                                                                                                                                                                                                                                                                                                                                                                                                                                                                                                                                             | -0.77801 | 1.10187  |         |         |   |         |         |         |   |          |         |          |   |          |         |         |   |          |         |          |   |          |         |          |   |          |         |          |   |          |          |          |   |          |          |          |   |          |         |          |   |          |         |          |   |          |         |          |   |          |          |         |   |         |          |          |   |         |          |         |   |          |          |         |   |         |         |         |
| H                                                                                                                                                    | -0.49334                                                                                                                                                                                                                                                                                                                                                                                                                                                                                                                                                                                                                                                                                                                                                                                                                                                                                                                                                                                                                                                                                                                                                                                                                                                                            | -1.66351 | 0.00618  |         |         |   |         |         |         |   |          |         |          |   |          |         |         |   |          |         |          |   |          |         |          |   |          |         |          |   |          |          |          |   |          |          |          |   |          |         |          |   |          |         |          |   |          |         |          |   |          |          |         |   |         |          |          |   |         |          |         |   |          |          |         |   |         |         |         |
| H                                                                                                                                                    | 1.52027                                                                                                                                                                                                                                                                                                                                                                                                                                                                                                                                                                                                                                                                                                                                                                                                                                                                                                                                                                                                                                                                                                                                                                                                                                                                             | 1.47118  | 0.24779  |         |         |   |         |         |         |   |          |         |          |   |          |         |         |   |          |         |          |   |          |         |          |   |          |         |          |   |          |          |          |   |          |          |          |   |          |         |          |   |          |         |          |   |          |         |          |   |          |          |         |   |         |          |          |   |         |          |         |   |          |          |         |   |         |         |         |

|                                                                                                                                                       |                                                                                                                                                                                                                                                                                                                                                                                                                                                                                                                                                                                                                                                                                                                                                                                                                                                                                                                                                                                                                                                                                                                                                                                                                                                                                                                                                                                                                                                                                                                                                                                                                                                                                                                                                                                                |          |          |         |          |   |         |         |          |   |          |         |          |   |          |         |          |   |          |         |         |   |          |         |         |   |          |         |         |   |          |          |         |   |          |          |          |   |          |          |          |   |          |          |          |   |          |          |          |   |         |          |          |   |         |          |          |   |          |          |          |   |         |          |          |   |         |          |         |   |         |          |          |   |          |          |          |   |          |          |          |   |         |          |          |   |         |          |          |   |         |          |          |   |         |         |          |
|-------------------------------------------------------------------------------------------------------------------------------------------------------|------------------------------------------------------------------------------------------------------------------------------------------------------------------------------------------------------------------------------------------------------------------------------------------------------------------------------------------------------------------------------------------------------------------------------------------------------------------------------------------------------------------------------------------------------------------------------------------------------------------------------------------------------------------------------------------------------------------------------------------------------------------------------------------------------------------------------------------------------------------------------------------------------------------------------------------------------------------------------------------------------------------------------------------------------------------------------------------------------------------------------------------------------------------------------------------------------------------------------------------------------------------------------------------------------------------------------------------------------------------------------------------------------------------------------------------------------------------------------------------------------------------------------------------------------------------------------------------------------------------------------------------------------------------------------------------------------------------------------------------------------------------------------------------------|----------|----------|---------|----------|---|---------|---------|----------|---|----------|---------|----------|---|----------|---------|----------|---|----------|---------|---------|---|----------|---------|---------|---|----------|---------|---------|---|----------|----------|---------|---|----------|----------|----------|---|----------|----------|----------|---|----------|----------|----------|---|----------|----------|----------|---|---------|----------|----------|---|---------|----------|----------|---|----------|----------|----------|---|---------|----------|----------|---|---------|----------|---------|---|---------|----------|----------|---|----------|----------|----------|---|----------|----------|----------|---|---------|----------|----------|---|---------|----------|----------|---|---------|----------|----------|---|---------|---------|----------|
| <p>Molecule: <b>1d_OH</b></p> 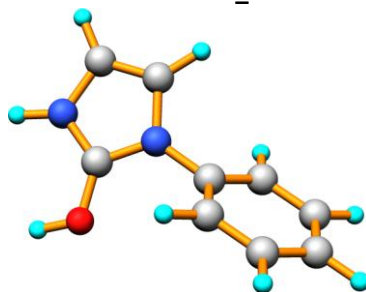 <p>Energy = -532.737539 Hartree</p>   | <p>21</p> <table border="1"> <tbody> <tr><td>C</td><td>-0.75831</td><td>1.34675</td><td>-0.92946</td></tr> <tr><td>O</td><td>0.14908</td><td>1.43039</td><td>-1.88634</td></tr> <tr><td>N</td><td>-1.73718</td><td>2.21421</td><td>-0.59969</td></tr> <tr><td>N</td><td>-0.82587</td><td>0.29917</td><td>-0.08645</td></tr> <tr><td>C</td><td>-2.44707</td><td>1.71212</td><td>0.49036</td></tr> <tr><td>C</td><td>-1.87996</td><td>0.52017</td><td>0.80627</td></tr> <tr><td>H</td><td>-3.28584</td><td>2.24391</td><td>0.92187</td></tr> <tr><td>H</td><td>-2.12657</td><td>-0.21056</td><td>1.56632</td></tr> <tr><td>C</td><td>0.05711</td><td>-0.84211</td><td>-0.07599</td></tr> <tr><td>C</td><td>0.70991</td><td>-1.16505</td><td>1.11468</td></tr> <tr><td>C</td><td>0.21663</td><td>-1.60057</td><td>-1.23589</td></tr> <tr><td>C</td><td>1.54520</td><td>-2.28184</td><td>1.13833</td></tr> <tr><td>H</td><td>0.57789</td><td>-0.54619</td><td>2.00340</td></tr> <tr><td>C</td><td>1.06269</td><td>-2.70886</td><td>-1.19772</td></tr> <tr><td>H</td><td>-0.31864</td><td>-1.33987</td><td>-2.14918</td></tr> <tr><td>C</td><td>1.72325</td><td>-3.04960</td><td>-0.01495</td></tr> <tr><td>H</td><td>2.06336</td><td>-2.54597</td><td>2.06030</td></tr> <tr><td>H</td><td>1.19634</td><td>-3.31327</td><td>-2.09502</td></tr> <tr><td>H</td><td>2.37961</td><td>-3.91983</td><td>0.00872</td></tr> <tr><td>H</td><td>-1.93817</td><td>3.08791</td><td>-1.07850</td></tr> <tr><td>H</td><td>0.15955</td><td>2.30308</td><td>-2.32407</td></tr> </tbody> </table>                                                                                                                                                                                                                    | C        | -0.75831 | 1.34675 | -0.92946 | O | 0.14908 | 1.43039 | -1.88634 | N | -1.73718 | 2.21421 | -0.59969 | N | -0.82587 | 0.29917 | -0.08645 | C | -2.44707 | 1.71212 | 0.49036 | C | -1.87996 | 0.52017 | 0.80627 | H | -3.28584 | 2.24391 | 0.92187 | H | -2.12657 | -0.21056 | 1.56632 | C | 0.05711  | -0.84211 | -0.07599 | C | 0.70991  | -1.16505 | 1.11468  | C | 0.21663  | -1.60057 | -1.23589 | C | 1.54520  | -2.28184 | 1.13833  | H | 0.57789 | -0.54619 | 2.00340  | C | 1.06269 | -2.70886 | -1.19772 | H | -0.31864 | -1.33987 | -2.14918 | C | 1.72325 | -3.04960 | -0.01495 | H | 2.06336 | -2.54597 | 2.06030 | H | 1.19634 | -3.31327 | -2.09502 | H | 2.37961  | -3.91983 | 0.00872  | H | -1.93817 | 3.08791  | -1.07850 | H | 0.15955 | 2.30308  | -2.32407 |   |         |          |          |   |         |          |          |   |         |         |          |
| C                                                                                                                                                     | -0.75831                                                                                                                                                                                                                                                                                                                                                                                                                                                                                                                                                                                                                                                                                                                                                                                                                                                                                                                                                                                                                                                                                                                                                                                                                                                                                                                                                                                                                                                                                                                                                                                                                                                                                                                                                                                       | 1.34675  | -0.92946 |         |          |   |         |         |          |   |          |         |          |   |          |         |          |   |          |         |         |   |          |         |         |   |          |         |         |   |          |          |         |   |          |          |          |   |          |          |          |   |          |          |          |   |          |          |          |   |         |          |          |   |         |          |          |   |          |          |          |   |         |          |          |   |         |          |         |   |         |          |          |   |          |          |          |   |          |          |          |   |         |          |          |   |         |          |          |   |         |          |          |   |         |         |          |
| O                                                                                                                                                     | 0.14908                                                                                                                                                                                                                                                                                                                                                                                                                                                                                                                                                                                                                                                                                                                                                                                                                                                                                                                                                                                                                                                                                                                                                                                                                                                                                                                                                                                                                                                                                                                                                                                                                                                                                                                                                                                        | 1.43039  | -1.88634 |         |          |   |         |         |          |   |          |         |          |   |          |         |          |   |          |         |         |   |          |         |         |   |          |         |         |   |          |          |         |   |          |          |          |   |          |          |          |   |          |          |          |   |          |          |          |   |         |          |          |   |         |          |          |   |          |          |          |   |         |          |          |   |         |          |         |   |         |          |          |   |          |          |          |   |          |          |          |   |         |          |          |   |         |          |          |   |         |          |          |   |         |         |          |
| N                                                                                                                                                     | -1.73718                                                                                                                                                                                                                                                                                                                                                                                                                                                                                                                                                                                                                                                                                                                                                                                                                                                                                                                                                                                                                                                                                                                                                                                                                                                                                                                                                                                                                                                                                                                                                                                                                                                                                                                                                                                       | 2.21421  | -0.59969 |         |          |   |         |         |          |   |          |         |          |   |          |         |          |   |          |         |         |   |          |         |         |   |          |         |         |   |          |          |         |   |          |          |          |   |          |          |          |   |          |          |          |   |          |          |          |   |         |          |          |   |         |          |          |   |          |          |          |   |         |          |          |   |         |          |         |   |         |          |          |   |          |          |          |   |          |          |          |   |         |          |          |   |         |          |          |   |         |          |          |   |         |         |          |
| N                                                                                                                                                     | -0.82587                                                                                                                                                                                                                                                                                                                                                                                                                                                                                                                                                                                                                                                                                                                                                                                                                                                                                                                                                                                                                                                                                                                                                                                                                                                                                                                                                                                                                                                                                                                                                                                                                                                                                                                                                                                       | 0.29917  | -0.08645 |         |          |   |         |         |          |   |          |         |          |   |          |         |          |   |          |         |         |   |          |         |         |   |          |         |         |   |          |          |         |   |          |          |          |   |          |          |          |   |          |          |          |   |          |          |          |   |         |          |          |   |         |          |          |   |          |          |          |   |         |          |          |   |         |          |         |   |         |          |          |   |          |          |          |   |          |          |          |   |         |          |          |   |         |          |          |   |         |          |          |   |         |         |          |
| C                                                                                                                                                     | -2.44707                                                                                                                                                                                                                                                                                                                                                                                                                                                                                                                                                                                                                                                                                                                                                                                                                                                                                                                                                                                                                                                                                                                                                                                                                                                                                                                                                                                                                                                                                                                                                                                                                                                                                                                                                                                       | 1.71212  | 0.49036  |         |          |   |         |         |          |   |          |         |          |   |          |         |          |   |          |         |         |   |          |         |         |   |          |         |         |   |          |          |         |   |          |          |          |   |          |          |          |   |          |          |          |   |          |          |          |   |         |          |          |   |         |          |          |   |          |          |          |   |         |          |          |   |         |          |         |   |         |          |          |   |          |          |          |   |          |          |          |   |         |          |          |   |         |          |          |   |         |          |          |   |         |         |          |
| C                                                                                                                                                     | -1.87996                                                                                                                                                                                                                                                                                                                                                                                                                                                                                                                                                                                                                                                                                                                                                                                                                                                                                                                                                                                                                                                                                                                                                                                                                                                                                                                                                                                                                                                                                                                                                                                                                                                                                                                                                                                       | 0.52017  | 0.80627  |         |          |   |         |         |          |   |          |         |          |   |          |         |          |   |          |         |         |   |          |         |         |   |          |         |         |   |          |          |         |   |          |          |          |   |          |          |          |   |          |          |          |   |          |          |          |   |         |          |          |   |         |          |          |   |          |          |          |   |         |          |          |   |         |          |         |   |         |          |          |   |          |          |          |   |          |          |          |   |         |          |          |   |         |          |          |   |         |          |          |   |         |         |          |
| H                                                                                                                                                     | -3.28584                                                                                                                                                                                                                                                                                                                                                                                                                                                                                                                                                                                                                                                                                                                                                                                                                                                                                                                                                                                                                                                                                                                                                                                                                                                                                                                                                                                                                                                                                                                                                                                                                                                                                                                                                                                       | 2.24391  | 0.92187  |         |          |   |         |         |          |   |          |         |          |   |          |         |          |   |          |         |         |   |          |         |         |   |          |         |         |   |          |          |         |   |          |          |          |   |          |          |          |   |          |          |          |   |          |          |          |   |         |          |          |   |         |          |          |   |          |          |          |   |         |          |          |   |         |          |         |   |         |          |          |   |          |          |          |   |          |          |          |   |         |          |          |   |         |          |          |   |         |          |          |   |         |         |          |
| H                                                                                                                                                     | -2.12657                                                                                                                                                                                                                                                                                                                                                                                                                                                                                                                                                                                                                                                                                                                                                                                                                                                                                                                                                                                                                                                                                                                                                                                                                                                                                                                                                                                                                                                                                                                                                                                                                                                                                                                                                                                       | -0.21056 | 1.56632  |         |          |   |         |         |          |   |          |         |          |   |          |         |          |   |          |         |         |   |          |         |         |   |          |         |         |   |          |          |         |   |          |          |          |   |          |          |          |   |          |          |          |   |          |          |          |   |         |          |          |   |         |          |          |   |          |          |          |   |         |          |          |   |         |          |         |   |         |          |          |   |          |          |          |   |          |          |          |   |         |          |          |   |         |          |          |   |         |          |          |   |         |         |          |
| C                                                                                                                                                     | 0.05711                                                                                                                                                                                                                                                                                                                                                                                                                                                                                                                                                                                                                                                                                                                                                                                                                                                                                                                                                                                                                                                                                                                                                                                                                                                                                                                                                                                                                                                                                                                                                                                                                                                                                                                                                                                        | -0.84211 | -0.07599 |         |          |   |         |         |          |   |          |         |          |   |          |         |          |   |          |         |         |   |          |         |         |   |          |         |         |   |          |          |         |   |          |          |          |   |          |          |          |   |          |          |          |   |          |          |          |   |         |          |          |   |         |          |          |   |          |          |          |   |         |          |          |   |         |          |         |   |         |          |          |   |          |          |          |   |          |          |          |   |         |          |          |   |         |          |          |   |         |          |          |   |         |         |          |
| C                                                                                                                                                     | 0.70991                                                                                                                                                                                                                                                                                                                                                                                                                                                                                                                                                                                                                                                                                                                                                                                                                                                                                                                                                                                                                                                                                                                                                                                                                                                                                                                                                                                                                                                                                                                                                                                                                                                                                                                                                                                        | -1.16505 | 1.11468  |         |          |   |         |         |          |   |          |         |          |   |          |         |          |   |          |         |         |   |          |         |         |   |          |         |         |   |          |          |         |   |          |          |          |   |          |          |          |   |          |          |          |   |          |          |          |   |         |          |          |   |         |          |          |   |          |          |          |   |         |          |          |   |         |          |         |   |         |          |          |   |          |          |          |   |          |          |          |   |         |          |          |   |         |          |          |   |         |          |          |   |         |         |          |
| C                                                                                                                                                     | 0.21663                                                                                                                                                                                                                                                                                                                                                                                                                                                                                                                                                                                                                                                                                                                                                                                                                                                                                                                                                                                                                                                                                                                                                                                                                                                                                                                                                                                                                                                                                                                                                                                                                                                                                                                                                                                        | -1.60057 | -1.23589 |         |          |   |         |         |          |   |          |         |          |   |          |         |          |   |          |         |         |   |          |         |         |   |          |         |         |   |          |          |         |   |          |          |          |   |          |          |          |   |          |          |          |   |          |          |          |   |         |          |          |   |         |          |          |   |          |          |          |   |         |          |          |   |         |          |         |   |         |          |          |   |          |          |          |   |          |          |          |   |         |          |          |   |         |          |          |   |         |          |          |   |         |         |          |
| C                                                                                                                                                     | 1.54520                                                                                                                                                                                                                                                                                                                                                                                                                                                                                                                                                                                                                                                                                                                                                                                                                                                                                                                                                                                                                                                                                                                                                                                                                                                                                                                                                                                                                                                                                                                                                                                                                                                                                                                                                                                        | -2.28184 | 1.13833  |         |          |   |         |         |          |   |          |         |          |   |          |         |          |   |          |         |         |   |          |         |         |   |          |         |         |   |          |          |         |   |          |          |          |   |          |          |          |   |          |          |          |   |          |          |          |   |         |          |          |   |         |          |          |   |          |          |          |   |         |          |          |   |         |          |         |   |         |          |          |   |          |          |          |   |          |          |          |   |         |          |          |   |         |          |          |   |         |          |          |   |         |         |          |
| H                                                                                                                                                     | 0.57789                                                                                                                                                                                                                                                                                                                                                                                                                                                                                                                                                                                                                                                                                                                                                                                                                                                                                                                                                                                                                                                                                                                                                                                                                                                                                                                                                                                                                                                                                                                                                                                                                                                                                                                                                                                        | -0.54619 | 2.00340  |         |          |   |         |         |          |   |          |         |          |   |          |         |          |   |          |         |         |   |          |         |         |   |          |         |         |   |          |          |         |   |          |          |          |   |          |          |          |   |          |          |          |   |          |          |          |   |         |          |          |   |         |          |          |   |          |          |          |   |         |          |          |   |         |          |         |   |         |          |          |   |          |          |          |   |          |          |          |   |         |          |          |   |         |          |          |   |         |          |          |   |         |         |          |
| C                                                                                                                                                     | 1.06269                                                                                                                                                                                                                                                                                                                                                                                                                                                                                                                                                                                                                                                                                                                                                                                                                                                                                                                                                                                                                                                                                                                                                                                                                                                                                                                                                                                                                                                                                                                                                                                                                                                                                                                                                                                        | -2.70886 | -1.19772 |         |          |   |         |         |          |   |          |         |          |   |          |         |          |   |          |         |         |   |          |         |         |   |          |         |         |   |          |          |         |   |          |          |          |   |          |          |          |   |          |          |          |   |          |          |          |   |         |          |          |   |         |          |          |   |          |          |          |   |         |          |          |   |         |          |         |   |         |          |          |   |          |          |          |   |          |          |          |   |         |          |          |   |         |          |          |   |         |          |          |   |         |         |          |
| H                                                                                                                                                     | -0.31864                                                                                                                                                                                                                                                                                                                                                                                                                                                                                                                                                                                                                                                                                                                                                                                                                                                                                                                                                                                                                                                                                                                                                                                                                                                                                                                                                                                                                                                                                                                                                                                                                                                                                                                                                                                       | -1.33987 | -2.14918 |         |          |   |         |         |          |   |          |         |          |   |          |         |          |   |          |         |         |   |          |         |         |   |          |         |         |   |          |          |         |   |          |          |          |   |          |          |          |   |          |          |          |   |          |          |          |   |         |          |          |   |         |          |          |   |          |          |          |   |         |          |          |   |         |          |         |   |         |          |          |   |          |          |          |   |          |          |          |   |         |          |          |   |         |          |          |   |         |          |          |   |         |         |          |
| C                                                                                                                                                     | 1.72325                                                                                                                                                                                                                                                                                                                                                                                                                                                                                                                                                                                                                                                                                                                                                                                                                                                                                                                                                                                                                                                                                                                                                                                                                                                                                                                                                                                                                                                                                                                                                                                                                                                                                                                                                                                        | -3.04960 | -0.01495 |         |          |   |         |         |          |   |          |         |          |   |          |         |          |   |          |         |         |   |          |         |         |   |          |         |         |   |          |          |         |   |          |          |          |   |          |          |          |   |          |          |          |   |          |          |          |   |         |          |          |   |         |          |          |   |          |          |          |   |         |          |          |   |         |          |         |   |         |          |          |   |          |          |          |   |          |          |          |   |         |          |          |   |         |          |          |   |         |          |          |   |         |         |          |
| H                                                                                                                                                     | 2.06336                                                                                                                                                                                                                                                                                                                                                                                                                                                                                                                                                                                                                                                                                                                                                                                                                                                                                                                                                                                                                                                                                                                                                                                                                                                                                                                                                                                                                                                                                                                                                                                                                                                                                                                                                                                        | -2.54597 | 2.06030  |         |          |   |         |         |          |   |          |         |          |   |          |         |          |   |          |         |         |   |          |         |         |   |          |         |         |   |          |          |         |   |          |          |          |   |          |          |          |   |          |          |          |   |          |          |          |   |         |          |          |   |         |          |          |   |          |          |          |   |         |          |          |   |         |          |         |   |         |          |          |   |          |          |          |   |          |          |          |   |         |          |          |   |         |          |          |   |         |          |          |   |         |         |          |
| H                                                                                                                                                     | 1.19634                                                                                                                                                                                                                                                                                                                                                                                                                                                                                                                                                                                                                                                                                                                                                                                                                                                                                                                                                                                                                                                                                                                                                                                                                                                                                                                                                                                                                                                                                                                                                                                                                                                                                                                                                                                        | -3.31327 | -2.09502 |         |          |   |         |         |          |   |          |         |          |   |          |         |          |   |          |         |         |   |          |         |         |   |          |         |         |   |          |          |         |   |          |          |          |   |          |          |          |   |          |          |          |   |          |          |          |   |         |          |          |   |         |          |          |   |          |          |          |   |         |          |          |   |         |          |         |   |         |          |          |   |          |          |          |   |          |          |          |   |         |          |          |   |         |          |          |   |         |          |          |   |         |         |          |
| H                                                                                                                                                     | 2.37961                                                                                                                                                                                                                                                                                                                                                                                                                                                                                                                                                                                                                                                                                                                                                                                                                                                                                                                                                                                                                                                                                                                                                                                                                                                                                                                                                                                                                                                                                                                                                                                                                                                                                                                                                                                        | -3.91983 | 0.00872  |         |          |   |         |         |          |   |          |         |          |   |          |         |          |   |          |         |         |   |          |         |         |   |          |         |         |   |          |          |         |   |          |          |          |   |          |          |          |   |          |          |          |   |          |          |          |   |         |          |          |   |         |          |          |   |          |          |          |   |         |          |          |   |         |          |         |   |         |          |          |   |          |          |          |   |          |          |          |   |         |          |          |   |         |          |          |   |         |          |          |   |         |         |          |
| H                                                                                                                                                     | -1.93817                                                                                                                                                                                                                                                                                                                                                                                                                                                                                                                                                                                                                                                                                                                                                                                                                                                                                                                                                                                                                                                                                                                                                                                                                                                                                                                                                                                                                                                                                                                                                                                                                                                                                                                                                                                       | 3.08791  | -1.07850 |         |          |   |         |         |          |   |          |         |          |   |          |         |          |   |          |         |         |   |          |         |         |   |          |         |         |   |          |          |         |   |          |          |          |   |          |          |          |   |          |          |          |   |          |          |          |   |         |          |          |   |         |          |          |   |          |          |          |   |         |          |          |   |         |          |         |   |         |          |          |   |          |          |          |   |          |          |          |   |         |          |          |   |         |          |          |   |         |          |          |   |         |         |          |
| H                                                                                                                                                     | 0.15955                                                                                                                                                                                                                                                                                                                                                                                                                                                                                                                                                                                                                                                                                                                                                                                                                                                                                                                                                                                                                                                                                                                                                                                                                                                                                                                                                                                                                                                                                                                                                                                                                                                                                                                                                                                        | 2.30308  | -2.32407 |         |          |   |         |         |          |   |          |         |          |   |          |         |          |   |          |         |         |   |          |         |         |   |          |         |         |   |          |          |         |   |          |          |          |   |          |          |          |   |          |          |          |   |          |          |          |   |         |          |          |   |         |          |          |   |          |          |          |   |         |          |          |   |         |          |         |   |         |          |          |   |          |          |          |   |          |          |          |   |         |          |          |   |         |          |          |   |         |          |          |   |         |         |          |
| <p>Molecule: <b>1e_OH</b></p>  <p>Energy = -572.035220 Hartree</p> | <p>24</p> <table border="1"> <tbody> <tr><td>C</td><td>-0.78914</td><td>1.31440</td><td>-0.91583</td></tr> <tr><td>O</td><td>0.11273</td><td>1.50012</td><td>-1.86188</td></tr> <tr><td>N</td><td>-1.76228</td><td>2.19706</td><td>-0.63871</td></tr> <tr><td>N</td><td>-0.88548</td><td>0.26987</td><td>-0.06228</td></tr> <tr><td>C</td><td>-2.50455</td><td>1.70160</td><td>0.43445</td></tr> <tr><td>C</td><td>-1.96231</td><td>0.50954</td><td>0.79587</td></tr> <tr><td>H</td><td>-3.35568</td><td>2.24280</td><td>0.82948</td></tr> <tr><td>H</td><td>-2.24245</td><td>-0.20436</td><td>1.56035</td></tr> <tr><td>C</td><td>-1.99665</td><td>3.45800</td><td>-1.34347</td></tr> <tr><td>H</td><td>-1.96024</td><td>4.28755</td><td>-0.62740</td></tr> <tr><td>H</td><td>-1.21582</td><td>3.59336</td><td>-2.09811</td></tr> <tr><td>H</td><td>-2.97809</td><td>3.42927</td><td>-1.83235</td></tr> <tr><td>C</td><td>0.02086</td><td>-0.84527</td><td>-0.04919</td></tr> <tr><td>C</td><td>0.73472</td><td>-1.13287</td><td>1.11610</td></tr> <tr><td>C</td><td>0.17711</td><td>-1.60618</td><td>-1.21327</td></tr> <tr><td>C</td><td>1.62096</td><td>-2.20987</td><td>1.11102</td></tr> <tr><td>H</td><td>0.60400</td><td>-0.51746</td><td>2.00720</td></tr> <tr><td>C</td><td>1.08377</td><td>-2.66895</td><td>-1.20727</td></tr> <tr><td>H</td><td>-0.43405</td><td>-1.40248</td><td>-2.09540</td></tr> <tr><td>C</td><td>1.80111</td><td>-2.97030</td><td>-0.04800</td></tr> <tr><td>H</td><td>2.18114</td><td>-2.44829</td><td>2.01539</td></tr> <tr><td>H</td><td>1.21060</td><td>-3.27320</td><td>-2.10574</td></tr> <tr><td>H</td><td>2.50073</td><td>-3.80643</td><td>-0.04481</td></tr> <tr><td>H</td><td>0.73303</td><td>0.73712</td><td>-1.88514</td></tr> </tbody> </table> | C        | -0.78914 | 1.31440 | -0.91583 | O | 0.11273 | 1.50012 | -1.86188 | N | -1.76228 | 2.19706 | -0.63871 | N | -0.88548 | 0.26987 | -0.06228 | C | -2.50455 | 1.70160 | 0.43445 | C | -1.96231 | 0.50954 | 0.79587 | H | -3.35568 | 2.24280 | 0.82948 | H | -2.24245 | -0.20436 | 1.56035 | C | -1.99665 | 3.45800  | -1.34347 | H | -1.96024 | 4.28755  | -0.62740 | H | -1.21582 | 3.59336  | -2.09811 | H | -2.97809 | 3.42927  | -1.83235 | C | 0.02086 | -0.84527 | -0.04919 | C | 0.73472 | -1.13287 | 1.11610  | C | 0.17711  | -1.60618 | -1.21327 | C | 1.62096 | -2.20987 | 1.11102  | H | 0.60400 | -0.51746 | 2.00720 | C | 1.08377 | -2.66895 | -1.20727 | H | -0.43405 | -1.40248 | -2.09540 | C | 1.80111  | -2.97030 | -0.04800 | H | 2.18114 | -2.44829 | 2.01539  | H | 1.21060 | -3.27320 | -2.10574 | H | 2.50073 | -3.80643 | -0.04481 | H | 0.73303 | 0.73712 | -1.88514 |
| C                                                                                                                                                     | -0.78914                                                                                                                                                                                                                                                                                                                                                                                                                                                                                                                                                                                                                                                                                                                                                                                                                                                                                                                                                                                                                                                                                                                                                                                                                                                                                                                                                                                                                                                                                                                                                                                                                                                                                                                                                                                       | 1.31440  | -0.91583 |         |          |   |         |         |          |   |          |         |          |   |          |         |          |   |          |         |         |   |          |         |         |   |          |         |         |   |          |          |         |   |          |          |          |   |          |          |          |   |          |          |          |   |          |          |          |   |         |          |          |   |         |          |          |   |          |          |          |   |         |          |          |   |         |          |         |   |         |          |          |   |          |          |          |   |          |          |          |   |         |          |          |   |         |          |          |   |         |          |          |   |         |         |          |
| O                                                                                                                                                     | 0.11273                                                                                                                                                                                                                                                                                                                                                                                                                                                                                                                                                                                                                                                                                                                                                                                                                                                                                                                                                                                                                                                                                                                                                                                                                                                                                                                                                                                                                                                                                                                                                                                                                                                                                                                                                                                        | 1.50012  | -1.86188 |         |          |   |         |         |          |   |          |         |          |   |          |         |          |   |          |         |         |   |          |         |         |   |          |         |         |   |          |          |         |   |          |          |          |   |          |          |          |   |          |          |          |   |          |          |          |   |         |          |          |   |         |          |          |   |          |          |          |   |         |          |          |   |         |          |         |   |         |          |          |   |          |          |          |   |          |          |          |   |         |          |          |   |         |          |          |   |         |          |          |   |         |         |          |
| N                                                                                                                                                     | -1.76228                                                                                                                                                                                                                                                                                                                                                                                                                                                                                                                                                                                                                                                                                                                                                                                                                                                                                                                                                                                                                                                                                                                                                                                                                                                                                                                                                                                                                                                                                                                                                                                                                                                                                                                                                                                       | 2.19706  | -0.63871 |         |          |   |         |         |          |   |          |         |          |   |          |         |          |   |          |         |         |   |          |         |         |   |          |         |         |   |          |          |         |   |          |          |          |   |          |          |          |   |          |          |          |   |          |          |          |   |         |          |          |   |         |          |          |   |          |          |          |   |         |          |          |   |         |          |         |   |         |          |          |   |          |          |          |   |          |          |          |   |         |          |          |   |         |          |          |   |         |          |          |   |         |         |          |
| N                                                                                                                                                     | -0.88548                                                                                                                                                                                                                                                                                                                                                                                                                                                                                                                                                                                                                                                                                                                                                                                                                                                                                                                                                                                                                                                                                                                                                                                                                                                                                                                                                                                                                                                                                                                                                                                                                                                                                                                                                                                       | 0.26987  | -0.06228 |         |          |   |         |         |          |   |          |         |          |   |          |         |          |   |          |         |         |   |          |         |         |   |          |         |         |   |          |          |         |   |          |          |          |   |          |          |          |   |          |          |          |   |          |          |          |   |         |          |          |   |         |          |          |   |          |          |          |   |         |          |          |   |         |          |         |   |         |          |          |   |          |          |          |   |          |          |          |   |         |          |          |   |         |          |          |   |         |          |          |   |         |         |          |
| C                                                                                                                                                     | -2.50455                                                                                                                                                                                                                                                                                                                                                                                                                                                                                                                                                                                                                                                                                                                                                                                                                                                                                                                                                                                                                                                                                                                                                                                                                                                                                                                                                                                                                                                                                                                                                                                                                                                                                                                                                                                       | 1.70160  | 0.43445  |         |          |   |         |         |          |   |          |         |          |   |          |         |          |   |          |         |         |   |          |         |         |   |          |         |         |   |          |          |         |   |          |          |          |   |          |          |          |   |          |          |          |   |          |          |          |   |         |          |          |   |         |          |          |   |          |          |          |   |         |          |          |   |         |          |         |   |         |          |          |   |          |          |          |   |          |          |          |   |         |          |          |   |         |          |          |   |         |          |          |   |         |         |          |
| C                                                                                                                                                     | -1.96231                                                                                                                                                                                                                                                                                                                                                                                                                                                                                                                                                                                                                                                                                                                                                                                                                                                                                                                                                                                                                                                                                                                                                                                                                                                                                                                                                                                                                                                                                                                                                                                                                                                                                                                                                                                       | 0.50954  | 0.79587  |         |          |   |         |         |          |   |          |         |          |   |          |         |          |   |          |         |         |   |          |         |         |   |          |         |         |   |          |          |         |   |          |          |          |   |          |          |          |   |          |          |          |   |          |          |          |   |         |          |          |   |         |          |          |   |          |          |          |   |         |          |          |   |         |          |         |   |         |          |          |   |          |          |          |   |          |          |          |   |         |          |          |   |         |          |          |   |         |          |          |   |         |         |          |
| H                                                                                                                                                     | -3.35568                                                                                                                                                                                                                                                                                                                                                                                                                                                                                                                                                                                                                                                                                                                                                                                                                                                                                                                                                                                                                                                                                                                                                                                                                                                                                                                                                                                                                                                                                                                                                                                                                                                                                                                                                                                       | 2.24280  | 0.82948  |         |          |   |         |         |          |   |          |         |          |   |          |         |          |   |          |         |         |   |          |         |         |   |          |         |         |   |          |          |         |   |          |          |          |   |          |          |          |   |          |          |          |   |          |          |          |   |         |          |          |   |         |          |          |   |          |          |          |   |         |          |          |   |         |          |         |   |         |          |          |   |          |          |          |   |          |          |          |   |         |          |          |   |         |          |          |   |         |          |          |   |         |         |          |
| H                                                                                                                                                     | -2.24245                                                                                                                                                                                                                                                                                                                                                                                                                                                                                                                                                                                                                                                                                                                                                                                                                                                                                                                                                                                                                                                                                                                                                                                                                                                                                                                                                                                                                                                                                                                                                                                                                                                                                                                                                                                       | -0.20436 | 1.56035  |         |          |   |         |         |          |   |          |         |          |   |          |         |          |   |          |         |         |   |          |         |         |   |          |         |         |   |          |          |         |   |          |          |          |   |          |          |          |   |          |          |          |   |          |          |          |   |         |          |          |   |         |          |          |   |          |          |          |   |         |          |          |   |         |          |         |   |         |          |          |   |          |          |          |   |          |          |          |   |         |          |          |   |         |          |          |   |         |          |          |   |         |         |          |
| C                                                                                                                                                     | -1.99665                                                                                                                                                                                                                                                                                                                                                                                                                                                                                                                                                                                                                                                                                                                                                                                                                                                                                                                                                                                                                                                                                                                                                                                                                                                                                                                                                                                                                                                                                                                                                                                                                                                                                                                                                                                       | 3.45800  | -1.34347 |         |          |   |         |         |          |   |          |         |          |   |          |         |          |   |          |         |         |   |          |         |         |   |          |         |         |   |          |          |         |   |          |          |          |   |          |          |          |   |          |          |          |   |          |          |          |   |         |          |          |   |         |          |          |   |          |          |          |   |         |          |          |   |         |          |         |   |         |          |          |   |          |          |          |   |          |          |          |   |         |          |          |   |         |          |          |   |         |          |          |   |         |         |          |
| H                                                                                                                                                     | -1.96024                                                                                                                                                                                                                                                                                                                                                                                                                                                                                                                                                                                                                                                                                                                                                                                                                                                                                                                                                                                                                                                                                                                                                                                                                                                                                                                                                                                                                                                                                                                                                                                                                                                                                                                                                                                       | 4.28755  | -0.62740 |         |          |   |         |         |          |   |          |         |          |   |          |         |          |   |          |         |         |   |          |         |         |   |          |         |         |   |          |          |         |   |          |          |          |   |          |          |          |   |          |          |          |   |          |          |          |   |         |          |          |   |         |          |          |   |          |          |          |   |         |          |          |   |         |          |         |   |         |          |          |   |          |          |          |   |          |          |          |   |         |          |          |   |         |          |          |   |         |          |          |   |         |         |          |
| H                                                                                                                                                     | -1.21582                                                                                                                                                                                                                                                                                                                                                                                                                                                                                                                                                                                                                                                                                                                                                                                                                                                                                                                                                                                                                                                                                                                                                                                                                                                                                                                                                                                                                                                                                                                                                                                                                                                                                                                                                                                       | 3.59336  | -2.09811 |         |          |   |         |         |          |   |          |         |          |   |          |         |          |   |          |         |         |   |          |         |         |   |          |         |         |   |          |          |         |   |          |          |          |   |          |          |          |   |          |          |          |   |          |          |          |   |         |          |          |   |         |          |          |   |          |          |          |   |         |          |          |   |         |          |         |   |         |          |          |   |          |          |          |   |          |          |          |   |         |          |          |   |         |          |          |   |         |          |          |   |         |         |          |
| H                                                                                                                                                     | -2.97809                                                                                                                                                                                                                                                                                                                                                                                                                                                                                                                                                                                                                                                                                                                                                                                                                                                                                                                                                                                                                                                                                                                                                                                                                                                                                                                                                                                                                                                                                                                                                                                                                                                                                                                                                                                       | 3.42927  | -1.83235 |         |          |   |         |         |          |   |          |         |          |   |          |         |          |   |          |         |         |   |          |         |         |   |          |         |         |   |          |          |         |   |          |          |          |   |          |          |          |   |          |          |          |   |          |          |          |   |         |          |          |   |         |          |          |   |          |          |          |   |         |          |          |   |         |          |         |   |         |          |          |   |          |          |          |   |          |          |          |   |         |          |          |   |         |          |          |   |         |          |          |   |         |         |          |
| C                                                                                                                                                     | 0.02086                                                                                                                                                                                                                                                                                                                                                                                                                                                                                                                                                                                                                                                                                                                                                                                                                                                                                                                                                                                                                                                                                                                                                                                                                                                                                                                                                                                                                                                                                                                                                                                                                                                                                                                                                                                        | -0.84527 | -0.04919 |         |          |   |         |         |          |   |          |         |          |   |          |         |          |   |          |         |         |   |          |         |         |   |          |         |         |   |          |          |         |   |          |          |          |   |          |          |          |   |          |          |          |   |          |          |          |   |         |          |          |   |         |          |          |   |          |          |          |   |         |          |          |   |         |          |         |   |         |          |          |   |          |          |          |   |          |          |          |   |         |          |          |   |         |          |          |   |         |          |          |   |         |         |          |
| C                                                                                                                                                     | 0.73472                                                                                                                                                                                                                                                                                                                                                                                                                                                                                                                                                                                                                                                                                                                                                                                                                                                                                                                                                                                                                                                                                                                                                                                                                                                                                                                                                                                                                                                                                                                                                                                                                                                                                                                                                                                        | -1.13287 | 1.11610  |         |          |   |         |         |          |   |          |         |          |   |          |         |          |   |          |         |         |   |          |         |         |   |          |         |         |   |          |          |         |   |          |          |          |   |          |          |          |   |          |          |          |   |          |          |          |   |         |          |          |   |         |          |          |   |          |          |          |   |         |          |          |   |         |          |         |   |         |          |          |   |          |          |          |   |          |          |          |   |         |          |          |   |         |          |          |   |         |          |          |   |         |         |          |
| C                                                                                                                                                     | 0.17711                                                                                                                                                                                                                                                                                                                                                                                                                                                                                                                                                                                                                                                                                                                                                                                                                                                                                                                                                                                                                                                                                                                                                                                                                                                                                                                                                                                                                                                                                                                                                                                                                                                                                                                                                                                        | -1.60618 | -1.21327 |         |          |   |         |         |          |   |          |         |          |   |          |         |          |   |          |         |         |   |          |         |         |   |          |         |         |   |          |          |         |   |          |          |          |   |          |          |          |   |          |          |          |   |          |          |          |   |         |          |          |   |         |          |          |   |          |          |          |   |         |          |          |   |         |          |         |   |         |          |          |   |          |          |          |   |          |          |          |   |         |          |          |   |         |          |          |   |         |          |          |   |         |         |          |
| C                                                                                                                                                     | 1.62096                                                                                                                                                                                                                                                                                                                                                                                                                                                                                                                                                                                                                                                                                                                                                                                                                                                                                                                                                                                                                                                                                                                                                                                                                                                                                                                                                                                                                                                                                                                                                                                                                                                                                                                                                                                        | -2.20987 | 1.11102  |         |          |   |         |         |          |   |          |         |          |   |          |         |          |   |          |         |         |   |          |         |         |   |          |         |         |   |          |          |         |   |          |          |          |   |          |          |          |   |          |          |          |   |          |          |          |   |         |          |          |   |         |          |          |   |          |          |          |   |         |          |          |   |         |          |         |   |         |          |          |   |          |          |          |   |          |          |          |   |         |          |          |   |         |          |          |   |         |          |          |   |         |         |          |
| H                                                                                                                                                     | 0.60400                                                                                                                                                                                                                                                                                                                                                                                                                                                                                                                                                                                                                                                                                                                                                                                                                                                                                                                                                                                                                                                                                                                                                                                                                                                                                                                                                                                                                                                                                                                                                                                                                                                                                                                                                                                        | -0.51746 | 2.00720  |         |          |   |         |         |          |   |          |         |          |   |          |         |          |   |          |         |         |   |          |         |         |   |          |         |         |   |          |          |         |   |          |          |          |   |          |          |          |   |          |          |          |   |          |          |          |   |         |          |          |   |         |          |          |   |          |          |          |   |         |          |          |   |         |          |         |   |         |          |          |   |          |          |          |   |          |          |          |   |         |          |          |   |         |          |          |   |         |          |          |   |         |         |          |
| C                                                                                                                                                     | 1.08377                                                                                                                                                                                                                                                                                                                                                                                                                                                                                                                                                                                                                                                                                                                                                                                                                                                                                                                                                                                                                                                                                                                                                                                                                                                                                                                                                                                                                                                                                                                                                                                                                                                                                                                                                                                        | -2.66895 | -1.20727 |         |          |   |         |         |          |   |          |         |          |   |          |         |          |   |          |         |         |   |          |         |         |   |          |         |         |   |          |          |         |   |          |          |          |   |          |          |          |   |          |          |          |   |          |          |          |   |         |          |          |   |         |          |          |   |          |          |          |   |         |          |          |   |         |          |         |   |         |          |          |   |          |          |          |   |          |          |          |   |         |          |          |   |         |          |          |   |         |          |          |   |         |         |          |
| H                                                                                                                                                     | -0.43405                                                                                                                                                                                                                                                                                                                                                                                                                                                                                                                                                                                                                                                                                                                                                                                                                                                                                                                                                                                                                                                                                                                                                                                                                                                                                                                                                                                                                                                                                                                                                                                                                                                                                                                                                                                       | -1.40248 | -2.09540 |         |          |   |         |         |          |   |          |         |          |   |          |         |          |   |          |         |         |   |          |         |         |   |          |         |         |   |          |          |         |   |          |          |          |   |          |          |          |   |          |          |          |   |          |          |          |   |         |          |          |   |         |          |          |   |          |          |          |   |         |          |          |   |         |          |         |   |         |          |          |   |          |          |          |   |          |          |          |   |         |          |          |   |         |          |          |   |         |          |          |   |         |         |          |
| C                                                                                                                                                     | 1.80111                                                                                                                                                                                                                                                                                                                                                                                                                                                                                                                                                                                                                                                                                                                                                                                                                                                                                                                                                                                                                                                                                                                                                                                                                                                                                                                                                                                                                                                                                                                                                                                                                                                                                                                                                                                        | -2.97030 | -0.04800 |         |          |   |         |         |          |   |          |         |          |   |          |         |          |   |          |         |         |   |          |         |         |   |          |         |         |   |          |          |         |   |          |          |          |   |          |          |          |   |          |          |          |   |          |          |          |   |         |          |          |   |         |          |          |   |          |          |          |   |         |          |          |   |         |          |         |   |         |          |          |   |          |          |          |   |          |          |          |   |         |          |          |   |         |          |          |   |         |          |          |   |         |         |          |
| H                                                                                                                                                     | 2.18114                                                                                                                                                                                                                                                                                                                                                                                                                                                                                                                                                                                                                                                                                                                                                                                                                                                                                                                                                                                                                                                                                                                                                                                                                                                                                                                                                                                                                                                                                                                                                                                                                                                                                                                                                                                        | -2.44829 | 2.01539  |         |          |   |         |         |          |   |          |         |          |   |          |         |          |   |          |         |         |   |          |         |         |   |          |         |         |   |          |          |         |   |          |          |          |   |          |          |          |   |          |          |          |   |          |          |          |   |         |          |          |   |         |          |          |   |          |          |          |   |         |          |          |   |         |          |         |   |         |          |          |   |          |          |          |   |          |          |          |   |         |          |          |   |         |          |          |   |         |          |          |   |         |         |          |
| H                                                                                                                                                     | 1.21060                                                                                                                                                                                                                                                                                                                                                                                                                                                                                                                                                                                                                                                                                                                                                                                                                                                                                                                                                                                                                                                                                                                                                                                                                                                                                                                                                                                                                                                                                                                                                                                                                                                                                                                                                                                        | -3.27320 | -2.10574 |         |          |   |         |         |          |   |          |         |          |   |          |         |          |   |          |         |         |   |          |         |         |   |          |         |         |   |          |          |         |   |          |          |          |   |          |          |          |   |          |          |          |   |          |          |          |   |         |          |          |   |         |          |          |   |          |          |          |   |         |          |          |   |         |          |         |   |         |          |          |   |          |          |          |   |          |          |          |   |         |          |          |   |         |          |          |   |         |          |          |   |         |         |          |
| H                                                                                                                                                     | 2.50073                                                                                                                                                                                                                                                                                                                                                                                                                                                                                                                                                                                                                                                                                                                                                                                                                                                                                                                                                                                                                                                                                                                                                                                                                                                                                                                                                                                                                                                                                                                                                                                                                                                                                                                                                                                        | -3.80643 | -0.04481 |         |          |   |         |         |          |   |          |         |          |   |          |         |          |   |          |         |         |   |          |         |         |   |          |         |         |   |          |          |         |   |          |          |          |   |          |          |          |   |          |          |          |   |          |          |          |   |         |          |          |   |         |          |          |   |          |          |          |   |         |          |          |   |         |          |         |   |         |          |          |   |          |          |          |   |          |          |          |   |         |          |          |   |         |          |          |   |         |          |          |   |         |         |          |
| H                                                                                                                                                     | 0.73303                                                                                                                                                                                                                                                                                                                                                                                                                                                                                                                                                                                                                                                                                                                                                                                                                                                                                                                                                                                                                                                                                                                                                                                                                                                                                                                                                                                                                                                                                                                                                                                                                                                                                                                                                                                        | 0.73712  | -1.88514 |         |          |   |         |         |          |   |          |         |          |   |          |         |          |   |          |         |         |   |          |         |         |   |          |         |         |   |          |          |         |   |          |          |          |   |          |          |          |   |          |          |          |   |          |          |          |   |         |          |          |   |         |          |          |   |          |          |          |   |         |          |          |   |         |          |         |   |         |          |          |   |          |          |          |   |          |          |          |   |         |          |          |   |         |          |          |   |         |          |          |   |         |         |          |
| <p><b>TRANSITION STATE CALCULATIONS, <math>\omega</math>B97X-V/def2-TZVPD, PCM(chloroform)</b></p>                                                    |                                                                                                                                                                                                                                                                                                                                                                                                                                                                                                                                                                                                                                                                                                                                                                                                                                                                                                                                                                                                                                                                                                                                                                                                                                                                                                                                                                                                                                                                                                                                                                                                                                                                                                                                                                                                |          |          |         |          |   |         |         |          |   |          |         |          |   |          |         |          |   |          |         |         |   |          |         |         |   |          |         |         |   |          |          |         |   |          |          |          |   |          |          |          |   |          |          |          |   |          |          |          |   |         |          |          |   |         |          |          |   |          |          |          |   |         |          |          |   |         |          |         |   |         |          |          |   |          |          |          |   |          |          |          |   |         |          |          |   |         |          |          |   |         |          |          |   |         |         |          |



|                                                                                                                                                                                                                                                                       |                                                                                                                                                                                                                                                                                                                                                                                                                                                                                                                                                                                                                                                                                                                                                                                                                                                                                                                                                                                                                                                                                                                                                                                                                                                                                                                                                                                                                                                                                                                                                                                                                                                                                                                                                                                                                                                                                                                                                                                                                                                                                                                                                                                                                                                                                                                                                                                                                                                                                                                                                                                                                                                                                                                                                                                                                                                                                                                                              |          |          |         |          |   |         |         |          |   |         |          |          |   |         |         |          |   |          |         |          |   |         |         |          |   |         |          |          |   |         |         |          |   |         |         |          |   |          |          |         |   |         |         |         |   |         |         |         |   |         |         |         |   |         |         |         |   |         |         |         |   |         |         |         |   |         |         |         |   |         |         |         |   |         |          |         |   |         |          |         |   |         |         |         |   |          |         |         |   |          |         |         |   |         |         |         |   |         |         |         |   |          |         |         |   |         |         |         |   |         |          |         |   |         |         |         |   |          |         |         |   |         |         |         |   |         |         |         |   |         |         |         |   |         |         |         |   |         |          |         |   |         |          |         |   |         |          |         |   |         |          |         |   |          |          |          |   |         |         |          |
|-----------------------------------------------------------------------------------------------------------------------------------------------------------------------------------------------------------------------------------------------------------------------|----------------------------------------------------------------------------------------------------------------------------------------------------------------------------------------------------------------------------------------------------------------------------------------------------------------------------------------------------------------------------------------------------------------------------------------------------------------------------------------------------------------------------------------------------------------------------------------------------------------------------------------------------------------------------------------------------------------------------------------------------------------------------------------------------------------------------------------------------------------------------------------------------------------------------------------------------------------------------------------------------------------------------------------------------------------------------------------------------------------------------------------------------------------------------------------------------------------------------------------------------------------------------------------------------------------------------------------------------------------------------------------------------------------------------------------------------------------------------------------------------------------------------------------------------------------------------------------------------------------------------------------------------------------------------------------------------------------------------------------------------------------------------------------------------------------------------------------------------------------------------------------------------------------------------------------------------------------------------------------------------------------------------------------------------------------------------------------------------------------------------------------------------------------------------------------------------------------------------------------------------------------------------------------------------------------------------------------------------------------------------------------------------------------------------------------------------------------------------------------------------------------------------------------------------------------------------------------------------------------------------------------------------------------------------------------------------------------------------------------------------------------------------------------------------------------------------------------------------------------------------------------------------------------------------------------------|----------|----------|---------|----------|---|---------|---------|----------|---|---------|----------|----------|---|---------|---------|----------|---|----------|---------|----------|---|---------|---------|----------|---|---------|----------|----------|---|---------|---------|----------|---|---------|---------|----------|---|----------|----------|---------|---|---------|---------|---------|---|---------|---------|---------|---|---------|---------|---------|---|---------|---------|---------|---|---------|---------|---------|---|---------|---------|---------|---|---------|---------|---------|---|---------|---------|---------|---|---------|----------|---------|---|---------|----------|---------|---|---------|---------|---------|---|----------|---------|---------|---|----------|---------|---------|---|---------|---------|---------|---|---------|---------|---------|---|----------|---------|---------|---|---------|---------|---------|---|---------|----------|---------|---|---------|---------|---------|---|----------|---------|---------|---|---------|---------|---------|---|---------|---------|---------|---|---------|---------|---------|---|---------|---------|---------|---|---------|----------|---------|---|---------|----------|---------|---|---------|----------|---------|---|---------|----------|---------|---|----------|----------|----------|---|---------|---------|----------|
| <p style="text-align: center;">Molecule: <b>1a</b></p> 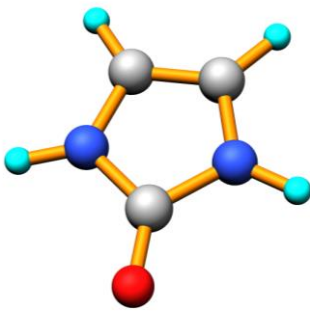 <p style="text-align: center;">Energy = -301.620280 Hartree</p>                                                              | <p style="text-align: center;">10</p> <table border="1"> <tbody> <tr><td>C</td><td>-0.30608</td><td>1.35031</td><td>-0.32001</td></tr> <tr><td>C</td><td>0.67121</td><td>1.48323</td><td>-1.24115</td></tr> <tr><td>C</td><td>1.24414</td><td>-0.29437</td><td>0.09872</td></tr> <tr><td>N</td><td>0.03615</td><td>0.27325</td><td>0.49313</td></tr> <tr><td>H</td><td>-1.20718</td><td>1.92453</td><td>-0.17658</td></tr> <tr><td>N</td><td>1.61451</td><td>0.49064</td><td>-0.98911</td></tr> <tr><td>O</td><td>1.83271</td><td>-1.24585</td><td>0.58636</td></tr> <tr><td>H</td><td>0.77569</td><td>2.19485</td><td>-2.04425</td></tr> <tr><td>H</td><td>2.45600</td><td>0.31358</td><td>-1.50877</td></tr> <tr><td>H</td><td>-0.48313</td><td>-0.07718</td><td>1.27867</td></tr> </tbody> </table>                                                                                                                                                                                                                                                                                                                                                                                                                                                                                                                                                                                                                                                                                                                                                                                                                                                                                                                                                                                                                                                                                                                                                                                                                                                                                                                                                                                                                                                                                                                                                                                                                                                                                                                                                                                                                                                                                                                                                                                                                                                                                                                                       | C        | -0.30608 | 1.35031 | -0.32001 | C | 0.67121 | 1.48323 | -1.24115 | C | 1.24414 | -0.29437 | 0.09872  | N | 0.03615 | 0.27325 | 0.49313  | H | -1.20718 | 1.92453 | -0.17658 | N | 1.61451 | 0.49064 | -0.98911 | O | 1.83271 | -1.24585 | 0.58636  | H | 0.77569 | 2.19485 | -2.04425 | H | 2.45600 | 0.31358 | -1.50877 | H | -0.48313 | -0.07718 | 1.27867 |   |         |         |         |   |         |         |         |   |         |         |         |   |         |         |         |   |         |         |         |   |         |         |         |   |         |         |         |   |         |         |         |   |         |          |         |   |         |          |         |   |         |         |         |   |          |         |         |   |          |         |         |   |         |         |         |   |         |         |         |   |          |         |         |   |         |         |         |   |         |          |         |   |         |         |         |   |          |         |         |   |         |         |         |   |         |         |         |   |         |         |         |   |         |         |         |   |         |          |         |   |         |          |         |   |         |          |         |   |         |          |         |   |          |          |          |   |         |         |          |
| C                                                                                                                                                                                                                                                                     | -0.30608                                                                                                                                                                                                                                                                                                                                                                                                                                                                                                                                                                                                                                                                                                                                                                                                                                                                                                                                                                                                                                                                                                                                                                                                                                                                                                                                                                                                                                                                                                                                                                                                                                                                                                                                                                                                                                                                                                                                                                                                                                                                                                                                                                                                                                                                                                                                                                                                                                                                                                                                                                                                                                                                                                                                                                                                                                                                                                                                     | 1.35031  | -0.32001 |         |          |   |         |         |          |   |         |          |          |   |         |         |          |   |          |         |          |   |         |         |          |   |         |          |          |   |         |         |          |   |         |         |          |   |          |          |         |   |         |         |         |   |         |         |         |   |         |         |         |   |         |         |         |   |         |         |         |   |         |         |         |   |         |         |         |   |         |         |         |   |         |          |         |   |         |          |         |   |         |         |         |   |          |         |         |   |          |         |         |   |         |         |         |   |         |         |         |   |          |         |         |   |         |         |         |   |         |          |         |   |         |         |         |   |          |         |         |   |         |         |         |   |         |         |         |   |         |         |         |   |         |         |         |   |         |          |         |   |         |          |         |   |         |          |         |   |         |          |         |   |          |          |          |   |         |         |          |
| C                                                                                                                                                                                                                                                                     | 0.67121                                                                                                                                                                                                                                                                                                                                                                                                                                                                                                                                                                                                                                                                                                                                                                                                                                                                                                                                                                                                                                                                                                                                                                                                                                                                                                                                                                                                                                                                                                                                                                                                                                                                                                                                                                                                                                                                                                                                                                                                                                                                                                                                                                                                                                                                                                                                                                                                                                                                                                                                                                                                                                                                                                                                                                                                                                                                                                                                      | 1.48323  | -1.24115 |         |          |   |         |         |          |   |         |          |          |   |         |         |          |   |          |         |          |   |         |         |          |   |         |          |          |   |         |         |          |   |         |         |          |   |          |          |         |   |         |         |         |   |         |         |         |   |         |         |         |   |         |         |         |   |         |         |         |   |         |         |         |   |         |         |         |   |         |         |         |   |         |          |         |   |         |          |         |   |         |         |         |   |          |         |         |   |          |         |         |   |         |         |         |   |         |         |         |   |          |         |         |   |         |         |         |   |         |          |         |   |         |         |         |   |          |         |         |   |         |         |         |   |         |         |         |   |         |         |         |   |         |         |         |   |         |          |         |   |         |          |         |   |         |          |         |   |         |          |         |   |          |          |          |   |         |         |          |
| C                                                                                                                                                                                                                                                                     | 1.24414                                                                                                                                                                                                                                                                                                                                                                                                                                                                                                                                                                                                                                                                                                                                                                                                                                                                                                                                                                                                                                                                                                                                                                                                                                                                                                                                                                                                                                                                                                                                                                                                                                                                                                                                                                                                                                                                                                                                                                                                                                                                                                                                                                                                                                                                                                                                                                                                                                                                                                                                                                                                                                                                                                                                                                                                                                                                                                                                      | -0.29437 | 0.09872  |         |          |   |         |         |          |   |         |          |          |   |         |         |          |   |          |         |          |   |         |         |          |   |         |          |          |   |         |         |          |   |         |         |          |   |          |          |         |   |         |         |         |   |         |         |         |   |         |         |         |   |         |         |         |   |         |         |         |   |         |         |         |   |         |         |         |   |         |         |         |   |         |          |         |   |         |          |         |   |         |         |         |   |          |         |         |   |          |         |         |   |         |         |         |   |         |         |         |   |          |         |         |   |         |         |         |   |         |          |         |   |         |         |         |   |          |         |         |   |         |         |         |   |         |         |         |   |         |         |         |   |         |         |         |   |         |          |         |   |         |          |         |   |         |          |         |   |         |          |         |   |          |          |          |   |         |         |          |
| N                                                                                                                                                                                                                                                                     | 0.03615                                                                                                                                                                                                                                                                                                                                                                                                                                                                                                                                                                                                                                                                                                                                                                                                                                                                                                                                                                                                                                                                                                                                                                                                                                                                                                                                                                                                                                                                                                                                                                                                                                                                                                                                                                                                                                                                                                                                                                                                                                                                                                                                                                                                                                                                                                                                                                                                                                                                                                                                                                                                                                                                                                                                                                                                                                                                                                                                      | 0.27325  | 0.49313  |         |          |   |         |         |          |   |         |          |          |   |         |         |          |   |          |         |          |   |         |         |          |   |         |          |          |   |         |         |          |   |         |         |          |   |          |          |         |   |         |         |         |   |         |         |         |   |         |         |         |   |         |         |         |   |         |         |         |   |         |         |         |   |         |         |         |   |         |         |         |   |         |          |         |   |         |          |         |   |         |         |         |   |          |         |         |   |          |         |         |   |         |         |         |   |         |         |         |   |          |         |         |   |         |         |         |   |         |          |         |   |         |         |         |   |          |         |         |   |         |         |         |   |         |         |         |   |         |         |         |   |         |         |         |   |         |          |         |   |         |          |         |   |         |          |         |   |         |          |         |   |          |          |          |   |         |         |          |
| H                                                                                                                                                                                                                                                                     | -1.20718                                                                                                                                                                                                                                                                                                                                                                                                                                                                                                                                                                                                                                                                                                                                                                                                                                                                                                                                                                                                                                                                                                                                                                                                                                                                                                                                                                                                                                                                                                                                                                                                                                                                                                                                                                                                                                                                                                                                                                                                                                                                                                                                                                                                                                                                                                                                                                                                                                                                                                                                                                                                                                                                                                                                                                                                                                                                                                                                     | 1.92453  | -0.17658 |         |          |   |         |         |          |   |         |          |          |   |         |         |          |   |          |         |          |   |         |         |          |   |         |          |          |   |         |         |          |   |         |         |          |   |          |          |         |   |         |         |         |   |         |         |         |   |         |         |         |   |         |         |         |   |         |         |         |   |         |         |         |   |         |         |         |   |         |         |         |   |         |          |         |   |         |          |         |   |         |         |         |   |          |         |         |   |          |         |         |   |         |         |         |   |         |         |         |   |          |         |         |   |         |         |         |   |         |          |         |   |         |         |         |   |          |         |         |   |         |         |         |   |         |         |         |   |         |         |         |   |         |         |         |   |         |          |         |   |         |          |         |   |         |          |         |   |         |          |         |   |          |          |          |   |         |         |          |
| N                                                                                                                                                                                                                                                                     | 1.61451                                                                                                                                                                                                                                                                                                                                                                                                                                                                                                                                                                                                                                                                                                                                                                                                                                                                                                                                                                                                                                                                                                                                                                                                                                                                                                                                                                                                                                                                                                                                                                                                                                                                                                                                                                                                                                                                                                                                                                                                                                                                                                                                                                                                                                                                                                                                                                                                                                                                                                                                                                                                                                                                                                                                                                                                                                                                                                                                      | 0.49064  | -0.98911 |         |          |   |         |         |          |   |         |          |          |   |         |         |          |   |          |         |          |   |         |         |          |   |         |          |          |   |         |         |          |   |         |         |          |   |          |          |         |   |         |         |         |   |         |         |         |   |         |         |         |   |         |         |         |   |         |         |         |   |         |         |         |   |         |         |         |   |         |         |         |   |         |          |         |   |         |          |         |   |         |         |         |   |          |         |         |   |          |         |         |   |         |         |         |   |         |         |         |   |          |         |         |   |         |         |         |   |         |          |         |   |         |         |         |   |          |         |         |   |         |         |         |   |         |         |         |   |         |         |         |   |         |         |         |   |         |          |         |   |         |          |         |   |         |          |         |   |         |          |         |   |          |          |          |   |         |         |          |
| O                                                                                                                                                                                                                                                                     | 1.83271                                                                                                                                                                                                                                                                                                                                                                                                                                                                                                                                                                                                                                                                                                                                                                                                                                                                                                                                                                                                                                                                                                                                                                                                                                                                                                                                                                                                                                                                                                                                                                                                                                                                                                                                                                                                                                                                                                                                                                                                                                                                                                                                                                                                                                                                                                                                                                                                                                                                                                                                                                                                                                                                                                                                                                                                                                                                                                                                      | -1.24585 | 0.58636  |         |          |   |         |         |          |   |         |          |          |   |         |         |          |   |          |         |          |   |         |         |          |   |         |          |          |   |         |         |          |   |         |         |          |   |          |          |         |   |         |         |         |   |         |         |         |   |         |         |         |   |         |         |         |   |         |         |         |   |         |         |         |   |         |         |         |   |         |         |         |   |         |          |         |   |         |          |         |   |         |         |         |   |          |         |         |   |          |         |         |   |         |         |         |   |         |         |         |   |          |         |         |   |         |         |         |   |         |          |         |   |         |         |         |   |          |         |         |   |         |         |         |   |         |         |         |   |         |         |         |   |         |         |         |   |         |          |         |   |         |          |         |   |         |          |         |   |         |          |         |   |          |          |          |   |         |         |          |
| H                                                                                                                                                                                                                                                                     | 0.77569                                                                                                                                                                                                                                                                                                                                                                                                                                                                                                                                                                                                                                                                                                                                                                                                                                                                                                                                                                                                                                                                                                                                                                                                                                                                                                                                                                                                                                                                                                                                                                                                                                                                                                                                                                                                                                                                                                                                                                                                                                                                                                                                                                                                                                                                                                                                                                                                                                                                                                                                                                                                                                                                                                                                                                                                                                                                                                                                      | 2.19485  | -2.04425 |         |          |   |         |         |          |   |         |          |          |   |         |         |          |   |          |         |          |   |         |         |          |   |         |          |          |   |         |         |          |   |         |         |          |   |          |          |         |   |         |         |         |   |         |         |         |   |         |         |         |   |         |         |         |   |         |         |         |   |         |         |         |   |         |         |         |   |         |         |         |   |         |          |         |   |         |          |         |   |         |         |         |   |          |         |         |   |          |         |         |   |         |         |         |   |         |         |         |   |          |         |         |   |         |         |         |   |         |          |         |   |         |         |         |   |          |         |         |   |         |         |         |   |         |         |         |   |         |         |         |   |         |         |         |   |         |          |         |   |         |          |         |   |         |          |         |   |         |          |         |   |          |          |          |   |         |         |          |
| H                                                                                                                                                                                                                                                                     | 2.45600                                                                                                                                                                                                                                                                                                                                                                                                                                                                                                                                                                                                                                                                                                                                                                                                                                                                                                                                                                                                                                                                                                                                                                                                                                                                                                                                                                                                                                                                                                                                                                                                                                                                                                                                                                                                                                                                                                                                                                                                                                                                                                                                                                                                                                                                                                                                                                                                                                                                                                                                                                                                                                                                                                                                                                                                                                                                                                                                      | 0.31358  | -1.50877 |         |          |   |         |         |          |   |         |          |          |   |         |         |          |   |          |         |          |   |         |         |          |   |         |          |          |   |         |         |          |   |         |         |          |   |          |          |         |   |         |         |         |   |         |         |         |   |         |         |         |   |         |         |         |   |         |         |         |   |         |         |         |   |         |         |         |   |         |         |         |   |         |          |         |   |         |          |         |   |         |         |         |   |          |         |         |   |          |         |         |   |         |         |         |   |         |         |         |   |          |         |         |   |         |         |         |   |         |          |         |   |         |         |         |   |          |         |         |   |         |         |         |   |         |         |         |   |         |         |         |   |         |         |         |   |         |          |         |   |         |          |         |   |         |          |         |   |         |          |         |   |          |          |          |   |         |         |          |
| H                                                                                                                                                                                                                                                                     | -0.48313                                                                                                                                                                                                                                                                                                                                                                                                                                                                                                                                                                                                                                                                                                                                                                                                                                                                                                                                                                                                                                                                                                                                                                                                                                                                                                                                                                                                                                                                                                                                                                                                                                                                                                                                                                                                                                                                                                                                                                                                                                                                                                                                                                                                                                                                                                                                                                                                                                                                                                                                                                                                                                                                                                                                                                                                                                                                                                                                     | -0.07718 | 1.27867  |         |          |   |         |         |          |   |         |          |          |   |         |         |          |   |          |         |          |   |         |         |          |   |         |          |          |   |         |         |          |   |         |         |          |   |          |          |         |   |         |         |         |   |         |         |         |   |         |         |         |   |         |         |         |   |         |         |         |   |         |         |         |   |         |         |         |   |         |         |         |   |         |          |         |   |         |          |         |   |         |         |         |   |          |         |         |   |          |         |         |   |         |         |         |   |         |         |         |   |          |         |         |   |         |         |         |   |         |          |         |   |         |         |         |   |          |         |         |   |         |         |         |   |         |         |         |   |         |         |         |   |         |         |         |   |         |          |         |   |         |          |         |   |         |          |         |   |         |          |         |   |          |          |          |   |         |         |          |
| <p style="text-align: center;">Molecule: <b>1a_TS1 (C-attack)</b></p>  <p style="text-align: center;">Energy = -882.303588 Hartree<br/>Imag. Freq. = -467.6800 cm<sup>-1</sup></p> | <p style="text-align: center;">40</p> <table border="1"> <tbody> <tr><td>C</td><td>0.69628</td><td>1.90746</td><td>-0.26818</td></tr> <tr><td>C</td><td>1.99611</td><td>2.26215</td><td>-0.67969</td></tr> <tr><td>C</td><td>1.93061</td><td>-0.02048</td><td>-0.50088</td></tr> <tr><td>N</td><td>0.66717</td><td>0.50655</td><td>-0.33173</td></tr> <tr><td>H</td><td>-0.17835</td><td>2.47478</td><td>-0.56215</td></tr> <tr><td>N</td><td>2.72487</td><td>1.16168</td><td>-0.77097</td></tr> <tr><td>O</td><td>2.33718</td><td>-1.14733</td><td>-0.45982</td></tr> <tr><td>H</td><td>2.39401</td><td>3.26149</td><td>-0.80469</td></tr> <tr><td>C</td><td>1.01271</td><td>3.93089</td><td>1.70187</td></tr> <tr><td>C</td><td>0.77557</td><td>2.47879</td><td>1.66217</td></tr> <tr><td>C</td><td>1.61584</td><td>1.47340</td><td>2.30155</td></tr> <tr><td>C</td><td>0.10775</td><td>4.78449</td><td>1.04571</td></tr> <tr><td>C</td><td>0.28480</td><td>6.15638</td><td>1.05208</td></tr> <tr><td>C</td><td>1.35933</td><td>6.74127</td><td>1.73499</td></tr> <tr><td>C</td><td>2.23485</td><td>5.89570</td><td>2.42221</td></tr> <tr><td>C</td><td>2.07213</td><td>4.51780</td><td>2.40898</td></tr> <tr><td>C</td><td>3.02412</td><td>1.49137</td><td>2.26921</td></tr> <tr><td>C</td><td>3.75945</td><td>0.47488</td><td>2.85368</td></tr> <tr><td>C</td><td>3.13009</td><td>-0.61167</td><td>3.47472</td></tr> <tr><td>C</td><td>1.73016</td><td>-0.63753</td><td>3.50066</td></tr> <tr><td>C</td><td>0.98972</td><td>0.37471</td><td>2.91790</td></tr> <tr><td>H</td><td>-0.28643</td><td>2.24165</td><td>1.76320</td></tr> <tr><td>H</td><td>-0.75585</td><td>4.37024</td><td>0.52918</td></tr> <tr><td>H</td><td>2.74059</td><td>3.90297</td><td>3.00050</td></tr> <tr><td>H</td><td>3.54773</td><td>2.30456</td><td>1.77530</td></tr> <tr><td>H</td><td>-0.09670</td><td>0.33549</td><td>2.96056</td></tr> <tr><td>H</td><td>4.84519</td><td>0.51257</td><td>2.82194</td></tr> <tr><td>H</td><td>1.21995</td><td>-1.46615</td><td>3.98361</td></tr> <tr><td>H</td><td>3.05164</td><td>6.32655</td><td>2.99522</td></tr> <tr><td>H</td><td>-0.42778</td><td>6.79089</td><td>0.53167</td></tr> <tr><td>C</td><td>1.52598</td><td>8.23026</td><td>1.77184</td></tr> <tr><td>H</td><td>0.88915</td><td>8.66361</td><td>2.55309</td></tr> <tr><td>H</td><td>2.55755</td><td>8.51453</td><td>1.99272</td></tr> <tr><td>H</td><td>1.23090</td><td>8.68787</td><td>0.82349</td></tr> <tr><td>C</td><td>3.93362</td><td>-1.73084</td><td>4.06089</td></tr> <tr><td>H</td><td>3.39018</td><td>-2.23909</td><td>4.86109</td></tr> <tr><td>H</td><td>4.15605</td><td>-2.47799</td><td>3.28846</td></tr> <tr><td>H</td><td>4.88896</td><td>-1.37414</td><td>4.45484</td></tr> <tr><td>H</td><td>-0.09263</td><td>-0.07542</td><td>-0.01484</td></tr> <tr><td>H</td><td>3.72151</td><td>1.10165</td><td>-0.93439</td></tr> </tbody> </table> | C        | 0.69628  | 1.90746 | -0.26818 | C | 1.99611 | 2.26215 | -0.67969 | C | 1.93061 | -0.02048 | -0.50088 | N | 0.66717 | 0.50655 | -0.33173 | H | -0.17835 | 2.47478 | -0.56215 | N | 2.72487 | 1.16168 | -0.77097 | O | 2.33718 | -1.14733 | -0.45982 | H | 2.39401 | 3.26149 | -0.80469 | C | 1.01271 | 3.93089 | 1.70187  | C | 0.77557  | 2.47879  | 1.66217 | C | 1.61584 | 1.47340 | 2.30155 | C | 0.10775 | 4.78449 | 1.04571 | C | 0.28480 | 6.15638 | 1.05208 | C | 1.35933 | 6.74127 | 1.73499 | C | 2.23485 | 5.89570 | 2.42221 | C | 2.07213 | 4.51780 | 2.40898 | C | 3.02412 | 1.49137 | 2.26921 | C | 3.75945 | 0.47488 | 2.85368 | C | 3.13009 | -0.61167 | 3.47472 | C | 1.73016 | -0.63753 | 3.50066 | C | 0.98972 | 0.37471 | 2.91790 | H | -0.28643 | 2.24165 | 1.76320 | H | -0.75585 | 4.37024 | 0.52918 | H | 2.74059 | 3.90297 | 3.00050 | H | 3.54773 | 2.30456 | 1.77530 | H | -0.09670 | 0.33549 | 2.96056 | H | 4.84519 | 0.51257 | 2.82194 | H | 1.21995 | -1.46615 | 3.98361 | H | 3.05164 | 6.32655 | 2.99522 | H | -0.42778 | 6.79089 | 0.53167 | C | 1.52598 | 8.23026 | 1.77184 | H | 0.88915 | 8.66361 | 2.55309 | H | 2.55755 | 8.51453 | 1.99272 | H | 1.23090 | 8.68787 | 0.82349 | C | 3.93362 | -1.73084 | 4.06089 | H | 3.39018 | -2.23909 | 4.86109 | H | 4.15605 | -2.47799 | 3.28846 | H | 4.88896 | -1.37414 | 4.45484 | H | -0.09263 | -0.07542 | -0.01484 | H | 3.72151 | 1.10165 | -0.93439 |
| C                                                                                                                                                                                                                                                                     | 0.69628                                                                                                                                                                                                                                                                                                                                                                                                                                                                                                                                                                                                                                                                                                                                                                                                                                                                                                                                                                                                                                                                                                                                                                                                                                                                                                                                                                                                                                                                                                                                                                                                                                                                                                                                                                                                                                                                                                                                                                                                                                                                                                                                                                                                                                                                                                                                                                                                                                                                                                                                                                                                                                                                                                                                                                                                                                                                                                                                      | 1.90746  | -0.26818 |         |          |   |         |         |          |   |         |          |          |   |         |         |          |   |          |         |          |   |         |         |          |   |         |          |          |   |         |         |          |   |         |         |          |   |          |          |         |   |         |         |         |   |         |         |         |   |         |         |         |   |         |         |         |   |         |         |         |   |         |         |         |   |         |         |         |   |         |         |         |   |         |          |         |   |         |          |         |   |         |         |         |   |          |         |         |   |          |         |         |   |         |         |         |   |         |         |         |   |          |         |         |   |         |         |         |   |         |          |         |   |         |         |         |   |          |         |         |   |         |         |         |   |         |         |         |   |         |         |         |   |         |         |         |   |         |          |         |   |         |          |         |   |         |          |         |   |         |          |         |   |          |          |          |   |         |         |          |
| C                                                                                                                                                                                                                                                                     | 1.99611                                                                                                                                                                                                                                                                                                                                                                                                                                                                                                                                                                                                                                                                                                                                                                                                                                                                                                                                                                                                                                                                                                                                                                                                                                                                                                                                                                                                                                                                                                                                                                                                                                                                                                                                                                                                                                                                                                                                                                                                                                                                                                                                                                                                                                                                                                                                                                                                                                                                                                                                                                                                                                                                                                                                                                                                                                                                                                                                      | 2.26215  | -0.67969 |         |          |   |         |         |          |   |         |          |          |   |         |         |          |   |          |         |          |   |         |         |          |   |         |          |          |   |         |         |          |   |         |         |          |   |          |          |         |   |         |         |         |   |         |         |         |   |         |         |         |   |         |         |         |   |         |         |         |   |         |         |         |   |         |         |         |   |         |         |         |   |         |          |         |   |         |          |         |   |         |         |         |   |          |         |         |   |          |         |         |   |         |         |         |   |         |         |         |   |          |         |         |   |         |         |         |   |         |          |         |   |         |         |         |   |          |         |         |   |         |         |         |   |         |         |         |   |         |         |         |   |         |         |         |   |         |          |         |   |         |          |         |   |         |          |         |   |         |          |         |   |          |          |          |   |         |         |          |
| C                                                                                                                                                                                                                                                                     | 1.93061                                                                                                                                                                                                                                                                                                                                                                                                                                                                                                                                                                                                                                                                                                                                                                                                                                                                                                                                                                                                                                                                                                                                                                                                                                                                                                                                                                                                                                                                                                                                                                                                                                                                                                                                                                                                                                                                                                                                                                                                                                                                                                                                                                                                                                                                                                                                                                                                                                                                                                                                                                                                                                                                                                                                                                                                                                                                                                                                      | -0.02048 | -0.50088 |         |          |   |         |         |          |   |         |          |          |   |         |         |          |   |          |         |          |   |         |         |          |   |         |          |          |   |         |         |          |   |         |         |          |   |          |          |         |   |         |         |         |   |         |         |         |   |         |         |         |   |         |         |         |   |         |         |         |   |         |         |         |   |         |         |         |   |         |         |         |   |         |          |         |   |         |          |         |   |         |         |         |   |          |         |         |   |          |         |         |   |         |         |         |   |         |         |         |   |          |         |         |   |         |         |         |   |         |          |         |   |         |         |         |   |          |         |         |   |         |         |         |   |         |         |         |   |         |         |         |   |         |         |         |   |         |          |         |   |         |          |         |   |         |          |         |   |         |          |         |   |          |          |          |   |         |         |          |
| N                                                                                                                                                                                                                                                                     | 0.66717                                                                                                                                                                                                                                                                                                                                                                                                                                                                                                                                                                                                                                                                                                                                                                                                                                                                                                                                                                                                                                                                                                                                                                                                                                                                                                                                                                                                                                                                                                                                                                                                                                                                                                                                                                                                                                                                                                                                                                                                                                                                                                                                                                                                                                                                                                                                                                                                                                                                                                                                                                                                                                                                                                                                                                                                                                                                                                                                      | 0.50655  | -0.33173 |         |          |   |         |         |          |   |         |          |          |   |         |         |          |   |          |         |          |   |         |         |          |   |         |          |          |   |         |         |          |   |         |         |          |   |          |          |         |   |         |         |         |   |         |         |         |   |         |         |         |   |         |         |         |   |         |         |         |   |         |         |         |   |         |         |         |   |         |         |         |   |         |          |         |   |         |          |         |   |         |         |         |   |          |         |         |   |          |         |         |   |         |         |         |   |         |         |         |   |          |         |         |   |         |         |         |   |         |          |         |   |         |         |         |   |          |         |         |   |         |         |         |   |         |         |         |   |         |         |         |   |         |         |         |   |         |          |         |   |         |          |         |   |         |          |         |   |         |          |         |   |          |          |          |   |         |         |          |
| H                                                                                                                                                                                                                                                                     | -0.17835                                                                                                                                                                                                                                                                                                                                                                                                                                                                                                                                                                                                                                                                                                                                                                                                                                                                                                                                                                                                                                                                                                                                                                                                                                                                                                                                                                                                                                                                                                                                                                                                                                                                                                                                                                                                                                                                                                                                                                                                                                                                                                                                                                                                                                                                                                                                                                                                                                                                                                                                                                                                                                                                                                                                                                                                                                                                                                                                     | 2.47478  | -0.56215 |         |          |   |         |         |          |   |         |          |          |   |         |         |          |   |          |         |          |   |         |         |          |   |         |          |          |   |         |         |          |   |         |         |          |   |          |          |         |   |         |         |         |   |         |         |         |   |         |         |         |   |         |         |         |   |         |         |         |   |         |         |         |   |         |         |         |   |         |         |         |   |         |          |         |   |         |          |         |   |         |         |         |   |          |         |         |   |          |         |         |   |         |         |         |   |         |         |         |   |          |         |         |   |         |         |         |   |         |          |         |   |         |         |         |   |          |         |         |   |         |         |         |   |         |         |         |   |         |         |         |   |         |         |         |   |         |          |         |   |         |          |         |   |         |          |         |   |         |          |         |   |          |          |          |   |         |         |          |
| N                                                                                                                                                                                                                                                                     | 2.72487                                                                                                                                                                                                                                                                                                                                                                                                                                                                                                                                                                                                                                                                                                                                                                                                                                                                                                                                                                                                                                                                                                                                                                                                                                                                                                                                                                                                                                                                                                                                                                                                                                                                                                                                                                                                                                                                                                                                                                                                                                                                                                                                                                                                                                                                                                                                                                                                                                                                                                                                                                                                                                                                                                                                                                                                                                                                                                                                      | 1.16168  | -0.77097 |         |          |   |         |         |          |   |         |          |          |   |         |         |          |   |          |         |          |   |         |         |          |   |         |          |          |   |         |         |          |   |         |         |          |   |          |          |         |   |         |         |         |   |         |         |         |   |         |         |         |   |         |         |         |   |         |         |         |   |         |         |         |   |         |         |         |   |         |         |         |   |         |          |         |   |         |          |         |   |         |         |         |   |          |         |         |   |          |         |         |   |         |         |         |   |         |         |         |   |          |         |         |   |         |         |         |   |         |          |         |   |         |         |         |   |          |         |         |   |         |         |         |   |         |         |         |   |         |         |         |   |         |         |         |   |         |          |         |   |         |          |         |   |         |          |         |   |         |          |         |   |          |          |          |   |         |         |          |
| O                                                                                                                                                                                                                                                                     | 2.33718                                                                                                                                                                                                                                                                                                                                                                                                                                                                                                                                                                                                                                                                                                                                                                                                                                                                                                                                                                                                                                                                                                                                                                                                                                                                                                                                                                                                                                                                                                                                                                                                                                                                                                                                                                                                                                                                                                                                                                                                                                                                                                                                                                                                                                                                                                                                                                                                                                                                                                                                                                                                                                                                                                                                                                                                                                                                                                                                      | -1.14733 | -0.45982 |         |          |   |         |         |          |   |         |          |          |   |         |         |          |   |          |         |          |   |         |         |          |   |         |          |          |   |         |         |          |   |         |         |          |   |          |          |         |   |         |         |         |   |         |         |         |   |         |         |         |   |         |         |         |   |         |         |         |   |         |         |         |   |         |         |         |   |         |         |         |   |         |          |         |   |         |          |         |   |         |         |         |   |          |         |         |   |          |         |         |   |         |         |         |   |         |         |         |   |          |         |         |   |         |         |         |   |         |          |         |   |         |         |         |   |          |         |         |   |         |         |         |   |         |         |         |   |         |         |         |   |         |         |         |   |         |          |         |   |         |          |         |   |         |          |         |   |         |          |         |   |          |          |          |   |         |         |          |
| H                                                                                                                                                                                                                                                                     | 2.39401                                                                                                                                                                                                                                                                                                                                                                                                                                                                                                                                                                                                                                                                                                                                                                                                                                                                                                                                                                                                                                                                                                                                                                                                                                                                                                                                                                                                                                                                                                                                                                                                                                                                                                                                                                                                                                                                                                                                                                                                                                                                                                                                                                                                                                                                                                                                                                                                                                                                                                                                                                                                                                                                                                                                                                                                                                                                                                                                      | 3.26149  | -0.80469 |         |          |   |         |         |          |   |         |          |          |   |         |         |          |   |          |         |          |   |         |         |          |   |         |          |          |   |         |         |          |   |         |         |          |   |          |          |         |   |         |         |         |   |         |         |         |   |         |         |         |   |         |         |         |   |         |         |         |   |         |         |         |   |         |         |         |   |         |         |         |   |         |          |         |   |         |          |         |   |         |         |         |   |          |         |         |   |          |         |         |   |         |         |         |   |         |         |         |   |          |         |         |   |         |         |         |   |         |          |         |   |         |         |         |   |          |         |         |   |         |         |         |   |         |         |         |   |         |         |         |   |         |         |         |   |         |          |         |   |         |          |         |   |         |          |         |   |         |          |         |   |          |          |          |   |         |         |          |
| C                                                                                                                                                                                                                                                                     | 1.01271                                                                                                                                                                                                                                                                                                                                                                                                                                                                                                                                                                                                                                                                                                                                                                                                                                                                                                                                                                                                                                                                                                                                                                                                                                                                                                                                                                                                                                                                                                                                                                                                                                                                                                                                                                                                                                                                                                                                                                                                                                                                                                                                                                                                                                                                                                                                                                                                                                                                                                                                                                                                                                                                                                                                                                                                                                                                                                                                      | 3.93089  | 1.70187  |         |          |   |         |         |          |   |         |          |          |   |         |         |          |   |          |         |          |   |         |         |          |   |         |          |          |   |         |         |          |   |         |         |          |   |          |          |         |   |         |         |         |   |         |         |         |   |         |         |         |   |         |         |         |   |         |         |         |   |         |         |         |   |         |         |         |   |         |         |         |   |         |          |         |   |         |          |         |   |         |         |         |   |          |         |         |   |          |         |         |   |         |         |         |   |         |         |         |   |          |         |         |   |         |         |         |   |         |          |         |   |         |         |         |   |          |         |         |   |         |         |         |   |         |         |         |   |         |         |         |   |         |         |         |   |         |          |         |   |         |          |         |   |         |          |         |   |         |          |         |   |          |          |          |   |         |         |          |
| C                                                                                                                                                                                                                                                                     | 0.77557                                                                                                                                                                                                                                                                                                                                                                                                                                                                                                                                                                                                                                                                                                                                                                                                                                                                                                                                                                                                                                                                                                                                                                                                                                                                                                                                                                                                                                                                                                                                                                                                                                                                                                                                                                                                                                                                                                                                                                                                                                                                                                                                                                                                                                                                                                                                                                                                                                                                                                                                                                                                                                                                                                                                                                                                                                                                                                                                      | 2.47879  | 1.66217  |         |          |   |         |         |          |   |         |          |          |   |         |         |          |   |          |         |          |   |         |         |          |   |         |          |          |   |         |         |          |   |         |         |          |   |          |          |         |   |         |         |         |   |         |         |         |   |         |         |         |   |         |         |         |   |         |         |         |   |         |         |         |   |         |         |         |   |         |         |         |   |         |          |         |   |         |          |         |   |         |         |         |   |          |         |         |   |          |         |         |   |         |         |         |   |         |         |         |   |          |         |         |   |         |         |         |   |         |          |         |   |         |         |         |   |          |         |         |   |         |         |         |   |         |         |         |   |         |         |         |   |         |         |         |   |         |          |         |   |         |          |         |   |         |          |         |   |         |          |         |   |          |          |          |   |         |         |          |
| C                                                                                                                                                                                                                                                                     | 1.61584                                                                                                                                                                                                                                                                                                                                                                                                                                                                                                                                                                                                                                                                                                                                                                                                                                                                                                                                                                                                                                                                                                                                                                                                                                                                                                                                                                                                                                                                                                                                                                                                                                                                                                                                                                                                                                                                                                                                                                                                                                                                                                                                                                                                                                                                                                                                                                                                                                                                                                                                                                                                                                                                                                                                                                                                                                                                                                                                      | 1.47340  | 2.30155  |         |          |   |         |         |          |   |         |          |          |   |         |         |          |   |          |         |          |   |         |         |          |   |         |          |          |   |         |         |          |   |         |         |          |   |          |          |         |   |         |         |         |   |         |         |         |   |         |         |         |   |         |         |         |   |         |         |         |   |         |         |         |   |         |         |         |   |         |         |         |   |         |          |         |   |         |          |         |   |         |         |         |   |          |         |         |   |          |         |         |   |         |         |         |   |         |         |         |   |          |         |         |   |         |         |         |   |         |          |         |   |         |         |         |   |          |         |         |   |         |         |         |   |         |         |         |   |         |         |         |   |         |         |         |   |         |          |         |   |         |          |         |   |         |          |         |   |         |          |         |   |          |          |          |   |         |         |          |
| C                                                                                                                                                                                                                                                                     | 0.10775                                                                                                                                                                                                                                                                                                                                                                                                                                                                                                                                                                                                                                                                                                                                                                                                                                                                                                                                                                                                                                                                                                                                                                                                                                                                                                                                                                                                                                                                                                                                                                                                                                                                                                                                                                                                                                                                                                                                                                                                                                                                                                                                                                                                                                                                                                                                                                                                                                                                                                                                                                                                                                                                                                                                                                                                                                                                                                                                      | 4.78449  | 1.04571  |         |          |   |         |         |          |   |         |          |          |   |         |         |          |   |          |         |          |   |         |         |          |   |         |          |          |   |         |         |          |   |         |         |          |   |          |          |         |   |         |         |         |   |         |         |         |   |         |         |         |   |         |         |         |   |         |         |         |   |         |         |         |   |         |         |         |   |         |         |         |   |         |          |         |   |         |          |         |   |         |         |         |   |          |         |         |   |          |         |         |   |         |         |         |   |         |         |         |   |          |         |         |   |         |         |         |   |         |          |         |   |         |         |         |   |          |         |         |   |         |         |         |   |         |         |         |   |         |         |         |   |         |         |         |   |         |          |         |   |         |          |         |   |         |          |         |   |         |          |         |   |          |          |          |   |         |         |          |
| C                                                                                                                                                                                                                                                                     | 0.28480                                                                                                                                                                                                                                                                                                                                                                                                                                                                                                                                                                                                                                                                                                                                                                                                                                                                                                                                                                                                                                                                                                                                                                                                                                                                                                                                                                                                                                                                                                                                                                                                                                                                                                                                                                                                                                                                                                                                                                                                                                                                                                                                                                                                                                                                                                                                                                                                                                                                                                                                                                                                                                                                                                                                                                                                                                                                                                                                      | 6.15638  | 1.05208  |         |          |   |         |         |          |   |         |          |          |   |         |         |          |   |          |         |          |   |         |         |          |   |         |          |          |   |         |         |          |   |         |         |          |   |          |          |         |   |         |         |         |   |         |         |         |   |         |         |         |   |         |         |         |   |         |         |         |   |         |         |         |   |         |         |         |   |         |         |         |   |         |          |         |   |         |          |         |   |         |         |         |   |          |         |         |   |          |         |         |   |         |         |         |   |         |         |         |   |          |         |         |   |         |         |         |   |         |          |         |   |         |         |         |   |          |         |         |   |         |         |         |   |         |         |         |   |         |         |         |   |         |         |         |   |         |          |         |   |         |          |         |   |         |          |         |   |         |          |         |   |          |          |          |   |         |         |          |
| C                                                                                                                                                                                                                                                                     | 1.35933                                                                                                                                                                                                                                                                                                                                                                                                                                                                                                                                                                                                                                                                                                                                                                                                                                                                                                                                                                                                                                                                                                                                                                                                                                                                                                                                                                                                                                                                                                                                                                                                                                                                                                                                                                                                                                                                                                                                                                                                                                                                                                                                                                                                                                                                                                                                                                                                                                                                                                                                                                                                                                                                                                                                                                                                                                                                                                                                      | 6.74127  | 1.73499  |         |          |   |         |         |          |   |         |          |          |   |         |         |          |   |          |         |          |   |         |         |          |   |         |          |          |   |         |         |          |   |         |         |          |   |          |          |         |   |         |         |         |   |         |         |         |   |         |         |         |   |         |         |         |   |         |         |         |   |         |         |         |   |         |         |         |   |         |         |         |   |         |          |         |   |         |          |         |   |         |         |         |   |          |         |         |   |          |         |         |   |         |         |         |   |         |         |         |   |          |         |         |   |         |         |         |   |         |          |         |   |         |         |         |   |          |         |         |   |         |         |         |   |         |         |         |   |         |         |         |   |         |         |         |   |         |          |         |   |         |          |         |   |         |          |         |   |         |          |         |   |          |          |          |   |         |         |          |
| C                                                                                                                                                                                                                                                                     | 2.23485                                                                                                                                                                                                                                                                                                                                                                                                                                                                                                                                                                                                                                                                                                                                                                                                                                                                                                                                                                                                                                                                                                                                                                                                                                                                                                                                                                                                                                                                                                                                                                                                                                                                                                                                                                                                                                                                                                                                                                                                                                                                                                                                                                                                                                                                                                                                                                                                                                                                                                                                                                                                                                                                                                                                                                                                                                                                                                                                      | 5.89570  | 2.42221  |         |          |   |         |         |          |   |         |          |          |   |         |         |          |   |          |         |          |   |         |         |          |   |         |          |          |   |         |         |          |   |         |         |          |   |          |          |         |   |         |         |         |   |         |         |         |   |         |         |         |   |         |         |         |   |         |         |         |   |         |         |         |   |         |         |         |   |         |         |         |   |         |          |         |   |         |          |         |   |         |         |         |   |          |         |         |   |          |         |         |   |         |         |         |   |         |         |         |   |          |         |         |   |         |         |         |   |         |          |         |   |         |         |         |   |          |         |         |   |         |         |         |   |         |         |         |   |         |         |         |   |         |         |         |   |         |          |         |   |         |          |         |   |         |          |         |   |         |          |         |   |          |          |          |   |         |         |          |
| C                                                                                                                                                                                                                                                                     | 2.07213                                                                                                                                                                                                                                                                                                                                                                                                                                                                                                                                                                                                                                                                                                                                                                                                                                                                                                                                                                                                                                                                                                                                                                                                                                                                                                                                                                                                                                                                                                                                                                                                                                                                                                                                                                                                                                                                                                                                                                                                                                                                                                                                                                                                                                                                                                                                                                                                                                                                                                                                                                                                                                                                                                                                                                                                                                                                                                                                      | 4.51780  | 2.40898  |         |          |   |         |         |          |   |         |          |          |   |         |         |          |   |          |         |          |   |         |         |          |   |         |          |          |   |         |         |          |   |         |         |          |   |          |          |         |   |         |         |         |   |         |         |         |   |         |         |         |   |         |         |         |   |         |         |         |   |         |         |         |   |         |         |         |   |         |         |         |   |         |          |         |   |         |          |         |   |         |         |         |   |          |         |         |   |          |         |         |   |         |         |         |   |         |         |         |   |          |         |         |   |         |         |         |   |         |          |         |   |         |         |         |   |          |         |         |   |         |         |         |   |         |         |         |   |         |         |         |   |         |         |         |   |         |          |         |   |         |          |         |   |         |          |         |   |         |          |         |   |          |          |          |   |         |         |          |
| C                                                                                                                                                                                                                                                                     | 3.02412                                                                                                                                                                                                                                                                                                                                                                                                                                                                                                                                                                                                                                                                                                                                                                                                                                                                                                                                                                                                                                                                                                                                                                                                                                                                                                                                                                                                                                                                                                                                                                                                                                                                                                                                                                                                                                                                                                                                                                                                                                                                                                                                                                                                                                                                                                                                                                                                                                                                                                                                                                                                                                                                                                                                                                                                                                                                                                                                      | 1.49137  | 2.26921  |         |          |   |         |         |          |   |         |          |          |   |         |         |          |   |          |         |          |   |         |         |          |   |         |          |          |   |         |         |          |   |         |         |          |   |          |          |         |   |         |         |         |   |         |         |         |   |         |         |         |   |         |         |         |   |         |         |         |   |         |         |         |   |         |         |         |   |         |         |         |   |         |          |         |   |         |          |         |   |         |         |         |   |          |         |         |   |          |         |         |   |         |         |         |   |         |         |         |   |          |         |         |   |         |         |         |   |         |          |         |   |         |         |         |   |          |         |         |   |         |         |         |   |         |         |         |   |         |         |         |   |         |         |         |   |         |          |         |   |         |          |         |   |         |          |         |   |         |          |         |   |          |          |          |   |         |         |          |
| C                                                                                                                                                                                                                                                                     | 3.75945                                                                                                                                                                                                                                                                                                                                                                                                                                                                                                                                                                                                                                                                                                                                                                                                                                                                                                                                                                                                                                                                                                                                                                                                                                                                                                                                                                                                                                                                                                                                                                                                                                                                                                                                                                                                                                                                                                                                                                                                                                                                                                                                                                                                                                                                                                                                                                                                                                                                                                                                                                                                                                                                                                                                                                                                                                                                                                                                      | 0.47488  | 2.85368  |         |          |   |         |         |          |   |         |          |          |   |         |         |          |   |          |         |          |   |         |         |          |   |         |          |          |   |         |         |          |   |         |         |          |   |          |          |         |   |         |         |         |   |         |         |         |   |         |         |         |   |         |         |         |   |         |         |         |   |         |         |         |   |         |         |         |   |         |         |         |   |         |          |         |   |         |          |         |   |         |         |         |   |          |         |         |   |          |         |         |   |         |         |         |   |         |         |         |   |          |         |         |   |         |         |         |   |         |          |         |   |         |         |         |   |          |         |         |   |         |         |         |   |         |         |         |   |         |         |         |   |         |         |         |   |         |          |         |   |         |          |         |   |         |          |         |   |         |          |         |   |          |          |          |   |         |         |          |
| C                                                                                                                                                                                                                                                                     | 3.13009                                                                                                                                                                                                                                                                                                                                                                                                                                                                                                                                                                                                                                                                                                                                                                                                                                                                                                                                                                                                                                                                                                                                                                                                                                                                                                                                                                                                                                                                                                                                                                                                                                                                                                                                                                                                                                                                                                                                                                                                                                                                                                                                                                                                                                                                                                                                                                                                                                                                                                                                                                                                                                                                                                                                                                                                                                                                                                                                      | -0.61167 | 3.47472  |         |          |   |         |         |          |   |         |          |          |   |         |         |          |   |          |         |          |   |         |         |          |   |         |          |          |   |         |         |          |   |         |         |          |   |          |          |         |   |         |         |         |   |         |         |         |   |         |         |         |   |         |         |         |   |         |         |         |   |         |         |         |   |         |         |         |   |         |         |         |   |         |          |         |   |         |          |         |   |         |         |         |   |          |         |         |   |          |         |         |   |         |         |         |   |         |         |         |   |          |         |         |   |         |         |         |   |         |          |         |   |         |         |         |   |          |         |         |   |         |         |         |   |         |         |         |   |         |         |         |   |         |         |         |   |         |          |         |   |         |          |         |   |         |          |         |   |         |          |         |   |          |          |          |   |         |         |          |
| C                                                                                                                                                                                                                                                                     | 1.73016                                                                                                                                                                                                                                                                                                                                                                                                                                                                                                                                                                                                                                                                                                                                                                                                                                                                                                                                                                                                                                                                                                                                                                                                                                                                                                                                                                                                                                                                                                                                                                                                                                                                                                                                                                                                                                                                                                                                                                                                                                                                                                                                                                                                                                                                                                                                                                                                                                                                                                                                                                                                                                                                                                                                                                                                                                                                                                                                      | -0.63753 | 3.50066  |         |          |   |         |         |          |   |         |          |          |   |         |         |          |   |          |         |          |   |         |         |          |   |         |          |          |   |         |         |          |   |         |         |          |   |          |          |         |   |         |         |         |   |         |         |         |   |         |         |         |   |         |         |         |   |         |         |         |   |         |         |         |   |         |         |         |   |         |         |         |   |         |          |         |   |         |          |         |   |         |         |         |   |          |         |         |   |          |         |         |   |         |         |         |   |         |         |         |   |          |         |         |   |         |         |         |   |         |          |         |   |         |         |         |   |          |         |         |   |         |         |         |   |         |         |         |   |         |         |         |   |         |         |         |   |         |          |         |   |         |          |         |   |         |          |         |   |         |          |         |   |          |          |          |   |         |         |          |
| C                                                                                                                                                                                                                                                                     | 0.98972                                                                                                                                                                                                                                                                                                                                                                                                                                                                                                                                                                                                                                                                                                                                                                                                                                                                                                                                                                                                                                                                                                                                                                                                                                                                                                                                                                                                                                                                                                                                                                                                                                                                                                                                                                                                                                                                                                                                                                                                                                                                                                                                                                                                                                                                                                                                                                                                                                                                                                                                                                                                                                                                                                                                                                                                                                                                                                                                      | 0.37471  | 2.91790  |         |          |   |         |         |          |   |         |          |          |   |         |         |          |   |          |         |          |   |         |         |          |   |         |          |          |   |         |         |          |   |         |         |          |   |          |          |         |   |         |         |         |   |         |         |         |   |         |         |         |   |         |         |         |   |         |         |         |   |         |         |         |   |         |         |         |   |         |         |         |   |         |          |         |   |         |          |         |   |         |         |         |   |          |         |         |   |          |         |         |   |         |         |         |   |         |         |         |   |          |         |         |   |         |         |         |   |         |          |         |   |         |         |         |   |          |         |         |   |         |         |         |   |         |         |         |   |         |         |         |   |         |         |         |   |         |          |         |   |         |          |         |   |         |          |         |   |         |          |         |   |          |          |          |   |         |         |          |
| H                                                                                                                                                                                                                                                                     | -0.28643                                                                                                                                                                                                                                                                                                                                                                                                                                                                                                                                                                                                                                                                                                                                                                                                                                                                                                                                                                                                                                                                                                                                                                                                                                                                                                                                                                                                                                                                                                                                                                                                                                                                                                                                                                                                                                                                                                                                                                                                                                                                                                                                                                                                                                                                                                                                                                                                                                                                                                                                                                                                                                                                                                                                                                                                                                                                                                                                     | 2.24165  | 1.76320  |         |          |   |         |         |          |   |         |          |          |   |         |         |          |   |          |         |          |   |         |         |          |   |         |          |          |   |         |         |          |   |         |         |          |   |          |          |         |   |         |         |         |   |         |         |         |   |         |         |         |   |         |         |         |   |         |         |         |   |         |         |         |   |         |         |         |   |         |         |         |   |         |          |         |   |         |          |         |   |         |         |         |   |          |         |         |   |          |         |         |   |         |         |         |   |         |         |         |   |          |         |         |   |         |         |         |   |         |          |         |   |         |         |         |   |          |         |         |   |         |         |         |   |         |         |         |   |         |         |         |   |         |         |         |   |         |          |         |   |         |          |         |   |         |          |         |   |         |          |         |   |          |          |          |   |         |         |          |
| H                                                                                                                                                                                                                                                                     | -0.75585                                                                                                                                                                                                                                                                                                                                                                                                                                                                                                                                                                                                                                                                                                                                                                                                                                                                                                                                                                                                                                                                                                                                                                                                                                                                                                                                                                                                                                                                                                                                                                                                                                                                                                                                                                                                                                                                                                                                                                                                                                                                                                                                                                                                                                                                                                                                                                                                                                                                                                                                                                                                                                                                                                                                                                                                                                                                                                                                     | 4.37024  | 0.52918  |         |          |   |         |         |          |   |         |          |          |   |         |         |          |   |          |         |          |   |         |         |          |   |         |          |          |   |         |         |          |   |         |         |          |   |          |          |         |   |         |         |         |   |         |         |         |   |         |         |         |   |         |         |         |   |         |         |         |   |         |         |         |   |         |         |         |   |         |         |         |   |         |          |         |   |         |          |         |   |         |         |         |   |          |         |         |   |          |         |         |   |         |         |         |   |         |         |         |   |          |         |         |   |         |         |         |   |         |          |         |   |         |         |         |   |          |         |         |   |         |         |         |   |         |         |         |   |         |         |         |   |         |         |         |   |         |          |         |   |         |          |         |   |         |          |         |   |         |          |         |   |          |          |          |   |         |         |          |
| H                                                                                                                                                                                                                                                                     | 2.74059                                                                                                                                                                                                                                                                                                                                                                                                                                                                                                                                                                                                                                                                                                                                                                                                                                                                                                                                                                                                                                                                                                                                                                                                                                                                                                                                                                                                                                                                                                                                                                                                                                                                                                                                                                                                                                                                                                                                                                                                                                                                                                                                                                                                                                                                                                                                                                                                                                                                                                                                                                                                                                                                                                                                                                                                                                                                                                                                      | 3.90297  | 3.00050  |         |          |   |         |         |          |   |         |          |          |   |         |         |          |   |          |         |          |   |         |         |          |   |         |          |          |   |         |         |          |   |         |         |          |   |          |          |         |   |         |         |         |   |         |         |         |   |         |         |         |   |         |         |         |   |         |         |         |   |         |         |         |   |         |         |         |   |         |         |         |   |         |          |         |   |         |          |         |   |         |         |         |   |          |         |         |   |          |         |         |   |         |         |         |   |         |         |         |   |          |         |         |   |         |         |         |   |         |          |         |   |         |         |         |   |          |         |         |   |         |         |         |   |         |         |         |   |         |         |         |   |         |         |         |   |         |          |         |   |         |          |         |   |         |          |         |   |         |          |         |   |          |          |          |   |         |         |          |
| H                                                                                                                                                                                                                                                                     | 3.54773                                                                                                                                                                                                                                                                                                                                                                                                                                                                                                                                                                                                                                                                                                                                                                                                                                                                                                                                                                                                                                                                                                                                                                                                                                                                                                                                                                                                                                                                                                                                                                                                                                                                                                                                                                                                                                                                                                                                                                                                                                                                                                                                                                                                                                                                                                                                                                                                                                                                                                                                                                                                                                                                                                                                                                                                                                                                                                                                      | 2.30456  | 1.77530  |         |          |   |         |         |          |   |         |          |          |   |         |         |          |   |          |         |          |   |         |         |          |   |         |          |          |   |         |         |          |   |         |         |          |   |          |          |         |   |         |         |         |   |         |         |         |   |         |         |         |   |         |         |         |   |         |         |         |   |         |         |         |   |         |         |         |   |         |         |         |   |         |          |         |   |         |          |         |   |         |         |         |   |          |         |         |   |          |         |         |   |         |         |         |   |         |         |         |   |          |         |         |   |         |         |         |   |         |          |         |   |         |         |         |   |          |         |         |   |         |         |         |   |         |         |         |   |         |         |         |   |         |         |         |   |         |          |         |   |         |          |         |   |         |          |         |   |         |          |         |   |          |          |          |   |         |         |          |
| H                                                                                                                                                                                                                                                                     | -0.09670                                                                                                                                                                                                                                                                                                                                                                                                                                                                                                                                                                                                                                                                                                                                                                                                                                                                                                                                                                                                                                                                                                                                                                                                                                                                                                                                                                                                                                                                                                                                                                                                                                                                                                                                                                                                                                                                                                                                                                                                                                                                                                                                                                                                                                                                                                                                                                                                                                                                                                                                                                                                                                                                                                                                                                                                                                                                                                                                     | 0.33549  | 2.96056  |         |          |   |         |         |          |   |         |          |          |   |         |         |          |   |          |         |          |   |         |         |          |   |         |          |          |   |         |         |          |   |         |         |          |   |          |          |         |   |         |         |         |   |         |         |         |   |         |         |         |   |         |         |         |   |         |         |         |   |         |         |         |   |         |         |         |   |         |         |         |   |         |          |         |   |         |          |         |   |         |         |         |   |          |         |         |   |          |         |         |   |         |         |         |   |         |         |         |   |          |         |         |   |         |         |         |   |         |          |         |   |         |         |         |   |          |         |         |   |         |         |         |   |         |         |         |   |         |         |         |   |         |         |         |   |         |          |         |   |         |          |         |   |         |          |         |   |         |          |         |   |          |          |          |   |         |         |          |
| H                                                                                                                                                                                                                                                                     | 4.84519                                                                                                                                                                                                                                                                                                                                                                                                                                                                                                                                                                                                                                                                                                                                                                                                                                                                                                                                                                                                                                                                                                                                                                                                                                                                                                                                                                                                                                                                                                                                                                                                                                                                                                                                                                                                                                                                                                                                                                                                                                                                                                                                                                                                                                                                                                                                                                                                                                                                                                                                                                                                                                                                                                                                                                                                                                                                                                                                      | 0.51257  | 2.82194  |         |          |   |         |         |          |   |         |          |          |   |         |         |          |   |          |         |          |   |         |         |          |   |         |          |          |   |         |         |          |   |         |         |          |   |          |          |         |   |         |         |         |   |         |         |         |   |         |         |         |   |         |         |         |   |         |         |         |   |         |         |         |   |         |         |         |   |         |         |         |   |         |          |         |   |         |          |         |   |         |         |         |   |          |         |         |   |          |         |         |   |         |         |         |   |         |         |         |   |          |         |         |   |         |         |         |   |         |          |         |   |         |         |         |   |          |         |         |   |         |         |         |   |         |         |         |   |         |         |         |   |         |         |         |   |         |          |         |   |         |          |         |   |         |          |         |   |         |          |         |   |          |          |          |   |         |         |          |
| H                                                                                                                                                                                                                                                                     | 1.21995                                                                                                                                                                                                                                                                                                                                                                                                                                                                                                                                                                                                                                                                                                                                                                                                                                                                                                                                                                                                                                                                                                                                                                                                                                                                                                                                                                                                                                                                                                                                                                                                                                                                                                                                                                                                                                                                                                                                                                                                                                                                                                                                                                                                                                                                                                                                                                                                                                                                                                                                                                                                                                                                                                                                                                                                                                                                                                                                      | -1.46615 | 3.98361  |         |          |   |         |         |          |   |         |          |          |   |         |         |          |   |          |         |          |   |         |         |          |   |         |          |          |   |         |         |          |   |         |         |          |   |          |          |         |   |         |         |         |   |         |         |         |   |         |         |         |   |         |         |         |   |         |         |         |   |         |         |         |   |         |         |         |   |         |         |         |   |         |          |         |   |         |          |         |   |         |         |         |   |          |         |         |   |          |         |         |   |         |         |         |   |         |         |         |   |          |         |         |   |         |         |         |   |         |          |         |   |         |         |         |   |          |         |         |   |         |         |         |   |         |         |         |   |         |         |         |   |         |         |         |   |         |          |         |   |         |          |         |   |         |          |         |   |         |          |         |   |          |          |          |   |         |         |          |
| H                                                                                                                                                                                                                                                                     | 3.05164                                                                                                                                                                                                                                                                                                                                                                                                                                                                                                                                                                                                                                                                                                                                                                                                                                                                                                                                                                                                                                                                                                                                                                                                                                                                                                                                                                                                                                                                                                                                                                                                                                                                                                                                                                                                                                                                                                                                                                                                                                                                                                                                                                                                                                                                                                                                                                                                                                                                                                                                                                                                                                                                                                                                                                                                                                                                                                                                      | 6.32655  | 2.99522  |         |          |   |         |         |          |   |         |          |          |   |         |         |          |   |          |         |          |   |         |         |          |   |         |          |          |   |         |         |          |   |         |         |          |   |          |          |         |   |         |         |         |   |         |         |         |   |         |         |         |   |         |         |         |   |         |         |         |   |         |         |         |   |         |         |         |   |         |         |         |   |         |          |         |   |         |          |         |   |         |         |         |   |          |         |         |   |          |         |         |   |         |         |         |   |         |         |         |   |          |         |         |   |         |         |         |   |         |          |         |   |         |         |         |   |          |         |         |   |         |         |         |   |         |         |         |   |         |         |         |   |         |         |         |   |         |          |         |   |         |          |         |   |         |          |         |   |         |          |         |   |          |          |          |   |         |         |          |
| H                                                                                                                                                                                                                                                                     | -0.42778                                                                                                                                                                                                                                                                                                                                                                                                                                                                                                                                                                                                                                                                                                                                                                                                                                                                                                                                                                                                                                                                                                                                                                                                                                                                                                                                                                                                                                                                                                                                                                                                                                                                                                                                                                                                                                                                                                                                                                                                                                                                                                                                                                                                                                                                                                                                                                                                                                                                                                                                                                                                                                                                                                                                                                                                                                                                                                                                     | 6.79089  | 0.53167  |         |          |   |         |         |          |   |         |          |          |   |         |         |          |   |          |         |          |   |         |         |          |   |         |          |          |   |         |         |          |   |         |         |          |   |          |          |         |   |         |         |         |   |         |         |         |   |         |         |         |   |         |         |         |   |         |         |         |   |         |         |         |   |         |         |         |   |         |         |         |   |         |          |         |   |         |          |         |   |         |         |         |   |          |         |         |   |          |         |         |   |         |         |         |   |         |         |         |   |          |         |         |   |         |         |         |   |         |          |         |   |         |         |         |   |          |         |         |   |         |         |         |   |         |         |         |   |         |         |         |   |         |         |         |   |         |          |         |   |         |          |         |   |         |          |         |   |         |          |         |   |          |          |          |   |         |         |          |
| C                                                                                                                                                                                                                                                                     | 1.52598                                                                                                                                                                                                                                                                                                                                                                                                                                                                                                                                                                                                                                                                                                                                                                                                                                                                                                                                                                                                                                                                                                                                                                                                                                                                                                                                                                                                                                                                                                                                                                                                                                                                                                                                                                                                                                                                                                                                                                                                                                                                                                                                                                                                                                                                                                                                                                                                                                                                                                                                                                                                                                                                                                                                                                                                                                                                                                                                      | 8.23026  | 1.77184  |         |          |   |         |         |          |   |         |          |          |   |         |         |          |   |          |         |          |   |         |         |          |   |         |          |          |   |         |         |          |   |         |         |          |   |          |          |         |   |         |         |         |   |         |         |         |   |         |         |         |   |         |         |         |   |         |         |         |   |         |         |         |   |         |         |         |   |         |         |         |   |         |          |         |   |         |          |         |   |         |         |         |   |          |         |         |   |          |         |         |   |         |         |         |   |         |         |         |   |          |         |         |   |         |         |         |   |         |          |         |   |         |         |         |   |          |         |         |   |         |         |         |   |         |         |         |   |         |         |         |   |         |         |         |   |         |          |         |   |         |          |         |   |         |          |         |   |         |          |         |   |          |          |          |   |         |         |          |
| H                                                                                                                                                                                                                                                                     | 0.88915                                                                                                                                                                                                                                                                                                                                                                                                                                                                                                                                                                                                                                                                                                                                                                                                                                                                                                                                                                                                                                                                                                                                                                                                                                                                                                                                                                                                                                                                                                                                                                                                                                                                                                                                                                                                                                                                                                                                                                                                                                                                                                                                                                                                                                                                                                                                                                                                                                                                                                                                                                                                                                                                                                                                                                                                                                                                                                                                      | 8.66361  | 2.55309  |         |          |   |         |         |          |   |         |          |          |   |         |         |          |   |          |         |          |   |         |         |          |   |         |          |          |   |         |         |          |   |         |         |          |   |          |          |         |   |         |         |         |   |         |         |         |   |         |         |         |   |         |         |         |   |         |         |         |   |         |         |         |   |         |         |         |   |         |         |         |   |         |          |         |   |         |          |         |   |         |         |         |   |          |         |         |   |          |         |         |   |         |         |         |   |         |         |         |   |          |         |         |   |         |         |         |   |         |          |         |   |         |         |         |   |          |         |         |   |         |         |         |   |         |         |         |   |         |         |         |   |         |         |         |   |         |          |         |   |         |          |         |   |         |          |         |   |         |          |         |   |          |          |          |   |         |         |          |
| H                                                                                                                                                                                                                                                                     | 2.55755                                                                                                                                                                                                                                                                                                                                                                                                                                                                                                                                                                                                                                                                                                                                                                                                                                                                                                                                                                                                                                                                                                                                                                                                                                                                                                                                                                                                                                                                                                                                                                                                                                                                                                                                                                                                                                                                                                                                                                                                                                                                                                                                                                                                                                                                                                                                                                                                                                                                                                                                                                                                                                                                                                                                                                                                                                                                                                                                      | 8.51453  | 1.99272  |         |          |   |         |         |          |   |         |          |          |   |         |         |          |   |          |         |          |   |         |         |          |   |         |          |          |   |         |         |          |   |         |         |          |   |          |          |         |   |         |         |         |   |         |         |         |   |         |         |         |   |         |         |         |   |         |         |         |   |         |         |         |   |         |         |         |   |         |         |         |   |         |          |         |   |         |          |         |   |         |         |         |   |          |         |         |   |          |         |         |   |         |         |         |   |         |         |         |   |          |         |         |   |         |         |         |   |         |          |         |   |         |         |         |   |          |         |         |   |         |         |         |   |         |         |         |   |         |         |         |   |         |         |         |   |         |          |         |   |         |          |         |   |         |          |         |   |         |          |         |   |          |          |          |   |         |         |          |
| H                                                                                                                                                                                                                                                                     | 1.23090                                                                                                                                                                                                                                                                                                                                                                                                                                                                                                                                                                                                                                                                                                                                                                                                                                                                                                                                                                                                                                                                                                                                                                                                                                                                                                                                                                                                                                                                                                                                                                                                                                                                                                                                                                                                                                                                                                                                                                                                                                                                                                                                                                                                                                                                                                                                                                                                                                                                                                                                                                                                                                                                                                                                                                                                                                                                                                                                      | 8.68787  | 0.82349  |         |          |   |         |         |          |   |         |          |          |   |         |         |          |   |          |         |          |   |         |         |          |   |         |          |          |   |         |         |          |   |         |         |          |   |          |          |         |   |         |         |         |   |         |         |         |   |         |         |         |   |         |         |         |   |         |         |         |   |         |         |         |   |         |         |         |   |         |         |         |   |         |          |         |   |         |          |         |   |         |         |         |   |          |         |         |   |          |         |         |   |         |         |         |   |         |         |         |   |          |         |         |   |         |         |         |   |         |          |         |   |         |         |         |   |          |         |         |   |         |         |         |   |         |         |         |   |         |         |         |   |         |         |         |   |         |          |         |   |         |          |         |   |         |          |         |   |         |          |         |   |          |          |          |   |         |         |          |
| C                                                                                                                                                                                                                                                                     | 3.93362                                                                                                                                                                                                                                                                                                                                                                                                                                                                                                                                                                                                                                                                                                                                                                                                                                                                                                                                                                                                                                                                                                                                                                                                                                                                                                                                                                                                                                                                                                                                                                                                                                                                                                                                                                                                                                                                                                                                                                                                                                                                                                                                                                                                                                                                                                                                                                                                                                                                                                                                                                                                                                                                                                                                                                                                                                                                                                                                      | -1.73084 | 4.06089  |         |          |   |         |         |          |   |         |          |          |   |         |         |          |   |          |         |          |   |         |         |          |   |         |          |          |   |         |         |          |   |         |         |          |   |          |          |         |   |         |         |         |   |         |         |         |   |         |         |         |   |         |         |         |   |         |         |         |   |         |         |         |   |         |         |         |   |         |         |         |   |         |          |         |   |         |          |         |   |         |         |         |   |          |         |         |   |          |         |         |   |         |         |         |   |         |         |         |   |          |         |         |   |         |         |         |   |         |          |         |   |         |         |         |   |          |         |         |   |         |         |         |   |         |         |         |   |         |         |         |   |         |         |         |   |         |          |         |   |         |          |         |   |         |          |         |   |         |          |         |   |          |          |          |   |         |         |          |
| H                                                                                                                                                                                                                                                                     | 3.39018                                                                                                                                                                                                                                                                                                                                                                                                                                                                                                                                                                                                                                                                                                                                                                                                                                                                                                                                                                                                                                                                                                                                                                                                                                                                                                                                                                                                                                                                                                                                                                                                                                                                                                                                                                                                                                                                                                                                                                                                                                                                                                                                                                                                                                                                                                                                                                                                                                                                                                                                                                                                                                                                                                                                                                                                                                                                                                                                      | -2.23909 | 4.86109  |         |          |   |         |         |          |   |         |          |          |   |         |         |          |   |          |         |          |   |         |         |          |   |         |          |          |   |         |         |          |   |         |         |          |   |          |          |         |   |         |         |         |   |         |         |         |   |         |         |         |   |         |         |         |   |         |         |         |   |         |         |         |   |         |         |         |   |         |         |         |   |         |          |         |   |         |          |         |   |         |         |         |   |          |         |         |   |          |         |         |   |         |         |         |   |         |         |         |   |          |         |         |   |         |         |         |   |         |          |         |   |         |         |         |   |          |         |         |   |         |         |         |   |         |         |         |   |         |         |         |   |         |         |         |   |         |          |         |   |         |          |         |   |         |          |         |   |         |          |         |   |          |          |          |   |         |         |          |
| H                                                                                                                                                                                                                                                                     | 4.15605                                                                                                                                                                                                                                                                                                                                                                                                                                                                                                                                                                                                                                                                                                                                                                                                                                                                                                                                                                                                                                                                                                                                                                                                                                                                                                                                                                                                                                                                                                                                                                                                                                                                                                                                                                                                                                                                                                                                                                                                                                                                                                                                                                                                                                                                                                                                                                                                                                                                                                                                                                                                                                                                                                                                                                                                                                                                                                                                      | -2.47799 | 3.28846  |         |          |   |         |         |          |   |         |          |          |   |         |         |          |   |          |         |          |   |         |         |          |   |         |          |          |   |         |         |          |   |         |         |          |   |          |          |         |   |         |         |         |   |         |         |         |   |         |         |         |   |         |         |         |   |         |         |         |   |         |         |         |   |         |         |         |   |         |         |         |   |         |          |         |   |         |          |         |   |         |         |         |   |          |         |         |   |          |         |         |   |         |         |         |   |         |         |         |   |          |         |         |   |         |         |         |   |         |          |         |   |         |         |         |   |          |         |         |   |         |         |         |   |         |         |         |   |         |         |         |   |         |         |         |   |         |          |         |   |         |          |         |   |         |          |         |   |         |          |         |   |          |          |          |   |         |         |          |
| H                                                                                                                                                                                                                                                                     | 4.88896                                                                                                                                                                                                                                                                                                                                                                                                                                                                                                                                                                                                                                                                                                                                                                                                                                                                                                                                                                                                                                                                                                                                                                                                                                                                                                                                                                                                                                                                                                                                                                                                                                                                                                                                                                                                                                                                                                                                                                                                                                                                                                                                                                                                                                                                                                                                                                                                                                                                                                                                                                                                                                                                                                                                                                                                                                                                                                                                      | -1.37414 | 4.45484  |         |          |   |         |         |          |   |         |          |          |   |         |         |          |   |          |         |          |   |         |         |          |   |         |          |          |   |         |         |          |   |         |         |          |   |          |          |         |   |         |         |         |   |         |         |         |   |         |         |         |   |         |         |         |   |         |         |         |   |         |         |         |   |         |         |         |   |         |         |         |   |         |          |         |   |         |          |         |   |         |         |         |   |          |         |         |   |          |         |         |   |         |         |         |   |         |         |         |   |          |         |         |   |         |         |         |   |         |          |         |   |         |         |         |   |          |         |         |   |         |         |         |   |         |         |         |   |         |         |         |   |         |         |         |   |         |          |         |   |         |          |         |   |         |          |         |   |         |          |         |   |          |          |          |   |         |         |          |
| H                                                                                                                                                                                                                                                                     | -0.09263                                                                                                                                                                                                                                                                                                                                                                                                                                                                                                                                                                                                                                                                                                                                                                                                                                                                                                                                                                                                                                                                                                                                                                                                                                                                                                                                                                                                                                                                                                                                                                                                                                                                                                                                                                                                                                                                                                                                                                                                                                                                                                                                                                                                                                                                                                                                                                                                                                                                                                                                                                                                                                                                                                                                                                                                                                                                                                                                     | -0.07542 | -0.01484 |         |          |   |         |         |          |   |         |          |          |   |         |         |          |   |          |         |          |   |         |         |          |   |         |          |          |   |         |         |          |   |         |         |          |   |          |          |         |   |         |         |         |   |         |         |         |   |         |         |         |   |         |         |         |   |         |         |         |   |         |         |         |   |         |         |         |   |         |         |         |   |         |          |         |   |         |          |         |   |         |         |         |   |          |         |         |   |          |         |         |   |         |         |         |   |         |         |         |   |          |         |         |   |         |         |         |   |         |          |         |   |         |         |         |   |          |         |         |   |         |         |         |   |         |         |         |   |         |         |         |   |         |         |         |   |         |          |         |   |         |          |         |   |         |          |         |   |         |          |         |   |          |          |          |   |         |         |          |
| H                                                                                                                                                                                                                                                                     | 3.72151                                                                                                                                                                                                                                                                                                                                                                                                                                                                                                                                                                                                                                                                                                                                                                                                                                                                                                                                                                                                                                                                                                                                                                                                                                                                                                                                                                                                                                                                                                                                                                                                                                                                                                                                                                                                                                                                                                                                                                                                                                                                                                                                                                                                                                                                                                                                                                                                                                                                                                                                                                                                                                                                                                                                                                                                                                                                                                                                      | 1.10165  | -0.93439 |         |          |   |         |         |          |   |         |          |          |   |         |         |          |   |          |         |          |   |         |         |          |   |         |          |          |   |         |         |          |   |         |         |          |   |          |          |         |   |         |         |         |   |         |         |         |   |         |         |         |   |         |         |         |   |         |         |         |   |         |         |         |   |         |         |         |   |         |         |         |   |         |          |         |   |         |          |         |   |         |         |         |   |          |         |         |   |          |         |         |   |         |         |         |   |         |         |         |   |          |         |         |   |         |         |         |   |         |          |         |   |         |         |         |   |          |         |         |   |         |         |         |   |         |         |         |   |         |         |         |   |         |         |         |   |         |          |         |   |         |          |         |   |         |          |         |   |         |          |         |   |          |          |          |   |         |         |          |

Molecule: **1a\_TS3** (*O*-attack)

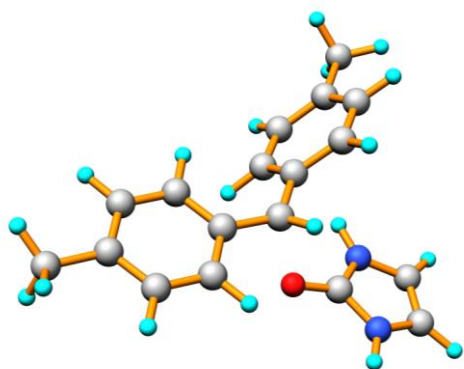

Energy = -882.307712 Hartree  
 Imag. Freq. = -256.3600 cm<sup>-1</sup>

40

|   |          |          |          |
|---|----------|----------|----------|
| C | -0.30512 | 1.35015  | -0.31678 |
| C | 0.67610  | 1.48301  | -1.23902 |
| C | 1.22457  | -0.25916 | 0.09167  |
| N | 0.03730  | 0.27548  | 0.49085  |
| H | -1.21099 | 1.91654  | -0.17209 |
| N | 1.61892  | 0.50183  | -0.96837 |
| O | 1.84002  | -1.26492 | 0.56070  |
| H | 0.77961  | 2.17642  | -2.05822 |
| C | 3.06798  | -2.48107 | 2.49806  |
| C | 2.45828  | -1.17496 | 2.36778  |
| C | 1.28024  | -0.74926 | 3.10737  |
| C | 4.17202  | -2.79431 | 1.68212  |
| C | 4.79453  | -4.02131 | 1.78005  |
| C | 4.35978  | -4.97720 | 2.71127  |
| C | 3.28734  | -4.65003 | 3.54841  |
| C | 2.64353  | -3.42878 | 3.44476  |
| C | 0.13197  | -1.55640 | 3.20073  |
| C | -1.00093 | -1.08608 | 3.84336  |
| C | -1.02665 | 0.18942  | 4.43198  |
| C | 0.11352  | 0.99188  | 4.32369  |
| C | 1.24349  | 0.53958  | 3.65708  |
| H | 3.15730  | -0.37260 | 2.13401  |
| H | 4.51874  | -2.06584 | 0.95461  |
| H | 1.84513  | -3.18779 | 4.13785  |
| H | 0.12051  | -2.52946 | 2.71772  |
| H | 2.11352  | 1.18553  | 3.56994  |
| H | -1.88678 | -1.71408 | 3.89517  |
| H | 0.11066  | 1.98693  | 4.76011  |
| H | 2.96258  | -5.36244 | 4.30163  |
| H | 5.63836  | -4.25077 | 1.13506  |
| C | 5.02576  | -6.31543 | 2.79808  |
| H | 4.57052  | -7.00742 | 2.07787  |
| H | 6.08985  | -6.24951 | 2.55590  |
| H | 4.91619  | -6.75720 | 3.79141  |
| C | -2.23993 | 0.66471  | 5.17222  |
| H | -2.20667 | 0.31113  | 6.21036  |
| H | -2.29412 | 1.75571  | 5.20021  |
| H | -3.16041 | 0.27565  | 4.72848  |
| H | 2.45481  | 0.30892  | -1.49837 |
| H | -0.48192 | -0.07490 | 1.28464  |

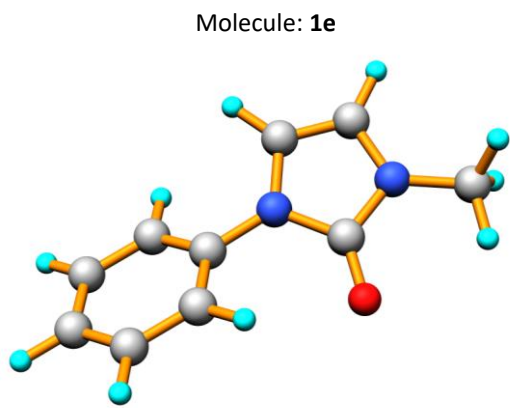

Energy = -572.095715 Hartree

23

|   |          |          |          |
|---|----------|----------|----------|
| C | 0.35714  | 1.76721  | -0.55038 |
| C | 1.59778  | 2.26731  | -0.71847 |
| C | 1.83580  | 0.03086  | -0.33301 |
| N | 0.47704  | 0.39619  | -0.30566 |
| H | -0.59442 | 2.27174  | -0.52416 |
| C | -0.60101 | -0.50419 | -0.15505 |
| C | -0.46727 | -1.64437 | 0.64140  |
| C | -1.81209 | -0.24001 | -0.80001 |
| C | -1.54885 | -2.50400 | 0.78773  |
| H | 0.47855  | -1.85199 | 1.12589  |
| C | -2.88876 | -1.10211 | -0.63057 |
| H | -1.90543 | 0.62294  | -1.45189 |
| C | -2.76366 | -2.23848 | 0.16201  |
| H | -1.43878 | -3.38946 | 1.40701  |
| H | -3.82583 | -0.88912 | -1.13666 |
| H | -3.60410 | -2.91431 | 0.28666  |
| N | 2.50137  | 1.22076  | -0.59140 |
| O | 2.33029  | -1.07713 | -0.18119 |
| C | 3.94166  | 1.29948  | -0.71820 |
| H | 4.34222  | 0.29944  | -0.53624 |
| H | 4.22996  | 1.62354  | -1.72501 |
| H | 4.36031  | 1.99500  | 0.01813  |
| H | 1.91707  | 3.28370  | -0.88892 |

Molecule: **1e\_TS1** (C<sup>4</sup>-attack)

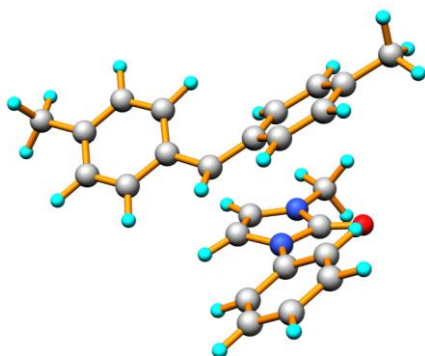

Energy = -1152.783373 Hartree  
 Imag. Freq. = -338.6200 cm<sup>-1</sup>

53

|   |          |          |          |
|---|----------|----------|----------|
| C | 0.77530  | 1.91262  | -0.39773 |
| C | 2.10448  | 2.20650  | -0.69947 |
| C | 1.92427  | -0.05136 | -0.51318 |
| N | 0.66131  | 0.51960  | -0.39019 |
| H | -0.06280 | 2.54396  | -0.64655 |
| C | -0.54988 | -0.19369 | -0.14736 |
| C | -0.52295 | -1.44533 | 0.46962  |
| C | -1.76269 | 0.38451  | -0.52512 |
| C | -1.72212 | -2.10510 | 0.71095  |
| H | 0.42089  | -1.89613 | 0.74821  |
| C | -2.95282 | -0.28421 | -0.26346 |
| H | -1.79177 | 1.33327  | -1.05175 |
| C | -2.93780 | -1.52964 | 0.35505  |
| H | -1.70083 | -3.08184 | 1.18435  |
| H | -3.89348 | 0.16648  | -0.56357 |
| H | -3.86822 | -2.05347 | 0.54873  |
| N | 2.79525  | 1.06893  | -0.72356 |
| O | 2.28850  | -1.20135 | -0.47385 |
| C | 4.22575  | 0.86980  | -0.91194 |
| H | 4.60879  | 0.25161  | -0.09534 |
| H | 4.40255  | 0.34767  | -1.85667 |
| H | 4.72408  | 1.84066  | -0.92171 |
| H | 2.55791  | 3.18194  | -0.81662 |
| C | 1.01544  | 3.93807  | 1.73281  |
| C | 0.79130  | 2.50017  | 1.69481  |
| C | 1.62362  | 1.48235  | 2.29833  |
| C | 0.07568  | 4.78418  | 1.11148  |
| C | 0.23296  | 6.15712  | 1.11886  |
| C | 1.32217  | 6.75383  | 1.76879  |
| C | 2.23403  | 5.91808  | 2.42300  |
| C | 2.09068  | 4.54025  | 2.40985  |
| C | 3.03272  | 1.50452  | 2.28512  |
| C | 3.76240  | 0.47850  | 2.85784  |
| C | 3.12618  | -0.61845 | 3.45581  |
| C | 1.72621  | -0.65297 | 3.45415  |
| C | 0.99038  | 0.36548  | 2.87878  |
| H | -0.26651 | 2.22977  | 1.68285  |
| H | -0.79522 | 4.35379  | 0.62102  |
| H | 2.78434  | 3.93312  | 2.97975  |
| H | 3.55816  | 2.31963  | 1.79655  |
| H | -0.09506 | 0.31268  | 2.88205  |
| H | 4.84853  | 0.51602  | 2.83784  |
| H | 1.21150  | -1.49751 | 3.90457  |
| H | 3.06202  | 6.36014  | 2.97098  |
| H | -0.50481 | 6.78489  | 0.62620  |
| C | 1.46929  | 8.24404  | 1.81188  |
| H | 0.89892  | 8.65617  | 2.65396  |
| H | 2.51225  | 8.54143  | 1.94647  |
| H | 1.08482  | 8.71064  | 0.90093  |
| C | 3.91846  | -1.71689 | 4.09378  |
| H | 3.97735  | -1.55613 | 5.17781  |
| H | 3.44690  | -2.69090 | 3.93692  |
| H | 4.94054  | -1.75445 | 3.70994  |

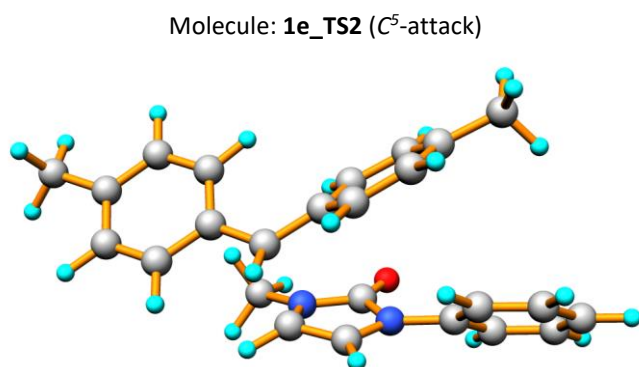

Energy = -1152.778906 Hartree  
 Imag. Freq. = -392.0800  $\text{cm}^{-1}$

53

|   |          |          |          |
|---|----------|----------|----------|
| C | 0.30671  | 0.90910  | 0.66011  |
| C | 0.24182  | 2.28756  | 0.44090  |
| C | 1.69751  | 1.40611  | -1.07651 |
| N | 1.21089  | 0.37609  | -0.16889 |
| H | -0.21156 | 0.32557  | 1.40850  |
| C | 1.70599  | -0.95835 | -0.15019 |
| C | 2.03416  | -1.59421 | -1.34749 |
| C | 1.83875  | -1.61054 | 1.07539  |
| C | 2.49667  | -2.90324 | -1.30211 |
| H | 1.92690  | -1.07738 | -2.29283 |
| C | 2.29376  | -2.92171 | 1.10014  |
| H | 1.62566  | -1.08654 | 2.00133  |
| C | 2.62625  | -3.56942 | -0.08668 |
| H | 2.75015  | -3.40760 | -2.22901 |
| H | 2.39966  | -3.43361 | 2.05163  |
| H | 2.98709  | -4.59286 | -0.06427 |
| N | 1.02889  | 2.54078  | -0.67934 |
| O | 2.50891  | 1.26464  | -1.95764 |
| C | 1.11448  | 3.79944  | -1.41339 |
| H | 1.70017  | 3.61312  | -2.31581 |
| H | 0.11098  | 4.13474  | -1.69302 |
| H | 1.75545  | 1.20797  | 4.14835  |
| H | -0.61975 | 2.90593  | 0.65167  |
| C | 1.46660  | 4.38314  | 1.89715  |
| C | 1.36082  | 2.96651  | 2.20223  |
| C | 2.49009  | 2.05949  | 2.30390  |
| C | 0.30254  | 5.17926  | 1.92802  |
| C | 0.35398  | 6.53054  | 1.65458  |
| C | 1.57333  | 7.16000  | 1.35554  |
| C | 2.73550  | 6.38123  | 1.36574  |
| C | 2.69181  | 5.02217  | 1.63126  |
| C | 3.51383  | 1.98028  | 1.34098  |
| C | 4.52060  | 1.03435  | 1.45715  |
| C | 4.56897  | 0.15544  | 2.54356  |
| C | 3.56560  | 0.25365  | 3.51777  |
| C | 2.53106  | 1.16216  | 3.38708  |
| H | 0.54053  | 2.72782  | 2.87980  |
| H | -0.65402 | 4.72251  | 2.17431  |
| H | 3.61846  | 4.46238  | 1.67799  |
| H | 3.51070  | 2.63854  | 0.47872  |
| H | 1.60379  | 4.57273  | -0.81479 |
| H | 5.28433  | 0.97578  | 0.68641  |
| H | 3.59520  | -0.40397 | 4.38291  |
| H | 3.69521  | 6.85485  | 1.17712  |
| H | -0.55826 | 7.12071  | 1.68208  |
| C | 5.63918  | -0.88819 | 2.64209  |
| H | 6.57651  | -0.54437 | 2.19688  |
| H | 5.82720  | -1.17539 | 3.67969  |
| H | 5.33254  | -1.79134 | 2.09788  |
| C | 1.62791  | 8.63289  | 1.09311  |
| H | 0.75589  | 8.96980  | 0.52532  |
| H | 1.62724  | 9.18455  | 2.04193  |
| H | 2.53332  | 8.91289  | 0.54976  |

Molecule: **1e\_TS3** (*O*-attack)

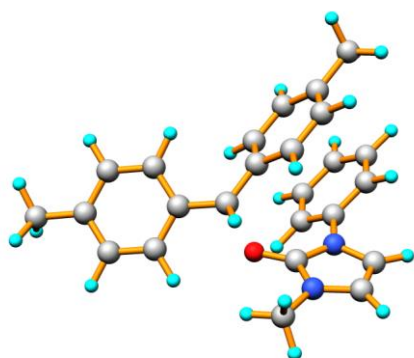

Energy = -1152.790086 Hartree  
 Imag. Freq. = -267.3200 cm<sup>-1</sup>

53

|   |          |          |          |
|---|----------|----------|----------|
| C | -0.23849 | 1.38711  | -0.55375 |
| C | 1.01157  | 1.78576  | -0.88523 |
| C | 1.17958  | -0.25269 | 0.04823  |
| N | -0.13911 | 0.13197  | 0.03106  |
| H | -1.19150 | 1.86252  | -0.72075 |
| C | -1.24726 | -0.62480 | 0.52058  |
| C | -1.30670 | -1.99926 | 0.30576  |
| C | -2.26961 | 0.04676  | 1.18489  |
| C | -2.40623 | -2.70505 | 0.77870  |
| H | -0.50784 | -2.50604 | -0.22348 |
| C | -3.37237 | -0.67038 | 1.63366  |
| H | -2.19623 | 1.11427  | 1.36930  |
| C | -3.44025 | -2.04611 | 1.43865  |
| H | -2.46296 | -3.77600 | 0.61022  |
| H | -4.17748 | -0.14923 | 2.14236  |
| H | -4.30307 | -2.60348 | 1.78986  |
| N | 1.88131  | 0.77808  | -0.51005 |
| O | 1.66432  | -1.33948 | 0.49325  |
| C | 3.32064  | 0.76405  | -0.74153 |
| H | 3.68680  | -0.24765 | -0.56182 |
| H | 3.52773  | 1.03968  | -1.77896 |
| H | 3.82796  | 1.46537  | -0.07151 |
| H | 1.35063  | 2.68273  | -1.37990 |
| C | 2.99020  | -2.52589 | 2.41977  |
| C | 2.35771  | -1.22261 | 2.26899  |
| C | 1.21210  | -0.79225 | 3.04110  |
| C | 3.92421  | -2.96123 | 1.46239  |
| C | 4.57921  | -4.16698 | 1.61070  |
| C | 4.35453  | -4.97815 | 2.73345  |
| C | 3.45580  | -4.52765 | 3.70272  |
| C | 2.77628  | -3.32789 | 3.55188  |
| C | 0.17054  | -1.67446 | 3.38402  |
| C | -0.92520 | -1.21905 | 4.08877  |
| C | -1.03691 | 0.12792  | 4.46420  |
| C | -0.01671 | 1.01090  | 4.09530  |
| C | 1.08702  | 0.56220  | 3.38722  |
| H | 3.03940  | -0.41913 | 1.99013  |
| H | 4.10598  | -2.35425 | 0.58134  |
| H | 2.12100  | -2.98512 | 4.34499  |
| H | 0.20990  | -2.70630 | 3.05046  |
| H | 1.87588  | 1.26032  | 3.11576  |
| H | -1.72916 | -1.90805 | 4.33281  |
| H | -0.09049 | 2.05971  | 4.37017  |
| H | 3.29404  | -5.12104 | 4.59836  |
| H | 5.28498  | -4.49241 | 0.85092  |
| C | 5.06100  | -6.29194 | 2.87699  |
| H | 4.58313  | -7.05070 | 2.24488  |
| H | 6.10480  | -6.21812 | 2.55752  |
| H | 5.03527  | -6.65348 | 3.90742  |
| C | -2.22344 | 0.60187  | 5.24661  |
| H | -2.06516 | 0.42641  | 6.31811  |
| H | -2.39531 | 1.67290  | 5.11242  |
| H | -3.12906 | 0.05833  | 4.96204  |

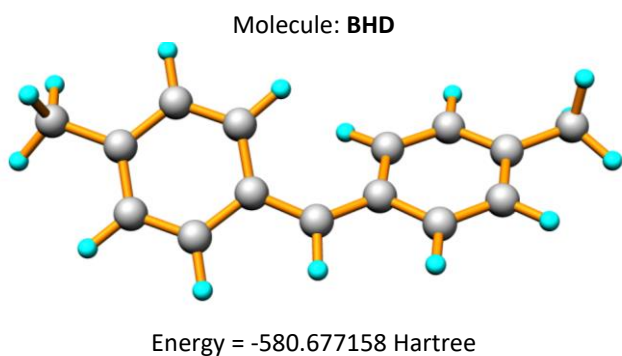

30

|   |          |          |         |
|---|----------|----------|---------|
| C | 1.11471  | 4.18858  | 2.07786 |
| C | 0.74844  | 2.83258  | 2.19005 |
| C | 1.52864  | 1.71133  | 2.53579 |
| C | 0.24043  | 5.05254  | 1.36348 |
| C | 0.56079  | 6.37605  | 1.16990 |
| C | 1.73205  | 6.91907  | 1.72612 |
| C | 2.57064  | 6.08289  | 2.49144 |
| C | 2.28007  | 4.75180  | 2.66657 |
| C | 2.94815  | 1.67489  | 2.46614 |
| C | 3.63162  | 0.54236  | 2.83713 |
| C | 2.95121  | -0.60202 | 3.30141 |
| C | 1.54587  | -0.58537 | 3.33648 |
| C | 0.84706  | 0.53031  | 2.93860 |
| H | -0.30042 | 2.61835  | 1.97833 |
| H | -0.67115 | 4.64576  | 0.93386 |
| H | 2.90261  | 4.14799  | 3.31740 |
| H | 3.48999  | 2.51329  | 2.04276 |
| H | -0.23938 | 0.52828  | 2.96215 |
| H | 4.71393  | 0.51353  | 2.74809 |
| H | 1.01022  | -1.47059 | 3.66650 |
| H | 3.44842  | 6.50982  | 2.96868 |
| H | -0.10175 | 7.01489  | 0.59344 |
| C | 2.05469  | 8.36552  | 1.56790 |
| H | 1.71986  | 8.91680  | 2.45780 |
| H | 3.13303  | 8.52740  | 1.48218 |
| H | 1.55174  | 8.80270  | 0.70277 |
| C | 3.71258  | -1.80778 | 3.73441 |
| H | 4.03550  | -1.68022 | 4.77739 |
| H | 3.10379  | -2.71336 | 3.68848 |
| H | 4.61765  | -1.94738 | 3.13691 |
